# Supplementary material for: Tuning diastereoisomerism in platinum(ii) phosphino- and aminothiolato hydrido complexes
Source: Royal Society of Chemistry journal article supplement (doi:10.1039/c6nj04042j), 2017-01-01
Supplement: c6nj04042j1.pdf [file c6nj04042j1.pdf]

## New Journal of Chemistry

### Supporting Information for

### Tuning Diastereoisomerism in platinum(II) phosphino- and aminothiolato hydrido complexes

Alfonso Polo,\*<sup>[a]</sup> Josep Duran,<sup>[a]</sup> Roser Juanola,<sup>[a]</sup> Julio Real,<sup>[b]</sup> Jordi Benet-Buchholz,<sup>[c]</sup> Miquel Solà,<sup>[a,d]</sup> and Albert Poater\*<sup>[a,d]</sup>

- 
- [a] Dr. A. Polo,\* Dr. J. Duran, Dr. R. Juanola  
Departament de Química, Universitat de Girona, Facultat de Ciències, Ma. Aurèlia Campmany 69, 17003 Girona, Catalonia, Spain  
E-mail: alfons.polo@udg.edu
- [b] Dr. J. Real  
Departament de Química, Universitat Autònoma de Barcelona, 08193 Bellaterra, Spain
- [c] Dr. J. Benet-Buchholz  
Institute of Chemical Research of Catalonia (ICIQ), Av. Països Catalans 16, 43007 Tarragona, Spain
- [d] Prof. Dr. M. Solà, Dr. A. Poater\*  
Institut de Química Computacional i Catàlisi, Universitat de Girona, Campus Montilivi, 17003 Girona, Catalonia, Spain  
E-mail: albert.poater@udg.edu

Figure S1.  $^1\text{H}$  NMR ( $\text{CDCl}_3$ , 200.13 MHz, 293 K) of ligand **3**.

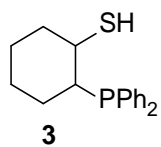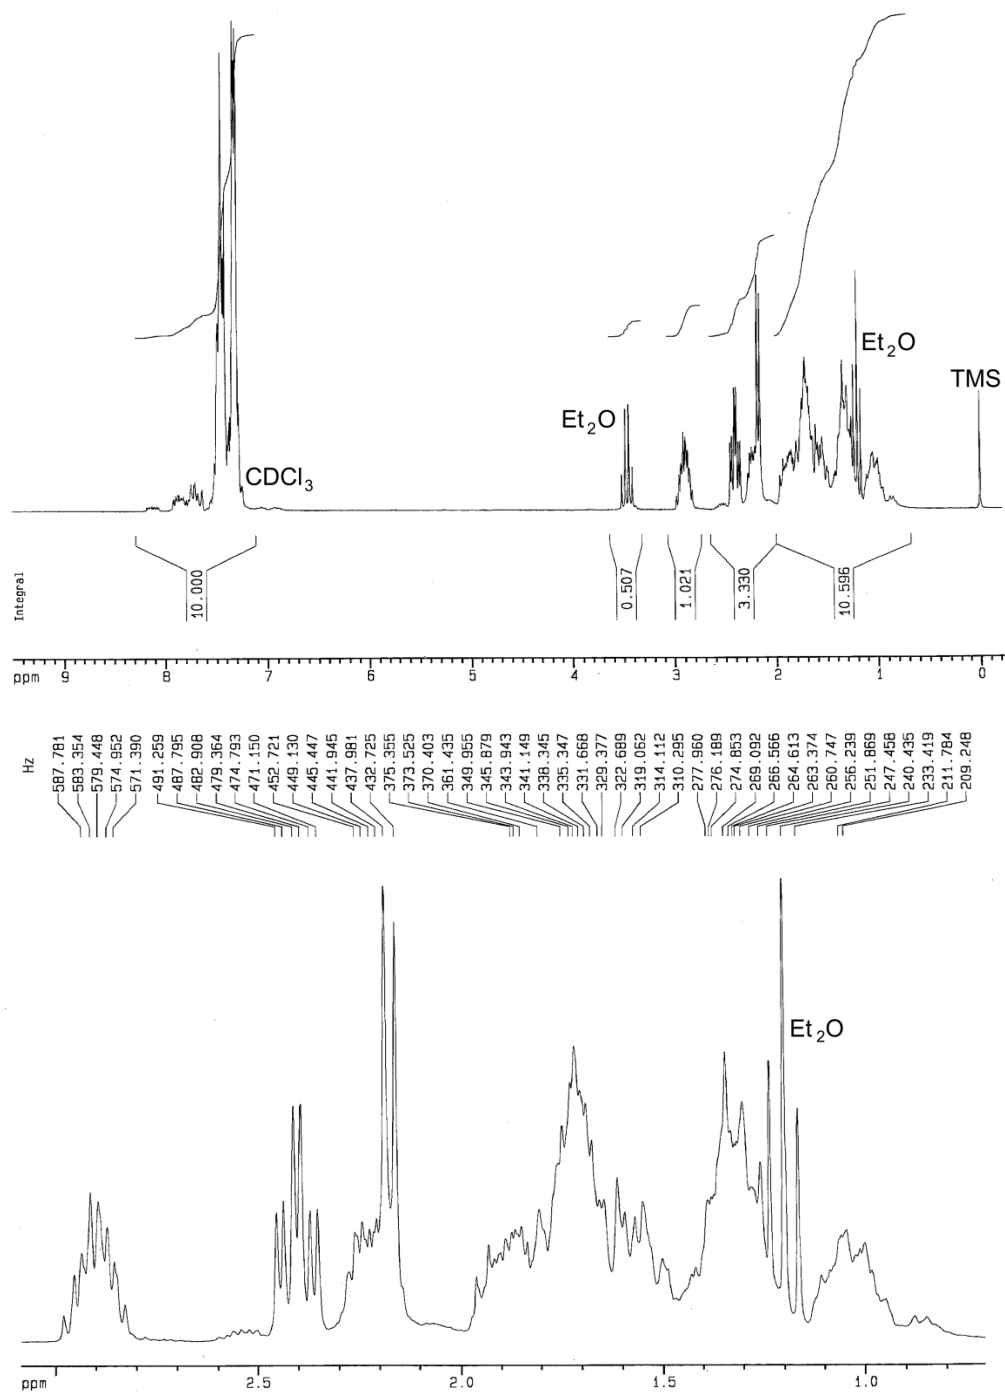

Figure S2.  $^{13}\text{C}\{^1\text{H}\}$  NMR ( $\text{CDCl}_3$ , 50.32 MHz, 293 K) of ligand **3**.

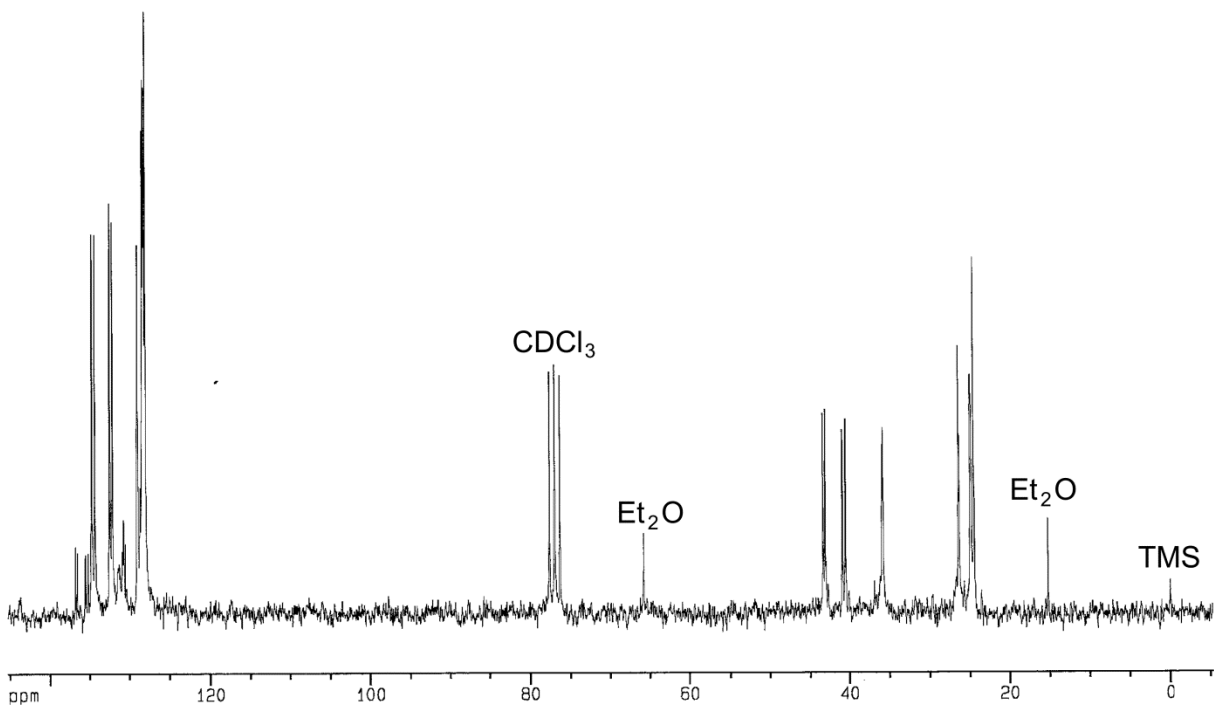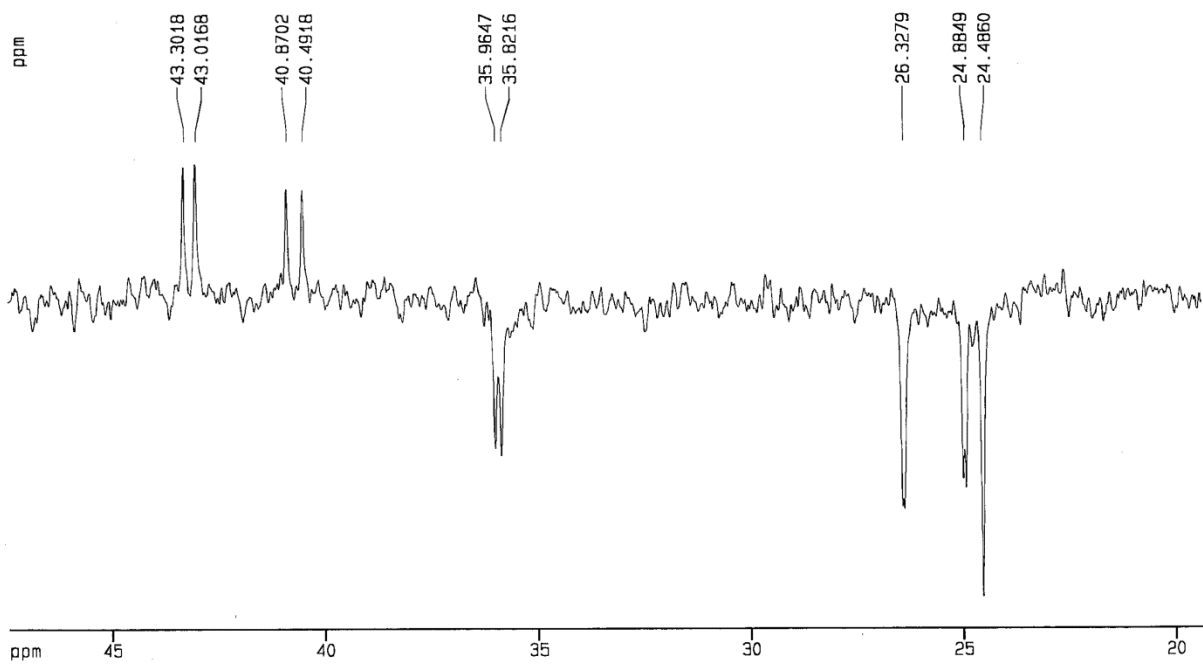

**Figure S3.**  $^{31}\text{P}\{^1\text{H}\}$  NMR ( $\text{CDCl}_3$ , 81.01 MHz, 293 K) of ligand **3**.

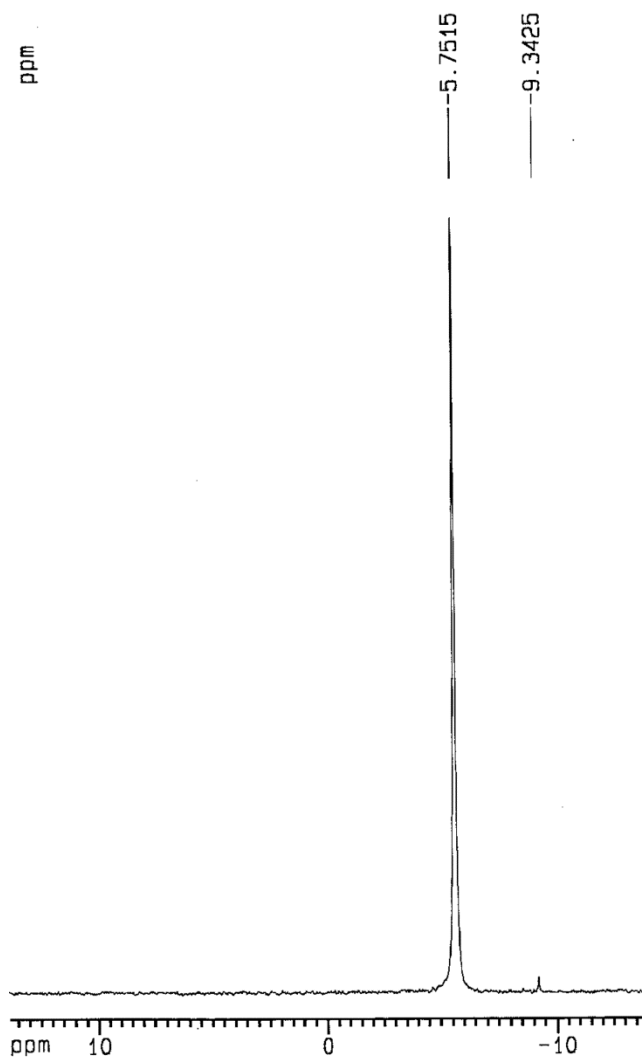

**Figure S4.** Hydride region of  $^1\text{H}$  NMR (left) and  $^{31}\text{P}\{^1\text{H}\}$  NMR (right) of a mixture of free triphenylphosphine with hydrido[1-(benzyloxy)-2-(diphenylphosphino- $\kappa P$ )ethanethiolato- $\kappa S$ ]triphenylphosphino-platinum(II) (**9**) at room temperature (up) and at low temperature (down).

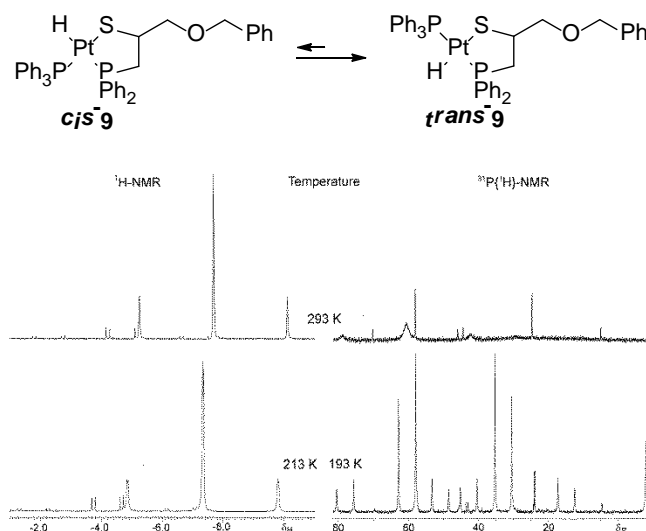

In solution, complex **9** shows a similar behavior to complex **8** with chemical equilibrium between *cis-9* and *trans-9* isomers (*SP-4-3* and *SP-4-4* configuration respectively) strongly displaced toward the *trans-P,P* form. For complex **9** this equilibrium is slightly more displaced (ca. 90% of *trans-9*). At room temperature, the hydride resonance of the major isomer appears as a singlet with  $^{195}\text{Pt}$  satellites that transforms into a broad doublet when the sample is cooled to  $-60^\circ\text{C}$ . Further cooling just results in a loss of resolution of the spectrum. For isomer *trans-9*, the hydride resonance does not resolve at low temperature because the rapid exchange with the free  $\text{PPh}_3$  present in solution. At room temperature, the  $^{31}\text{P}\{^1\text{H}\}$  NMR of isomer *trans-9* shows only a broad band with  $^{195}\text{Pt}$  satellites for the  $\text{PPh}_2$  group. No signal is observed for the free or the coordinated  $\text{PPh}_3$ . The expected doublets for the coordinated phosphorous and the singlet for the free  $\text{PPh}_3$  appear when the solution is cooled to  $-80^\circ\text{C}$ . As in complex **8**, the minor isomer *cis-9* shows temperature independent NMR spectra in whole the range studied.

**Figure S5.** Hydride region of  $^1\text{H}$  NMR (left) and  $^{31}\text{P}\{^1\text{H}\}$  NMR (right) of hydrido[2-(diphenylphosphino- $\kappa P$ )-cyclohexanethiolato- $\kappa S$ ]triphenyl-phosphineplatinum(II) (**10**) at room temperature (up) and at low temperature (down).

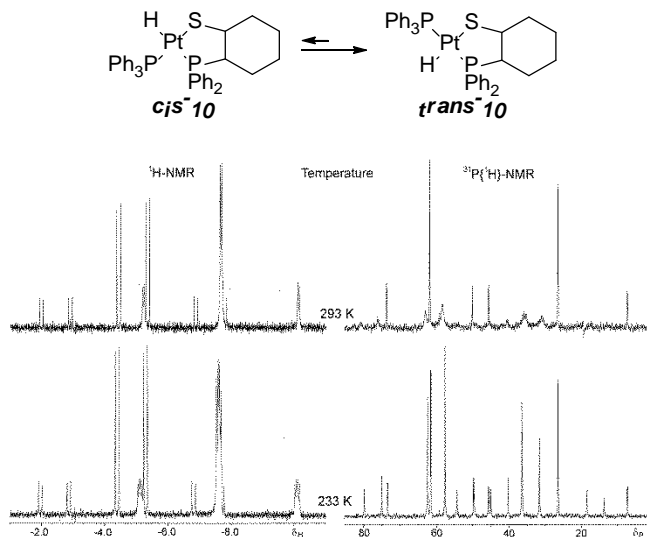

The same *cis/trans* equilibrium observed for complexes **8** and **9** in solution is observed for complex **10** (ca. 70% *trans-10*). As for the previous phosphinothiolate complexes, the major isomer of **10** shows temperature dependent NMR spectrums. At room temperature, the hydride resonance of the major isomer appears as a broad doublet with  $^{195}\text{Pt}$  satellites that transforms into the predictable doublet of doublets when the sample is cooled to  $-40^\circ\text{C}$ . At room temperature, the  $^{31}\text{P}\{^1\text{H}\}$  NMR of isomer *trans-10* shows only two broad doublets, one for each phosphorous coordinated, with  $^{195}\text{Pt}$  satellites. At  $-40^\circ\text{C}$ , these signals transform in sharp doublets. Once more, the minor isomer *cis-10* has a different behavior showing, in whole temperature range studied, temperature independent NMR spectrums.

**Figure S6.** Frontier molecular orbitals of **5** and **8**.

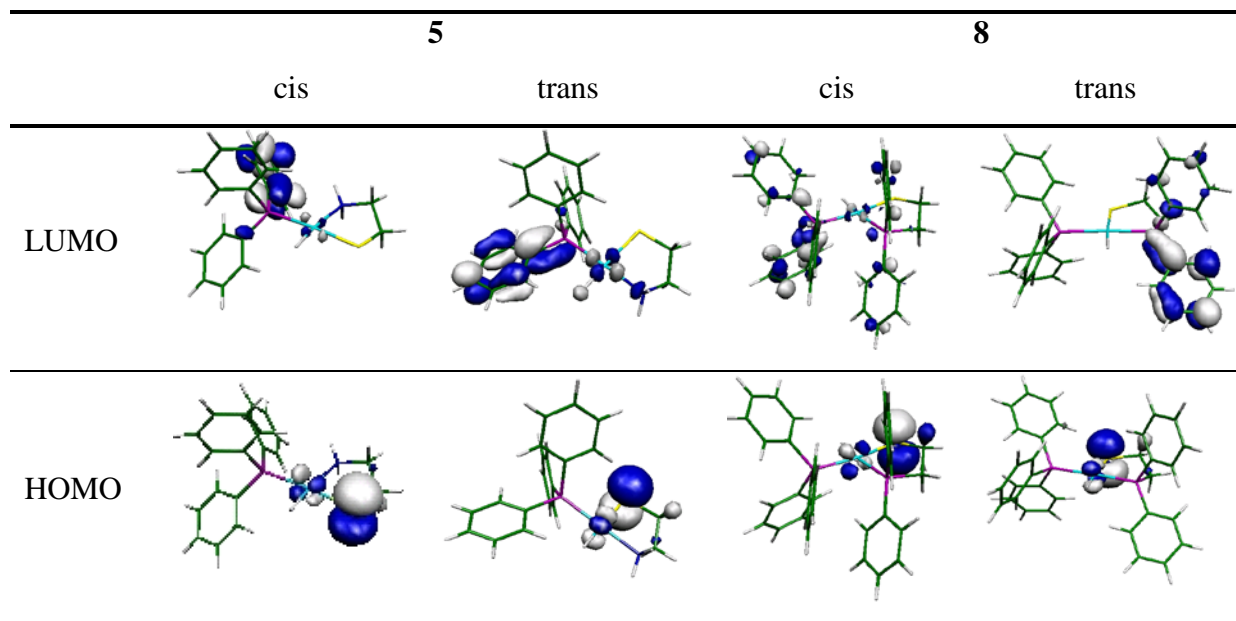

**Figure S7.** Addition of an extra PPh<sub>3</sub> ligand to *cis*-8 and *trans*-8.

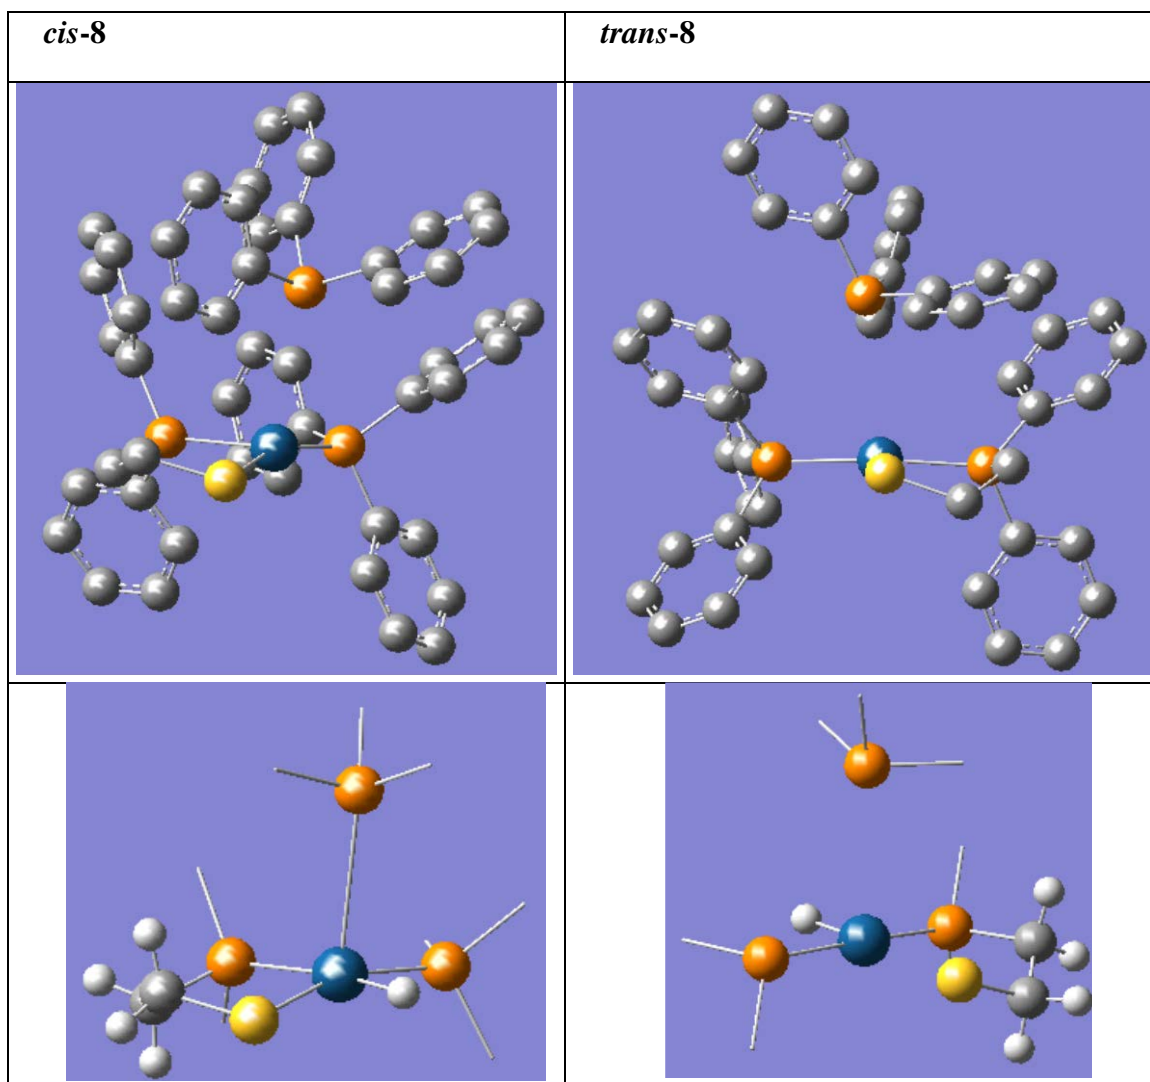



**Figure S8.** Hydride region of  $^1\text{H}$  NMR (400,20 Mhz, left) and  $^{31}\text{P}\{^1\text{H}\}$  NMR (162.01 MHz, right) of hydrido[2-(diphenylphosphino- $\kappa P$ )ethanethiolato- $\kappa S$ ]triphenylphosphinoplatinum(II) (**8**). Dissolved at  $-78\text{ }^\circ\text{C}$ , under nitrogen atmosphere, with precooled dichloromethane and recorded directly at  $-60\text{ }^\circ\text{C}$  (up) and after leaving temperature raise to room temperature (down).

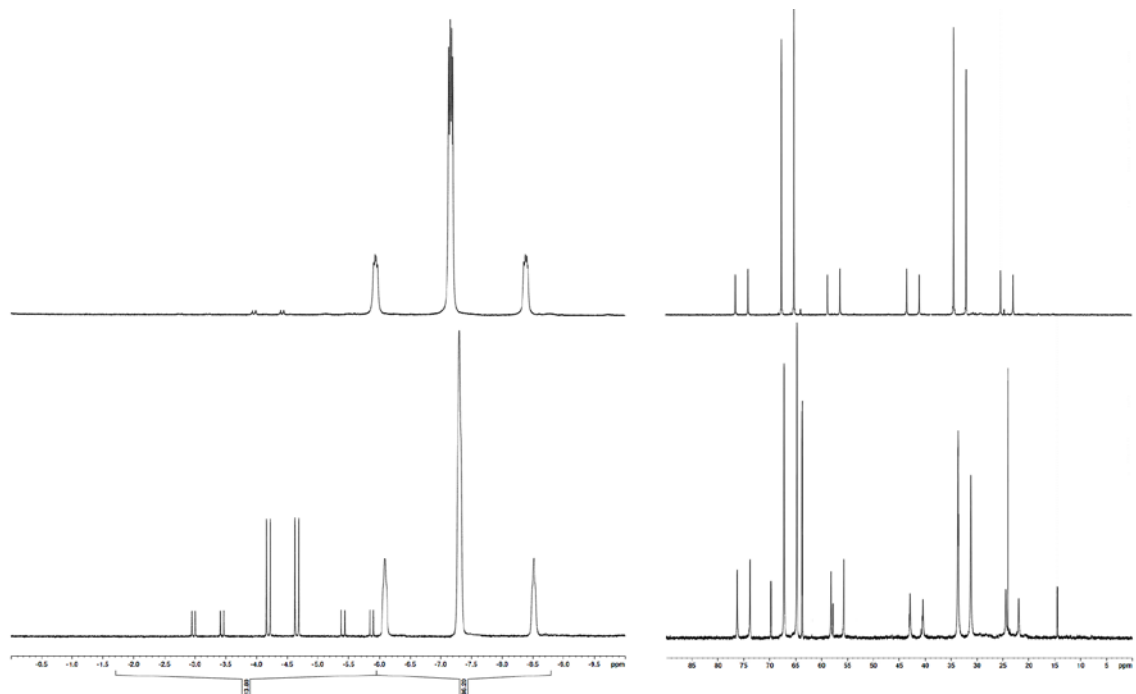

**Table S1.** Crystallographic data for **5-8**

|                                                | <b>5</b>                                    | <b>6</b>                                             | <b>7</b>                                             | <b>8</b>                                           |
|------------------------------------------------|---------------------------------------------|------------------------------------------------------|------------------------------------------------------|----------------------------------------------------|
| formula                                        | C <sub>20</sub> H <sub>22</sub> NPPtS       | C <sub>22</sub> H <sub>27</sub> NO <sub>2</sub> PPtS | C <sub>23</sub> H <sub>26</sub> NO <sub>2</sub> PPtS | C <sub>32</sub> H <sub>30</sub> P <sub>2</sub> PtS |
| fw                                             | 534.51                                      | 595.57                                               | 606.57                                               | 703.65                                             |
| crystal size (mm <sup>3</sup> )                | 0.02 x 0.04 x 0.7                           | 0.01 x 0.06 x 0.07                                   | 0.04 x 0.04 x 0.08                                   | 0.90 x 0.70 x 0.04                                 |
| crystal color                                  | white                                       | white                                                | white                                                | white                                              |
| temp (K)                                       | 153(2)                                      | 153(2)                                               | 153(2)                                               | 153(2)                                             |
| cryst syst                                     | monoclinic                                  | triclinic                                            | triclinic                                            | monoclinic                                         |
| space group                                    | <i>P</i> 2 <sub>1</sub> / <i>c</i> (No. 14) | <i>P</i> $\bar{1}$ (No. 2)                           | <i>P</i> 1 (No. 1)                                   | <i>P</i> 2 <sub>1</sub> / <i>n</i> (No. 14)        |
| <i>a</i> (Å)                                   | 11.2021(6)                                  | 9.2097(15)                                           | 9.3040(2)                                            | 9.6068(3)                                          |
| <i>b</i> (Å)                                   | 8.9266(5)                                   | 9.9559(17)                                           | 10.1733(2)                                           | 29.7785(11)                                        |
| <i>c</i> (Å)                                   | 19.0001(10)                                 | 13.363(2)                                            | 13.5601(3)                                           | 10.3464(4)                                         |
| $\alpha$ (deg)                                 | 90                                          | 75.392(6)                                            | 73.6710(10)                                          | 90                                                 |
| $\beta$ (deg)                                  | 90.030(2)                                   | 87.912(8)                                            | 87.5860(10)                                          | 111.467(2)                                         |
| $\gamma$ (deg)                                 | 90                                          | 63.361(6)                                            | 63.5340(10)                                          | 90                                                 |
| <i>V</i> (Å <sup>3</sup> )                     | 1899.95(18)                                 | 1055.6 (3)                                           | 1097.46 (4)                                          | 2754.53(17)                                        |
| <i>Z</i>                                       | 4                                           | 2                                                    | 2                                                    | 4                                                  |
| $\rho$ (g/cm <sup>3</sup> )                    | 1.869                                       | 1.864                                                | 1.836                                                | 1.697                                              |
| $\mu$ (mm <sup>-1</sup> )                      | 7.580                                       | 6.838                                                | 6.580                                                | 5.306                                              |
| Theta max (°)                                  | 31.54                                       | 31.56                                                | 31.51                                                | 31.53                                              |
| Completeness 2 $\theta$ 25°                    | 99.9 %                                      | 97.4 %                                               | 99.3 %                                               | 99.3 %                                             |
| no. of rflns measd                             | 28029                                       | 15686                                                | 17158                                                | 42246                                              |
| no. of unique rflns                            | 6108 [R <sub>int</sub> = 0.0802]            | 6372 [R <sub>int</sub> = 0.1262]                     | 13211 [R <sub>int</sub> = 0.0333]                    | 8644 [R <sub>int</sub> = 0.0750]                   |
| absorption corr.                               | Empirical                                   | Empirical                                            | Empirical                                            | Empirical                                          |
| transm min/max                                 | 0.38307/1.00000                             | 0.93412/1.00000                                      | 0.67855/1.00000                                      | 0.555/1.000                                        |
| no. of params                                  | 238                                         | 273                                                  | 527                                                  | 431                                                |
| R1/wR2 ( <i>I</i> >2 $\sigma$ ( <i>I</i> ))    | 0.0411/0.0909                               | 0.0601/0.1087                                        | 0.0471/0.1190                                        | 0.0540/0.1378                                      |
| R1/wR2 (all data)                              | 0.0583/0.0967                               | 0.1177/0.1232                                        | 0.0513/0.1214                                        | 0.0798/0.1378                                      |
| goodness-of-fit on <i>F</i> <sup>2</sup>       | 0.981                                       | 0.852                                                | 1.039                                                | 1.036                                              |
| Largest diff peak,<br>hole (e/Å <sup>3</sup> ) | 2.064 and -3.139                            | 1.898 and -2.666                                     | 1.423 and -3.571                                     | 6.202 and -2.872                                   |
| Abs Struc Flack Para.                          |                                             |                                                      | -0.001(12)                                           |                                                    |

**Table S2.** Comparison between the XRD data (molecule A) and the corresponding BP86 geometry for complex *cis-7*.

| Distances [Å] | BP86  | XRD   | Angles [deg] | BP86    | XRD     |
|---------------|-------|-------|--------------|---------|---------|
| Pt-S          | 2.361 | 2.291 | N-Pt-S       | 84.565  | 83.938  |
| Pt-N          | 2.243 | 2.176 | Pt-P-C1      | 116.642 | 118.170 |
| Pt-P          | 2.264 | 2.228 | Pt-P-C25     | 115.551 | 114.399 |
| N-C35         | 1.475 | 1.489 | Pt-P-C39     | 110.187 | 112.680 |
| C35-C44       | 1.535 | 1.501 | P-C15-C8     | 117.130 | 118.402 |
| S-C44         | 1.845 | 1.836 | C15-C8-C4    | 119.156 | 120.533 |
| C35-C26       | 1.525 | 1.522 | C4-C3-C6     | 118.220 | 119.714 |
| C24-C29       | 1.519 | 1.331 | C6-C12-C15   | 122.023 | 120.275 |
| P-C15         | 1.843 | 1.830 | C12-C15-C8   | 119.115 | 119.055 |
| P-C25         | 1.841 | 1.811 | C35-C44-S    | 111.830 | 111.891 |
| P-C39         | 1.841 | 1.808 | C44-S-Pt     | 98.102  | 98.569  |
| C3-C6         | 1.397 | 1.404 | C35-C26-O32  | 111.319 | 111.891 |
| C6-C12        | 1.400 | 1.370 | C35-C26-O17  | 124.034 | 123.912 |
| C12-C15       | 1.403 | 1.364 | O17-C26-O32  | 124.614 | 124.141 |
| C25-C13       | 1.406 | 1.429 | C26-O32-C24  | 117.657 | 118.228 |
| C13-C11       | 1.397 | 1.406 | P-C25-C31    | 122.507 | 123.174 |
| C11-C18       | 1.399 | 1.366 | C25-C31-C11  | 120.344 | 121.376 |
| C18-C30       | 1.398 | 1.387 | C13-C11-C18  | 120.103 | 118.322 |
| C30-C33       | 1.398 | 1.393 | C11-C18-C30  | 119.832 | 120.484 |
| C33-C25       | 1.405 | 1.372 | C18-C30-C33  | 120.250 | 122.996 |
| C39-C41       | 1.405 | 1.395 | C30-C33-C25  | 120.227 | 118.094 |
| C41-C48       | 1.396 | 1.411 | C33-C25-P    | 118.254 | 118.116 |
| C48-C53       | 1.400 | 1.411 | P-C39-C41    | 122.205 | 121.863 |
| C53-C52       | 1.397 | 1.381 | C39-C41-C48  | 120.274 | 119.889 |
| C52-C46       | 1.399 | 1.408 | C41-C48-C53  | 120.118 | 121.841 |
| C46-C39       | 1.404 | 1.374 | C48-C53-C52  | 119.884 | 118.974 |
| C26-O17       | 1.211 | 1.337 | C53-C52-C46  | 120.161 | 120.477 |
| C26-O32       | 1.337 | 1.387 | C52-C46-C39  | 120.198 | 119.184 |
| O32-C24       | 1.444 | 1.405 | C46-C39-P    | 118.415 | 118.622 |

Standard deviations for the distances and for the angles,  $s_{n-1} = \sqrt{\frac{\sum_{i=1}^N (CV - EV)^2}{N - 1}}$ , where

CV means calculated value, EV experimental value (X-ray data), and N is the number of distances or angles taken into account.

**Table S3.** Three different methods to analyze the BE (kcal·mol<sup>-1</sup>) by the energy decomposition analysis (EDA) for **5** (Z = NH<sub>2</sub>) and **8** (Z = PPh<sub>2</sub>). Frag2 is the fragment containing the metal species in all cases.

| Method | Complex                 | $\Delta E_{\text{Pauli}}$ | $\Delta E_{\text{oi}}$ | $\Delta E_{\text{elstat}}$ | $\Delta E_{\text{int}}$ | $\Delta E_{\text{def fr.1}}$ | $\Delta E_{\text{def fr. 2}}$ | $\Delta E_{\text{def}}$ | BE     |
|--------|-------------------------|---------------------------|------------------------|----------------------------|-------------------------|------------------------------|-------------------------------|-------------------------|--------|
| 1      | <i>cis</i> - <b>5</b>   | 153.5                     | -66.4                  | -136.9                     | -49.9                   | 0.6                          | 0.8                           | 1.4                     | -48.5  |
| 1      | <i>trans</i> - <b>5</b> | 169.0                     | -77.9                  | -153.1                     | -62.0                   | 0.8                          | 0.7                           | 1.4                     | -60.6  |
| 1      | <i>cis</i> - <b>8</b>   | 161.3                     | -72.0                  | -143.2                     | -53.9                   | 2.3                          | 1.7                           | 4.0                     | -49.9  |
| 1      | <i>trans</i> - <b>8</b> | 140.9                     | -67.6                  | -126.4                     | -53.1                   | 2.3                          | 1.5                           | 3.8                     | -49.3  |
| 2      | <i>cis</i> - <b>5</b>   | 183.1                     | -124.5                 | -255.7                     | -197.1                  | 8.9                          | 13.7                          | 22.5                    | -174.6 |
| 2      | <i>trans</i> - <b>5</b> | 176.5                     | -119.4                 | -251.3                     | -194.2                  | 8.5                          | 13.9                          | 22.3                    | -171.9 |
| 2      | <i>cis</i> - <b>8</b>   | 224.8                     | -147.7                 | -271.4                     | -194.3                  | 7.0                          | 9.3                           | 16.3                    | -177.9 |
| 2      | <i>trans</i> - <b>8</b> | 222.7                     | -148.6                 | -273.9                     | -199.8                  | 10.3                         | 8.7                           | 19.0                    | -180.8 |
| 3      | <i>cis</i> - <b>5</b>   | 287.6                     | -202.7                 | -341.3                     | -256.5                  | 3.2                          | 23.3                          | 26.5                    | -230.0 |
| 3      | <i>trans</i> - <b>5</b> | 295.3                     | -207.6                 | -346.6                     | -258.9                  | 4.4                          | 27.2                          | 31.5                    | -227.4 |
| 3      | <i>cis</i> - <b>8</b>   | 286.0                     | -189.8                 | -326.8                     | -230.6                  | 6.8                          | 24.2                          | 31.0                    | -199.6 |
| 3      | <i>trans</i> - <b>8</b> | 290.4                     | -206.1                 | -331.9                     | -247.6                  | 6.4                          | 39.0                          | 45.5                    | -202.1 |

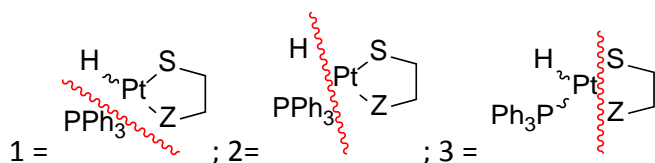

The EDA of the molecule has been done for three different fragmentation schemes (Table S3). The first one takes in account the dissociation of the triphenylphosphine ligand and reflects that BE is similar for all the compounds except for *trans*-**5**, which has the highest value, according to the smaller *trans* influence of the amine group compared with thiolate and phosphine ligands. For 2-phosphinothiolate complex **8**, the Pauli repulsion is higher in the *cis* isomer than the *trans* one, opposite to what happens for 2-aminothiolato complex **5**, because of the entrance of the phosphine in *cis* places the phenyl groups close to each other. Nevertheless, the electrostatic and the orbital interaction terms compensate the higher Pauli repulsions and makes *trans*-**5** and *cis*-**8** the most favorable isomers. The second decomposition method analyzes the BE of the two monodentate ligands that bind the platinum atom with the chelate ligand. The split of the interaction energy confirms that the repulsion is higher in all the *cis* conformations according to the Pauli repulsion term. Furthermore, the values are much higher complex **8** because of the two extra phenyls of the 2-phosphinothiolato ligand. Nevertheless, the energetic difference between both isomers is only 2.1 kcal·mol<sup>-1</sup> because the higher steric repulsions caused by phenyls in *cis* conformation is compensated by the  $\Delta E_{\text{elstat}}$  and  $\Delta E_{\text{orb}}$  terms. The deformation energy is higher because the metal, now, presents one more free position with respect to the extraction of a phosphine ligand. The  $\Delta E_{\text{orb}}$  term is higher for complex **8** due to the higher *trans* influence of the phosphines with respect to the amines. The third method reflects the

BE presented for the fragmentation of the chelate ligand. The results also support the experimental observations. Thus, *cis*-**5** and *trans*-**8** present the higher BE values. In this case the deformation energies are even higher because the position of the ligands in free metal fragment has to change significantly to achieve the geometry that the ligands have in the final complex. The second and the third methods used to describe the binding energies reflect that there is an increase of the electrostatic term, surely due to the charged fragments that appear in these two methods.

The differences found between the behavior of the 2-aminothiolato and 2-phosphinothiolato complexes has been studied from an electronic point of view also. The frontier molecular orbitals for **5** and **8** are depicted in Figure S6 and the relative energies for molecular frontier orbitals of **5-8** are presented in Table S4. For all complexes, the LUMO is more stable energetically for the *cis* isomer, and the gap defined by the difference between the energies of HOMO and LUMO is lower for the same isomer. On the other hand, the HOMO is more stabilized for the *cis* isomer of the 2-aminothiolate complexes **5-7** and for the *trans* isomer of the 2-phosphinothiolate complex **8**, thus the most stable HOMO agrees with the most stable isomer. Moreover, the charge over the metal is lower for the 2-phosphinothiolate complex **8** than for the 2-aminothioalate complexes **5-7** (Table S5), due to major  $\sigma$ -donor power of the phosphine ligand relative to the amine one. The metal is less positively charged when it has the anionic ligands in *cis* position, nevertheless the difference is not quantitatively important.

**Table S4.** Calculated relative energies (kcal·mol<sup>-1</sup>) for frontier molecular orbitals of **5-8**.

|      | <b>5</b>   |              | <b>6</b>   |              | <b>7</b>   |              | <b>8</b>   |              |
|------|------------|--------------|------------|--------------|------------|--------------|------------|--------------|
|      | <i>cis</i> | <i>trans</i> | <i>cis</i> | <i>trans</i> | <i>cis</i> | <i>trans</i> | <i>cis</i> | <i>trans</i> |
| LUMO | -53,8      | -49,2        | -53,5      | -49,8        | -52,9      | -49,7        | -56,1      | -52,7        |
| HOMO | -99.0      | -98.5        | -101.6     | -100.4       | -101.0     | -99.7        | -101.8     | -103.4       |
| GAP  | 45.2       | 49.3         | 48.1       | 50.6         | 48.1       | 50.0         | 45.7       | 50.7         |

**Table S5.** Calculated charges (e<sup>-</sup>) of some atoms of **5-8**.

| Method   | Atom | <b>5</b>   |              | <b>6</b>   |              | <b>7</b>   |              | <b>8</b>   |              |
|----------|------|------------|--------------|------------|--------------|------------|--------------|------------|--------------|
|          |      | <i>cis</i> | <i>trans</i> | <i>cis</i> | <i>trans</i> | <i>cis</i> | <i>trans</i> | <i>cis</i> | <i>trans</i> |
| Mulliken | Pt   | 0.291      | 0.306        | 0.276      | 0.307        | 0.283      | 0.312        | 0.016      | 0.046        |
| Voronoi  | Pt   | 0.067      | 0.080        | 0.067      | 0.080        | 0.066      | 0.081        | 0.046      | 0.055        |
| Mulliken | S    | -0.219     | -0.209       | -0.213     | -0.211       | -0.213     | -0.213       | -0.187     | -0.225       |
| Voronoi  | S    | -0.266     | -0.275       | -0.264     | -0.277       | -0.266     | -0.278       | -0.262     | -0.278       |
| Mulliken | P(2) | -0.219     | -0.209       | -0.213     | -0.211       | -0.213     | -0.213       | -0.187     | -0.225       |
| Voronoi  | P(2) | -0.266     | -0.275       | -0.264     | -0.277       | -0.266     | -0.278       | -0.262     | -0.278       |

**Table S6.** Coordinate data sets and absolute energy (in a.u.), 3D structure for DFT optimized complexes with selected distances (in Å).

| <i>cis-5</i>                                 |                             |           |           |           |           |
|----------------------------------------------|-----------------------------|-----------|-----------|-----------|-----------|
|                                              |                             | H         | -4.494997 | 3.246631  | -4.471568 |
|                                              |                             | H         | -3.117080 | 1.164439  | -4.414016 |
|                                              |                             | C         | -4.463912 | 2.634331  | -3.566905 |
|                                              |                             | C         | -3.690218 | 1.467313  | -3.533797 |
|                                              |                             | H         | -5.804914 | 3.918708  | -2.457242 |
|                                              |                             | C         | -5.197251 | 3.010348  | -2.438230 |
|                                              |                             | H         | -6.169443 | -3.605408 | -2.367230 |
|                                              |                             | C         | -3.648663 | 0.686403  | -2.376952 |
|                                              |                             | H         | -5.798709 | -1.222393 | -1.804642 |
|                                              |                             | H         | -3.039612 | -0.221759 | -2.355322 |
|                                              |                             | C         | -5.495596 | -3.341072 | -1.548099 |
|                                              |                             | C         | -5.162371 | 2.225949  | -1.278912 |
|                                              |                             | C         | -5.290648 | -1.997031 | -1.225307 |
|                                              |                             | H         | -4.997343 | -5.394702 | -1.082435 |
|                                              |                             | C         | -4.389382 | 1.055382  | -1.238065 |
|                                              | C                           | -4.837768 | -4.343689 | -0.828001 |           |
|                                              | H                           | -5.740472 | 2.527780  | -0.402650 |           |
|                                              | H                           | -1.039499 | 1.474510  | -1.112703 |           |
|                                              | H                           | -2.182730 | 2.575281  | -0.738432 |           |
|                                              | C                           | -4.423490 | -1.641914 | -0.176732 |           |
|                                              | N                           | -1.412054 | 2.034630  | -0.341347 |           |
|                                              | C                           | -3.968076 | -3.997227 | 0.210523  |           |
|                                              | P                           | -4.135803 | 0.106942  | 0.323035  |           |
|                                              | C                           | -3.755447 | -2.653742 | 0.532503  |           |
|                                              | H                           | -3.442800 | -4.775842 | 0.769301  |           |
|                                              | C                           | -0.354610 | 2.925268  | 0.198408  |           |
|                                              | H                           | 1.226868  | 1.455701  | 0.232531  |           |
|                                              | H                           | -7.071628 | -0.520285 | 0.178115  |           |
|                                              | C                           | -5.594477 | 0.548590  | 1.357686  |           |
|                                              | Pt                          | -2.120925 | 0.592955  | 1.232813  |           |
|                                              | C                           | -6.896511 | 0.124922  | 1.041294  |           |
|                                              | H                           | -3.058189 | -2.381074 | 1.327553  |           |
|                                              | H                           | -0.841613 | 3.625885  | 0.893755  |           |
|                                              | C                           | 0.686500  | 2.105414  | 0.944968  |           |
|                                              | H                           | -4.374486 | 1.676666  | 2.738248  |           |
|                                              | C                           | -5.390343 | 1.362812  | 2.483305  |           |
|                                              | H                           | 1.430758  | 2.779894  | 1.397275  |           |
|                                              | C                           | -7.976904 | 0.517106  | 1.834294  |           |
|                                              | H                           | -8.985584 | 0.179767  | 1.582171  |           |
|                                              | H                           | -2.466914 | -0.386312 | 2.401710  |           |
|                                              | S                           | -0.069294 | 1.082468  | 2.288268  |           |
|                                              | C                           | -6.475327 | 1.755061  | 3.274437  |           |
|                                              | C                           | -7.768249 | 1.334573  | 2.951348  |           |
|                                              | H                           | -6.305260 | 2.386020  | 4.150460  |           |
|                                              | H                           | -8.614985 | 1.637675  | 3.572756  |           |
|                                              | H                           | 0.113413  | 3.510371  | -0.616702 |           |
| Zero-point correction=                       | 0.371639 (Hartree/Particle) |           |           |           |           |
| Thermal correction to Energy=                | 0.395111                    |           |           |           |           |
| Thermal correction to Enthalpy=              | 0.396055                    |           |           |           |           |
| Thermal correction to Gibbs Free Energy=     | 0.314782                    |           |           |           |           |
| Sum of electronic and zero-point Energies=   | -1688.058843                |           |           |           |           |
| Sum of electronic and thermal Energies=      | -1688.035371                |           |           |           |           |
| Sum of electronic and thermal Enthalpies=    | -1688.034427                |           |           |           |           |
| Sum of electronic and thermal Free Energies= | -1688.115700                |           |           |           |           |

### *trans-5*

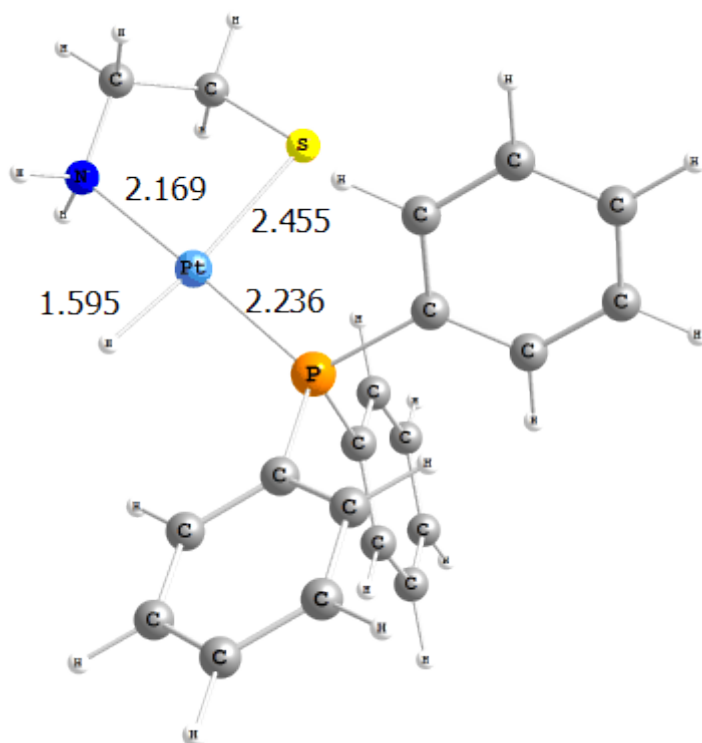

|                                              |                             |
|----------------------------------------------|-----------------------------|
| Zero-point correction=                       | 0.371411 (Hartree/Particle) |
| Thermal correction to Energy=                | 0.394787                    |
| Thermal correction to Enthalpy=              | 0.395731                    |
| Thermal correction to Gibbs Free Energy=     | 0.315228                    |
| Sum of electronic and zero-point Energies=   | -1688.055062                |
| Sum of electronic and thermal Energies=      | -1688.031686                |
| Sum of electronic and thermal Enthalpies=    | -1688.030741                |
| Sum of electronic and thermal Free Energies= | -1688.111245                |

|    |           |           |           |
|----|-----------|-----------|-----------|
| H  | -8.219258 | -2.726137 | 2.491255  |
| H  | -6.722181 | -2.714647 | 0.492538  |
| C  | -7.196700 | -2.348677 | 2.573688  |
| C  | -6.357506 | -2.342014 | 1.453228  |
| H  | -7.374355 | -1.861452 | 4.674097  |
| C  | -6.723778 | -1.865148 | 3.795761  |
| H  | -2.141683 | -5.731284 | 3.465488  |
| C  | -5.055837 | -1.849085 | 1.554395  |
| H  | -3.538604 | -3.692171 | 3.273882  |
| H  | -4.409572 | -1.822501 | 0.674511  |
| C  | -1.663578 | -4.760687 | 3.309584  |
| C  | -5.414577 | -1.382384 | 3.903727  |
| C  | -2.452342 | -3.610055 | 3.200134  |
| H  | 0.342567  | -5.569055 | 3.305759  |
| C  | -4.570287 | -1.369907 | 2.782809  |
| C  | -0.272082 | -4.668989 | 3.220575  |
| H  | -5.056404 | -1.012872 | 4.866127  |
| H  | -0.849410 | 1.009798  | -1.039342 |
| H  | -2.067154 | 2.098305  | -0.952083 |
| C  | -1.849294 | -2.359678 | 2.994645  |
| N  | -1.298004 | 1.689641  | -0.418682 |
| C  | 0.331828  | -3.422170 | 3.019741  |
| P  | -2.820859 | -0.798455 | 2.878265  |
| C  | -0.448595 | -2.270439 | 2.901817  |
| H  | 1.419987  | -3.344957 | 2.949822  |
| C  | -0.315779 | 2.732992  | -0.010221 |
| H  | 1.279627  | 1.371489  | 0.504780  |
| H  | -2.266159 | -1.925063 | 5.587991  |
| C  | -2.673867 | -0.061464 | 4.555443  |
| Pt | -2.082819 | 0.524388  | 1.233382  |
| C  | -2.416608 | -0.848028 | 5.690204  |
| H  | 0.021764  | -1.295639 | 2.739783  |
| H  | -0.884891 | 3.548388  | 0.461075  |
| C  | 0.671045  | 2.154838  | 0.992760  |
| H  | -3.010313 | 1.942723  | 3.814378  |
| C  | -2.847063 | 1.324315  | 4.699302  |
| H  | 1.364017  | 2.948054  | 1.315772  |
| C  | -2.344024 | -0.255373 | 6.953642  |
| H  | -2.137543 | -0.873387 | 7.831230  |
| H  | -3.281112 | 0.031075  | 0.304016  |
| S  | -0.193503 | 1.481258  | 2.474143  |
| C  | -2.778092 | 1.911621  | 5.965062  |
| C  | -2.527460 | 1.124304  | 7.092984  |
| H  | -2.906758 | 2.992002  | 6.067038  |
| H  | -2.465213 | 1.587191  | 8.081357  |
| H  | 0.200997  | 3.134460  | -0.902685 |



**cis-6**

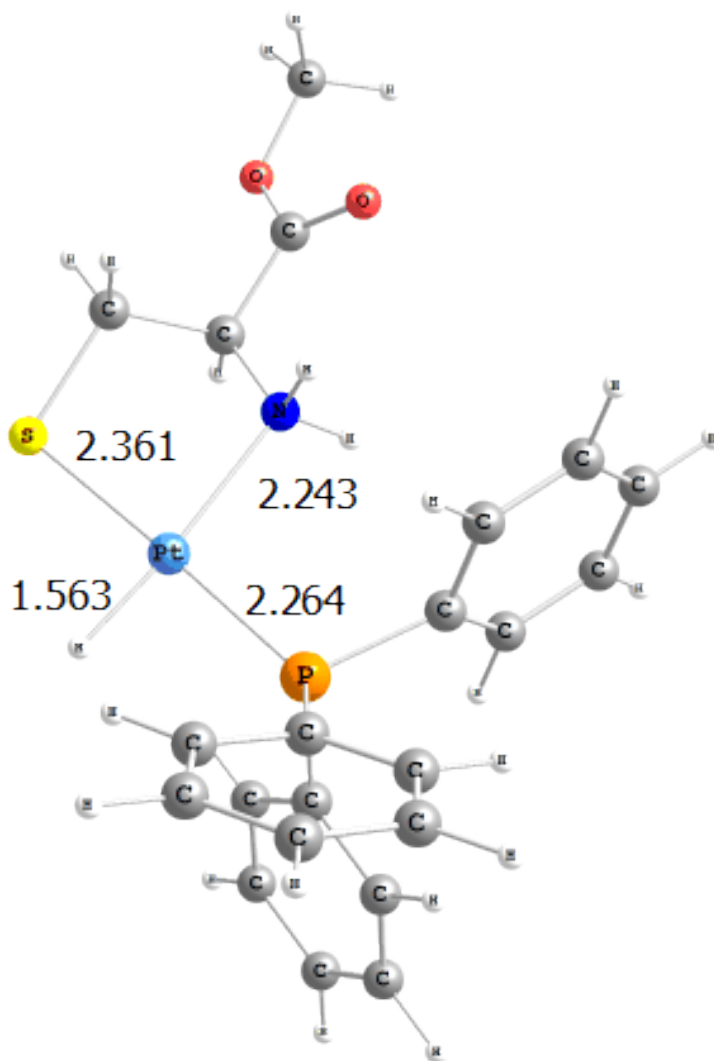

|    |           |           |           |
|----|-----------|-----------|-----------|
| H  | -4.386313 | 3.620458  | -4.127767 |
| H  | -2.932182 | 1.590948  | -4.131266 |
| C  | -4.394248 | 2.939126  | -3.273495 |
| C  | -3.579413 | 1.800396  | -3.276092 |
| H  | -5.854935 | 4.087202  | -2.165543 |
| C  | -5.214890 | 3.201171  | -2.173106 |
| H  | -5.920955 | -3.455370 | -2.591478 |
| C  | -3.584552 | 0.933465  | -2.182007 |
| H  | -5.677024 | -1.100090 | -1.863994 |
| H  | -2.939867 | 0.050020  | -2.186213 |
| C  | -5.307423 | -3.219214 | -1.718170 |
| C  | -5.223161 | 2.333024  | -1.074660 |
| C  | -5.174582 | -1.891586 | -1.302870 |
| H  | -4.756907 | -5.278907 | -1.348350 |
| C  | -4.408229 | 1.190571  | -1.069753 |
| H  | 2.422997  | 4.909079  | -1.595442 |
| O  | 0.128902  | 3.540716  | -1.747784 |
| C  | -4.654032 | -4.240967 | -1.021399 |
| H  | -5.865566 | 2.548451  | -0.217886 |
| H  | -1.163883 | 1.708086  | -0.844029 |
| H  | -2.295000 | 2.758243  | -0.363528 |
| C  | 1.726149  | 5.559735  | -1.045191 |
| C  | -4.384916 | -1.572904 | -0.184003 |
| C  | 0.223255  | 3.809649  | -0.572361 |
| H  | 2.278450  | 6.314907  | -0.472991 |
| N  | -1.528525 | 2.181203  | -0.010936 |
| C  | -3.860748 | -3.929858 | 0.087194  |
| P  | -4.197887 | 0.149872  | 0.436448  |
| O  | 0.977490  | 4.803126  | -0.088569 |
| C  | -3.720231 | -2.602644 | 0.502282  |
| H  | -3.338819 | -4.722930 | 0.628488  |
| C  | -0.460952 | 3.032953  | 0.546013  |
| H  | 1.088083  | 1.526185  | 0.586619  |
| H  | -7.092906 | -0.560043 | 0.090292  |
| C  | -5.719469 | 0.465367  | 1.423522  |
| Pt | -2.244391 | 0.651732  | 1.465885  |
| C  | -6.986874 | 0.023545  | 1.007029  |
| H  | -3.081863 | -2.356081 | 1.353331  |
| H  | -0.913597 | 3.740462  | 1.257300  |
| C  | 0.558682  | 2.174187  | 1.307819  |
| H  | -4.614567 | 1.527341  | 2.946193  |
| C  | -5.603385 | 1.199163  | 2.614859  |
| H  | 1.305578  | 2.833779  | 1.773305  |
| C  | -8.120235 | 0.319045  | 1.767181  |
| H  | -9.101535 | -0.031308 | 1.436937  |
| H  | -2.611136 | -0.393634 | 2.568933  |
| S  | -0.246117 | 1.156050  | 2.618344  |
| C  | -6.741332 | 1.494473  | 3.373074  |
| C  | -7.999432 | 1.056755  | 2.950787  |
| H  | -6.640107 | 2.063462  | 4.300667  |
| H  | -8.887581 | 1.284291  | 3.546083  |
| H  | 1.053972  | 6.042827  | -1.770874 |

Zero-point correction= 0.414361 (Hartree/Particle)  
 Thermal correction to Energy= 0.442463  
 Thermal correction to Enthalpy= 0.443407  
 Thermal correction to Gibbs Free Energy= 0.350559  
 Sum of electronic and zero-point Energies= -1915.733121  
 Sum of electronic and thermal Energies= -1915.705018  
 Sum of electronic and thermal Enthalpies= -1915.704074  
 Sum of electronic and thermal Free Energies= -1915.796922

### *trans-6*

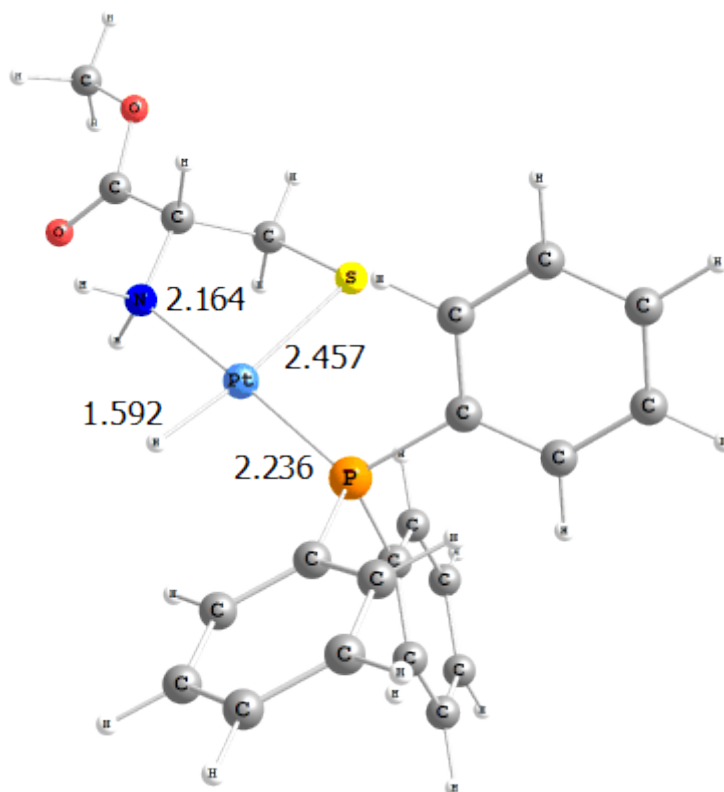

Zero-point correction= 0.414122 (Hartree/Particle)  
Thermal correction to Energy= 0.442133  
Thermal correction to Enthalpy= 0.443077  
Thermal correction to Gibbs Free Energy= 0.351064  
Sum of electronic and zero-point Energies= -1915.728808  
Sum of electronic and thermal Energies= -1915.700797  
Sum of electronic and thermal Enthalpies= -1915.699853  
Sum of electronic and thermal Free Energies= -1915.791866

|    |           |           |           |
|----|-----------|-----------|-----------|
| H  | -8.188667 | -2.829053 | 2.264713  |
| H  | -6.671999 | -2.516690 | 0.305577  |
| C  | -7.183438 | -2.424268 | 2.408018  |
| C  | -6.333365 | -2.248957 | 1.309740  |
| H  | -7.403651 | -2.202523 | 4.548870  |
| C  | -6.744049 | -2.073988 | 3.686827  |
| H  | -2.010796 | -5.689798 | 2.997939  |
| C  | -5.054126 | -1.720927 | 1.489830  |
| H  | -3.485769 | -3.697238 | 3.010965  |
| H  | -4.399977 | -1.563363 | 0.629704  |
| C  | -1.569769 | -4.690096 | 2.966415  |
| C  | -5.457192 | -1.556321 | 3.872609  |
| C  | -2.402569 | -3.565616 | 2.972583  |
| H  | 0.467239  | -5.415218 | 2.914418  |
| C  | -4.602341 | -1.374887 | 2.774486  |
| H  | 2.534779  | 4.813814  | -1.681961 |
| O  | 0.315870  | 3.321675  | -1.784184 |
| C  | -0.181785 | -4.535528 | 2.920200  |
| H  | -5.124590 | -1.291971 | 4.877891  |
| H  | -0.965556 | 1.601641  | -0.733327 |
| H  | -2.190447 | 2.629327  | -0.454918 |
| C  | 1.772336  | 5.504566  | -1.290718 |
| C  | -1.847046 | -2.277784 | 2.926844  |
| C  | 0.306588  | 3.772457  | -0.661861 |
| H  | 2.247837  | 6.364031  | -0.803091 |
| N  | -1.413937 | 2.152385  | 0.007371  |
| C  | 0.374645  | -3.251697 | 2.878450  |
| P  | -2.879079 | -0.752434 | 2.967064  |
| O  | 0.979836  | 4.863989  | -0.284842 |
| C  | -0.449669 | -2.124844 | 2.876821  |
| H  | 1.459815  | -3.125385 | 2.842009  |
| C  | -0.431915 | 3.140517  | 0.510978  |
| H  | 1.154324  | 1.729578  | 0.916446  |
| H  | -2.300503 | -2.146309 | 5.545178  |
| C  | -2.785488 | -0.200855 | 4.717657  |
| Pt | -2.167850 | 0.777179  | 1.498917  |
| C  | -2.502476 | -1.095162 | 5.762831  |
| H  | -0.016302 | -1.120728 | 2.839147  |
| H  | -0.975738 | 3.920397  | 1.065024  |
| C  | 0.550818  | 2.464719  | 1.478678  |
| H  | -3.210854 | 1.854985  | 4.196055  |
| C  | -3.025460 | 1.151218  | 5.010155  |
| H  | 1.238018  | 3.228427  | 1.871340  |
| C  | -2.469846 | -0.642488 | 7.084563  |
| H  | -2.242983 | -1.343361 | 7.892044  |
| H  | -3.329945 | 0.347096  | 0.498752  |
| S  | -0.334977 | 1.662843  | 2.874198  |
| C  | -2.995974 | 1.598205  | 6.333391  |
| C  | -2.719067 | 0.703576  | 7.371681  |
| H  | -3.176590 | 2.653674  | 6.551387  |
| H  | -2.687881 | 1.057055  | 8.405635  |
| H  | 1.141025  | 5.838130  | -2.128418 |

*cis-7*

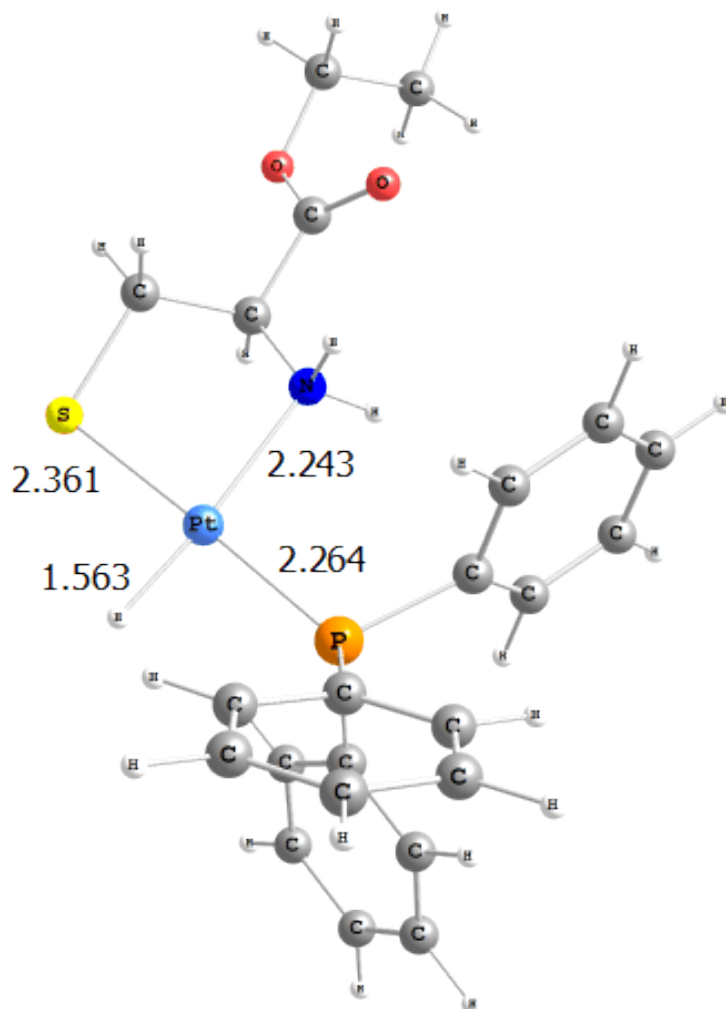

Zero-point correction= 0.442917 (Hartree/Particle)  
 Thermal correction to Energy= 0.472165  
 Thermal correction to Enthalpy= 0.473109  
 Thermal correction to Gibbs Free Energy= 0.377390  
 Sum of electronic and zero-point Energies= -1954.998156  
 Sum of electronic and thermal Energies= -1954.968907  
 Sum of electronic and thermal Enthalpies= -1954.967963  
 Sum of electronic and thermal Free Energies= -1955.063683

|    |           |           |           |
|----|-----------|-----------|-----------|
| H  | -4.367812 | 3.838756  | -3.915730 |
| H  | -2.888649 | 1.828824  | -3.992274 |
| C  | -4.380406 | 3.117467  | -3.094948 |
| C  | -3.551598 | 1.989672  | -3.138610 |
| H  | -5.872216 | 4.194245  | -1.957241 |
| C  | -5.221130 | 3.317134  | -1.996661 |
| H  | -5.850926 | -3.315990 | -2.738243 |
| C  | -3.562871 | 1.071574  | -2.087169 |
| H  | -5.641239 | -0.995835 | -1.896066 |
| H  | -2.906961 | 0.197130  | -2.122830 |
| C  | -5.251685 | -3.115844 | -1.846204 |
| C  | -5.235472 | 2.397591  | -0.940889 |
| C  | -5.138208 | -1.808336 | -1.366349 |
| H  | -4.684748 | -5.185391 | -1.567339 |
| C  | -4.406550 | 1.265829  | -0.977111 |
| H  | 2.142483  | 5.080660  | -1.435123 |
| O  | 0.109310  | 3.680169  | -1.485299 |
| C  | -4.597097 | -4.163305 | -1.189875 |
| H  | -5.893577 | 2.564517  | -0.085210 |
| H  | -1.168547 | 1.797275  | -0.682141 |
| H  | -2.315531 | 2.815430  | -0.172506 |
| H  | 1.457808  | 7.477879  | -1.865059 |
| H  | 0.055331  | 6.375046  | -1.891008 |
| C  | 1.697661  | 5.709610  | -0.648731 |
| C  | -4.367014 | -1.535823 | -0.222655 |
| C  | 0.193520  | 3.899194  | -0.297723 |
| H  | 2.500224  | 6.121674  | -0.020854 |
| N  | -1.549412 | 2.229426  | 0.165751  |
| C  | 0.836937  | 6.807650  | -1.249509 |
| C  | -3.822065 | -3.897810 | -0.056776 |
| P  | -4.205654 | 0.157218  | 0.481190  |
| O  | 0.934170  | 4.871229  | 0.244638  |
| C  | -3.700951 | -2.590626 | 0.422997  |
| H  | -3.299220 | -4.710725 | 0.453311  |
| C  | -0.497492 | 3.064821  | 0.774939  |
| H  | 1.066454  | 1.573205  | 0.770412  |
| H  | -7.087830 | -0.570404 | 0.066430  |
| H  | 0.360130  | 7.406464  | -0.458013 |
| C  | -5.743570 | 0.411627  | 1.460666  |
| Pt | -2.271440 | 0.628157  | 1.560184  |
| C  | -7.000265 | -0.026026 | 1.008877  |
| H  | -3.076618 | -2.378691 | 1.293580  |
| H  | -0.966664 | 3.736116  | 1.510276  |
| C  | 0.519290  | 2.182102  | 1.512156  |
| H  | -4.670554 | 1.418615  | 3.042316  |
| C  | -5.651233 | 1.094149  | 2.684155  |
| H  | 1.252072  | 2.826905  | 2.018806  |
| C  | -8.146544 | 0.223155  | 1.766299  |
| H  | -9.119358 | -0.123713 | 1.408398  |
| H  | -2.643262 | -0.470277 | 2.608836  |
| S  | -0.293958 | 1.096563  | 2.762309  |
| C  | -6.802041 | 1.343210  | 3.439531  |
| C  | -8.049444 | 0.909969  | 2.982255  |
| H  | -6.719282 | 1.872329  | 4.392225  |
| H  | -8.947650 | 1.101184  | 3.575248  |

### *trans-7*

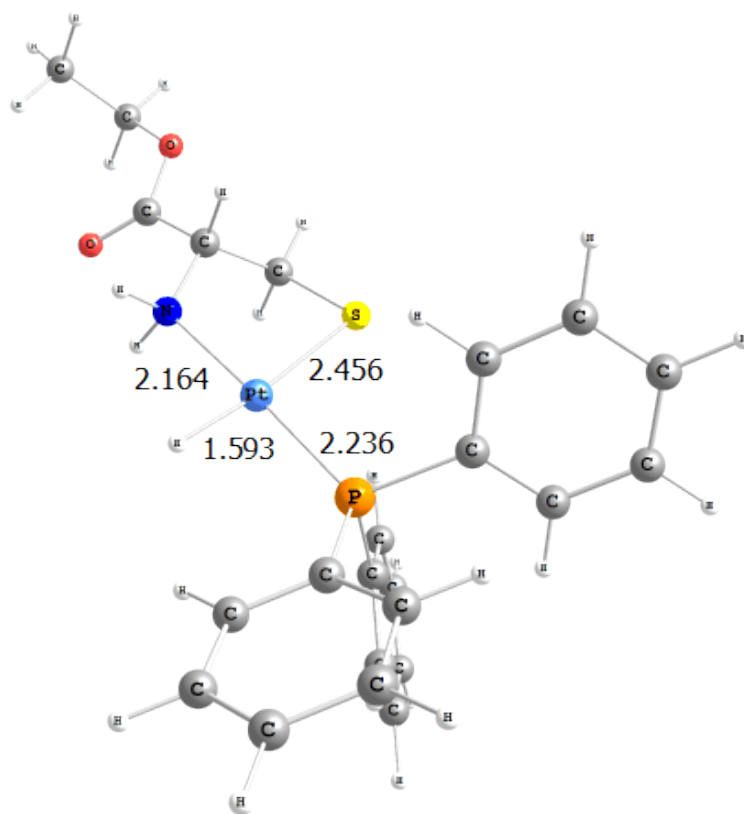

Zero-point correction= 0.442612 (Hartree/Particle)  
Thermal correction to Energy= 0.471797  
Thermal correction to Enthalpy= 0.472741  
Thermal correction to Gibbs Free Energy= 0.377659  
Sum of electronic and zero-point Energies= -1954.993861  
Sum of electronic and thermal Energies= -1954.964677  
Sum of electronic and thermal Enthalpies= -1954.963732  
Sum of electronic and thermal Free Energies= -1955.058814

|    |           |           |           |
|----|-----------|-----------|-----------|
| H  | -8.193505 | -2.786165 | 2.205842  |
| H  | -6.672029 | -2.370931 | 0.269660  |
| C  | -7.189579 | -2.387163 | 2.372604  |
| C  | -6.336788 | -2.154178 | 1.287176  |
| H  | -7.416323 | -2.275616 | 4.521310  |
| C  | -6.754569 | -2.101842 | 3.668898  |
| H  | -2.004941 | -5.664124 | 2.787296  |
| C  | -5.059276 | -1.633401 | 1.497760  |
| H  | -3.486716 | -3.680699 | 2.914562  |
| H  | -4.403067 | -1.430640 | 0.648712  |
| C  | -1.567552 | -4.662530 | 2.807621  |
| C  | -5.469297 | -1.591791 | 3.884687  |
| C  | -2.404171 | -3.543134 | 2.878235  |
| H  | 0.471699  | -5.376196 | 2.707089  |
| C  | -4.611823 | -1.352740 | 2.799800  |
| H  | 2.262407  | 5.079439  | -1.512653 |
| O  | 0.271764  | 3.617701  | -1.486236 |
| C  | -0.180337 | -4.500514 | 2.763298  |
| H  | -5.140101 | -1.378532 | 4.903150  |
| H  | -0.991227 | 1.833988  | -0.532673 |
| H  | -2.216683 | 2.841652  | -0.192889 |
| H  | 1.552851  | 7.374807  | -2.305011 |
| H  | 0.179789  | 6.236795  | -2.263677 |
| C  | 1.755819  | 5.795334  | -0.847408 |
| C  | -1.853384 | -2.252573 | 2.899360  |
| C  | 0.276873  | 4.001675  | -0.338184 |
| H  | 2.508064  | 6.312361  | -0.235198 |
| N  | -1.438848 | 2.339788  | 0.239791  |
| C  | 0.909614  | 6.775179  | -1.641570 |
| C  | 0.371388  | -3.214245 | 2.788174  |
| P  | -2.890916 | -0.735766 | 3.027715  |
| O  | 0.956936  | 5.061781  | 0.106734  |
| C  | -0.456817 | -2.091972 | 2.851150  |
| H  | 1.455923  | -3.082082 | 2.753551  |
| C  | -0.457100 | 3.298773  | 0.797592  |
| H  | 1.133352  | 1.870972  | 1.118533  |
| H  | -2.311125 | -2.275086 | 5.521289  |
| H  | 0.371092  | 7.460438  | -0.968742 |
| C  | -2.798921 | -0.285854 | 4.807321  |
| Pt | -2.187062 | 0.878699  | 1.649625  |
| C  | -2.514766 | -1.238588 | 5.799214  |
| H  | -0.027183 | -1.085652 | 2.866000  |
| H  | -1.001300 | 4.044521  | 1.396545  |
| C  | 0.528322  | 2.570449  | 1.723054  |
| H  | -3.227517 | 1.796041  | 4.405371  |
| C  | -3.041059 | 1.046669  | 5.177423  |
| H  | 1.213811  | 3.311976  | 2.158573  |
| C  | -2.483021 | -0.863014 | 7.144885  |
| H  | -2.255218 | -1.609038 | 7.910572  |
| H  | -3.350648 | 0.504864  | 0.628503  |
| S  | -0.353234 | 1.685989  | 3.070744  |
| C  | -3.012422 | 1.416516  | 6.524304  |
| C  | -2.734286 | 0.463855  | 7.509254  |
| H  | -3.194694 | 2.457366  | 6.802834  |
| H  | -2.703760 | 0.757065  | 8.561912  |

# cis-8

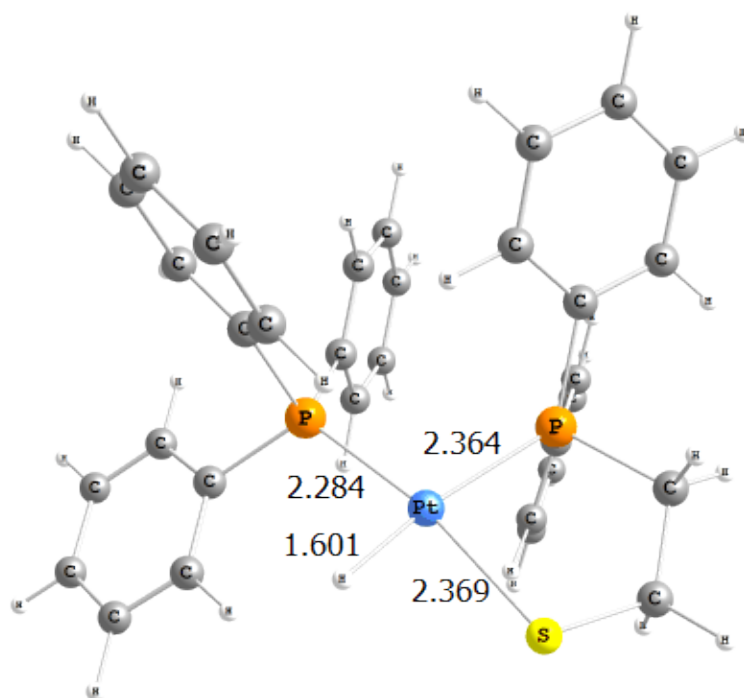

Zero-point correction= 0.526825 (Hartree/Particle)  
Thermal correction to Energy= 0.560289  
Thermal correction to Enthalpy= 0.561233  
Thermal correction to Gibbs Free Energy= 0.458695  
Sum of electronic and zero-point Energies= -2436.273147  
Sum of electronic and thermal Energies= -2436.239683  
Sum of electronic and thermal Enthalpies= -2436.238739  
Sum of electronic and thermal Free Energies= -2436.341277

|    |           |           |           |
|----|-----------|-----------|-----------|
| H  | -6.523438 | 0.136822  | -4.092588 |
| H  | -5.026084 | 2.101602  | -3.725661 |
| C  | -5.523493 | -0.005383 | -3.675038 |
| C  | -4.682976 | 1.095463  | -3.476425 |
| H  | -5.736445 | -2.148879 | -3.467699 |
| C  | -5.083980 | -1.283721 | -3.325213 |
| H  | -7.649406 | 1.952706  | -1.262901 |
| C  | -3.412333 | 0.916983  | -2.931450 |
| H  | -2.770710 | 1.784952  | -2.764829 |
| H  | -6.624608 | 4.219295  | -1.454669 |
| C  | -3.803954 | -1.467470 | -2.790548 |
| C  | -6.642123 | 2.133750  | -0.878890 |
| C  | -6.066005 | 3.401227  | -0.992475 |
| C  | -2.953480 | -0.369668 | -2.593928 |
| H  | -3.474551 | -2.473339 | -2.529133 |
| H  | -6.387016 | 0.095020  | -0.239066 |
| H  | -3.883539 | -4.787992 | -0.177353 |
| H  | -1.328950 | -0.053417 | -4.724711 |
| C  | -5.930970 | 1.084132  | -0.288639 |
| H  | 0.200831  | 1.141835  | -6.250528 |
| H  | -6.189316 | -5.090262 | 0.741607  |
| H  | -1.242395 | -2.335030 | -4.163676 |
| C  | -4.417259 | -3.942889 | 0.264955  |
| C  | -4.763830 | 3.614452  | -0.525879 |
| H  | -4.298016 | 4.598169  | -0.625751 |
| H  | 0.296631  | 0.305729  | 0.260927  |
| C  | -5.704561 | -4.111390 | 0.781983  |
| H  | -2.788164 | -2.567474 | -0.068068 |
| C  | -0.456051 | 0.457062  | -4.312759 |
| C  | -3.799873 | -2.689965 | 0.317697  |
| C  | 0.402139  | 1.140685  | -5.176110 |
| C  | -4.632829 | 1.293912  | 0.197662  |
| C  | -6.366488 | -3.025681 | 1.366796  |
| C  | -4.047499 | 2.567435  | 0.056757  |
| C  | -0.852605 | -2.880240 | -3.302004 |
| H  | -7.366644 | -3.155775 | 1.788140  |
| H  | -0.501421 | -4.678976 | -4.441983 |
| P  | -1.308117 | -0.507960 | -1.777083 |
| C  | -4.463126 | -1.589286 | 0.879815  |
| C  | -0.216172 | 0.446711  | -2.926001 |
| C  | -5.748309 | -1.774065 | 1.421993  |
| Pt | -1.291474 | 0.165208  | 0.405774  |
| C  | -0.436649 | -4.203469 | -3.459911 |
| H  | -3.015574 | 2.726131  | 0.382822  |
| C  | 1.510609  | 1.826316  | -4.667384 |
| H  | 2.180541  | 2.363916  | -5.343470 |
| C  | -0.779760 | -2.256852 | -2.044082 |
| P  | -3.577649 | 0.012907  | 0.988442  |
| H  | -6.270729 | -0.940070 | 1.896851  |
| C  | 0.891971  | 1.145208  | -2.423680 |
| C  | 1.750870  | 1.827843  | -3.291258 |
| C  | 0.063629  | -4.918194 | -2.364871 |
| C  | -0.270310 | -2.977610 | -0.952096 |
| H  | 1.073469  | 1.159694  | -1.347753 |
| H  | 2.608676  | 2.368621  | -2.883569 |
| H  | -0.204389 | -2.491348 | 0.025017  |
| C  | -3.659333 | 0.396148  | 2.810254  |
| H  | -4.683859 | 0.700529  | 3.083629  |
| C  | 0.148308  | -4.302815 | -1.113336 |
| S  | -0.920272 | 1.047703  | 2.572429  |
| H  | -2.930167 | 2.439468  | 2.810728  |
| H  | -3.429226 | -0.556867 | 3.312977  |
| C  | -2.622682 | 1.448784  | 3.184815  |
| H  | 0.543634  | -4.852384 | -0.255369 |
| H  | -2.553451 | 1.527466  | 4.281803  |
| H  | 0.389950  | -5.953861 | -2.490634 |

# *trans-8*

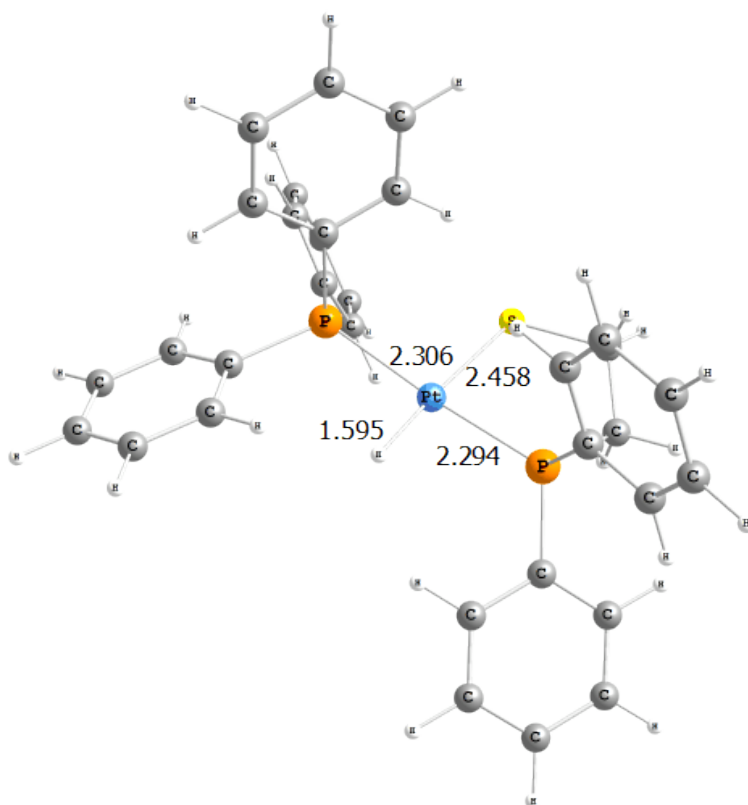

Zero-point correction= 0.525963 (Hartree/Particle)  
Thermal correction to Energy= 0.559942  
Thermal correction to Enthalpy= 0.560886  
Thermal correction to Gibbs Free Energy= 0.453876  
Sum of electronic and zero-point Energies= -2436.271847  
Sum of electronic and thermal Energies= -2436.237869  
Sum of electronic and thermal Enthalpies= -2436.236924  
Sum of electronic and thermal Free Energies= -2436.343934

|    |           |           |           |
|----|-----------|-----------|-----------|
| H  | 2.616789  | -2.290589 | -5.242008 |
| H  | 0.585132  | -0.859870 | -4.992358 |
| C  | 2.314827  | -1.933795 | -4.253879 |
| C  | 1.175851  | -1.132177 | -4.113897 |
| H  | 3.947877  | -2.911110 | -3.224799 |
| C  | 3.060330  | -2.281041 | -3.124629 |
| H  | -6.901427 | 3.452335  | -0.065328 |
| C  | 0.782341  | -0.686515 | -2.851104 |
| H  | -0.119343 | -0.080430 | -2.739206 |
| H  | -5.207264 | 5.280869  | -0.165122 |
| C  | 2.676346  | -1.824698 | -1.858707 |
| C  | -5.840701 | 3.224960  | 0.069164  |
| C  | -4.890381 | 4.249812  | 0.012155  |
| C  | 1.533232  | -1.023636 | -1.712032 |
| H  | 3.270622  | -2.099008 | -0.985269 |
| H  | -6.189398 | 1.112945  | 0.327060  |
| H  | -5.086215 | -3.020991 | -2.842077 |
| H  | 2.790947  | 1.238515  | -1.902675 |
| C  | -5.438205 | 1.905542  | 0.293492  |
| H  | 3.573431  | 3.589197  | -1.806389 |
| H  | -7.230137 | -3.629613 | -1.719094 |
| H  | 3.754129  | 0.121591  | 0.983031  |
| C  | -5.322932 | -2.615055 | -1.855343 |
| C  | -3.534218 | 3.950343  | 0.173963  |
| H  | -2.785283 | 4.744754  | 0.122540  |
| H  | -1.560540 | -0.457125 | -1.172419 |
| C  | -6.523433 | -2.957764 | -1.225194 |
| H  | -3.464294 | -1.512690 | -1.699025 |
| C  | 2.474958  | 1.878399  | -1.076289 |
| C  | -4.414442 | -1.763065 | -1.222438 |
| C  | 2.916514  | 3.205330  | -1.021493 |
| C  | -4.077762 | 1.598598  | 0.459398  |
| C  | -6.813531 | -2.446560 | 0.043488  |
| C  | -3.126292 | 2.631243  | 0.390838  |
| C  | 3.356854  | -0.781580 | 1.452063  |
| H  | -7.746475 | -2.717342 | 0.544456  |
| H  | 5.144184  | -1.136270 | 2.610883  |
| P  | 1.001289  | -0.356691 | -0.079975 |
| C  | -4.704136 | -1.235007 | 0.046700  |
| C  | 1.627291  | 1.376451  | -0.077321 |
| C  | -5.909679 | -1.589264 | 0.677680  |
| Pt | -1.256591 | -0.370076 | 0.390569  |
| C  | 4.138510  | -1.489479 | 2.368709  |
| H  | -2.064185 | 2.393516  | 0.496037  |
| C  | 2.520247  | 4.034969  | 0.030678  |
| H  | 2.865379  | 5.071500  | 0.070760  |
| C  | 2.060937  | -1.224297 | 1.140787  |
| P  | -3.492970 | -0.107376 | 0.829188  |
| H  | -6.151002 | -1.202057 | 1.669958  |
| C  | 1.228799  | 2.214290  | 0.980726  |
| C  | 1.679527  | 3.534685  | 1.032197  |
| C  | 3.632554  | -2.642059 | 2.979316  |
| C  | 1.553434  | -2.375113 | 1.764375  |
| H  | 0.568225  | 1.822233  | 1.760416  |
| H  | 4.243495  | -3.191748 | 3.700150  |
| H  | 1.368277  | 4.178190  | 1.859330  |
| H  | 0.531795  | -2.698708 | 1.553230  |
| C  | -3.744265 | -0.271170 | 2.661469  |
| H  | -4.710052 | 0.174404  | 2.955266  |
| C  | 2.340585  | -3.082432 | 2.676517  |
| S  | -0.928434 | -0.260901 | 2.824026  |
| H  | -2.608955 | 1.481684  | 3.244094  |
| H  | -3.767319 | -1.351954 | 2.875484  |
| C  | -2.567986 | 0.387663  | 3.381615  |
| H  | 1.935206  | -3.972664 | 3.163561  |
| H  | -2.643488 | 0.195208  | 4.463682  |

**cis-9**

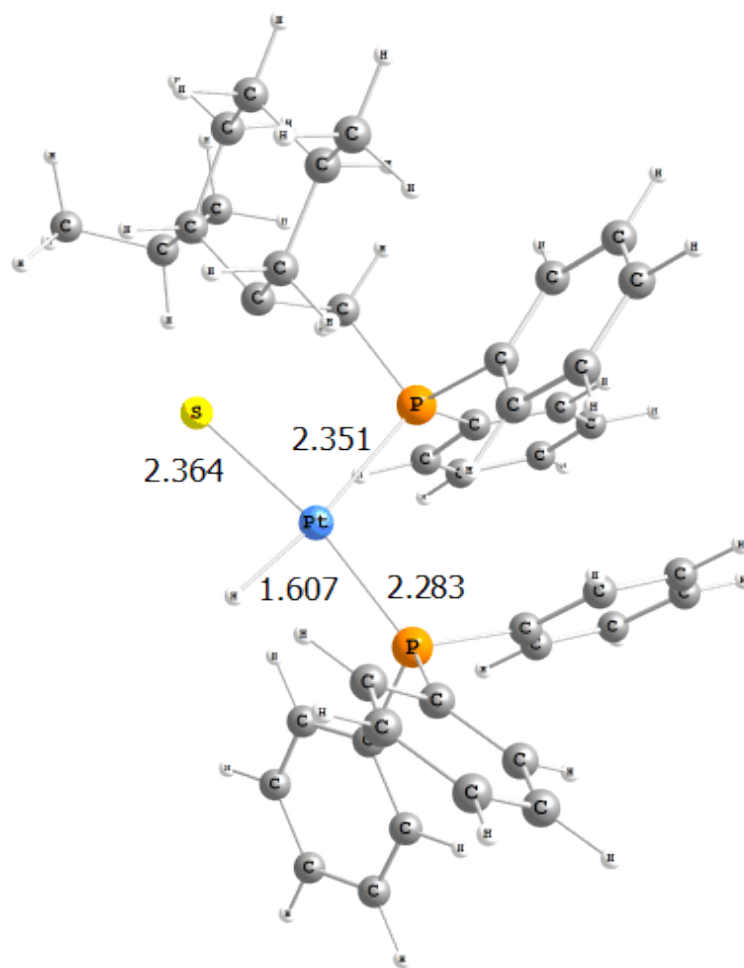

Zero-point correction= 0.761561 (Hartree/Particle)  
 Thermal correction to Energy= 0.805028  
 Thermal correction to Enthalpy= 0.805972  
 Thermal correction to Gibbs Free Energy= 0.682578  
 Sum of electronic and zero-point Energies= -2788.441544  
 Sum of electronic and thermal Energies= -2788.398076  
 Sum of electronic and thermal Enthalpies= -2788.397132  
 Sum of electronic and thermal Free Energies= -2788.520527

|    |           |           |           |
|----|-----------|-----------|-----------|
| H  | 2.630534  | -3.916791 | -5.203511 |
| H  | 2.158852  | -1.524830 | -4.664645 |
| C  | 2.264933  | -3.638719 | -4.211600 |
| H  | -5.842807 | 1.393875  | -4.008099 |
| H  | -4.218775 | 2.056840  | -4.319522 |
| H  | 2.251229  | -5.673503 | -3.471554 |
| H  | -4.416175 | 0.326993  | -3.936527 |
| C  | 2.000924  | -2.299555 | -3.910119 |
| C  | -4.784927 | 1.338708  | -3.701721 |
| H  | -2.801765 | -2.992693 | -4.196184 |
| C  | 2.053179  | -4.623512 | -3.241000 |
| H  | -5.280350 | -3.302663 | -4.173131 |
| C  | -3.385303 | -2.696459 | -3.320908 |
| C  | -4.773159 | -2.867605 | -3.308242 |
| H  | -6.251793 | 3.088639  | -2.083453 |
| H  | -4.667112 | 3.797398  | -2.433465 |
| C  | 1.527833  | -1.942236 | -2.643886 |
| C  | -4.617889 | 1.650885  | -2.213749 |
| C  | -5.179124 | 3.025172  | -1.829262 |
| C  | 1.582567  | -4.270150 | -1.973891 |
| H  | 1.311095  | -0.896697 | -2.412843 |
| H  | -2.584907 | 2.353478  | -2.353084 |
| H  | -5.181367 | 0.883961  | -1.650676 |
| H  | -1.658607 | -1.970188 | -2.238305 |
| C  | -2.739073 | -2.133041 | -2.217531 |
| C  | -5.513544 | -2.467996 | -2.190533 |
| H  | -6.599843 | -2.587746 | -2.180986 |
| H  | -2.696658 | 0.625536  | -2.099319 |
| C  | 1.318858  | -2.924386 | -1.660244 |
| H  | 1.401763  | -5.052666 | -1.234004 |
| C  | -3.143016 | 1.582861  | -1.794654 |
| C  | -4.970806 | 3.317429  | -0.341082 |
| H  | -5.342179 | 4.327814  | -0.101004 |
| C  | -3.471813 | -1.740172 | -1.085752 |
| C  | -4.867518 | -1.903898 | -1.087169 |
| H  | -2.934378 | 3.925256  | -0.525900 |
| H  | -5.591941 | 2.620313  | 0.246592  |
| C  | -2.886793 | 1.821780  | -0.289238 |
| C  | -3.495700 | 3.209026  | 0.099904  |
| P  | 0.709343  | -2.384094 | -0.004057 |
| H  | -5.459420 | -1.583467 | -0.226257 |
| H  | -4.535481 | 0.549617  | 0.461418  |
| Pt | -0.321404 | -0.347664 | -0.033590 |
| S  | -1.019935 | 1.911273  | -0.041148 |
| P  | -2.576575 | -0.923876 | 0.293834  |
| C  | -3.449806 | 0.686104  | 0.583511  |
| H  | -3.791699 | 5.750365  | 1.231699  |
| H  | -2.052237 | 5.394756  | 1.067353  |
| H  | -4.283596 | -3.365114 | 1.014399  |
| C  | -2.959237 | 5.152765  | 1.643304  |
| C  | -3.269603 | 3.650679  | 1.578966  |
| H  | -5.315407 | 3.918291  | 2.341803  |
| H  | -3.261352 | 0.907840  | 1.641942  |
| H  | -2.367097 | 3.121890  | 1.927126  |
| C  | -3.794548 | -2.977091 | 1.908534  |
| C  | -2.942508 | -1.868476 | 1.825808  |
| C  | -4.415236 | 3.316850  | 2.548882  |
| H  | -4.712362 | 2.258275  | 2.514840  |
| H  | -2.798080 | 5.484475  | 2.682462  |
| H  | -4.667450 | -4.481030 | 3.186275  |
| H  | -4.108779 | 3.538868  | 3.584205  |
| C  | -4.005536 | -3.612716 | 3.136910  |
| C  | -2.281113 | -1.424172 | 2.987164  |
| H  | -1.583924 | -0.583644 | 2.921033  |
| C  | -3.366777 | -3.152595 | 4.289844  |
| C  | -2.497899 | -2.057706 | 4.210911  |
| H  | -3.535210 | -3.651835 | 5.247504  |
| H  | -1.981025 | -1.700237 | 5.105188  |
| H  | 1.155512  | 0.255094  | -0.228149 |
| C  | -0.291105 | -3.816596 | 0.587987  |
| C  | -1.165320 | -4.490209 | -0.281856 |
| C  | -0.264109 | -4.187163 | 1.942542  |
| C  | -1.974910 | -5.527318 | 0.187354  |
| H  | -1.209904 | -4.217295 | -1.336499 |
| C  | -1.076793 | -5.222533 | 2.409352  |
| H  | 0.396438  | -3.666859 | 2.638678  |
| C  | -1.928622 | -5.900437 | 1.533245  |
| H  | -2.645155 | -6.042526 | -0.505439 |
| H  | -1.049019 | -5.493249 | 3.467213  |
| H  | -2.563764 | -6.709904 | 1.901645  |
| C  | 2.182686  | -2.440442 | 1.105410  |
| C  | 3.120448  | -3.484661 | 1.044831  |
| C  | 2.338185  | -1.435300 | 2.072749  |
| C  | 4.194606  | -3.521505 | 1.936329  |

|  |   |          |           |          |
|--|---|----------|-----------|----------|
|  | H | 3.021643 | -4.272848 | 0.296566 |
|  | C | 3.410817 | -1.478926 | 2.969478 |
|  | H | 1.620293 | -0.612715 | 2.111502 |
|  | C | 4.340588 | -2.519808 | 2.902700 |
|  | H | 4.921910 | -4.335160 | 1.875054 |
|  | H | 3.521964 | -0.689329 | 3.716923 |
|  | H | 5.182511 | -2.549647 | 3.599267 |



# *trans-9*

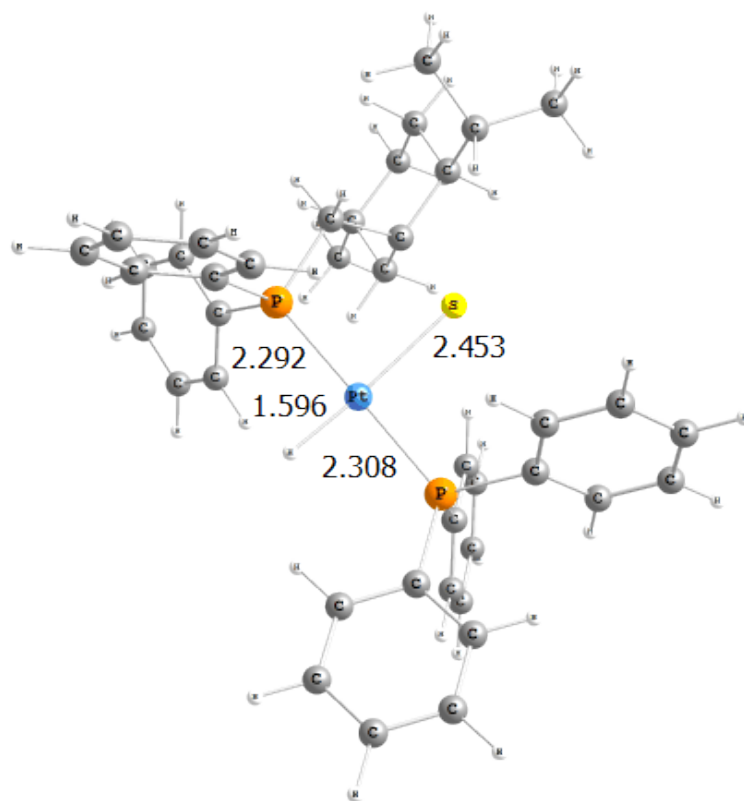

Zero-point correction= 0.760758 (Hartree/Particle)  
Thermal correction to Energy= 0.804734  
Thermal correction to Enthalpy= 0.805678  
Thermal correction to Gibbs Free Energy= 0.678415  
Sum of electronic and zero-point Energies= -2788.439120  
Sum of electronic and thermal Energies= -2788.395144  
Sum of electronic and thermal Enthalpies= -2788.394200  
Sum of electronic and thermal Free Energies= -2788.521463

|    |           |           |           |
|----|-----------|-----------|-----------|
| H  | 2.672172  | 1.074894  | -5.513242 |
| H  | 0.822771  | 2.150132  | -4.223207 |
| C  | 2.533074  | 0.840513  | -4.454541 |
| H  | -4.989353 | 1.607271  | -4.231407 |
| H  | -3.314255 | 2.213252  | -4.218846 |
| H  | 4.199374  | -0.537943 | -4.378531 |
| H  | -3.637671 | 0.482639  | -3.937578 |
| C  | 1.496136  | 1.443034  | -3.731677 |
| C  | -4.008337 | 1.501484  | -3.739268 |
| H  | -2.452043 | -3.170401 | -3.977335 |
| C  | 3.388451  | -0.063663 | -3.819579 |
| H  | -4.925980 | -3.196429 | -4.303080 |
| C  | -3.111889 | -2.774976 | -3.201107 |
| C  | -4.497811 | -2.789510 | -3.383429 |
| H  | -5.687434 | 3.261548  | -2.356352 |
| H  | -4.043140 | 3.918713  | -2.382250 |
| C  | 1.309010  | 1.139651  | -2.382364 |
| C  | -4.106458 | 1.765708  | -2.236042 |
| C  | -4.683117 | 3.148801  | -1.911608 |
| C  | 3.212012  | -0.367283 | -2.464573 |
| H  | 0.494141  | 1.600898  | -1.816782 |
| H  | -2.059342 | 2.387674  | -1.982319 |
| H  | -4.788618 | 1.006181  | -1.812106 |
| H  | -1.478847 | -2.217368 | -1.887655 |
| C  | -2.561758 | -2.246651 | -2.029306 |
| C  | -5.337192 | -2.279253 | -2.386964 |
| H  | -6.421340 | -2.287817 | -2.524697 |
| H  | -2.278579 | 0.657011  | -1.812963 |
| C  | 2.171447  | 0.232012  | -1.739717 |
| H  | 3.886161  | -1.074522 | -1.977150 |
| C  | -2.736202 | 1.625272  | -1.559238 |
| C  | -4.743543 | 3.386521  | -0.400562 |
| H  | -5.122154 | 4.401730  | -0.194390 |
| C  | -3.397150 | -1.726907 | -1.027735 |
| C  | -4.790322 | -1.750060 | -1.215759 |
| H  | -2.689284 | 3.922386  | -0.193272 |
| H  | -5.482853 | 2.694321  | 0.037080  |
| C  | -2.747319 | 1.815075  | -0.024732 |
| C  | -3.377628 | 3.210297  | 0.294972  |
| P  | 1.856297  | -0.125435 | 0.038761  |
| H  | -5.456729 | -1.352301 | -0.446353 |
| H  | -4.549983 | 0.592809  | 0.393832  |
| Pt | -0.390765 | -0.555133 | 0.343896  |
| S  | -0.966662 | 1.818324  | 0.573653  |
| P  | -2.643949 | -0.960323 | 0.458023  |
| C  | -3.493217 | 0.671937  | 0.692557  |
| H  | -3.793022 | 5.726493  | 1.444153  |
| H  | -2.064651 | 5.310395  | 1.584074  |
| H  | -4.350301 | -3.445073 | 0.838354  |
| C  | -3.068530 | 5.086363  | 1.977907  |
| C  | -3.408711 | 3.599487  | 1.805148  |
| H  | -5.549916 | 3.916884  | 2.197004  |
| H  | -3.470188 | 0.842975  | 1.776521  |
| H  | -2.600158 | 3.027796  | 2.289635  |
| C  | -3.987344 | -3.101909 | 1.808946  |
| C  | -3.183152 | -1.957095 | 1.899709  |
| C  | -4.720069 | 3.277969  | 2.540664  |
| H  | -5.036737 | 2.232022  | 2.415383  |
| H  | -3.088731 | 5.381493  | 3.040208  |
| H  | -4.949688 | -4.709765 | 2.882864  |
| H  | -4.599870 | 3.457396  | 3.621640  |
| C  | -4.323592 | -3.817422 | 2.963998  |
| C  | -2.705422 | -1.547879 | 3.158467  |
| H  | -2.046686 | -0.677378 | 3.229092  |
| C  | -3.861733 | -3.396545 | 4.213290  |
| C  | -3.050284 | -2.259355 | 4.307941  |
| H  | -4.126608 | -3.957253 | 5.113340  |
| H  | -2.675499 | -1.931799 | 5.280980  |
| H  | -0.123912 | -2.125471 | 0.238109  |
| C  | 3.072181  | -1.441531 | 0.464576  |
| C  | 2.709235  | -2.788037 | 0.301444  |
| C  | 4.370399  | -1.131035 | 0.903666  |
| C  | 3.631148  | -3.804848 | 0.561496  |
| H  | 1.693817  | -3.032302 | -0.017016 |
| C  | 5.287985  | -2.151464 | 1.170925  |
| H  | 4.669041  | -0.090171 | 1.042132  |
| C  | 4.922021  | -3.489642 | 0.997977  |
| H  | 3.335190  | -4.848951 | 0.431394  |
| H  | 6.292944  | -1.897320 | 1.517707  |
| H  | 5.640086  | -4.286302 | 1.209315  |
| C  | 2.473785  | 1.362189  | 0.920161  |
| C  | 3.398169  | 2.248566  | 0.345721  |
| C  | 1.997383  | 1.605142  | 2.218425  |
| C  | 3.847148  | 3.358838  | 1.066775  |

|  |   |          |          |           |
|--|---|----------|----------|-----------|
|  | H | 3.762020 | 2.077516 | -0.669989 |
|  | C | 2.452313 | 2.712503 | 2.937203  |
|  | H | 1.248466 | 0.938667 | 2.652470  |
|  | C | 3.377514 | 3.590462 | 2.363457  |
|  | H | 4.562350 | 4.048255 | 0.610717  |
|  | H | 2.069845 | 2.898571 | 3.943812  |
|  | H | 3.725432 | 4.462277 | 2.923644  |

# cis-10

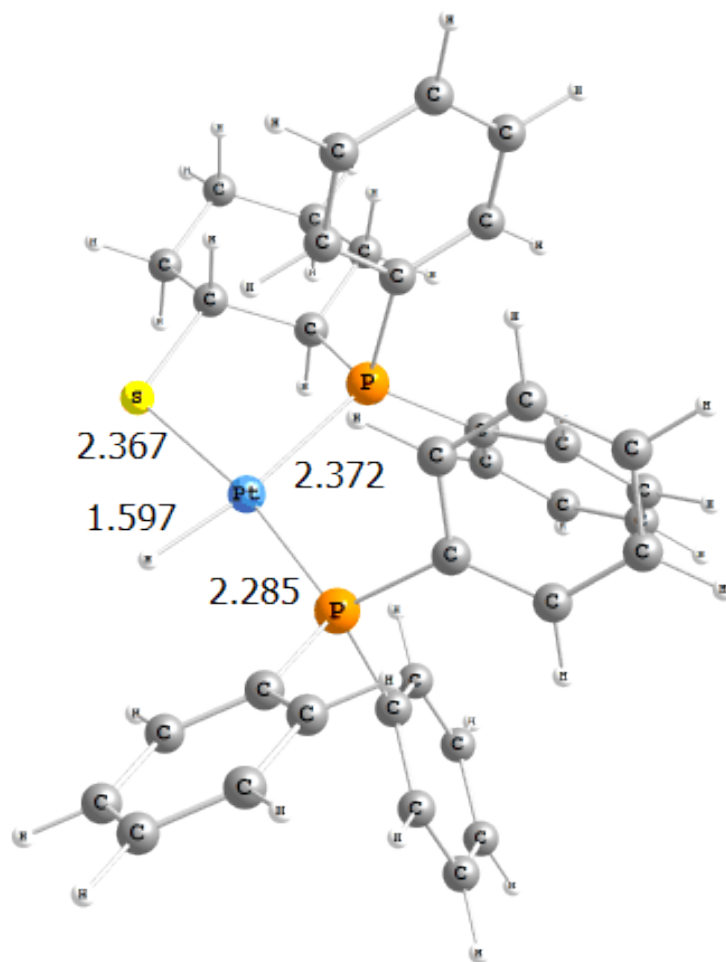

Zero-point correction= 0.621087 (Hartree/Particle)  
Thermal correction to Energy= 0.657905  
Thermal correction to Enthalpy= 0.658850  
Thermal correction to Gibbs Free Energy= 0.549554  
Sum of electronic and zero-point Energies= -2592.140331  
Sum of electronic and thermal Energies= -2592.103513  
Sum of electronic and thermal Enthalpies= -2592.102569  
Sum of electronic and thermal Free Energies= -2592.211864

|    |           |           |           |
|----|-----------|-----------|-----------|
| H  | 4.577687  | -3.940591 | -4.340232 |
| H  | 4.377442  | -1.579291 | -3.552007 |
| C  | 3.808336  | -3.667961 | -3.613199 |
| H  | 3.006130  | -5.672255 | -3.469043 |
| C  | 3.696378  | -2.344604 | -3.171313 |
| H  | -4.819941 | -2.336179 | -3.835627 |
| C  | 2.928458  | -4.637291 | -3.125962 |
| H  | -6.684381 | -3.539982 | -2.689480 |
| C  | -4.869463 | -2.360574 | -2.744072 |
| C  | -5.914878 | -3.032710 | -2.101756 |
| C  | 2.706705  | -1.991930 | -2.252641 |
| C  | 1.942422  | -4.289321 | -2.195782 |
| H  | 2.607768  | -0.953768 | -1.928584 |
| H  | -3.052698 | -1.208337 | -2.493452 |
| C  | -3.878798 | -1.722395 | -1.993425 |
| C  | -5.975631 | -3.048261 | -0.704541 |
| H  | -6.794875 | -3.564019 | -0.196899 |
| C  | 1.822838  | -2.962658 | -1.752430 |
| H  | 1.265329  | -5.058120 | -1.818760 |
| C  | -5.075223 | 3.139475  | -0.086959 |
| H  | -5.369974 | 4.195952  | 0.028950  |
| C  | -3.926892 | -1.744993 | -0.587992 |
| C  | -4.992276 | -2.401153 | 0.049255  |
| H  | -3.630273 | 3.544362  | -1.672253 |
| C  | -3.204705 | 1.592069  | -0.834612 |
| C  | -3.665718 | 3.049187  | -0.688517 |
| P  | 0.579018  | -2.456754 | -0.487785 |
| H  | -5.054507 | -2.415326 | 1.139161  |
| Pt | -0.594076 | -0.544007 | -0.917280 |
| S  | -1.500655 | 1.542533  | -1.571202 |
| P  | -2.599647 | -0.846667 | 0.312399  |
| C  | -3.291040 | 0.872033  | 0.521844  |
| H  | -2.754474 | -3.621971 | 1.318652  |
| H  | -2.567189 | 1.372971  | 1.189042  |
| C  | -2.564153 | -2.967377 | 2.169350  |
| C  | -2.532720 | -1.572570 | 1.995052  |
| H  | -2.360708 | -4.618472 | 3.536156  |
| C  | -2.342019 | -3.531362 | 3.427457  |
| C  | -2.276684 | -0.758695 | 3.113817  |
| H  | -2.231418 | 0.326850  | 3.009156  |
| C  | -2.085549 | -2.714946 | 4.532542  |
| C  | -2.057112 | -1.326368 | 4.371528  |
| H  | -1.906503 | -3.158251 | 5.515211  |
| H  | -1.859477 | -0.677926 | 5.228950  |
| H  | 0.646190  | -0.088138 | -1.813822 |
| C  | -0.476419 | -3.958538 | -0.313522 |
| C  | -1.546183 | -4.095667 | -1.213448 |
| C  | -0.291717 | -4.928412 | 0.683216  |
| C  | -2.432009 | -5.169061 | -1.106142 |
| H  | -1.700142 | -3.338144 | -1.983523 |
| C  | -1.175117 | -6.008356 | 0.785206  |
| H  | 0.527806  | -4.832541 | 1.397411  |
| C  | -2.250138 | -6.126832 | -0.101537 |
| H  | -3.275773 | -5.242646 | -1.796364 |
| H  | -1.028485 | -6.753697 | 1.571295  |
| H  | -2.948171 | -6.962726 | -0.008244 |
| C  | 1.559454  | -2.428647 | 1.071819  |
| C  | 2.719509  | -3.202419 | 1.244515  |
| C  | 1.099149  | -1.635532 | 2.134379  |
| C  | 3.396800  | -3.191728 | 2.467332  |
| H  | 3.098308  | -3.813333 | 0.421952  |
| C  | 1.772002  | -1.634932 | 3.358406  |
| H  | 0.212778  | -1.015508 | 1.998655  |
| C  | 2.921666  | -2.412652 | 3.527743  |
| H  | 4.300845  | -3.793643 | 2.591028  |
| H  | 1.395453  | -1.019622 | 4.179193  |
| H  | 3.452712  | -2.406778 | 4.483219  |
| C  | -5.154510 | 2.411845  | 1.259576  |
| C  | -4.699373 | 0.951409  | 1.129820  |
| H  | -5.801293 | 2.685981  | -0.786638 |
| H  | -6.180196 | 2.450856  | 1.663504  |
| H  | -4.507610 | 2.929676  | 1.991515  |
| H  | -5.406117 | 0.406223  | 0.480963  |
| H  | -4.722044 | 0.450882  | 2.112104  |
| H  | -2.946225 | 3.581443  | -0.041100 |
| H  | -3.895752 | 1.086869  | -1.533657 |

## *trans*-10

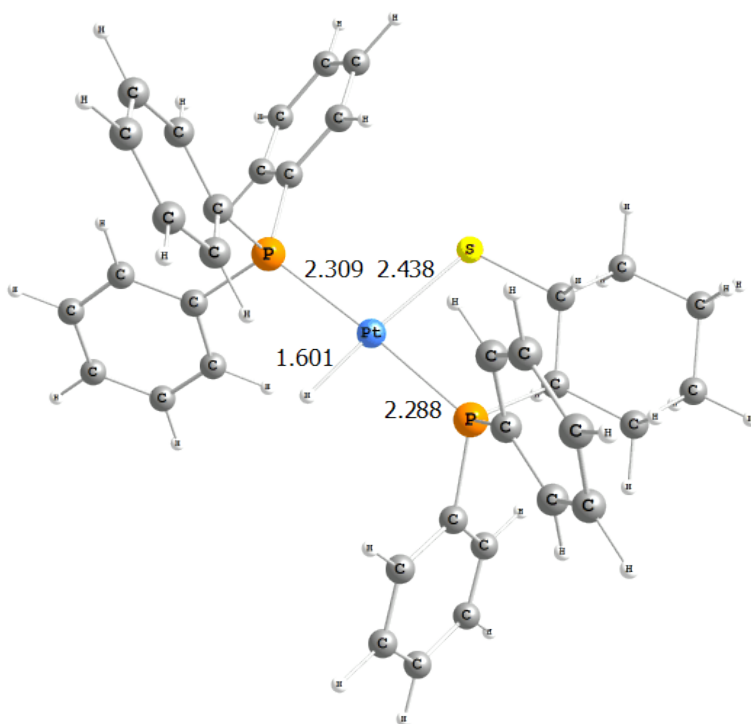

Zero-point correction= 0.619861 (Hartree/Particle)  
Thermal correction to Energy= 0.657190  
Thermal correction to Enthalpy= 0.658134  
Thermal correction to Gibbs Free Energy= 0.543890  
Sum of electronic and zero-point Energies= -2592.133163  
Sum of electronic and thermal Energies= -2592.095834  
Sum of electronic and thermal Enthalpies= -2592.094890  
Sum of electronic and thermal Free Energies= -2592.209134

|    |           |           |           |
|----|-----------|-----------|-----------|
| H  | 3.280567  | -1.112976 | -5.611940 |
| H  | 1.315262  | -2.256718 | -4.582037 |
| C  | 3.014689  | -0.915901 | -4.570092 |
| H  | 4.627979  | 0.493212  | -4.259018 |
| C  | 1.913786  | -1.557176 | -3.992739 |
| H  | -3.212939 | -0.123356 | -4.385340 |
| C  | 3.769985  | -0.015884 | -3.812322 |
| H  | -5.408836 | -1.303613 | -4.507836 |
| C  | -3.656660 | -0.52437  | -3.483361 |
| C  | -4.886947 | -1.213769 | -3.551541 |
| C  | 1.567013  | -1.301057 | -2.663788 |
| C  | 3.428839  | 0.241067  | -2.481042 |
| H  | 0.699280  | -1.789293 | -2.215008 |
| H  | -2.013701 | 0.057965  | -2.207552 |
| C  | -2.983361 | -0.444419 | -2.263237 |
| C  | -5.446823 | -1.765236 | -2.394088 |
| H  | -6.406842 | -2.285598 | -2.443245 |
| C  | 2.326196  | -0.402669 | -1.894564 |
| H  | 4.018101  | 0.954726  | -1.901085 |
| C  | -4.856341 | 3.355568  | 1.211478  |
| H  | -5.197921 | 4.276191  | 1.713892  |
| C  | -3.543787 | -0.991334 | -1.096090 |
| C  | -4.781295 | -1.652261 | -1.170619 |
| H  | -2.897752 | 4.165430  | 0.689016  |
| C  | -2.800204 | 2.007136  | 0.555501  |
| C  | -3.322725 | 3.293360  | 1.211330  |
| P  | 1.853117  | -0.127384 | -0.134824 |
| H  | -5.224489 | -2.086321 | -0.271427 |
| Pt | -0.416731 | -0.361167 | 0.217181  |
| S  | -0.946132 | 1.990577  | 0.584729  |
| P  | -2.655484 | -0.745028 | 0.492316  |
| C  | -3.423313 | 0.775824  | 1.243532  |
| H  | -2.517854 | -3.591109 | 0.011700  |
| H  | -3.052480 | 0.774045  | 2.284548  |
| C  | -2.917001 | -3.468299 | 1.021703  |
| C  | -3.130729 | -2.175609 | 1.532869  |
| H  | -3.031762 | -5.590911 | 1.386219  |
| C  | -3.201137 | -4.592423 | 1.797149  |
| C  | -3.615876 | -2.032738 | 2.841837  |
| H  | -3.774436 | -1.042099 | 3.270820  |
| C  | -3.692079 | -4.442383 | 3.099858  |
| C  | -3.894769 | -3.162155 | 3.619771  |
| H  | -3.911019 | -5.323214 | 3.708725  |
| H  | -4.272113 | -3.036108 | 4.637755  |
| H  | -0.166900 | -1.928761 | 0.006229  |
| C  | 2.867893  | -1.333706 | 0.813170  |
| C  | 4.178734  | -1.661887 | 0.430346  |
| C  | 2.322974  | -1.910957 | 1.970940  |
| C  | 4.934134  | -2.552082 | 1.197679  |
| H  | 4.611844  | -1.226808 | -0.473030 |
| C  | 3.084281  | -2.795893 | 2.740300  |
| H  | 1.295526  | -1.671750 | 2.256413  |
| C  | 4.389094  | -3.118376 | 2.355278  |
| H  | 5.951428  | -2.806153 | 0.888871  |
| H  | 2.651483  | -3.240167 | 3.640220  |
| H  | 4.980989  | -3.815645 | 2.954054  |
| C  | 2.592191  | 1.503477  | 0.272554  |
| C  | 2.138523  | 2.628793  | -0.438964 |
| C  | 3.534667  | 1.672540  | 1.298539  |
| C  | 2.634962  | 3.897428  | -0.137387 |
| H  | 1.383448  | 2.512798  | -1.218697 |
| C  | 4.023603  | 2.947575  | 1.601158  |
| H  | 3.890941  | 0.810482  | 1.865457  |
| C  | 3.578260  | 4.060373  | 0.882929  |
| H  | 2.271927  | 4.764817  | -0.694107 |
| H  | 4.756486  | 3.068497  | 2.403064  |
| H  | 3.960998  | 5.056057  | 1.121708  |
| C  | -5.464640 | 2.121554  | 1.886432  |
| C  | -4.959527 | 0.828081  | 1.232297  |
| H  | -5.220534 | 3.413293  | 0.169119  |
| H  | -6.566295 | 2.157571  | 1.844012  |
| H  | -5.189973 | 2.118906  | 2.957391  |
| H  | -5.314665 | 0.787372  | 0.188576  |
| H  | -5.383937 | -0.053396 | 1.740610  |
| H  | -2.945338 | 3.333220  | 2.248787  |
| H  | -3.128325 | 2.004938  | -0.500337 |

## cis-11-chair

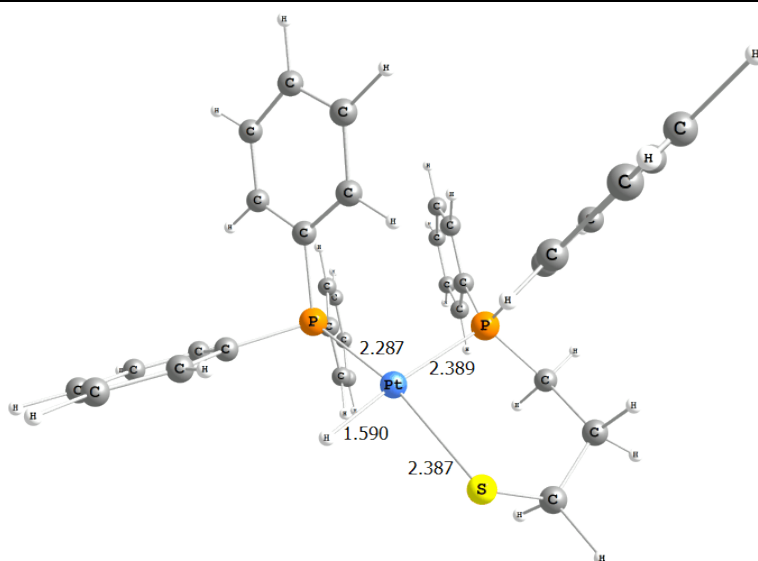

Zero-point correction= 0.555401 (Hartree/Particle)  
 Thermal correction to Energy= 0.590186  
 Thermal correction to Enthalpy= 0.591130  
 Thermal correction to Gibbs Free Energy= 0.486276  
 Sum of electronic and zero-point Energies= -2475.529151  
 Sum of electronic and thermal Energies= -2475.494366  
 Sum of electronic and thermal Enthalpies= -2475.493422  
 Sum of electronic and thermal Free Energies= -2475.598276

|    |           |           |           |
|----|-----------|-----------|-----------|
| H  | 2.703086  | 0.371822  | -5.277847 |
| H  | 1.039956  | 1.903219  | -4.217354 |
| C  | 2.425146  | 0.238421  | -4.229176 |
| C  | 1.493302  | 1.097342  | -3.634672 |
| H  | 3.715375  | -1.473711 | -3.938357 |
| C  | 2.992128  | -0.794655 | -3.479305 |
| H  | 3.607921  | -0.431243 | 5.164941  |
| C  | 1.127698  | 0.920842  | -2.299414 |
| H  | 0.382053  | 1.577729  | -1.845575 |
| H  | 3.758399  | -2.920396 | 5.340158  |
| C  | 2.635359  | -0.968575 | -2.137126 |
| C  | 2.781953  | -1.059115 | 4.821010  |
| C  | 2.866180  | -2.450438 | 4.918792  |
| C  | 1.699843  | -0.111488 | -1.537762 |
| H  | 3.085180  | -1.780723 | -1.562466 |
| H  | 1.589029  | 0.628660  | 4.229313  |
| H  | -2.186173 | 4.311696  | 3.660408  |
| H  | 4.129576  | 0.444618  | -0.086826 |
| C  | 1.639481  | -0.458950 | 4.286317  |
| H  | 5.565486  | 2.177346  | 0.950705  |
| H  | -1.798217 | 4.332877  | 6.126772  |
| H  | 3.746991  | -1.236182 | 1.687630  |
| C  | -1.837267 | 3.409909  | 4.169861  |
| C  | 1.806708  | -3.237847 | 4.460431  |
| H  | 1.870269  | -4.327236 | 4.510866  |
| H  | -1.210704 | 0.230072  | -0.823036 |
| C  | -1.623588 | 3.420243  | 5.550883  |
| H  | -1.807630 | 2.226719  | 2.355927  |
| C  | 3.700922  | 1.133619  | 0.644752  |
| C  | -1.614464 | 2.243314  | 3.430600  |
| C  | 4.508054  | 2.116941  | 1.220834  |
| C  | 0.559499  | -1.240828 | 3.839979  |
| C  | -1.191096 | 2.256195  | 6.196862  |
| C  | 0.666188  | -2.640160 | 3.920011  |
| C  | 3.139202  | -2.085360 | 1.374419  |
| H  | -1.028232 | 2.256455  | 7.277801  |
| H  | 4.533630  | -3.528810 | 2.165675  |
| P  | 1.236702  | -0.237871 | 0.244702  |
| C  | -1.166680 | 1.075783  | 4.069960  |
| C  | 2.340320  | 1.039032  | 0.988074  |
| C  | -0.965776 | 1.090504  | 5.461633  |
| Pt | -0.993650 | -0.074414 | 0.722872  |
| C  | 3.581911  | -3.383647 | 1.648808  |
| H  | -0.138335 | -3.279364 | 3.552760  |
| C  | 3.962468  | 3.030611  | 2.130623  |
| H  | 4.595033  | 3.802512  | 2.576604  |
| C  | 1.914559  | -1.881221 | 0.725963  |
| P  | -0.926150 | -0.460281 | 3.079919  |
| H  | -0.619248 | 0.189803  | 5.974617  |
| C  | 1.796785  | 1.975924  | 1.878837  |
| C  | 2.603943  | 2.964133  | 2.450819  |
| C  | 2.808889  | -4.486405 | 1.279929  |
| C  | 1.127301  | -2.995027 | 0.378096  |
| H  | 0.734391  | 1.937710  | 2.119787  |
| H  | 3.159664  | -5.499150 | 1.494663  |
| H  | 2.162320  | 3.684227  | 3.144441  |
| H  | 0.157724  | -2.839015 | -0.103077 |
| C  | -2.311585 | -1.529830 | 3.685524  |
| C  | 1.575535  | -4.288694 | 0.648406  |
| S  | -3.365255 | 0.199754  | 0.739813  |
| H  | -3.935951 | -2.045983 | 1.500808  |
| C  | -4.107741 | -1.029665 | 1.895398  |
| H  | 0.958129  | -5.145711 | 0.367266  |
| H  | -5.190634 | -0.842049 | 1.815360  |
| C  | -3.710065 | -0.979765 | 3.371822  |
| H  | -2.189105 | -2.517653 | 3.211542  |
| H  | -2.175440 | -1.663640 | 4.771137  |
| H  | -4.432454 | -1.592834 | 3.942182  |
| H  | -3.810027 | 0.050444  | 3.753421  |

## *trans*-11-chair

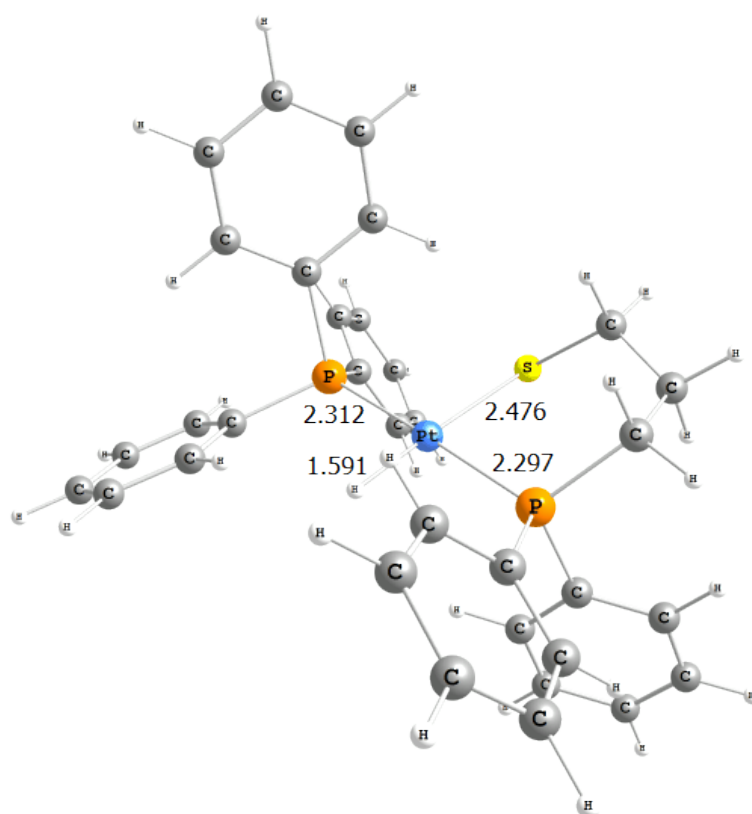

Zero-point correction= 0.554762 (Hartree/Particle)  
 Thermal correction to Energy= 0.589935  
 Thermal correction to Enthalpy= 0.590879  
 Thermal correction to Gibbs Free Energy= 0.481227  
 Sum of electronic and zero-point Energies= -2475.529625  
 Sum of electronic and thermal Energies= -2475.494452  
 Sum of electronic and thermal Enthalpies= -2475.493508  
 Sum of electronic and thermal Free Energies= -2475.603160

|    |            |           |           |
|----|------------|-----------|-----------|
| H  | 2.711791   | -0.591053 | -5.230165 |
| H  | 0.818715   | 0.892278  | -4.557683 |
| C  | 2.413968   | -0.522438 | -4.180634 |
| C  | 1.353548   | 0.308828  | -3.803831 |
| H  | 3.912066   | -1.926393 | -3.496787 |
| C  | 3.086237   | -1.270198 | -3.210044 |
| H  | -7.363824  | 1.938383  | -1.466908 |
| C  | 0.964835   | 0.387966  | -2.464871 |
| H  | 0.121603   | 1.018048  | -2.174674 |
| H  | -6.126626  | 3.800969  | -2.573187 |
| C  | 2.706466   | -1.184417 | -1.866651 |
| C  | -6.300720  | 2.088705  | -1.261630 |
| C  | -5.606698  | 3.131875  | -1.882601 |
| C  | 1.641142   | -0.353825 | -1.482235 |
| H  | 3.242745   | -1.771101 | -1.118613 |
| H  | -6.1888631 | 0.415677  | 0.095322  |
| H  | -4.044040  | -4.282886 | -0.459413 |
| H  | 3.207140   | 1.636291  | -0.987142 |
| C  | -5.637406  | 1.230871  | -0.379230 |
| H  | 4.448767   | 3.596101  | -0.112832 |
| H  | -6.033773  | -4.717770 | 0.983884  |
| H  | 3.830693   | -0.651969 | 1.510915  |
| C  | -4.420640  | -3.501495 | 0.205518  |
| C  | -4.244135  | 3.311709  | -1.623239 |
| H  | -3.695181  | 4.121863  | -2.110207 |
| H  | -1.354163  | 0.465411  | -0.795786 |
| C  | -5.535432  | -3.745431 | 1.014648  |
| H  | -2.892817  | -2.078156 | -0.363530 |
| C  | 3.035296   | 1.969571  | 0.038190  |
| C  | -3.776831  | -2.263279 | 0.251925  |
| C  | 3.736690   | 3.075237  | 0.532636  |
| C  | -4.268946  | 1.404914  | -0.117111 |
| C  | -6.005808  | -2.744338 | 1.868979  |
| C  | -3.575735  | 2.448974  | -0.750363 |
| C  | 3.232708   | -1.560556 | 1.612677  |
| H  | -6.872023  | -2.930984 | 2.508902  |
| H  | 4.806170   | -2.654435 | 2.608581  |
| P  | 1.145800   | -0.158344 | 0.282118  |
| C  | -4.248662  | -1.248338 | 1.102241  |
| C  | 2.116339   | 1.296331  | 0.857083  |
| C  | -5.367384  | -1.500836 | 1.912270  |
| Pt | -1.108669  | 0.092414  | 0.731042  |
| C  | 3.780445   | -2.687437 | 2.232235  |
| H  | -2.505149  | 2.570589  | -0.566753 |
| C  | 3.529594   | 3.509806  | 1.844275  |
| H  | 4.078953   | 4.373492  | 2.228247  |
| C  | 1.914333   | -1.591665 | 1.132371  |
| P  | -3.361393  | 0.357182  | 1.094930  |
| H  | -5.748233  | -0.733769 | 2.589372  |
| C  | 1.906585   | 1.737909  | 2.176534  |
| C  | 2.616043   | 2.836469  | 2.664407  |
| C  | 3.016395   | -3.849824 | 2.377073  |
| C  | 1.148044   | -2.757503 | 1.289506  |
| H  | 1.188927   | 1.206112  | 2.809462  |
| H  | 3.444341   | -4.728045 | 2.867511  |
| H  | 2.451280   | 3.171417  | 3.691884  |
| H  | 0.108976   | -2.772161 | 0.951394  |
| C  | -3.797267  | 1.198036  | 2.681602  |
| C  | 1.699961   | -3.882226 | 1.906155  |
| S  | -0.780854  | -0.602692 | 3.084263  |
| H  | -1.360303  | 1.613027  | 3.942780  |
| C  | -1.733112  | 0.587941  | 4.116343  |
| H  | 1.092887   | -4.781903 | 2.033301  |
| H  | -1.477809  | 0.331631  | 5.157077  |
| C  | -3.256491  | 0.559761  | 3.967795  |
| H  | -3.398116  | 2.220025  | 2.564872  |
| H  | -4.894493  | 1.299854  | 2.716303  |
| H  | -3.701087  | 1.116642  | 4.814156  |
| H  | -3.611635  | -0.480651 | 4.056056  |

## cis-11-skew-boat

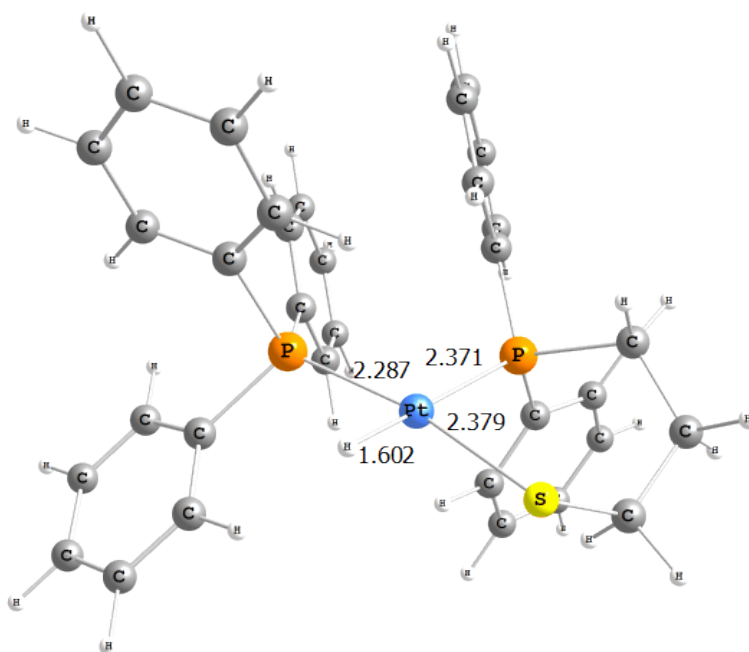

Zero-point correction= 0.555412 (Hartree/Particle)  
 Thermal correction to Energy= 0.590126  
 Thermal correction to Enthalpy= 0.591070  
 Thermal correction to Gibbs Free Energy= 0.486070  
 Sum of electronic and zero-point Energies= -2475.530524  
 Sum of electronic and thermal Energies= -2475.495810  
 Sum of electronic and thermal Enthalpies= -2475.494866  
 Sum of electronic and thermal Free Energies= -2475.599867

|    |           |           |           |
|----|-----------|-----------|-----------|
| H  | -6.456841 | -0.310277 | -4.132503 |
| H  | -5.619162 | 1.757134  | -3.000346 |
| C  | -5.515066 | -0.329822 | -3.578176 |
| C  | -5.046874 | 0.827656  | -2.946199 |
| H  | -5.147805 | -2.426405 | -3.959255 |
| C  | -4.779545 | -1.513259 | -3.485810 |
| H  | -8.312162 | 2.557545  | 1.695676  |
| C  | -3.845136 | 0.798177  | -2.238989 |
| H  | -3.482434 | 1.707490  | -1.756873 |
| H  | -7.282646 | 4.631906  | 0.770194  |
| C  | -3.575940 | -1.545802 | -2.773779 |
| C  | -7.258723 | 2.563072  | 1.404114  |
| C  | -6.680101 | 3.727394  | 0.886596  |
| C  | -3.093693 | -0.386750 | -2.150929 |
| H  | -3.021588 | -2.482044 | -2.698787 |
| H  | -6.948519 | 0.506077  | 1.971804  |
| H  | -7.461344 | -2.467497 | -1.419722 |
| H  | -1.531961 | 0.588240  | -4.015498 |
| C  | -6.489219 | 1.406772  | 1.556803  |
| H  | -0.134078 | 2.209737  | -5.250689 |
| H  | -6.229135 | -4.632872 | -1.302698 |
| H  | -0.436402 | -1.591292 | -3.648889 |
| C  | -6.526180 | -2.536661 | -0.858347 |
| C  | -5.327349 | 3.735719  | 0.532806  |
| H  | -4.866252 | 4.647867  | 0.145717  |
| H  | -0.116221 | 0.108462  | 1.026486  |
| C  | -5.833165 | -3.747565 | -0.798600 |
| H  | -6.563871 | -0.455798 | -0.300303 |
| C  | -0.747473 | 1.131501  | -3.484387 |
| C  | -6.022629 | -1.399072 | -0.218653 |
| C  | 0.036739  | 2.053451  | -4.182340 |
| C  | -5.134429 | 1.399925  | 1.182102  |
| C  | -4.620406 | -3.817134 | -0.103813 |
| C  | -4.557417 | 2.578881  | 0.683429  |
| C  | -0.291072 | -2.284972 | -2.818358 |
| H  | -4.059385 | -4.754339 | -0.066023 |
| H  | 0.629795  | -3.785208 | -4.067613 |
| P  | -1.537455 | -0.326840 | -1.165519 |
| C  | -4.818176 | -1.465520 | 0.493886  |
| C  | -0.544440 | 0.917347  | -2.108649 |
| C  | -4.115576 | -2.684208 | 0.535137  |
| Pt | -1.717152 | 0.138392  | 1.066744  |
| C  | 0.311684  | -3.522061 | -3.055525 |
| H  | -3.492509 | 2.585197  | 0.434749  |
| C  | 1.030768  | 2.776896  | -3.515906 |
| H  | 1.641542  | 3.500821  | -4.061633 |
| C  | -0.703785 | -1.932044 | -1.521997 |
| P  | -4.054211 | -0.064706 | 1.408630  |
| H  | -3.158064 | -2.738012 | 1.058671  |
| C  | 0.449325  | 1.655873  | -1.445106 |
| C  | 1.232711  | 2.576441  | -2.147429 |
| C  | 0.512949  | -4.419168 | -2.000123 |
| C  | -0.486351 | -2.831230 | -0.466550 |
| H  | 0.599813  | 1.514526  | -0.373506 |
| H  | 2.000652  | 3.144620  | -1.616432 |
| H  | -0.774866 | -2.543942 | 0.547309  |
| C  | -4.355150 | -0.591080 | 3.162568  |
| C  | 0.116261  | -4.070314 | -0.706431 |
| S  | -1.334690 | 0.704421  | 3.345960  |
| H  | -3.229483 | 2.214448  | 3.208553  |
| C  | -2.914779 | 1.449668  | 3.934632  |
| H  | 0.283957  | -4.759883 | 0.124814  |
| H  | -2.667790 | 1.990755  | 4.861914  |
| H  | 0.987555  | -5.386030 | -2.186832 |
| C  | -4.076308 | 0.486598  | 4.223483  |
| H  | -3.893690 | -0.032485 | 5.179429  |
| H  | -4.988002 | 1.094697  | 4.365130  |
| H  | -5.380642 | -0.981143 | 3.257758  |
| H  | -3.666005 | -1.440130 | 3.287642  |



## *trans*-11-skew-boat

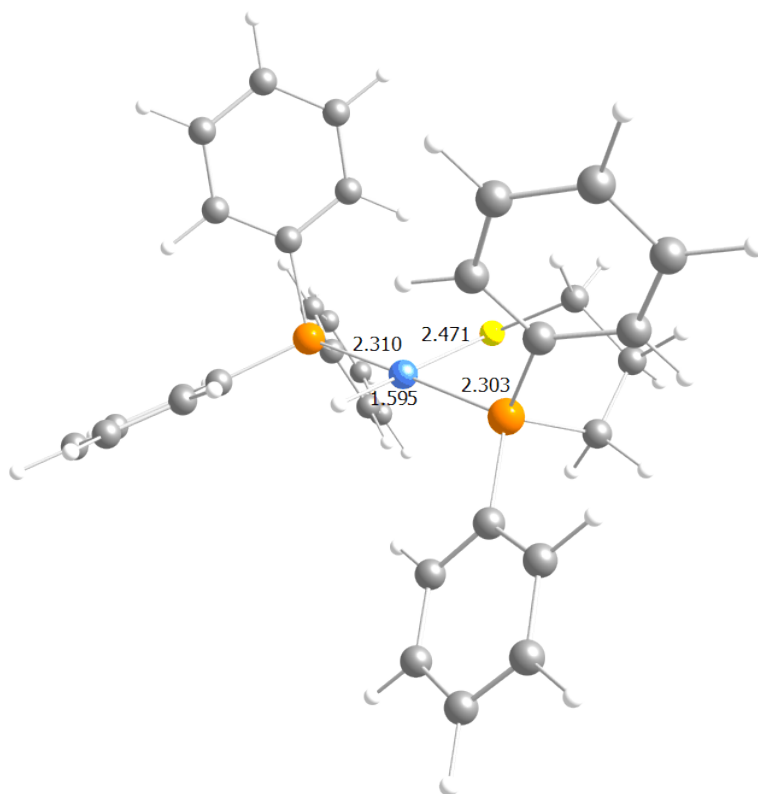

Zero-point correction= 0.554957 (Hartree/Particle)  
Thermal correction to Energy= 0.590061  
Thermal correction to Enthalpy= 0.591005  
Thermal correction to Gibbs Free Energy= 0.482319  
Sum of electronic and zero-point Energies= -2475.528670  
Sum of electronic and thermal Energies= -2475.493567  
Sum of electronic and thermal Enthalpies= -2475.492622  
Sum of electronic and thermal Free Energies= -2475.601309

|    |           |           |           |
|----|-----------|-----------|-----------|
| H  | -6.895023 | 0.632642  | -3.460704 |
| H  | -6.056747 | 2.217574  | -1.725155 |
| C  | -5.905048 | 0.489313  | -3.019836 |
| C  | -5.434377 | 1.380229  | -2.050138 |
| H  | -5.481758 | -1.298248 | -4.165127 |
| C  | -5.113086 | -0.593493 | -3.415318 |
| H  | -0.073263 | -1.373915 | 7.497690  |
| C  | -4.174606 | 1.192217  | -1.477510 |
| H  | -3.820396 | 1.867870  | -0.695379 |
| H  | 1.614528  | -2.791428 | 6.330185  |
| C  | -3.849923 | -0.782880 | -2.847781 |
| C  | 0.098501  | -1.251267 | 6.425251  |
| C  | 1.044309  | -2.045872 | 5.770041  |
| C  | -3.371303 | 0.113196  | -1.879132 |
| H  | -3.238800 | -1.634741 | -3.154681 |
| H  | -1.374074 | 0.307671  | 6.235222  |
| H  | 1.104215  | 4.549555  | 5.965803  |
| H  | -1.983851 | 0.930695  | -3.931113 |
| C  | -0.634844 | -0.300493 | 5.709424  |
| H  | -0.407490 | 2.080197  | -5.454686 |
| H  | 1.015374  | 6.241531  | 4.134366  |
| H  | 0.138363  | -1.528889 | -2.989852 |
| C  | 0.622562  | 4.304503  | 5.015624  |
| C  | 1.252435  | -1.890144 | 4.395809  |
| H  | 1.984608  | -2.514503 | 3.877611  |
| H  | -0.130076 | 1.054480  | 0.903431  |
| C  | 0.573797  | 5.252316  | 3.988108  |
| H  | 0.113480  | 2.304887  | 5.637544  |
| C  | -0.980328 | 1.176788  | -3.579316 |
| C  | 0.059915  | 3.038781  | 4.830338  |
| C  | -0.088760 | 1.824167  | -4.440949 |
| C  | -0.428571 | -0.135265 | 4.328774  |
| C  | -0.033806 | 4.927946  | 2.771325  |
| C  | 0.518137  | -0.943854 | 3.676463  |
| C  | -0.351950 | -2.255240 | -2.338581 |
| H  | -0.068193 | 5.661715  | 1.961963  |
| H  | 0.662097  | -3.941000 | -3.231253 |
| P  | -1.709150 | -0.057903 | -1.120216 |
| C  | -0.552004 | 2.707155  | 3.610521  |
| C  | -0.590254 | 0.848863  | -2.270427 |
| C  | -0.589209 | 3.659683  | 2.578984  |
| Pt | -1.611487 | 0.504449  | 1.117709  |
| C  | -0.057428 | -3.616643 | -2.474897 |
| H  | 0.662147  | -0.833602 | 2.598823  |
| C  | 1.201656  | 2.142571  | -4.009073 |
| H  | 1.896987  | 2.648892  | -4.683673 |
| C  | -1.270724 | -1.828363 | -1.368103 |
| P  | -1.370181 | 1.083871  | 3.333294  |
| H  | -1.042312 | 3.394244  | 1.620559  |
| C  | 0.705577  | 1.179973  | -1.841028 |
| C  | 1.597067  | 1.816420  | -2.707203 |
| C  | -0.680740 | -4.556248 | -1.649615 |
| C  | -1.894538 | -2.775650 | -0.535331 |
| H  | 1.005836  | 0.946954  | -0.817410 |
| H  | 2.602643  | 2.067009  | -2.359674 |
| H  | -2.610537 | -2.437678 | 0.220727  |
| C  | -2.995801 | 1.305062  | 4.185511  |
| C  | -1.601120 | -4.132404 | -0.683344 |
| S  | -3.887943 | -0.370541 | 1.516949  |
| H  | -2.804851 | -1.580249 | 3.328650  |
| C  | -3.747398 | -1.016573 | 3.238525  |
| H  | -2.091955 | -4.863472 | -0.035572 |
| H  | -4.559746 | -1.747813 | 3.375662  |
| H  | -0.449078 | -5.619188 | -1.757776 |
| C  | -3.845326 | 0.031807  | 4.357373  |
| H  | -4.895220 | 0.353491  | 4.461966  |
| H  | -3.573469 | -0.462360 | 5.307308  |
| H  | -2.840990 | 1.814170  | 5.150219  |
| H  | -3.509572 | 2.018129  | 3.522432  |



# cis-11-boat

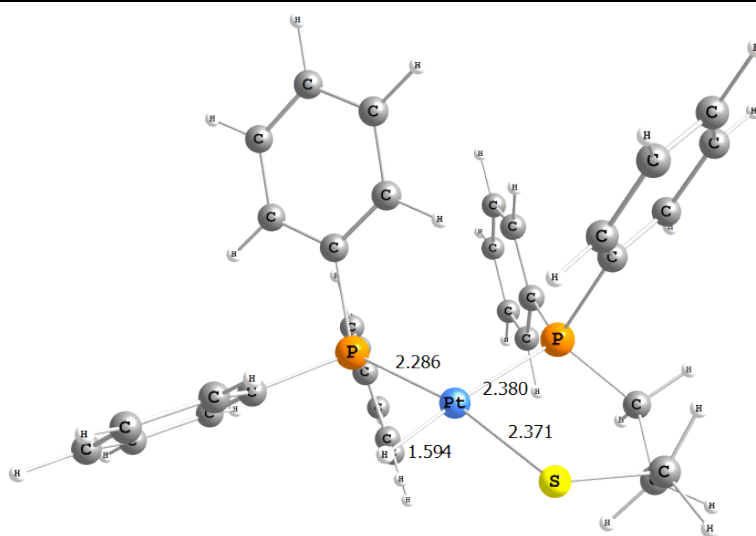

Zero-point correction= 0.555600 (Hartree/Particle)  
 Thermal correction to Energy= 0.590243  
 Thermal correction to Enthalpy= 0.591187  
 Thermal correction to Gibbs Free Energy= 0.487145  
 Sum of electronic and zero-point Energies= -2475.528041  
 Sum of electronic and thermal Energies= -2475.493398  
 Sum of electronic and thermal Enthalpies= -2475.492454  
 Sum of electronic and thermal Free Energies= -2475.596496

|    |           |           |           |
|----|-----------|-----------|-----------|
| H  | 3.051582  | 0.438883  | -5.031366 |
| H  | 1.206114  | 1.882084  | -4.165747 |
| C  | 2.660913  | 0.283761  | -4.022377 |
| C  | 1.626677  | 1.093142  | -3.537107 |
| H  | 3.989307  | -1.367387 | -3.588083 |
| C  | 3.185916  | -0.727104 | -3.214540 |
| H  | 2.553497  | -0.034821 | 5.574447  |
| C  | 1.118350  | 0.888531  | -2.253984 |
| H  | 0.295679  | 1.507099  | -1.887840 |
| H  | 3.124435  | -2.465615 | 5.692319  |
| C  | 2.685434  | -0.928550 | -1.922641 |
| C  | 1.912763  | -0.775873 | 5.089759  |
| C  | 2.232336  | -2.134308 | 5.154865  |
| C  | 1.646887  | -0.122213 | -1.433528 |
| H  | 3.106333  | -1.721830 | -1.301975 |
| H  | 0.530034  | 0.709975  | 4.382641  |
| H  | -3.289406 | 3.926096  | 3.130586  |
| H  | 3.789189  | 0.725155  | 0.229198  |
| C  | 0.767879  | -0.353441 | 4.09257   |
| H  | 4.915739  | 2.595546  | 1.400525  |
| H  | -3.424615 | 3.912611  | 5.623749  |
| H  | 3.436834  | -1.000118 | 1.956826  |
| C  | -2.980385 | 3.041601  | 3.693347  |
| C  | 1.410463  | -3.065621 | 4.514507  |
| H  | 1.662703  | -4.127941 | 4.535525  |
| H  | -1.323414 | 0.030905  | -1.097713 |
| C  | -3.059453 | 3.032401  | 5.088166  |
| H  | -2.472021 | 1.918449  | 1.912851  |
| C  | 3.218398  | 1.352173  | 0.918262  |
| C  | -2.511204 | 1.917373  | 3.004718  |
| C  | 3.851355  | 2.413086  | 1.569555  |
| C  | -0.075240 | -1.282818 | 3.775415  |
| C  | -2.673722 | 1.889415  | 5.798749  |
| C  | 0.274791  | -2.643410 | 3.821422  |
| C  | 2.943941  | -1.911984 | 1.618505  |
| H  | -2.736528 | 1.873818  | 6.889959  |
| H  | 4.408643  | -3.193219 | 2.550712  |
| P  | 0.977981  | -0.285122 | 0.280288  |
| C  | -2.116230 | 0.769980  | 3.710740  |
| C  | 1.850723  | 1.100954  | 1.129906  |
| C  | -2.207670 | 0.765394  | 5.114577  |
| Pt | -1.300471 | -0.290724 | 0.462882  |
| C  | 3.491350  | -3.153593 | 1.958028  |
| H  | -0.327714 | -3.389261 | 3.299975  |
| C  | 3.122703  | 3.248596  | 2.424397  |
| H  | 3.618621  | 4.081974  | 2.928805  |
| C  | 1.761210  | -1.844132 | 0.870741  |
| P  | -1.532175 | -0.722881 | 2.792286  |
| H  | -1.900641 | -0.118454 | 5.679999  |
| C  | 1.123655  | 1.959721  | 1.966691  |
| C  | 1.756457  | 3.025331  | 2.613960  |
| C  | 2.864776  | -4.335256 | 1.555972  |
| C  | 1.120439  | -3.037278 | 0.488956  |
| H  | 0.053747  | 1.801828  | 2.102048  |
| H  | 3.297220  | -5.303524 | 1.821169  |
| H  | 1.172803  | 3.683883  | 3.262389  |
| H  | 0.181861  | -2.986888 | -0.070326 |
| C  | -2.843743 | -1.987509 | 3.196387  |
| C  | 1.672774  | -4.274386 | 0.824720  |
| S  | -3.641858 | -0.150220 | 0.119114  |
| H  | -5.545766 | -1.020461 | 1.222051  |
| C  | -4.521287 | -0.843334 | 1.584254  |
| H  | 1.169384  | -5.194303 | 0.516354  |
| H  | -4.597691 | -0.091432 | 2.389911  |
| C  | -3.938989 | -2.154668 | 2.133269  |
| H  | -2.339296 | -2.949337 | 3.365049  |
| H  | -3.280083 | -1.685513 | 4.162304  |
| H  | -3.553319 | -2.745792 | 1.286716  |
| H  | -4.746526 | -2.750581 | 2.595250  |

## *trans*-11-boat

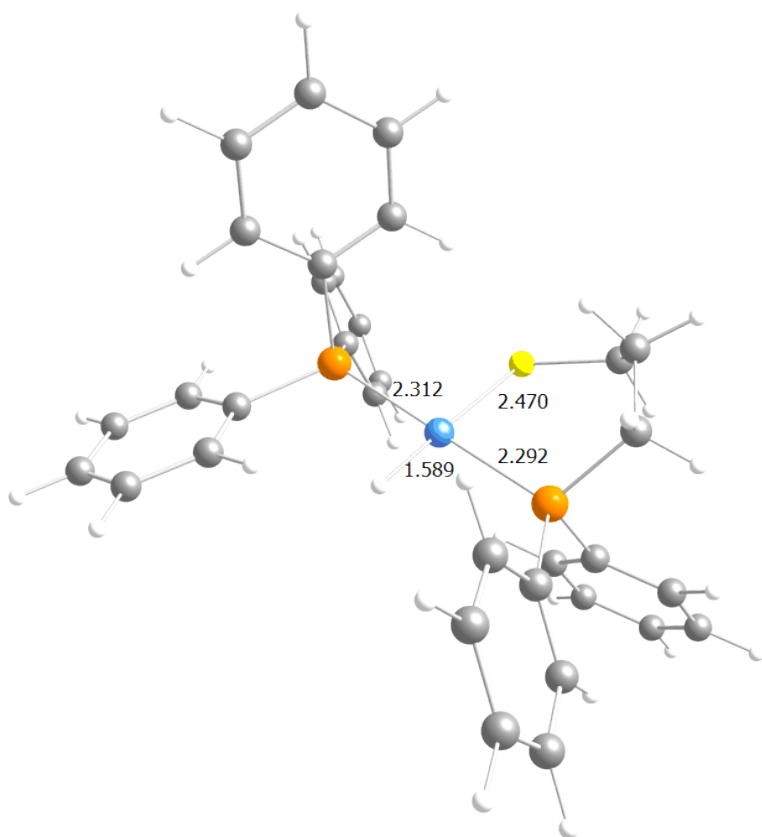

Zero-point correction= 0.554674 (Hartree/Particle)  
 Thermal correction to Energy= 0.589883  
 Thermal correction to Enthalpy= 0.590827  
 Thermal correction to Gibbs Free Energy= 0.481567  
 Sum of electronic and zero-point Energies= -2475.526610  
 Sum of electronic and thermal Energies= -2475.491402  
 Sum of electronic and thermal Enthalpies= -2475.490457  
 Sum of electronic and thermal Free Energies= -2475.599717

|    |           |           |           |
|----|-----------|-----------|-----------|
| H  | 2.842866  | -0.140345 | -5.260250 |
| H  | 0.885499  | 1.227143  | -4.528958 |
| C  | 2.518060  | -0.160413 | -4.216679 |
| C  | 1.421786  | 0.606004  | -3.806949 |
| H  | 4.045901  | -1.563872 | -3.600473 |
| C  | 3.191850  | -0.957789 | -3.287319 |
| H  | -7.021078 | 1.291480  | -2.280973 |
| C  | 0.998777  | 0.572077  | -2.476421 |
| H  | 0.128798  | 1.151768  | -2.161361 |
| H  | -6.020310 | 3.457420  | -3.008015 |
| C  | 2.777140  | -0.986038 | -1.952024 |
| C  | -6.092660 | 1.647077  | -1.826596 |
| C  | -5.531686 | 2.858724  | -2.235042 |
| C  | 1.675720  | -0.220377 | -1.534980 |
| H  | 3.314518  | -1.610485 | -1.235904 |
| H  | -5.919117 | -0.069244 | -0.532332 |
| H  | -3.967148 | -4.537312 | 1.082803  |
| C  | 3.222206  | 1.726006  | -0.825218 |
| C  | -5.470467 | 0.878041  | -0.835620 |
| H  | 4.405162  | 3.628358  | 0.238096  |
| H  | -6.280914 | -4.458737 | 2.012991  |
| H  | 3.779708  | -0.690453 | -1.544589 |
| C  | -4.438439 | -3.575805 | 1.300918  |
| C  | -4.333729 | 3.298084  | -1.657993 |
| H  | -3.881043 | 4.238867  | -1.981683 |
| H  | -1.323783 | 0.608208  | -0.810695 |
| C  | -5.733517 | -3.531691 | 1.823661  |
| H  | -2.713430 | -2.423648 | 0.677987  |
| C  | 3.005632  | 1.982952  | 0.213586  |
| C  | -3.733342 | -2.392044 | 1.064033  |
| C  | 3.673843  | 3.055859  | 0.814637  |
| C  | -4.275150 | 1.316411  | -0.248622 |
| C  | -6.327867 | -2.297282 | 2.108634  |
| C  | -3.704943 | 2.527905  | -0.679625 |
| C  | 3.214948  | -1.625280 | 1.526637  |
| H  | -7.340199 | -2.256176 | 2.518697  |
| H  | 4.780504  | -2.754168 | 2.495371  |
| P  | 1.137221  | -0.176769 | 0.226517  |
| C  | -4.321608 | -1.149197 | 1.347509  |
| C  | 2.061932  | 1.244673  | 0.943225  |
| C  | -5.625789 | -1.113231 | 1.872759  |
| Pt | -1.127301 | 0.019839  | 0.651751  |
| C  | 3.777268  | -2.787255 | 2.062690  |
| H  | -2.748410 | 2.853554  | -0.261095 |
| C  | 3.409042  | 3.392421  | 2.144646  |
| H  | 3.932472  | 4.230705  | 2.612075  |
| C  | 1.924640  | -1.656448 | 0.975115  |
| P  | -3.355914 | 0.383146  | 1.043049  |
| H  | -6.105844 | -0.157247 | 2.096793  |
| C  | 1.793433  | 1.587949  | 2.281128  |
| C  | 2.470665  | 2.653897  | 2.875786  |
| C  | 3.056442  | -3.985646 | 2.051702  |
| C  | 1.201256  | -2.859667 | 0.976589  |
| H  | 1.054370  | 1.010403  | 2.845711  |
| H  | 3.495744  | -4.892132 | 2.476239  |
| H  | 2.260355  | 2.912411  | 3.916989  |
| H  | 0.183235  | -2.877637 | 0.581187  |
| C  | -3.603961 | 1.426577  | 2.565152  |
| C  | 1.768201  | -4.019483 | 1.508666  |
| S  | -0.866472 | -0.960228 | 2.904191  |
| H  | -1.806420 | -0.319805 | 4.997916  |
| C  | -2.193087 | -0.243827 | 3.969997  |
| H  | 1.194739  | -4.949692 | 1.512975  |
| H  | -3.098866 | -0.874593 | 3.928137  |
| C  | -2.557555 | 1.219313  | 3.672650  |
| H  | -3.592448 | 2.470784  | 2.217097  |
| H  | -4.620390 | 1.229400  | 2.941631  |
| H  | -1.635392 | 1.764481  | 3.414058  |
| H  | -2.958792 | 1.689741  | 4.588405  |

## TS[*trans*-11-boat→skew-boat]

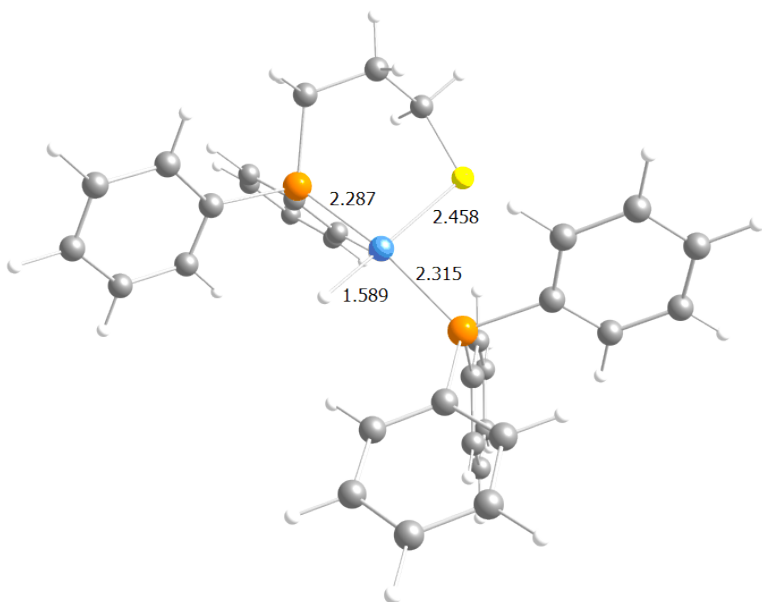

Zero-point correction= 0.554465 (Hartree/Particle)  
 Thermal correction to Energy= 0.588880  
 Thermal correction to Enthalpy= 0.589824  
 Thermal correction to Gibbs Free Energy= 0.483135  
 Sum of electronic and zero-point Energies= -2475.524323  
 Sum of electronic and thermal Energies= -2475.489907  
 Sum of electronic and thermal Enthalpies= -2475.488963  
 Sum of electronic and thermal Free Energies= -2475.595652

|    |           |           |           |
|----|-----------|-----------|-----------|
| H  | 2.813526  | -4.295733 | -3.707598 |
| H  | 0.568831  | -3.226571 | -3.943641 |
| C  | 2.464416  | -3.580503 | -2.958269 |
| C  | 1.206802  | -2.981331 | -3.090670 |
| H  | 4.250365  | -3.733517 | -1.746064 |
| C  | 3.269013  | -3.265839 | -1.860098 |
| H  | -7.010419 | 3.201102  | 0.217897  |
| C  | 0.754676  | -2.077105 | -2.127828 |
| H  | -0.236290 | -1.627797 | -2.219935 |
| H  | -5.344097 | 5.040423  | -0.049190 |
| C  | 2.823962  | -2.351304 | -0.899621 |
| C  | -5.940488 | 2.984948  | 0.275857  |
| C  | -5.005209 | 4.015817  | 0.124978  |
| C  | 1.561705  | -1.749063 | -1.025592 |
| H  | 3.464472  | -2.111475 | -0.049051 |
| H  | -6.245294 | 0.875384  | 0.597477  |
| H  | -5.243484 | -1.199162 | -3.685936 |
| H  | 2.485326  | 0.317347  | -2.282261 |
| C  | -5.507472 | 1.676413  | 0.496698  |
| H  | 2.991184  | 2.541313  | -3.254639 |
| H  | -6.425739 | -3.325441 | -3.115470 |
| H  | 3.594619  | 0.761370  | 0.833806  |
| C  | -5.241588 | -1.569543 | -2.657576 |
| C  | -3.639258 | 3.730289  | 0.193571  |
| H  | -2.903397 | 4.529464  | 0.073651  |
| H  | -1.545556 | -1.330650 | -0.640110 |
| C  | -5.903820 | -2.761290 | -2.338402 |
| H  | -4.053817 | 0.074272  | -1.926214 |
| C  | 2.126340  | 1.218797  | -1.781712 |
| C  | -4.574404 | -0.850787 | -1.666218 |
| C  | 2.412396  | 2.474613  | -2.329700 |
| C  | -4.134243 | 1.384034  | 0.572623  |
| C  | -5.890502 | -3.226038 | -1.022179 |
| C  | -3.201637 | 2.420069  | 0.413935  |
| C  | 3.327525  | 0.078308  | 1.643384  |
| H  | -6.400584 | -4.157364 | -0.763097 |
| H  | 5.130677  | 0.476400  | 2.763771  |
| P  | 0.956169  | -0.495697 | 0.181654  |
| C  | -4.562199 | -1.307317 | -0.335515 |
| C  | 1.379469  | 1.119975  | -0.598446 |
| C  | -5.222726 | -2.504375 | -0.025508 |
| Pt | -1.298648 | -0.524623 | 0.706970  |
| C  | 4.192054  | -0.082703 | 2.729865  |
| H  | -2.135230 | 2.197066  | 0.474705  |
| C  | 1.961725  | 3.636512  | -1.698168 |
| H  | 2.185552  | 4.616205  | -2.128470 |
| C  | 2.116733  | -0.630563 | 1.595345  |
| P  | -3.572214 | -0.346148 | 0.883254  |
| H  | -5.220711 | -2.896484 | 0.992958  |
| C  | 0.925614  | 2.292058  | 0.034538  |
| C  | 1.221946  | 3.541255  | -0.513282 |
| C  | 3.854227  | -0.952757 | 3.771520  |
| C  | 1.775157  | -1.491117 | 2.650705  |
| H  | 0.340805  | 2.220748  | 0.956789  |
| H  | 4.529686  | -1.074956 | 4.622347  |
| H  | 0.868424  | 4.446399  | -0.012382 |
| H  | 0.814712  | -2.009749 | 2.633223  |
| C  | -4.287878 | -0.749444 | 2.549438  |
| H  | -5.215925 | -0.163009 | 2.646498  |
| C  | 2.646254  | -1.656226 | 3.729733  |
| S  | -0.915536 | 0.667978  | 2.822323  |
| H  | -3.139855 | 1.624991  | 3.274293  |
| H  | -4.578997 | -1.809404 | 2.538162  |
| C  | -2.532017 | 0.804831  | 3.695191  |
| H  | 2.371446  | -2.324279 | 4.549729  |
| H  | -2.272089 | 1.103825  | 4.722226  |
| C  | -3.347492 | -0.497552 | 3.741783  |
| H  | -2.643173 | -1.339339 | 3.839522  |
| H  | -3.976191 | -0.504093 | 4.650086  |

# TS[*trans*-11-skew-boat→chair]

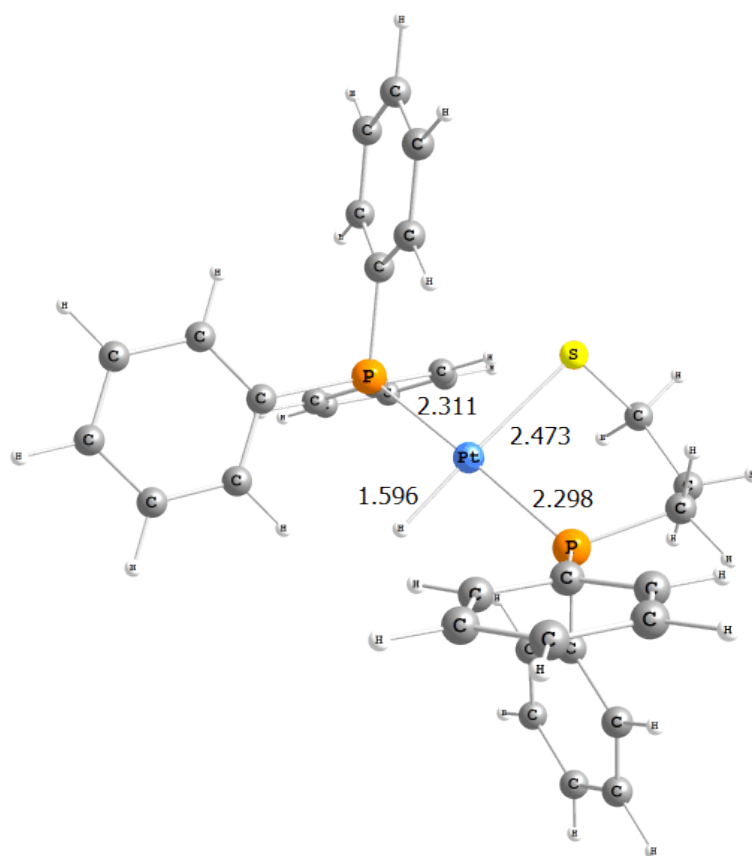

Zero-point correction= 0.554283 (Hartree/Particle)  
 Thermal correction to Energy= 0.588875  
 Thermal correction to Enthalpy= 0.589820  
 Thermal correction to Gibbs Free Energy= 0.481878  
 Sum of electronic and zero-point Energies= -2475.524967  
 Sum of electronic and thermal Energies= -2475.490374  
 Sum of electronic and thermal Enthalpies= -2475.489430  
 Sum of electronic and thermal Free Energies= -2475.597371

|    |           |           |           |
|----|-----------|-----------|-----------|
| H  | 1.900650  | -1.163559 | -5.507240 |
| H  | -0.138573 | -2.020852 | -4.348195 |
| C  | 1.749276  | -0.964533 | -4.443101 |
| C  | 0.606695  | -1.444653 | -3.793760 |
| H  | 3.585607  | 0.159814  | -4.227582 |
| C  | 2.693036  | -0.223658 | -3.726528 |
| H  | -4.326190 | 2.642314  | -2.942003 |
| C  | 0.406708  | -1.180193 | -2.437165 |
| H  | -0.496689 | -1.534060 | -1.936061 |
| H  | -5.907257 | 4.332706  | -2.005093 |
| C  | 2.501596  | 0.032241  | -2.364805 |
| C  | -4.525740 | 2.670747  | -1.867774 |
| C  | -5.410383 | 3.619102  | -1.342794 |
| C  | 1.355241  | -0.443887 | -1.707987 |
| H  | 3.248825  | 0.608991  | -1.816819 |
| H  | -3.172453 | 1.041753  | -1.428051 |
| H  | -4.055095 | -4.349662 | 1.343933  |
| H  | 3.968076  | -0.117038 | 0.894228  |
| C  | -3.882911 | 1.764909  | -1.022011 |
| H  | 5.488464  | 1.766928  | 1.448376  |
| H  | -6.542586 | -4.161662 | 1.387316  |
| H  | 1.273860  | -0.979426 | 2.848905  |
| C  | -4.530912 | -3.365725 | 1.355310  |
| C  | -5.649362 | 3.656518  | 0.033286  |
| H  | -6.332951 | 4.399630  | 0.451928  |
| H  | -1.640659 | -0.431714 | -0.563380 |
| C  | -5.924633 | -3.259980 | 1.379558  |
| H  | -2.649103 | -2.289016 | 1.300575  |
| C  | 3.591348  | 0.908294  | 0.875224  |
| C  | -3.739211 | -2.212932 | 1.337345  |
| C  | 4.445972  | 1.968983  | 1.189092  |
| C  | -4.127758 | 1.787087  | 0.362652  |
| C  | -6.528706 | -1.997462 | 1.387244  |
| C  | -5.013320 | 2.745345  | 0.883125  |
| C  | 1.725630  | -1.796142 | 2.276700  |
| H  | -7.618339 | -1.911049 | 1.398530  |
| H  | 2.186480  | -2.992721 | 4.009628  |
| P  | 1.084048  | -0.184819 | 0.096442  |
| C  | -4.339727 | -0.944125 | 1.353063  |
| C  | 2.249678  | 1.158106  | 0.547984  |
| C  | -5.740672 | -0.844231 | 1.376249  |
| Pt | -1.085541 | 0.189378  | 0.798566  |
| C  | 2.238459  | -2.923556 | 2.919895  |
| H  | -5.212175 | 2.796807  | 1.954815  |
| C  | 3.966914  | 3.282793  | 1.178881  |
| H  | 4.635116  | 4.110518  | 1.430480  |
| C  | 1.793110  | -1.695204 | 0.874739  |
| P  | -3.269754 | 0.549561  | 1.414315  |
| H  | -6.219812 | 0.138566  | 1.372713  |
| C  | 1.770982  | 2.477853  | 0.548353  |
| C  | 2.628810  | 3.534956  | 0.859205  |
| C  | 2.812077  | -3.962426 | 2.176434  |
| C  | 2.373187  | -2.734354 | 0.132169  |
| H  | 0.717796  | 2.671167  | 0.328743  |
| H  | 3.207443  | -4.846702 | 2.683283  |
| H  | 2.245797  | 4.558359  | 0.865979  |
| H  | 2.433394  | -2.667331 | -0.955824 |
| C  | -3.479044 | 1.145770  | 3.146238  |
| C  | 2.877782  | -3.865527 | 0.784251  |
| S  | -0.320679 | 1.147802  | 2.946697  |
| H  | -0.869563 | 0.406035  | 5.143812  |
| C  | -1.261396 | 0.117276  | 4.156440  |
| H  | 3.325658  | -4.672098 | 0.197882  |
| H  | -0.968740 | -0.933104 | 4.004459  |
| C  | -2.817041 | 0.221665  | 4.178494  |
| H  | -3.034330 | 2.151881  | 3.183126  |
| H  | -4.556880 | 1.223934  | 3.360261  |
| H  | -3.134873 | 0.578138  | 5.172363  |
| H  | -3.250216 | -0.788119 | 4.075261  |

## ADF xyz coordinates for EDA:

| <i>cis-5</i>     |           |           |           | <i>trans-5</i>      |           |           |           |
|------------------|-----------|-----------|-----------|---------------------|-----------|-----------|-----------|
| <b>-10.12399</b> |           |           |           | <b>-10.11940868</b> |           |           |           |
| H                | -5.034959 | 2.995798  | -4.687181 | H                   | -8.215198 | -2.714741 | 2.519652  |
| H                | -2.958607 | 1.656723  | -4.376854 | H                   | -6.875580 | -2.386295 | 0.447011  |
| C                | -4.871371 | 2.446792  | -3.760690 | C                   | -7.187484 | -2.358605 | 2.583033  |
| C                | -3.705165 | 1.697899  | -3.584725 | C                   | -6.437109 | -2.172771 | 1.420975  |
| H                | -6.741567 | 3.060657  | -2.878491 | H                   | -7.206133 | -2.195019 | 4.734763  |
| C                | -5.825835 | 2.485903  | -2.746189 | C                   | -6.622693 | -2.068184 | 3.823940  |
| H                | -6.224428 | -3.437928 | -2.568854 | H                   | -2.194493 | -5.696253 | 3.896145  |
| C                | -3.495089 | 1.002531  | -2.396534 | C                   | -5.131018 | -1.694795 | 1.498621  |
| H                | -5.728968 | -1.088456 | -1.989992 | H                   | -3.549290 | -3.647210 | 3.644870  |
| H                | -2.592276 | 0.403490  | -2.271646 | H                   | -4.558173 | -1.513113 | 0.589960  |
| C                | -5.591600 | -3.217732 | -1.709884 | C                   | -1.714835 | -4.770391 | 3.581274  |
| C                | -5.618398 | 1.787890  | -1.554757 | C                   | -5.309713 | -1.604237 | 3.907034  |
| C                | -5.313061 | -1.891120 | -1.382275 | C                   | -2.479502 | -3.611526 | 3.444924  |
| H                | -5.273646 | -5.291886 | -1.209031 | H                   | 0.244329  | -5.655246 | 3.408568  |
| C                | -4.450678 | 1.039454  | -1.367702 | C                   | -4.552054 | -1.418362 | 2.743707  |
| C                | -5.057011 | -4.256640 | -0.947509 | C                   | -0.347461 | -4.746003 | 3.307645  |
| H                | -6.372935 | 1.827951  | -0.770276 | H                   | -4.883557 | -1.371069 | 4.881462  |
| H                | -0.676018 | 1.667286  | -0.918943 | H                   | -0.709558 | 1.159489  | -1.063708 |
| H                | -1.833869 | 2.782001  | -0.575069 | H                   | -1.981183 | 2.207429  | -0.939743 |
| C                | -4.485247 | -1.595716 | -0.291152 | C                   | -1.873403 | -2.418380 | 3.034662  |
| N                | -1.141374 | 2.159416  | -0.148346 | N                   | -1.199579 | 1.794936  | -0.425972 |
| C                | -4.233164 | -3.966932 | 0.141120  | C                   | 0.257906  | -3.558246 | 2.893724  |
| P                | -4.075869 | 0.129987  | 0.191083  | P                   | -2.803135 | -0.846786 | 2.828127  |
| C                | -3.936030 | -2.643485 | 0.460726  | C                   | -0.500932 | -2.398846 | 2.749022  |
| H                | -3.805709 | -4.774320 | 0.733426  | H                   | 1.324329  | -3.536300 | 2.671563  |
| C                | -0.125013 | 2.923977  | 0.624547  | C                   | -0.268144 | 2.826205  | 0.103858  |
| H                | 1.376781  | 1.381743  | 0.551940  | H                   | 1.328466  | 1.436442  | 0.503048  |
| H                | -6.819327 | -1.021112 | 0.768350  | H                   | -1.960356 | -1.823136 | 5.543090  |
| C                | -5.487850 | 0.611077  | 1.264731  | C                   | -2.713825 | -0.086055 | 4.495873  |
| Pt               | -2.019644 | 0.564190  | 1.185484  | Pt                  | -1.966218 | 0.500102  | 1.189911  |
| C                | -6.679054 | -0.116299 | 1.357890  | C                   | -2.270383 | -0.782276 | 5.625120  |
| H                | -3.263625 | -2.409115 | 1.284828  | H                   | -0.041599 | -1.462371 | 2.422830  |
| H                | -0.660509 | 3.514502  | 1.379274  | H                   | -0.871710 | 3.558817  | 0.655263  |
| C                | 0.822831  | 1.962998  | 1.309122  | C                   | 0.724470  | 2.181837  | 1.048395  |
| H                | -4.353681 | 2.270711  | 2.035801  | H                   | -3.367538 | 1.819040  | 3.723201  |
| C                | -5.307969 | 1.744061  | 2.070093  | C                   | -3.066168 | 1.265753  | 4.611718  |
| H                | 1.566572  | 2.536933  | 1.879416  | H                   | 1.419892  | 2.952747  | 1.409114  |
| C                | -7.681090 | 0.296600  | 2.237778  | C                   | -2.198817 | -0.136113 | 6.859840  |
| H                | -8.595129 | -0.289027 | 2.324891  | H                   | -1.838436 | -0.680789 | 7.731366  |
| H                | -2.441969 | -0.579031 | 2.243196  | H                   | -3.186023 | -0.055844 | 0.239821  |
| S                | -0.030616 | 0.835920  | 2.491979  | S                   | -0.094905 | 1.432463  | 2.515464  |
| C                | -6.320645 | 2.170577  | 2.924577  | C                   | -3.008422 | 1.901610  | 5.848343  |
| C                | -7.508760 | 1.442534  | 3.013431  | C                   | -2.572454 | 1.201969  | 6.974783  |
| H                | -6.172323 | 3.056630  | 3.540286  | H                   | -3.283248 | 2.952227  | 5.929076  |
| H                | -8.291199 | 1.758023  | 3.702801  | H                   | -2.508826 | 1.704276  | 7.939397  |
| H                | 0.429059  | 3.611893  | -0.039206 | H                   | 0.248334  | 3.338744  | -0.727592 |

| <i>cis</i> -6       |           |           |           | <i>trans</i> -6  |           |           |           |
|---------------------|-----------|-----------|-----------|------------------|-----------|-----------|-----------|
| <b>-11.51524246</b> |           |           |           | <b>-11.50788</b> |           |           |           |
| H                   | -4.998615 | 3.031569  | -4.630970 | H                | -8.214975 | -2.787848 | 2.405099  |
| H                   | -3.043321 | 1.507311  | -4.400342 | H                | -6.933188 | -2.203386 | 0.351675  |
| C                   | -4.855771 | 2.460481  | -3.714496 | C                | -7.191905 | -2.422054 | 2.484122  |
| C                   | -3.758013 | 1.605838  | -3.584444 | C                | -6.473584 | -2.093916 | 1.333221  |
| H                   | -6.626131 | 3.241001  | -2.760350 | H                | -7.161574 | -2.497790 | 4.640283  |
| C                   | -5.765017 | 2.580703  | -2.665712 | C                | -6.601769 | -2.260336 | 3.736860  |
| H                   | -6.385605 | -3.506887 | -2.406557 | H                | -2.250271 | -5.771071 | 3.797241  |
| C                   | -3.570181 | 0.884237  | -2.408934 | C                | -5.170501 | -1.608875 | 1.432739  |
| H                   | -5.859957 | -1.148231 | -1.874670 | H                | -3.583482 | -3.710759 | 3.569643  |
| H                   | -2.716488 | 0.211461  | -2.318162 | H                | -4.621833 | -1.321409 | 0.536515  |
| C                   | -5.685416 | -3.277728 | -1.604444 | C                | -1.759516 | -4.845279 | 3.500271  |
| C                   | -5.580028 | 1.857891  | -1.484941 | C                | -5.295077 | -1.784920 | 3.839964  |
| C                   | -5.393637 | -1.948497 | -1.301034 | C                | -2.512499 | -3.677993 | 3.377885  |
| H                   | -5.310405 | -5.347757 | -1.126377 | H                | 0.193492  | -5.745275 | 3.326948  |
| C                   | -4.481902 | 1.001080  | -1.345944 | C                | -4.565649 | -1.463642 | 2.686977  |
| H                   | 2.148912  | 5.631460  | -1.112258 | H                | 1.804698  | 5.540947  | -1.787369 |
| O                   | 0.250837  | 4.158069  | -1.406694 | O                | -0.108673 | 4.069095  | -1.679942 |
| C                   | -5.080135 | -4.310203 | -0.887059 | C                | -0.390034 | -4.830151 | 3.236277  |
| H                   | -6.297250 | 1.966829  | -0.672407 | H                | -4.847234 | -1.650613 | 4.823561  |
| H                   | -0.873215 | 1.933555  | -0.939422 | H                | -0.698533 | 1.527386  | -0.863294 |
| H                   | -2.056664 | 2.914162  | -0.400635 | H                | -1.966144 | 2.546931  | -0.645909 |
| C                   | 1.758838  | 6.014180  | -0.165023 | C                | 1.628559  | 5.923523  | -0.778337 |
| C                   | -4.490436 | -1.644091 | -0.273733 | C                | -1.895043 | -2.482868 | 2.988427  |
| C                   | 0.356457  | 4.100547  | -0.194450 | C                | 0.233222  | 4.023392  | -0.511364 |
| H                   | 2.563928  | 6.349227  | 0.492248  | H                | 2.558295  | 6.247072  | -0.306044 |
| N                   | -1.314812 | 2.283041  | -0.079869 | N                | -1.215078 | 2.057563  | -0.152683 |
| C                   | -4.168690 | -4.011395 | 0.126327  | C                | 0.227813  | -3.643177 | 2.841124  |
| P                   | -4.107634 | 0.085673  | 0.208419  | P                | -2.817986 | -0.903252 | 2.814564  |
| O                   | 1.078424  | 4.958995  | 0.566254  | O                | 1.106896  | 4.872722  | 0.078820  |
| C                   | -3.866516 | -2.684441 | 0.426555  | C                | -0.521561 | -2.474439 | 2.705223  |
| H                   | -3.682172 | -4.813086 | 0.679731  | H                | 1.294679  | -3.628523 | 2.621569  |
| C                   | -0.294877 | 3.032045  | 0.685054  | C                | -0.301586 | 3.012764  | 0.506906  |
| H                   | 1.248900  | 1.550770  | 0.400182  | H                | 1.344859  | 1.618858  | 0.539891  |
| H                   | -6.976219 | -0.852025 | 0.509297  | H                | -1.825776 | -1.861772 | 5.493964  |
| C                   | -5.522086 | 0.551799  | 1.284348  | C                | -2.769228 | -0.186237 | 4.503548  |
| Pt                  | -2.037222 | 0.550724  | 1.168320  | Pt               | -1.964567 | 0.584819  | 1.308935  |
| C                   | -6.786794 | -0.043010 | 1.212724  | C                | -2.227861 | -0.855501 | 5.604426  |
| H                   | -3.136964 | -2.440489 | 1.197684  | H                | -0.051016 | -1.539584 | 2.388712  |
| H                   | -0.791215 | 3.524229  | 1.533843  | H                | -0.887259 | 3.571344  | 1.254378  |
| C                   | 0.742492  | 2.056053  | 1.240769  | C                | 0.777661  | 2.237198  | 1.258197  |
| H                   | -4.275897 | 1.962938  | 2.321217  | H                | -3.635120 | 1.658895  | 3.791956  |
| C                   | -5.282373 | 1.549508  | 2.237072  | C                | -3.246670 | 1.123844  | 4.658123  |
| H                   | 1.503317  | 2.620471  | 1.793805  | H                | 1.480939  | 2.950578  | 1.702021  |
| C                   | -7.803933 | 0.377415  | 2.069181  | C                | -2.180578 | -0.225912 | 6.850141  |
| H                   | -8.781217 | -0.100595 | 2.020368  | H                | -1.741329 | -0.746261 | 7.699997  |
| H                   | -2.366953 | -0.674136 | 2.164022  | H                | -3.274905 | 0.230649  | 0.392401  |
| S                   | -0.000042 | 0.831557  | 2.394893  | S                | 0.056709  | 1.226467  | 2.610437  |
| C                   | -6.305574 | 1.980720  | 3.078922  | C                | -3.212538 | 1.741182  | 5.903757  |
| C                   | -7.568957 | 1.394693  | 2.995091  | C                | -2.677138 | 1.066618  | 7.004135  |
| H                   | -6.109458 | 2.759731  | 3.814016  | H                | -3.585064 | 2.758791  | 6.012452  |
| H                   | -8.365573 | 1.716455  | 3.664916  | H                | -2.630548 | 1.557220  | 7.975722  |
| H                   | 1.055052  | 6.831681  | -0.357510 | H                | 0.908931  | 6.748975  | -0.814091 |

| <i>cis</i> -7       |           |           |           | <i>trans</i> -7  |           |           |           |
|---------------------|-----------|-----------|-----------|------------------|-----------|-----------|-----------|
| <b>-12.10888253</b> |           |           |           | <b>-12.10313</b> |           |           |           |
| H                   | -5.059447 | 2.974198  | -4.657110 | H                | -8.242372 | -2.741353 | 2.393837  |
| H                   | -3.023438 | 1.568346  | -4.378452 | H                | -6.954437 | -2.168336 | 0.340796  |
| C                   | -4.899283 | 2.421080  | -3.732440 | C                | -7.214090 | -2.390051 | 2.472771  |
| C                   | -3.756216 | 1.633233  | -3.575205 | C                | -6.492165 | -2.068995 | 1.322113  |
| H                   | -6.729421 | 3.104287  | -2.816555 | H                | -7.181147 | -2.479533 | 4.628259  |
| C                   | -5.832620 | 2.496935  | -2.700601 | C                | -6.619133 | -2.244993 | 3.725415  |
| H                   | -6.311113 | -3.479030 | -2.479926 | H                | -2.233527 | -5.770214 | 3.854491  |
| C                   | -3.547535 | 0.934526  | -2.388995 | C                | -5.181967 | -1.603319 | 1.421802  |
| H                   | -5.818815 | -1.125425 | -1.907312 | H                | -3.575980 | -3.716179 | 3.613062  |
| H                   | -2.660179 | 0.310038  | -2.278484 | H                | -4.631182 | -1.318525 | 0.525997  |
| C                   | -5.645090 | -3.255143 | -1.647695 | C                | -1.749893 | -4.847091 | 3.537119  |
| C                   | -5.626920 | 1.796375  | -1.510274 | C                | -5.304889 | -1.790204 | 3.828491  |
| C                   | -5.370061 | -1.927416 | -1.322520 | C                | -2.507495 | -3.683624 | 3.406918  |
| H                   | -5.281721 | -5.328150 | -1.173232 | H                | 0.203013  | -5.744803 | 3.354861  |
| C                   | -4.482619 | 1.007585  | -1.342893 | C                | -4.573825 | -1.471126 | 2.675827  |
| H                   | 1.814763  | 5.845350  | -1.137589 | H                | 1.525983  | 5.718867  | -1.731077 |
| O                   | 0.116754  | 4.262875  | -1.365137 | O                | -0.199453 | 4.155890  | -1.605242 |
| C                   | -5.065265 | -4.291850 | -0.915704 | C                | -0.383696 | -4.832270 | 3.255870  |
| H                   | -6.364480 | 1.868325  | -0.712146 | H                | -4.852460 | -1.667569 | 4.811681  |
| H                   | -0.761066 | 1.812800  | -0.930220 | H                | -0.691520 | 1.531114  | -0.850697 |
| H                   | -1.964649 | 2.831709  | -0.522059 | H                | -1.958843 | 2.551780  | -0.633182 |
| H                   | 1.266934  | 8.170591  | -0.272466 | H                | 1.205263  | 8.094758  | -0.884418 |
| H                   | -0.174344 | 7.129784  | -0.332278 | H                | -0.258403 | 7.107957  | -0.663633 |
| C                   | 1.692038  | 6.071199  | -0.072529 | C                | 1.592822  | 5.990965  | -0.671895 |
| C                   | -4.503044 | -1.628464 | -0.262988 | C                | -1.897782 | -2.493497 | 2.990650  |
| C                   | 0.333070  | 4.107166  | -0.175562 | C                | 0.203549  | 4.054058  | -0.458854 |
| H                   | 2.672612  | 6.195081  | 0.400080  | H                | 2.642713  | 6.098911  | -0.377592 |
| N                   | -1.253455 | 2.211055  | -0.121546 | N                | -1.213101 | 2.055057  | -0.139086 |
| C                   | 0.799499  | 7.272113  | 0.153474  | C                | 0.786351  | 7.230356  | -0.350831 |
| C                   | -4.196088 | -3.998674 | 0.135897  | C                | 0.224925  | -3.649718 | 2.834073  |
| P                   | -4.104297 | 0.099498  | 0.216079  | P                | -2.823075 | -0.916381 | 2.806724  |
| O                   | 1.120404  | 4.896871  | 0.591980  | O                | 1.113076  | 4.862304  | 0.132065  |
| C                   | -3.904970 | -2.673434 | 0.453732  | C                | -0.528828 | -2.485520 | 2.689195  |
| H                   | -3.730103 | -4.803961 | 0.701756  | H                | 1.289953  | -3.633506 | 2.605293  |
| C                   | -0.277918 | 2.987469  | 0.671698  | C                | -0.303380 | 3.004293  | 0.535526  |
| H                   | 1.308511  | 1.544461  | 0.429720  | H                | 1.354605  | 1.624116  | 0.525976  |
| H                   | -6.881982 | -0.993417 | 0.730662  | H                | -1.691557 | -1.785880 | 5.463596  |
| H                   | 0.640732  | 7.440202  | 1.226704  | H                | 0.813101  | 7.442288  | 0.725959  |
| C                   | -5.514237 | 0.587068  | 1.290549  | C                | -2.781286 | -0.188967 | 4.493510  |
| Pt                  | -2.029133 | 0.533451  | 1.165772  | Pt               | -1.959321 | 0.572490  | 1.310293  |
| C                   | -6.731264 | -0.101402 | 1.336904  | C                | -2.149299 | -0.804181 | 5.577564  |
| H                   | -3.200307 | -2.434381 | 1.248975  | H                | -0.063362 | -1.555185 | 2.353240  |
| H                   | -0.815725 | 3.453202  | 1.511452  | H                | -0.890576 | 3.537256  | 1.300974  |
| C                   | 0.766884  | 2.039446  | 1.254939  | C                | 0.787068  | 2.222557  | 1.260770  |
| H                   | -4.348775 | 2.193130  | 2.124185  | H                | -3.809765 | 1.581990  | 3.803470  |
| C                   | -5.321706 | 1.700346  | 2.119694  | C                | -3.341019 | 1.087863  | 4.654409  |
| H                   | 1.499164  | 2.621117  | 1.827024  | H                | 1.487653  | 2.931496  | 1.715353  |
| C                   | -7.748914 | 0.336336  | 2.185997  | C                | -2.085862 | -0.152014 | 6.811925  |
| H                   | -8.686055 | -0.216514 | 2.232550  | H                | -1.579336 | -0.632230 | 7.647942  |
| H                   | -2.399342 | -0.646755 | 2.200949  | H                | -3.283420 | 0.245543  | 0.401348  |
| S                   | 0.018353  | 0.798113  | 2.388688  | S                | 0.082479  | 1.176951  | 2.596615  |
| C                   | -6.349034 | 2.152277  | 2.944466  | C                | -3.290938 | 1.725105  | 5.888867  |
| C                   | -7.565645 | 1.468790  | 2.979314  | C                | -2.656695 | 1.108330  | 6.970700  |
| H                   | -6.191400 | 3.024614  | 3.577392  | H                | -3.728781 | 2.715581  | 6.003170  |
| H                   | -8.363399 | 1.807949  | 3.638929  | H                | -2.600257 | 1.618017  | 7.931469  |

| <i>cis</i> -8       |           |           |            | <i>trans</i> -8     |           |           |           |
|---------------------|-----------|-----------|------------|---------------------|-----------|-----------|-----------|
| <b>-14.90249165</b> |           |           |            | <b>-14.90419974</b> |           |           |           |
| H                   | -6.634827 | -0.831816 | -3.945327  | H                   | 1.896856  | -1.062992 | -5.608961 |
| H                   | -5.459658 | 1.346771  | -3.632499  | H                   | 1.060523  | 1.148351  | -4.822370 |
| C                   | -5.610762 | -0.808950 | -3.573811  | C                   | 1.776156  | -0.871438 | -4.543397 |
| C                   | -4.954060 | 0.410668  | -3.400430  | C                   | 1.309366  | 0.369496  | -4.102651 |
| H                   | -5.459354 | -2.952965 | -3.387994  | H                   | 2.432719  | -2.837517 | -3.948313 |
| C                   | -4.951938 | -1.997306 | -3.265558  | C                   | 2.076354  | -1.864394 | -3.613361 |
| H                   | -7.255219 | 2.813153  | -1.161650  | H                   | -7.116257 | 2.515422  | -1.646408 |
| C                   | -3.651771 | 0.441766  | -2.911544  | C                   | 1.144815  | 0.611652  | -2.742652 |
| H                   | -3.158910 | 1.402533  | -2.760744  | H                   | 0.760759  | 1.575924  | -2.410731 |
| H                   | -5.828278 | 4.849774  | -1.160249  | H                   | -5.894786 | 4.675627  | -1.487310 |
| C                   | -3.640519 | -1.971748 | -2.790087  | C                   | 1.917257  | -1.623104 | -2.246525 |
| C                   | -6.249019 | 2.774335  | -0.745583  | C                   | -6.153869 | 2.563359  | -1.138800 |
| C                   | -5.447802 | 3.914942  | -0.749755  | C                   | -5.466132 | 3.772671  | -1.054393 |
| C                   | -2.976607 | -0.752351 | -2.610392  | C                   | 1.459681  | -0.379105 | -1.799705 |
| H                   | -3.140865 | -2.909923 | -2.556033  | H                   | 2.142626  | -2.414813 | -1.534020 |
| H                   | -6.396177 | 0.688093  | -0.271097  | H                   | -6.146292 | 0.464024  | -0.676833 |
| H                   | -4.147627 | -4.737107 | -0.074527  | H                   | -4.273846 | -4.436295 | -1.190395 |
| H                   | -1.563825 | -0.110979 | -4.755870  | H                   | 3.523828  | 1.194463  | -1.283937 |
| C                   | -5.768686 | 1.573916  | -0.220262  | C                   | -5.607816 | 1.405150  | -0.585301 |
| H                   | -0.319506 | 1.378104  | -6.279311  | H                   | 4.853089  | 3.183897  | -0.670017 |
| H                   | -6.618768 | -4.809207 | 0.238575   | H                   | -6.602259 | -4.665146 | -0.344256 |
| H                   | -0.966977 | -2.485180 | -4.166095  | H                   | 3.930080  | -0.973821 | -0.011942 |
| C                   | -4.693733 | -3.836426 | 0.203170   | C                   | -4.730011 | -3.630620 | -0.617299 |
| C                   | -4.148448 | 3.849278  | -0.243556  | C                   | -4.211349 | 3.818343  | -0.447590 |
| H                   | -3.506271 | 4.728860  | -0.263046  | H                   | -3.657677 | 4.755335  | -0.408078 |
| H                   | 0.336376  | 0.155079  | 0.276511   | H                   | -1.441176 | -0.507797 | -1.033940 |
| C                   | -6.074691 | -3.876748 | 0.385647   | C                   | -6.034028 | -3.758393 | -0.140999 |
| H                   | -2.925609 | -2.596599 | 0.225233   | H                   | -2.971534 | -2.368193 | -0.701492 |
| C                   | -0.745774 | 0.492408  | -4.366048  | C                   | 3.218462  | 1.804014  | -0.434601 |
| C                   | -4.006411 | -2.635957 | 0.368397   | C                   | -3.996987 | -2.475086 | -0.348385 |
| C                   | -0.050148 | 1.341132  | -5.224896  | C                   | 3.965911  | 2.929512  | -0.091497 |
| C                   | -4.474985 | 1.504282  | 0.308368   | C                   | -4.358284 | 1.450461  | 0.042924  |
| C                   | -6.757431 | -2.723164 | 0.775568   | C                   | -6.607533 | -2.728480 | 0.606907  |
| C                   | -3.659581 | 2.650203  | 0.268047   | C                   | -3.647054 | 2.659315  | 0.077336  |
| C                   | -0.554716 | -2.956361 | -0.3275781 | C                   | 3.363962  | -1.556904 | 0.712218  |
| H                   | -7.833383 | -2.757627 | 0.941133   | H                   | -7.624980 | -2.827432 | 0.982153  |
| H                   | 0.026937  | -4.742477 | -4.324972  | H                   | 5.072151  | -2.712341 | 1.326018  |
| P                   | -1.327470 | -0.626227 | -1.814887  | P                   | 1.078595  | -0.036852 | -0.035092 |
| C                   | -4.685175 | -1.466111 | 0.735982   | C                   | -4.566076 | -1.440201 | 0.401880  |
| C                   | -0.423549 | 0.451063  | -3.002586  | C                   | 2.068436  | 1.477826  | 0.296866  |
| C                   | -6.066516 | -1.527673 | 0.969084   | C                   | -5.876243 | -1.576017 | 0.883457  |
| Pt                  | -1.302559 | 0.041257  | 0.434718   | Pt                  | -1.230057 | 0.003785  | 0.511650  |
| C                   | 0.006225  | -4.227713 | -3.365813  | C                   | 4.007514  | -2.532684 | 1.467920  |
| H                   | -2.622919 | 2.575611  | 0.607500   | H                   | -2.638714 | 2.672503  | 0.494496  |
| C                   | 0.976860  | 2.149293  | -4.734457  | C                   | 3.578557  | 3.728213  | 0.986023  |
| H                   | 1.513003  | 2.819052  | -5.405993  | H                   | 4.165317  | 4.606297  | 1.251815  |
| C                   | -0.593095 | -2.293824 | -2.042561  | C                   | 1.993342  | -1.327841 | 0.888913  |
| P                   | -3.642169 | 0.015878  | 0.992114   | P                   | -3.540727 | 0.007491  | 0.820700  |
| H                   | -6.608695 | -0.650988 | 1.316356   | H                   | -6.328148 | -0.782623 | 1.476255  |
| C                   | 0.603097  | 1.268223  | -2.514640  | C                   | 1.669045  | 2.294205  | 1.362151  |
| C                   | 1.305350  | 2.106316  | -3.379766  | C                   | 2.431779  | 3.407013  | 1.711462  |
| C                   | 0.546096  | -4.840219 | -2.231916  | C                   | 3.293832  | -3.270644 | 2.416226  |
| C                   | -0.042041 | -2.907348 | -0.911988  | C                   | 1.282095  | -2.067778 | 1.837956  |
| H                   | 0.828219  | 1.248788  | -1.448749  | H                   | 0.759088  | 2.056748  | 1.920839  |
| H                   | 2.100593  | 2.739236  | -2.988707  | H                   | 3.805084  | -4.023608 | 3.015052  |
| H                   | -0.054243 | -2.365685 | 0.035485   | H                   | 2.117597  | 4.030038  | 2.548119  |
| C                   | -3.708058 | 0.249879  | 2.834482   | H                   | 0.221276  | -1.858955 | 1.984301  |
| H                   | -4.717150 | 0.576761  | 3.133785   | C                   | -3.879965 | 0.264350  | 2.628214  |
| C                   | 0.527374  | -4.177089 | -1.006401  | H                   | -4.906883 | 0.643239  | 2.756636  |
| S                   | -0.931730 | 0.795382  | 2.693878   | C                   | 1.933708  | -3.034401 | 2.604397  |
| H                   | -2.890674 | 2.245449  | 2.967566   | S                   | -1.108286 | 0.670763  | 2.915636  |
| H                   | -3.515499 | -0.748664 | 3.256271   | H                   | -3.003368 | 2.229211  | 2.852964  |
| C                   | -2.631197 | 1.224590  | 3.282960   | H                   | -3.796160 | -0.730070 | 3.092233  |
| H                   | 0.960355  | -4.643074 | -0.122440  | C                   | -2.846739 | 1.207405  | 3.226490  |
| H                   | -2.574269 | 1.230186  | 4.380962   | H                   | 1.376126  | -3.593285 | 3.354234  |
| H                   | 0.987857  | -5.833200 | -2.308369  | H                   | -2.974165 | 1.240031  | 4.317783  |





Benchmark, alternative structures, M06L/TZVP(SMD):

| <i>cis-5</i> |           |           |           | <i>trans-5</i> |           |           |           |
|--------------|-----------|-----------|-----------|----------------|-----------|-----------|-----------|
| H            | -4.663273 | 3.178523  | -4.497888 | H              | -8.186006 | -2.637363 | 2.484438  |
| H            | -3.205023 | 1.177921  | -4.432617 | H              | -6.664890 | -2.781468 | 0.534774  |
| C            | -4.585870 | 2.592711  | -3.590304 | C              | -7.165172 | -2.284271 | 2.564371  |
| C            | -3.767882 | 1.469636  | -3.554310 | C              | -6.312586 | -2.363422 | 1.469837  |
| H            | -5.941596 | 3.834490  | -2.483836 | H              | -7.364757 | -1.683616 | 4.614598  |
| C            | -5.302975 | 2.959870  | -2.461365 | C              | -6.705604 | -1.748989 | 3.757607  |
| H            | -6.084854 | -3.554925 | -2.392591 | H              | -2.225855 | -5.714683 | 3.633776  |
| C            | -3.668049 | 0.720107  | -2.393123 | C              | -5.010636 | -1.901513 | 1.568226  |
| H            | -5.692332 | -1.188602 | -1.855351 | H              | -3.554957 | -3.656701 | 3.424666  |
| H            | -3.021693 | -0.151438 | -2.367563 | H              | -4.350629 | -1.955690 | 0.709711  |
| C            | -5.447787 | -3.294137 | -1.556191 | C              | -1.730467 | -4.778152 | 3.408052  |
| C            | -5.209134 | 2.208162  | -1.297035 | C              | -5.396716 | -1.295602 | 3.862870  |
| C            | -5.226690 | -1.958889 | -1.251486 | C              | -2.480876 | -3.616589 | 3.286925  |
| H            | -5.025553 | -5.332952 | -1.035825 | H              | 0.229401  | -5.647633 | 3.338615  |
| C            | -4.395863 | 1.077528  | -1.254544 | C              | -4.539711 | -1.363327 | 2.766660  |
| C            | -4.853783 | -4.291065 | -0.794543 | C              | -0.353364 | -4.739412 | 3.243875  |
| H            | -5.773739 | 2.504161  | -0.420584 | H              | -5.048111 | -0.888279 | 4.804038  |
| H            | -0.971278 | 1.478312  | -1.083279 | H              | -0.761528 | 1.088197  | -1.024666 |
| H            | -2.095505 | 2.584683  | -0.719636 | H              | -2.016644 | 2.108391  | -0.946295 |
| C            | -4.404406 | -1.607570 | -0.179638 | C              | -1.855107 | -2.406770 | 2.991490  |
| N            | -1.352699 | 2.023366  | -0.313476 | N              | -1.258170 | 1.716977  | -0.398022 |
| C            | -4.034474 | -3.949385 | 0.272371  | C              | 0.275744  | -3.535148 | 2.955116  |
| P            | -4.112527 | 0.144640  | 0.301197  | P              | -2.782932 | -0.825382 | 2.866291  |
| C            | -3.806187 | -2.615660 | 0.575847  | C              | -0.469931 | -2.374017 | 2.824291  |
| H            | -3.563499 | -4.722973 | 0.866458  | H              | 1.350746  | -3.500566 | 2.826044  |
| C            | -0.294722 | 2.905379  | 0.226460  | C              | -0.340572 | 2.794174  | 0.043154  |
| H            | 1.254483  | 1.427063  | 0.262634  | H              | 1.301513  | 1.504505  | 0.517225  |
| H            | -7.019814 | -0.442349 | 0.106758  | H              | -1.940801 | -1.861937 | 5.539936  |
| C            | -5.568825 | 0.561812  | 1.343470  | C              | -2.647041 | -0.090147 | 4.542035  |
| Pt           | -2.097569 | 0.611791  | 1.241607  | Pt             | -2.022625 | 0.507040  | 1.229125  |
| C            | -6.857732 | 0.155762  | 0.996496  | C              | -2.226843 | -0.822394 | 5.649833  |
| H            | -3.153295 | -2.347253 | 1.398539  | H              | 0.014285  | -1.429114 | 2.594016  |
| H            | -0.773653 | 3.610569  | 0.906965  | H              | -0.948243 | 3.562509  | 0.522190  |
| C            | 0.730282  | 2.085417  | 0.960343  | C              | 0.665937  | 2.242220  | 1.015127  |
| H            | -4.373910 | 1.633104  | 2.761035  | H              | -3.318680 | 1.824031  | 3.836561  |
| C            | -5.379772 | 1.327523  | 2.491408  | C              | -3.008209 | 1.248255  | 4.701992  |
| H            | 1.477508  | 2.739502  | 1.410041  | H              | 1.317544  | 3.044386  | 1.362883  |
| C            | -7.938665 | 0.514416  | 1.786512  | C              | -2.170783 | -0.222616 | 6.900871  |
| H            | -8.936182 | 0.194352  | 1.511028  | H              | -1.837452 | -0.797286 | 7.756405  |
| H            | -2.502902 | -0.372158 | 2.405790  | H              | -3.212548 | -0.014870 | 0.288936  |
| S            | -0.035838 | 1.078112  | 2.302715  | S              | -0.161359 | 1.483741  | 2.474166  |
| C            | -6.464058 | 1.685873  | 3.280862  | C              | -2.960078 | 1.840791  | 5.953630  |
| C            | -7.742955 | 1.279941  | 2.929474  | C              | -2.540301 | 1.105719  | 7.054948  |
| H            | -6.306611 | 2.279162  | 4.173325  | H              | -3.242842 | 2.880065  | 6.068238  |
| H            | -8.588981 | 1.556110  | 3.547063  | H              | -2.495166 | 1.571232  | 8.031977  |
| H            | 0.173845  | 3.476703  | -0.581746 | H              | 0.151591  | 3.239852  | -0.827361 |

| <i>cis</i> -6 |           |           |           | <i>trans</i> -6 |           |           |           |
|---------------|-----------|-----------|-----------|-----------------|-----------|-----------|-----------|
| H             | -4.462703 | 3.552129  | -4.154165 | H               | -8.194848 | -2.655192 | 2.280348  |
| H             | -3.059241 | 1.512235  | -4.191734 | H               | -6.634830 | -2.619930 | 0.356566  |
| C             | -4.442928 | 2.891027  | -3.296611 | C               | -7.180628 | -2.297661 | 2.409626  |
| C             | -3.655306 | 1.746351  | -3.318197 | C               | -6.306392 | -2.275975 | 1.329700  |
| H             | -5.816358 | 4.076899  | -2.150663 | H               | -7.428615 | -1.870708 | 4.497778  |
| C             | -5.201474 | 3.185425  | -2.173020 | C               | -6.752050 | -1.856887 | 3.652033  |
| H             | -5.901727 | -3.432311 | -2.563602 | H               | -2.189185 | -5.734491 | 3.345132  |
| C             | -3.625407 | 0.902136  | -2.219505 | C               | -5.012983 | -1.808142 | 1.492225  |
| H             | -5.623873 | -1.091452 | -1.868315 | H               | -3.550197 | -3.686151 | 3.294950  |
| H             | -2.998156 | 0.016758  | -2.237504 | H               | -4.336019 | -1.783201 | 0.645693  |
| C             | -5.304459 | -3.200441 | -1.690158 | C               | -1.710897 | -4.777771 | 3.173991  |
| C             | -5.177311 | 2.339951  | -1.071461 | C               | -5.451649 | -1.398678 | 3.821249  |
| C             | -5.148507 | -1.879659 | -1.295998 | C               | -2.479071 | -3.622099 | 3.142865  |
| H             | -4.815075 | -5.249909 | -1.282361 | H               | 0.259012  | -5.611658 | 3.012298  |
| C             | -4.393132 | 1.187745  | -1.086899 | C               | -4.573253 | -1.365782 | 2.740554  |
| H             | 2.391944  | 5.005280  | -1.542250 | H               | 2.460388  | 5.131349  | -1.478394 |
| O             | 0.134665  | 3.571783  | -1.727970 | O               | 0.448961  | 3.400619  | -1.717804 |
| C             | -4.694846 | -4.219418 | -0.971129 | C               | -0.337484 | -4.707763 | 2.989181  |
| H             | -5.769759 | 2.580888  | -0.196289 | H               | -5.126360 | -1.067250 | 4.799826  |
| H             | -1.098749 | 1.674951  | -0.824116 | H               | -0.716040 | 1.522574  | -0.719955 |
| H             | -2.235864 | 2.730137  | -0.374110 | H               | -2.020205 | 2.467314  | -0.583160 |
| C             | 1.666129  | 5.617169  | -1.008308 | C               | 1.610046  | 5.716890  | -1.131474 |
| C             | -4.378050 | -1.565370 | -0.175281 | C               | -1.874502 | -2.386472 | 2.918560  |
| C             | 0.228605  | 3.823002  | -0.548544 | C               | 0.325473  | 3.830018  | -0.593858 |
| H             | 2.173494  | 6.390256  | -0.440102 | H               | 1.954302  | 6.610138  | -0.620179 |
| N             | -1.482095 | 2.153163  | -0.009194 | N               | -1.266403 | 2.051670  | -0.044217 |
| C             | -3.925951 | -3.914388 | 0.143295  | C               | 0.270288  | -3.478229 | 2.770097  |
| P             | -4.172869 | 0.162648  | 0.419283  | P               | -2.827618 | -0.817309 | 2.921176  |
| O             | 0.951701  | 4.825558  | -0.043909 | O               | 0.848562  | 4.978937  | -0.160489 |
| C             | -3.763348 | -2.594610 | 0.537089  | C               | -0.493252 | -2.321839 | 2.731594  |
| H             | -3.442874 | -4.705116 | 0.704100  | H               | 1.342084  | -3.419464 | 2.624710  |
| C             | -0.433557 | 3.019032  | 0.554009  | C               | -0.413282 | 3.116164  | 0.520345  |
| H             | 1.118926  | 1.536384  | 0.565500  | H               | 1.246474  | 1.839686  | 0.989002  |
| H             | -7.053483 | -0.418983 | -0.000810 | H               | -1.893701 | -2.029816 | 5.488367  |
| C             | -5.690332 | 0.479970  | 1.405911  | C               | -2.724815 | -0.227539 | 4.655553  |
| Pt            | -2.211449 | 0.645283  | 1.461323  | Pt              | -2.054352 | 0.671849  | 1.434567  |
| C             | -6.951419 | 0.097786  | 0.946874  | C               | -2.240115 | -1.023237 | 5.690560  |
| H             | -3.149845 | -2.353178 | 1.397619  | H               | -0.025874 | -1.356647 | 2.559531  |
| H             | -0.902909 | 3.701490  | 1.265050  | H               | -1.059421 | 3.826889  | 1.038490  |
| C             | 0.594000  | 2.170685  | 1.285445  | C               | 0.565166  | 2.514543  | 1.516168  |
| H             | -4.594564 | 1.432688  | 2.979569  | H               | -3.522848 | 1.696306  | 4.126004  |
| C             | -5.578602 | 1.143123  | 2.625420  | C               | -3.161121 | 1.068843  | 4.933679  |
| H             | 1.335061  | 2.815146  | 1.756870  | H               | 1.167285  | 3.308732  | 1.956117  |
| C             | -8.081109 | 0.377550  | 1.699103  | C               | -2.194756 | -0.528187 | 6.987253  |
| H             | -9.056581 | 0.075995  | 1.337507  | H               | -1.810539 | -1.151228 | 7.785642  |
| H             | -2.617543 | -0.405372 | 2.563583  | H               | -3.164803 | 0.169995  | 0.393859  |
| S             | -0.188071 | 1.133359  | 2.586635  | S               | -0.315207 | 1.627274  | 2.858056  |
| C             | -6.712144 | 1.422864  | 3.376645  | C               | -3.124098 | 1.555314  | 6.230339  |
| C             | -7.962713 | 1.040149  | 2.914907  | C               | -2.639045 | 0.757321  | 7.258985  |
| H             | -6.615382 | 1.937382  | 4.324858  | H               | -3.465397 | 2.562124  | 6.437454  |
| H             | -8.847311 | 1.255037  | 3.501968  | H               | -2.602155 | 1.141165  | 8.271151  |
| H             | 0.976341  | 6.066322  | -1.721532 | H               | 0.985430  | 5.987584  | -1.981665 |

| <i>cis-7</i> |           |           |           | <i>trans-7</i> |           |           |           |
|--------------|-----------|-----------|-----------|----------------|-----------|-----------|-----------|
| H            | -4.496724 | 3.728642  | -3.988234 | H              | -8.194906 | -2.611214 | 2.212942  |
| H            | -3.023075 | 1.739551  | -4.069435 | H              | -6.612342 | -2.500863 | 0.310474  |
| C            | -4.469098 | 3.038969  | -3.153648 | C              | -7.183200 | -2.256639 | 2.367642  |
| C            | -3.641878 | 1.923184  | -3.199635 | C              | -6.296261 | -2.192945 | 1.299648  |
| H            | -5.902863 | 4.136634  | -1.993895 | H              | -7.457114 | -1.908001 | 4.466988  |
| C            | -5.256864 | 3.268069  | -2.035113 | C              | -6.770452 | -1.861609 | 3.630555  |
| H            | -5.827192 | -3.289258 | -2.721521 | H              | -2.164945 | -5.711610 | 3.202593  |
| C            | -3.602803 | 1.042813  | -2.130414 | C              | -5.006103 | -1.729186 | 1.494922  |
| H            | -5.584801 | -0.981850 | -1.909574 | H              | -3.534505 | -3.669347 | 3.275893  |
| H            | -2.946093 | 0.179534  | -2.167753 | H              | -4.319073 | -1.671072 | 0.658058  |
| C            | -5.246555 | -3.094027 | -1.828110 | C              | -1.697471 | -4.747147 | 3.045695  |
| C            | -5.224073 | 2.385393  | -0.963120 | C              | -5.473003 | -1.407850 | 3.832442  |
| C            | -5.109509 | -1.792244 | -1.369102 | C              | -2.470329 | -3.595072 | 3.083959  |
| H            | -4.744767 | -5.156445 | -1.509968 | H              | 0.267828  | -5.564907 | 2.778258  |
| C            | -4.400842 | 1.261610  | -1.003880 | C              | -4.581944 | -1.333934 | 2.764452  |
| H            | 2.095927  | 5.121823  | -1.433019 | H              | 2.265249  | 5.294320  | -1.302555 |
| O            | 0.112598  | 3.712973  | -1.468395 | O              | 0.497658  | 3.621940  | -1.399090 |
| C            | -4.639528 | -4.140967 | -1.148053 | C              | -0.332530 | -4.663825 | 2.809310  |
| H            | -5.841172 | 2.574908  | -0.092276 | H              | -5.160053 | -1.112589 | 4.826554  |
| H            | -1.104376 | 1.779717  | -0.664625 | H              | -0.731032 | 1.753917  | -0.518121 |
| H            | -2.255843 | 2.803821  | -0.183750 | H              | -2.029353 | 2.697281  | -0.326497 |
| H            | 1.417097  | 7.506560  | -1.773907 | H              | 1.384099  | 7.463347  | -2.195247 |
| H            | -0.000387 | 6.459819  | -1.745659 | H              | 0.124716  | 6.230691  | -2.205822 |
| C            | 1.689863  | 5.732690  | -0.626221 | C              | 1.645194  | 5.962814  | -0.704688 |
| C            | -4.360987 | -1.525416 | -0.221215 | C              | -1.879536 | -2.348966 | 2.879678  |
| C            | 0.210702  | 3.910897  | -0.278175 | C              | 0.345863  | 4.026985  | -0.268411 |
| H            | 2.513900  | 6.107261  | -0.021987 | H              | 2.289687  | 6.551144  | -0.054369 |
| N            | -1.503791 | 2.215436  | 0.166264  | N              | -1.277459 | 2.247556  | 0.187182  |
| C            | 0.823120  | 6.843986  | -1.144606 | C              | 0.765960  | 6.829403  | -1.559770 |
| C            | -3.892608 | -3.883021 | -0.007070 | C              | 0.261336  | -3.424733 | 2.608179  |
| P            | -4.180757 | 0.174019  | 0.457861  | P              | -2.839772 | -0.787358 | 2.980966  |
| O            | 0.951639  | 4.867927  | 0.281321  | O              | 0.854947  | 5.159589  | 0.215913  |
| C            | -3.748935 | -2.582231 | 0.451814  | C              | -0.507463 | -2.271366 | 2.639758  |
| H            | -3.411687 | -4.695528 | 0.523664  | H              | 1.326114  | -3.355708 | 2.421652  |
| C            | -0.467885 | 3.061587  | 0.781478  | C              | -0.415478 | 3.274574  | 0.806378  |
| H            | 1.094060  | 1.589556  | 0.758678  | H              | 1.226385  | 1.957747  | 1.224851  |
| H            | -7.037125 | -0.534063 | 0.048354  | H              | -1.926160 | -2.161326 | 5.475315  |
| H            | 0.411364  | 7.436470  | -0.327805 | H              | 0.137614  | 7.477232  | -0.948879 |
| C            | -5.709449 | 0.429044  | 1.445351  | C              | -2.741188 | -0.305939 | 4.748825  |
| Pt           | -2.239709 | 0.629439  | 1.548550  | Pt             | -2.072415 | 0.790001  | 1.584975  |
| C            | -6.955009 | -0.004823 | 0.990855  | C              | -2.268453 | -1.166918 | 5.736184  |
| H            | -3.152484 | -2.376922 | 1.333434  | H              | -0.051217 | -1.298651 | 2.482191  |
| H            | -0.951644 | 3.714645  | 1.510458  | H              | -1.055857 | 3.969336  | 1.352133  |
| C            | 0.551087  | 2.188542  | 1.495329  | C              | 0.549037  | 2.614819  | 1.778986  |
| H            | -4.649185 | 1.428693  | 3.014873  | H              | -3.522388 | 1.652106  | 4.333286  |
| C            | -5.622102 | 1.102071  | 2.661828  | C              | -3.170912 | 0.973805  | 5.103544  |
| H            | 1.278664  | 2.817098  | 2.007378  | H              | 1.157536  | 3.379837  | 2.260169  |
| C            | -8.094217 | 0.236094  | 1.742534  | C              | -2.229395 | -0.752717 | 7.061067  |
| H            | -9.057405 | -0.105981 | 1.384094  | H              | -1.854154 | -1.426108 | 7.822016  |
| H            | -2.647758 | -0.485745 | 2.584595  | H              | -3.173202 | 0.340123  | 0.508608  |
| S            | -0.245605 | 1.089338  | 2.735216  | S              | -0.349134 | 1.673229  | 3.071077  |
| C            | -6.764832 | 1.343252  | 3.412122  | C              | -3.140481 | 1.379445  | 6.427903  |
| C            | -8.000506 | 0.910661  | 2.953635  | C              | -2.668156 | 0.516431  | 7.408689  |
| H            | -6.687048 | 1.865538  | 4.357836  | H              | -3.477084 | 2.373889  | 6.694059  |
| H            | -8.892206 | 1.095233  | 3.540282  | H              | -2.636263 | 0.836670  | 8.442961  |

| <i>cis</i> -8 |           |           |           | <i>trans</i> -8 |           |           |           |
|---------------|-----------|-----------|-----------|-----------------|-----------|-----------|-----------|
| H             | -6.419311 | 0.120591  | -4.230116 | H               | 2.714959  | -2.615463 | -5.057851 |
| H             | -4.995362 | 2.089773  | -3.744319 | H               | 0.765158  | -1.091279 | -4.976911 |
| C             | -5.444307 | -0.012263 | -3.777095 | C               | 2.396854  | -2.190276 | -4.113816 |
| C             | -4.645613 | 1.092514  | -3.506735 | C               | 1.302750  | -1.335245 | -4.068772 |
| H             | -5.607018 | -2.150411 | -3.669792 | H               | 3.931855  | -3.166621 | -2.975076 |
| C             | -4.990284 | -1.284136 | -3.462539 | C               | 3.078858  | -2.499601 | -2.946775 |
| H             | -7.732034 | 1.849203  | -1.130927 | H               | -7.055737 | 3.340667  | 0.461963  |
| C             | -3.402608 | 0.924205  | -2.919672 | C               | 0.888128  | -0.800057 | -2.860084 |
| H             | -2.790150 | 1.792597  | -2.700297 | H               | 0.026515  | -0.142624 | -2.824825 |
| H             | -6.804036 | 4.133855  | -1.344492 | H               | -5.469284 | 5.210875  | 0.140529  |
| C             | -3.736399 | -1.457538 | -2.889021 | C               | 2.673939  | -1.954783 | -1.735290 |
| C             | -6.729167 | 2.064040  | -0.781546 | C               | -5.989482 | 3.150695  | 0.443499  |
| C             | -6.207894 | 3.343722  | -0.904493 | C               | -5.097784 | 4.200802  | 0.263205  |
| C             | -2.930151 | -0.355737 | -2.614637 | C               | 1.573288  | -1.101714 | -1.682637 |
| H             | -3.388930 | -2.457825 | -2.660828 | H               | 3.220377  | -2.196023 | -0.831497 |
| H             | -6.386646 | 0.051996  | -0.141677 | H               | -6.218232 | 1.039435  | 0.734761  |
| H             | -3.968466 | -4.690342 | -0.303539 | H               | -5.710133 | -1.907622 | -3.171107 |
| H             | -1.401097 | 0.063458  | -4.684537 | H               | 3.001305  | 1.047003  | -1.913045 |
| C             | -5.968633 | 1.047986  | -0.217833 | C               | -5.517519 | 1.856369  | 0.598145  |
| H             | 0.136044  | 1.187963  | -6.228395 | H               | 3.890038  | 3.340572  | -1.940587 |
| H             | -6.174436 | -5.025248 | 0.777113  | H               | -7.248966 | -3.386239 | -1.915177 |
| H             | -1.053181 | -2.237597 | -4.169724 | H               | 3.571773  | 0.367691  | 1.320014  |
| C             | -4.460070 | -3.868569 | 0.204316  | C               | -5.675913 | -1.934589 | -2.088922 |
| C             | -4.912837 | 3.604679  | -0.474978 | C               | -3.732643 | 3.954712  | 0.235704  |
| H             | -4.492925 | 4.597541  | -0.580586 | H               | -3.034552 | 4.770368  | 0.092018  |
| H             | 0.316015  | 0.327616  | 0.252452  | H               | -1.550896 | -0.393404 | -1.220034 |
| C             | -5.693042 | -4.055520 | 0.811410  | C               | -6.539295 | -2.764246 | -1.383649 |
| H             | -2.873439 | -2.480420 | -0.202173 | H               | -4.081811 | -0.507165 | -1.963490 |
| C             | -0.487712 | 0.501433  | -4.299840 | C               | 2.659035  | 1.763231  | -1.175433 |
| C             | -3.846072 | -2.625123 | 0.253876  | C               | -4.762019 | -1.146006 | -1.410435 |
| C             | 0.380400  | 1.137443  | -5.174269 | C               | 3.162396  | 3.057160  | -1.189841 |
| C             | -4.673896 | 1.303820  | 0.227371  | C               | -4.145934 | 1.602153  | 0.569413  |
| C             | -6.305705 | -2.999275 | 1.474782  | C               | -6.488240 | -2.796296 | 0.001463  |
| C             | -4.147293 | 2.590342  | 0.077936  | C               | -3.257214 | 2.659448  | 0.384663  |
| C             | -0.746867 | -2.814030 | -3.303923 | C               | 3.218573  | -0.592696 | 1.677035  |
| H             | -7.262498 | -3.145064 | 1.961150  | H               | -7.158866 | -3.441155 | 0.556083  |
| H             | -0.320892 | -4.568256 | -4.455073 | H               | 4.853325  | -0.841612 | 3.039739  |
| P             | -1.301565 | -0.492339 | -1.776212 | P               | 1.031949  | -0.310302 | -0.115400 |
| C             | -4.459158 | -1.554996 | 0.898340  | C               | -4.708306 | -1.169519 | -0.015458 |
| C             | -0.193423 | 0.428516  | -2.935828 | C               | 1.719486  | 1.389469  | -0.216746 |
| C             | -5.692723 | -1.756788 | 1.523002  | C               | -5.579280 | -2.000354 | 0.686576  |
| Pt            | -1.284333 | 0.196490  | 0.415107  | Pt              | -1.247285 | -0.271960 | 0.350150  |
| C             | -0.335107 | -4.127265 | -3.465860 | C               | 3.942716  | -1.275936 | 2.645331  |
| H             | -3.122739 | 2.787284  | 0.379891  | H               | -2.191087 | 2.454598  | 0.352573  |
| C             | 1.553933  | 1.708148  | -4.701162 | C               | 2.738217  | 3.982169  | -0.246909 |
| H             | 2.229515  | 2.207777  | -5.384705 | H               | 3.132160  | 4.991074  | -0.261572 |
| C             | -0.774148 | -2.237355 | -2.033137 | C               | 2.042289  | -1.139223 | 1.170104  |
| P             | -3.579369 | 0.047028  | 0.996793  | P               | -3.493495 | -0.094426 | 0.825901  |
| H             | -6.174869 | -0.942383 | 2.051474  | H               | -5.556421 | -2.033039 | 1.768622  |
| C             | 0.986122  | 1.006188  | -2.471347 | C               | 1.293055  | 2.325233  | 0.727592  |
| C             | 1.854427  | 1.639519  | -3.348883 | C               | 1.805365  | 3.612975  | 0.713905  |
| C             | 0.058963  | -4.875603 | -2.363014 | C               | 3.502858  | -2.508560 | 3.105705  |
| C             | -0.370937 | -2.991811 | -0.933502 | C               | 1.600142  | -2.375336 | 1.644003  |
| H             | 1.220698  | 0.963801  | -1.414850 | H               | 0.562056  | 2.029627  | 1.475146  |
| H             | 2.765980  | 2.085395  | -2.969899 | H               | 4.069053  | -3.038434 | 3.862013  |
| H             | -0.388372 | -2.536519 | 0.052283  | H               | 1.471130  | 4.331451  | 1.452522  |
| C             | -3.657907 | 0.428360  | 2.811585  | H               | 0.674968  | -2.794809 | 1.263260  |
| H             | -4.672243 | 0.734263  | 3.081609  | C               | -3.696286 | -0.381257 | 2.634472  |
| C             | 0.043043  | -4.306731 | -1.098151 | H               | -4.690192 | -0.059313 | 2.959458  |
| S             | -0.938254 | 1.054364  | 2.600407  | C               | 2.331351  | -3.059061 | 2.601569  |
| H             | -2.925044 | 2.452173  | 2.800510  | S               | -0.914237 | -0.131146 | 2.773670  |
| H             | -3.443343 | -0.514535 | 3.319935  | H               | -2.725319 | 1.433319  | 3.262107  |
| C             | -2.638243 | 1.472445  | 3.188413  | H               | -3.609238 | -1.457322 | 2.801656  |
| H             | 0.353638  | -4.884531 | -0.236313 | C               | -2.593716 | 0.353042  | 3.364641  |
| H             | -2.580051 | 1.564942  | 4.274179  | H               | 1.980750  | -4.018151 | 2.962596  |
| H             | 0.381020  | -5.901706 | -2.492613 | H               | -2.638705 | 0.126032  | 4.430509  |

| <i>cis-9</i> |           |           |           | <i>trans-9</i> |           |           |           |
|--------------|-----------|-----------|-----------|----------------|-----------|-----------|-----------|
| H            | 2.608026  | -3.954859 | -5.175923 | H              | 2.836402  | 1.077203  | -5.499039 |
| H            | 2.058628  | -1.589448 | -4.692744 | H              | 0.701430  | 1.718989  | -4.419154 |
| C            | 2.246172  | -3.669796 | -4.195508 | C              | 2.661495  | 0.839241  | -4.456880 |
| H            | -5.760221 | 1.410254  | -4.007376 | H              | -4.955589 | 1.640530  | -4.202075 |
| H            | -4.171784 | 2.115770  | -4.296060 | H              | -3.298859 | 2.239958  | -4.187254 |
| H            | 2.316095  | -5.670291 | -3.416570 | H              | 4.568432  | -0.110984 | -4.193267 |
| H            | -4.319134 | 0.396625  | -3.943025 | H              | -3.617739 | 0.528067  | -3.915911 |
| C            | 1.939096  | -2.344161 | -3.925112 | C              | 1.464162  | 1.198609  | -3.852090 |
| C            | -4.714911 | 1.383326  | -3.692759 | C              | -3.986149 | 1.535548  | -3.710466 |
| H            | -2.899245 | -3.135434 | -4.073478 | H              | -2.652652 | -3.291225 | -3.875505 |
| C            | 2.081912  | -4.633319 | -3.208931 | C              | 3.633219  | 0.170838  | -3.725034 |
| H            | -5.355090 | -3.436230 | -3.978551 | H              | -5.118061 | -3.331769 | -4.085199 |
| C            | -3.458034 | -2.789168 | -3.212385 | C              | -3.271904 | -2.857904 | -3.099703 |
| C            | -4.834966 | -2.954979 | -3.159342 | C              | -4.654199 | -2.880083 | -3.216792 |
| H            | -6.171878 | 3.130637  | -2.113237 | H              | -5.606663 | 3.324741  | -2.353203 |
| H            | -4.588901 | 3.813992  | -2.437079 | H              | -3.960848 | 3.931950  | -2.367726 |
| C            | 1.468590  | -1.980718 | -2.671497 | C              | 1.236553  | 0.887181  | -2.520575 |
| C            | -4.566676 | 1.683475  | -2.213058 | C              | -4.081001 | 1.797248  | -2.219204 |
| C            | -5.114460 | 3.055705  | -1.842610 | C              | -4.619156 | 3.186477  | -1.903389 |
| C            | 1.612603  | -4.273199 | -1.954784 | C              | 3.412569  | -0.138582 | -2.390072 |
| H            | 1.214645  | -0.947849 | -2.458371 | H              | 0.303061  | 1.163530  | -2.039438 |
| H            | -2.542051 | 2.364891  | -2.340324 | H              | -2.033430 | 2.374762  | -1.979374 |
| H            | -5.135737 | 0.928180  | -1.652980 | H              | -4.773230 | 1.061174  | -1.786651 |
| H            | -1.719172 | -2.021315 | -2.203880 | H              | -1.596680 | -2.241852 | -1.895908 |
| C            | -2.794694 | -2.169383 | -2.163215 | C              | -2.677305 | -2.274689 | -1.989319 |
| C            | -5.548225 | -2.494128 | -2.059719 | C              | -5.444352 | -2.319781 | -2.220806 |
| H            | -6.623971 | -2.614086 | -2.020605 | H              | -6.523766 | -2.335909 | -2.309044 |
| H            | -2.665550 | 0.647446  | -2.070763 | H              | -2.284073 | 0.658425  | -1.790749 |
| C            | 1.305531  | -2.939970 | -1.672396 | C              | 2.211220  | 0.217378  | -1.779158 |
| H            | 1.477472  | -5.035003 | -1.195695 | H              | 4.178356  | -0.658016 | -1.825490 |
| C            | -3.105536 | 1.607754  | -1.783386 | C              | -2.720029 | 1.634960  | -1.550151 |
| C            | -4.926495 | 3.342027  | -0.363861 | C              | -4.682973 | 3.418768  | -0.404706 |
| H            | -5.295683 | 4.342823  | -0.120394 | H              | -5.046628 | 4.428392  | -0.191243 |
| C            | -3.498639 | -1.718226 | -1.047942 | C              | -3.462779 | -1.711821 | -0.985464 |
| C            | -4.885369 | -1.876648 | -1.009298 | C              | -4.853399 | -1.740046 | -1.108632 |
| H            | -2.896834 | 3.948847  | -0.513210 | H              | -2.635008 | 3.929972  | -0.178484 |
| H            | -5.546654 | 2.647288  | 0.213289  | H              | -5.423933 | 2.736693  | 0.027164  |
| C            | -2.870000 | 1.851988  | -0.289690 | C              | -2.730080 | 1.830622  | -0.030045 |
| C            | -3.467461 | 3.230143  | 0.091167  | C              | -3.332037 | 3.221961  | 0.290309  |
| P            | 0.692883  | -2.399873 | -0.024687 | P              | 1.869637  | -0.132146 | -0.009020 |
| H            | -5.449268 | -1.516050 | -0.155756 | H              | -5.477535 | -1.311605 | -0.331736 |
| H            | -4.512085 | 0.599772  | 0.442150  | H              | -4.529679 | 0.638950  | 0.372170  |
| Pt           | -0.309450 | -0.335109 | -0.041264 | Pt             | -0.391910 | -0.562284 | 0.306412  |
| S            | -1.007587 | 1.929955  | -0.024743 | S              | -0.949150 | 1.804704  | 0.562995  |
| P            | -2.576448 | -0.880830 | 0.295697  | P              | -2.663327 | -0.927640 | 0.463370  |
| C            | -3.433967 | 0.731954  | 0.576329  | C              | -3.483631 | 0.711285  | 0.685732  |
| H            | -3.729624 | 5.736535  | 1.234896  | H              | -3.682031 | 5.704044  | 1.467399  |
| H            | -2.012172 | 5.354709  | 1.131824  | H              | -1.990487 | 5.240141  | 1.640953  |
| H            | -4.145737 | -3.378831 | 0.982181  | H              | -4.017726 | -3.568698 | 0.806442  |
| C            | -2.934556 | 5.121410  | 1.666932  | C              | -2.999958 | 5.037477  | 2.003620  |
| C            | -3.275337 | 3.640679  | 1.572343  | C              | -3.382717 | 3.578689  | 1.796718  |
| H            | -5.320891 | 3.958136  | 2.255898  | H              | -5.500372 | 3.976712  | 2.131193  |
| H            | -3.261911 | 0.961092  | 1.629367  | H              | -3.478982 | 0.896268  | 1.760545  |
| H            | -2.409531 | 3.080004  | 1.942304  | H              | -2.618432 | 2.965904  | 2.288116  |
| C            | -3.727382 | -2.959591 | 1.888926  | C              | -3.819986 | -3.154458 | 1.787710  |
| C            | -2.962226 | -1.798299 | 1.837762  | C              | -3.218433 | -1.904225 | 1.912032  |
| C            | -4.456824 | 3.330209  | 2.485591  | C              | -4.717336 | 3.299350  | 2.480253  |
| H            | -4.785540 | 2.292083  | 2.425990  | H              | -5.075762 | 2.281253  | 2.323794  |
| H            | -2.806915 | 5.439671  | 2.703737  | H              | -3.036630 | 5.317925  | 3.058435  |
| H            | -4.549296 | -4.500453 | 3.128824  | H              | -4.637695 | -4.848485 | 2.811444  |
| H            | -4.189631 | 3.525993  | 3.525929  | H              | -4.626513 | 3.448159  | 3.558016  |
| C            | -3.954831 | -3.594894 | 3.103746  | C              | -4.167777 | -3.878573 | 2.920298  |
| C            | -2.405833 | -1.298663 | 3.020082  | C              | -2.951846 | -1.399933 | 3.187294  |
| H            | -1.784511 | -0.408268 | 2.986601  | H              | -2.454880 | -0.441402 | 3.298305  |
| C            | -3.417520 | -3.082322 | 4.274256  | C              | -3.916104 | -3.364440 | 4.183361  |
| C            | -2.637566 | -1.932675 | 4.229509  | C              | -3.304758 | -2.123735 | 4.314394  |
| H            | -3.596936 | -3.581053 | 5.218881  | H              | -4.188825 | -3.930896 | 5.065262  |
| H            | -2.205001 | -1.531463 | 5.137949  | H              | -3.096121 | -1.720908 | 5.297924  |
| H            | 1.199913  | 0.227354  | -0.238637 | H              | -0.108426 | -2.140127 | 0.187582  |

|   |           |           |           |   |          |           |           |
|---|-----------|-----------|-----------|---|----------|-----------|-----------|
| C | -0.282739 | -3.848565 | 0.558096  | C | 3.079486 | -1.446890 | 0.418220  |
| C | -1.140638 | -4.515477 | -0.318339 | C | 2.834743 | -2.747679 | -0.023228 |
| C | -0.227976 | -4.257676 | 1.890522  | C | 4.249148 | -1.177096 | 1.125680  |
| C | -1.910825 | -5.581075 | 0.123028  | C | 3.747605 | -3.757733 | 0.231965  |
| H | -1.190399 | -4.217811 | -1.358454 | H | 1.922968 | -2.965646 | -0.568470 |
| C | -0.998488 | -5.325538 | 2.328752  | C | 5.156419 | -2.194847 | 1.390363  |
| H | 0.425512  | -3.747897 | 2.589260  | H | 4.457895 | -0.171461 | 1.470256  |
| C | -1.837828 | -5.992102 | 1.447094  | C | 4.909418 | -3.483853 | 0.943248  |
| H | -2.564772 | -6.092831 | -0.573355 | H | 3.548155 | -4.763119 | -0.118176 |
| H | -0.942811 | -5.634315 | 3.365664  | H | 6.059941 | -1.974947 | 1.945950  |
| H | -2.436809 | -6.826314 | 1.791604  | H | 5.618666 | -4.275946 | 1.150047  |
| C | 2.161504  | -2.443399 | 1.085704  | C | 2.480589 | 1.345538  | 0.887682  |
| C | 3.200804  | -3.356007 | 0.915235  | C | 3.219108 | 2.351617  | 0.270646  |
| C | 2.199056  | -1.562078 | 2.165469  | C | 2.166469 | 1.458170  | 2.243151  |
| C | 4.262063  | -3.381337 | 1.808212  | C | 3.639533 | 3.454858  | 1.002052  |
| H | 3.192841  | -4.044563 | 0.079038  | H | 3.463551 | 2.280534  | -0.782674 |
| C | 3.256534  | -1.596096 | 3.062670  | C | 2.597481 | 2.554488  | 2.971919  |
| H | 1.394888  | -0.843166 | 2.290036  | H | 1.575743 | 0.684569  | 2.722803  |
| C | 4.289669  | -2.505492 | 2.885011  | C | 3.332686 | 3.556557  | 2.350914  |
| H | 5.069287  | -4.088548 | 1.661155  | H | 4.207439 | 4.237088  | 0.513228  |
| H | 3.275405  | -0.906557 | 3.897806  | H | 2.349594 | 2.632547  | 4.023377  |
| H | 5.119491  | -2.527843 | 3.580927  | H | 3.660167 | 4.419217  | 2.918254  |

| <i>cis</i> -10 |           |           |           | <i>trans</i> -10 |           |           |           |
|----------------|-----------|-----------|-----------|------------------|-----------|-----------|-----------|
| H              | 3.674006  | -4.195803 | -4.734777 | H                | 3.329890  | -1.192215 | -5.595783 |
| H              | 3.290349  | -1.774074 | -4.389198 | H                | 1.291821  | -2.204283 | -4.621121 |
| C              | 3.090257  | -3.852504 | -3.889362 | C                | 3.058002  | -0.984452 | -4.568026 |
| H              | 2.711313  | -5.830509 | -3.143975 | H                | 4.738322  | 0.306731  | -4.219671 |
| C              | 2.876073  | -2.495325 | -3.695309 | C                | 1.916000  | -1.552839 | -4.021664 |
| H              | -3.884760 | -2.426045 | -4.240021 | H                | -3.204873 | -0.122784 | -4.366860 |
| C              | 2.549645  | -4.769282 | -2.998627 | C                | 3.848456  | -0.143285 | -3.796609 |
| H              | -6.120590 | -3.271617 | -3.593504 | H                | -5.419172 | -1.223510 | -4.486673 |
| C              | -4.218129 | -2.354017 | -3.212056 | C                | -3.657417 | -0.534432 | -3.473046 |
| C              | -5.471834 | -2.825355 | -2.849607 | C                | -4.898839 | -1.151232 | -3.539370 |
| C              | 2.122058  | -2.054945 | -2.617642 | C                | 1.563801  | -1.282591 | -2.707626 |
| C              | 1.797930  | -4.331963 | -1.917890 | C                | 3.500465  | 0.128200  | -2.481769 |
| H              | 1.944706  | -0.995843 | -2.474748 | H                | 0.666464  | -1.716165 | -2.279907 |
| H              | -2.399397 | -1.429094 | -2.531190 | H                | -2.008107 | 0.015616  | -2.205606 |
| C              | -3.385795 | -1.791176 | -2.255663 | C                | -2.986878 | -0.451789 | -2.261447 |
| C              | -5.895909 | -2.720766 | -1.531271 | C                | -5.471159 | -1.682336 | -2.390859 |
| H              | -6.877184 | -3.079307 | -1.245264 | H                | -6.438700 | -2.166886 | -2.439494 |
| C              | 1.578361  | -2.967464 | -1.714828 | C                | 2.356090  | -0.444143 | -1.923574 |
| H              | 1.381621  | -5.058818 | -1.230221 | H                | 4.119136  | 0.792658  | -1.889707 |
| C              | -5.115484 | 3.106219  | 0.161745  | C                | -4.781693 | 3.304172  | 1.336972  |
| H              | -5.443343 | 4.118537  | 0.408357  | H                | -5.100776 | 4.206177  | 1.863958  |
| C              | -3.796471 | -1.690036 | -0.925275 | C                | -3.557492 | -0.977619 | -1.101928 |
| C              | -5.068577 | -2.150902 | -0.575277 | C                | -4.807458 | -1.594108 | -1.176474 |
| H              | -3.463226 | 3.774712  | -1.069161 | H                | -2.838390 | 4.105592  | 0.815738  |
| C              | -3.128236 | 1.717137  | -0.532269 | C                | -2.770516 | 1.964280  | 0.614549  |
| C              | -3.639959 | 3.116868  | -0.215289 | C                | -3.260538 | 3.227983  | 1.310340  |
| P              | 0.629344  | -2.353919 | -0.256107 | P                | 1.875178  | -0.146713 | -0.174933 |
| H              | -5.416231 | -2.066965 | 0.446754  | H                | -5.262342 | -2.009986 | -0.284722 |
| Pt             | -0.482962 | -0.373274 | -0.552502 | Pt               | -0.405173 | -0.418061 | 0.199516  |
| S              | -1.322353 | 1.806552  | -0.943148 | S                | -0.918008 | 1.924340  | 0.607523  |
| P              | -2.646635 | -0.888231 | 0.255748  | P                | -2.660668 | -0.779965 | 0.485253  |
| C              | -3.406139 | 0.772809  | 0.630526  | C                | -3.383118 | 0.732922  | 1.278651  |
| H              | -3.803666 | -3.536329 | 1.157867  | H                | -2.774930 | -3.618110 | -0.076852 |
| H              | -2.825688 | 1.128925  | 1.491882  | H                | -3.009748 | 0.700830  | 2.310565  |
| C              | -3.355455 | -3.035506 | 2.006015  | C                | -3.099884 | -3.491456 | 0.950221  |
| C              | -2.768654 | -1.781849 | 1.851884  | C                | -3.181924 | -2.209770 | 1.499590  |
| H              | -3.814841 | -4.640247 | 3.345943  | H                | -3.365567 | -5.590248 | 1.269087  |
| C              | -3.353980 | -3.664849 | 3.244168  | C                | -3.429643 | -4.602374 | 1.708437  |
| C              | -2.152535 | -1.185673 | 2.957377  | C                | -3.580706 | -2.065637 | 2.827302  |
| H              | -1.663018 | -0.223231 | 2.849502  | H                | -3.637925 | -1.083203 | 3.279852  |
| C              | -2.756489 | -3.058788 | 4.338483  | C                | -3.835785 | -4.450091 | 3.028495  |
| C              | -2.149426 | -1.817786 | 4.190044  | C                | -3.907348 | -3.182280 | 3.585343  |
| H              | -2.755149 | -3.553120 | 5.302179  | H                | -4.091407 | -5.319464 | 3.621679  |
| H              | -1.669428 | -1.340874 | 5.036009  | H                | -4.218153 | -3.056813 | 4.615320  |
| H              | 0.941681  | 0.196126  | -1.074609 | H                | -0.142779 | -1.990829 | -0.033439 |
| C              | -0.389612 | -3.821435 | 0.172008  | C                | 2.919836  | -1.292180 | 0.809681  |
| C              | -1.349500 | -4.229135 | -0.757226 | C                | 4.249153  | -1.545444 | 0.472911  |
| C              | -0.247004 | -4.533900 | 1.359077  | C                | 2.377989  | -1.884634 | 1.948388  |
| C              | -2.138748 | -5.340894 | -0.512097 | C                | 5.021759  | -2.381613 | 1.264312  |
| H              | -1.465507 | -3.680153 | -1.685504 | H                | 4.683901  | -1.092521 | -0.410764 |
| C              | -1.039747 | -5.649256 | 1.602034  | C                | 3.155950  | -2.714994 | 2.742824  |
| H              | 0.483553  | -4.223926 | 2.097072  | H                | 1.340191  | -1.693370 | 2.201586  |
| C              | -1.980827 | -6.057542 | 0.668777  | C                | 4.477108  | -2.965030 | 2.401146  |
| H              | -2.876826 | -5.647526 | -1.244297 | H                | 6.051698  | -2.578298 | 0.992478  |
| H              | -0.921220 | -6.195934 | 2.529948  | H                | 2.726251  | -3.169834 | 3.626973  |
| H              | -2.594616 | -6.928899 | 0.862498  | H                | 5.082870  | -3.617928 | 3.017724  |
| C              | 1.881973  | -2.278397 | 1.087221  | C                | 2.571051  | 1.508305  | 0.197499  |
| C              | 2.944724  | -3.178252 | 1.162457  | C                | 2.268512  | 2.574616  | -0.652313 |
| C              | 1.733289  | -1.313630 | 2.081736  | C                | 3.298438  | 1.750602  | 1.360847  |
| C              | 3.839058  | -3.114969 | 2.220311  | C                | 2.707520  | 3.853965  | -0.352745 |
| H              | 3.076621  | -3.931057 | 0.393715  | H                | 1.687229  | 2.401451  | -1.551038 |
| C              | 2.625149  | -1.256783 | 3.143044  | C                | 3.730275  | 3.035635  | 1.660806  |
| H              | 0.916997  | -0.602073 | 2.007155  | H                | 3.531885  | 0.935786  | 2.036156  |
| C              | 3.678803  | -2.157057 | 3.213204  | C                | 3.437737  | 4.087784  | 0.805581  |
| H              | 4.663904  | -3.815406 | 2.269107  | H                | 2.471101  | 4.672445  | -1.021660 |
| H              | 2.501273  | -0.502000 | 3.910054  | H                | 4.296765  | 3.212222  | 2.567079  |
| H              | 4.380077  | -2.108546 | 4.037370  | H                | 3.775589  | 5.089586  | 1.041089  |
| C              | -5.377199 | 2.160984  | 1.323017  | C                | -5.385413 | 2.066968  | 1.981893  |
| C              | -4.885575 | 0.755882  | 1.000102  | C                | -4.907716 | 0.800638  | 1.283821  |
| H              | -5.710320 | 2.790756  | -0.702859 | H                | -5.158389 | 3.395964  | 0.312101  |
| H              | -6.441653 | 2.134966  | 1.566686  | H                | -6.476448 | 2.114452  | 1.960110  |
| H              | -4.862276 | 2.529922  | 2.217001  | H                | -5.096965 | 2.027896  | 3.038546  |



|   |           |          |           |   |           |           |           |
|---|-----------|----------|-----------|---|-----------|-----------|-----------|
| H | -5.465606 | 0.363305 | 0.158726  | H | -5.269987 | 0.800315  | 0.250044  |
| H | -5.056572 | 0.080122 | 1.843028  | H | -5.329297 | -0.088186 | 1.761009  |
| H | -3.050974 | 3.521025 | 0.615837  | H | -2.872330 | 3.231818  | 2.335172  |
| H | -3.657184 | 1.341387 | -1.417325 | H | -3.107240 | 1.990400  | -0.429744 |

| <i>cis-11-chair</i> |           |           |           | <i>trans-11-chair</i> |           |           |           |
|---------------------|-----------|-----------|-----------|-----------------------|-----------|-----------|-----------|
| H                   | 2.743851  | -0.767926 | -5.262819 | H                     | 2.681342  | -0.531160 | -5.208310 |
| H                   | 1.290861  | 1.064502  | -4.445518 | H                     | 1.251816  | 1.337438  | -4.433953 |
| C                   | 2.462062  | -0.723124 | -4.217950 | C                     | 2.395818  | -0.461837 | -4.165786 |
| C                   | 1.646089  | 0.304877  | -3.759913 | C                     | 1.593085  | 0.586608  | -3.731795 |
| H                   | 3.546424  | -2.495628 | -3.683932 | H                     | 3.451759  | -2.239736 | -3.592907 |
| C                   | 2.910692  | -1.691385 | -3.333886 | C                     | 2.826704  | -1.419582 | -3.261140 |
| H                   | 3.361094  | 0.432658  | 5.228063  | H                     | -7.346907 | 1.630437  | -1.625352 |
| C                   | 1.277085  | 0.356748  | -2.426417 | C                     | 1.219191  | 0.670421  | -2.401035 |
| H                   | 0.628950  | 1.152879  | -2.075526 | H                     | 0.583731  | 1.484100  | -2.068022 |
| H                   | 3.685131  | -1.932774 | 5.895346  | H                     | -6.277112 | 3.669930  | -2.529869 |
| C                   | 2.550747  | -1.636099 | -1.992470 | C                     | 2.464130  | -1.331329 | -1.922702 |
| C                   | 2.614166  | -0.311968 | 4.979536  | C                     | -6.333991 | 1.886018  | -1.338643 |
| C                   | 2.795015  | -1.636364 | 5.353924  | C                     | -5.733589 | 3.029117  | -1.846307 |
| C                   | 1.727472  | -0.613546 | -1.529599 | C                     | 1.655925  | -0.286045 | -1.482576 |
| H                   | 2.916318  | -2.395314 | -1.311680 | H                     | 2.815758  | -2.080520 | -1.223653 |
| H                   | 1.329360  | 1.108606  | 4.027798  | H                     | -6.118424 | 0.171289  | -0.073778 |
| H                   | -2.353305 | 4.405669  | 2.891898  | H                     | -3.896237 | -4.332808 | -0.272359 |
| H                   | 4.057975  | 0.361296  | -0.220613 | H                     | 3.684136  | 1.158194  | -0.677062 |
| C                   | 1.470006  | 0.067807  | 4.293588  | C                     | -5.639472 | 1.061808  | -0.463763 |
| H                   | 5.350565  | 2.339774  | 0.468353  | H                     | 5.011440  | 3.052001  | 0.162543  |
| H                   | -2.306396 | 4.692346  | 5.349893  | H                     | -5.922844 | -4.740365 | 1.089450  |
| H                   | 3.762272  | -0.993242 | 1.825250  | H                     | 3.727150  | -0.602148 | 1.727775  |
| C                   | -2.079941 | 3.575501  | 3.531690  | C                     | -4.310282 | -3.539489 | 0.337852  |
| C                   | 1.830087  | -2.579403 | 5.028383  | C                     | -4.431876 | 3.346544  | -1.480638 |
| H                   | 1.966154  | -3.616653 | 5.310499  | H                     | -3.956728 | 4.235342  | -1.877694 |
| H                   | -1.188065 | -0.233666 | -0.962536 | H                     | -1.331886 | 0.588959  | -0.813017 |
| C                   | -2.054930 | 3.735236  | 4.909267  | C                     | -5.446622 | -3.767561 | 1.101931  |
| H                   | -1.788346 | 2.211424  | 1.891713  | H                     | -2.798468 | -2.116727 | -0.222136 |
| C                   | 3.584068  | 1.133963  | 0.375120  | C                     | 3.348036  | 1.704088  | 0.197087  |
| C                   | -1.758608 | 2.347624  | 2.967840  | C                     | -3.696091 | -2.296885 | 0.361053  |
| C                   | 4.310562  | 2.250523  | 0.757523  | C                     | 4.096997  | 2.771511  | 0.670792  |
| C                   | 0.489634  | -0.871392 | 3.968234  | C                     | -4.331633 | 1.371769  | -0.097057 |
| C                   | -1.707479 | 2.665194  | 5.725285  | C                     | -5.968523 | -2.749070 | 1.887174  |
| C                   | 0.688747  | -2.203704 | 4.334132  | C                     | -3.731969 | 2.518914  | -0.616305 |
| C                   | 3.217057  | -1.918723 | 1.686774  | C                     | 3.152407  | -1.520754 | 1.713752  |
| H                   | -1.688728 | 2.786111  | 6.801565  | H                     | -6.853053 | -2.924272 | 2.487365  |
| H                   | 4.686580  | -3.086839 | 2.717596  | H                     | 4.639022  | -2.629673 | 2.786406  |
| P                   | 1.237409  | -0.444403 | 0.240346  | P                     | 1.162471  | -0.093839 | 0.277542  |
| C                   | -1.401614 | 1.271916  | 3.777912  | C                     | -4.217902 | -1.265014 | 1.141718  |
| C                   | 2.244152  | 1.005682  | 0.748494  | C                     | 2.168115  | 1.334317  | 0.842392  |
| C                   | -1.382235 | 1.440620  | 5.163951  | C                     | -5.360251 | -1.501940 | 1.906449  |
| Pt                  | -1.020595 | -0.321925 | 0.633867  | Pt                    | -1.109274 | 0.152736  | 0.712012  |
| C                   | 3.739598  | -3.102857 | 2.191452  | C                     | 3.666884  | -2.664146 | 2.309875  |
| H                   | -0.050413 | -2.955903 | 4.086168  | H                     | -2.707349 | 2.753774  | -0.345910 |
| C                   | 3.704518  | 3.257204  | 1.500221  | C                     | 3.676347  | 3.475490  | 1.790701  |
| H                   | 4.274011  | 4.131343  | 1.791602  | H                     | 4.261858  | 4.309848  | 2.157253  |
| C                   | 1.996161  | -1.923642 | 1.018113  | C                     | 1.900036  | -1.553181 | 1.106027  |
| P                   | -1.007131 | -0.361827 | 3.030481  | P                     | -3.377956 | 0.361447  | 1.106392  |
| H                   | -1.102627 | 0.612467  | 5.806465  | H                     | -5.781653 | -0.715100 | 2.520936  |
| C                   | 1.641101  | 2.027583  | 1.475704  | C                     | 1.748906  | 2.047151  | 1.965889  |
| C                   | 2.368051  | 3.147596  | 1.854608  | C                     | 2.503208  | 3.111013  | 2.437815  |
| C                   | 3.052953  | -4.297171 | 2.030144  | C                     | 2.938821  | -3.845051 | 2.298067  |
| C                   | 1.297602  | -3.126291 | 0.880017  | C                     | 1.166888  | -2.740638 | 1.107623  |
| H                   | 0.592853  | 1.939305  | 1.740358  | H                     | 0.832171  | 1.751640  | 2.466155  |
| H                   | 3.466403  | -5.218269 | 2.422613  | H                     | 3.342400  | -4.735379 | 2.764706  |
| H                   | 1.885279  | 3.935274  | 2.421143  | H                     | 2.171371  | 3.659858  | 3.310715  |
| H                   | 0.337165  | -3.129374 | 0.373602  | H                     | 0.180461  | -2.761391 | 0.654017  |
| C                   | -2.312348 | -1.444389 | 3.758489  | C                     | -3.817486 | 1.183484  | 2.693997  |
| C                   | 1.826722  | -4.306459 | 1.377291  | C                     | 1.687873  | -3.882408 | 1.695197  |
| S                   | -3.418688 | -0.208651 | 0.632525  | S                     | -0.791812 | -0.578553 | 3.055944  |
| H                   | -3.819653 | -2.367798 | 1.668282  | H                     | -1.402902 | 1.604623  | 3.940063  |
| C                   | -4.088250 | -1.339272 | 1.922665  | C                     | -1.761306 | 0.583873  | 4.104020  |
| H                   | 1.280333  | -5.233860 | 1.256155  | H                     | 1.112229  | -4.799837 | 1.691914  |
| H                   | -5.170054 | -1.263735 | 1.799687  | H                     | -1.498038 | 0.326064  | 5.131327  |
| C                   | -3.731774 | -1.058890 | 3.368246  | C                     | -3.270299 | 0.536535  | 3.957908  |
| H                   | -2.104441 | -2.467662 | 3.433823  | H                     | -3.444710 | 2.207684  | 2.597595  |
| H                   | -2.189093 | -1.419117 | 4.844170  | H                     | -4.907058 | 1.260167  | 2.734160  |
| H                   | -4.411534 | -1.638864 | 4.001589  | H                     | -3.714195 | 1.067264  | 4.807423  |
| H                   | -3.920976 | -0.007407 | 3.606070  | H                     | -3.615192 | -0.498824 | 4.033474  |

| <i>cis-11-skew-boat</i> |           |           |           | <i>trans-11-skew-boat</i> |           |           |           |
|-------------------------|-----------|-----------|-----------|---------------------------|-----------|-----------|-----------|
| H                       | -6.353986 | -0.404863 | -4.208598 | H                         | -6.757157 | 0.339611  | -3.656556 |
| H                       | -5.581542 | 1.654461  | -3.060785 | H                         | -5.936229 | 2.133005  | -2.159826 |
| C                       | -5.436083 | -0.414018 | -3.633555 | C                         | -5.784494 | 0.252368  | -3.187898 |
| C                       | -5.004620 | 0.739725  | -2.990178 | C                         | -5.324450 | 1.259481  | -2.349161 |
| H                       | -5.028987 | -2.485589 | -4.018905 | H                         | -5.358746 | -1.658697 | -4.067625 |
| C                       | -4.691618 | -1.579773 | -3.529446 | C                         | -5.000527 | -0.868890 | -3.418588 |
| H                       | -8.247484 | 2.610709  | 1.682731  | H                         | 0.176035  | -0.667349 | 7.610488  |
| C                       | -3.829568 | 0.724808  | -2.256681 | C                         | -4.084716 | 1.143350  | -1.741048 |
| H                       | -3.488695 | 1.632108  | -1.770489 | H                         | -3.731038 | 1.920325  | -1.071139 |
| H                       | -7.233132 | 4.630021  | 0.676748  | H                         | 1.157589  | -2.692949 | 6.584840  |
| C                       | -3.514142 | -1.598450 | -2.791815 | C                         | -3.754082 | -0.984654 | -2.818206 |
| C                       | -7.207818 | 2.602037  | 1.379005  | C                         | 0.099674  | -0.825955 | 6.541702  |
| C                       | -6.636893 | 3.736386  | 0.815710  | C                         | 0.650865  | -1.963676 | 5.964521  |
| C                       | -3.069244 | -0.442406 | -2.155915 | C                         | -3.287695 | 0.022548  | -1.977052 |
| H                       | -2.943230 | -2.516427 | -2.718931 | H                         | -3.147532 | -1.863192 | -3.005103 |
| H                       | -6.896793 | 0.577495  | 2.007173  | H                         | -0.969679 | 1.000766  | 6.205050  |
| H                       | -7.506462 | -2.377731 | -1.340608 | H                         | 2.530253  | 3.909813  | 3.828699  |
| H                       | -1.505356 | 0.549888  | -3.982823 | H                         | -2.019487 | 1.216567  | -3.838522 |
| C                       | -6.446965 | 1.456820  | 1.559347  | C                         | -0.547438 | 0.110473  | 5.750870  |
| H                       | -0.159405 | 2.210856  | -5.187354 | H                         | -0.477599 | 2.419534  | -5.326625 |
| H                       | -6.369328 | -4.568016 | -1.161563 | H                         | 1.295084  | 6.000489  | 4.315085  |
| H                       | -0.265083 | -1.495838 | -3.603852 | H                         | -0.000215 | -1.498854 | -3.192329 |
| C                       | -6.582604 | -2.466820 | -0.781363 | C                         | 1.447541  | 3.906683  | 3.861561  |
| C                       | -5.300289 | 3.728672  | 0.442051  | C                         | 0.553206  | -2.164851 | 4.595341  |
| H                       | -4.848025 | 4.616340  | 0.017140  | H                         | 0.983220  | -3.049969 | 4.142734  |
| H                       | -0.076525 | -0.027789 | 1.037825  | H                         | -0.140423 | 1.101562  | 0.897434  |
| C                       | -5.943096 | -3.693633 | -0.685041 | C                         | 0.754219  | 5.079645  | 4.134384  |
| H                       | -6.546448 | -0.388284 | -0.269557 | H                         | 1.304540  | 1.818678  | 3.407805  |
| C                       | -0.752828 | 1.115879  | -3.446357 | C                         | -0.991684 | 1.368777  | -3.532256 |
| C                       | -6.040246 | -1.341060 | -0.173631 | C                         | 0.757106  | 2.729059  | 3.628011  |
| C                       | 0.005056  | 2.056330  | -4.127883 | C                         | -0.119422 | 2.045485  | -4.375217 |
| C                       | -5.106844 | 1.433382  | 1.167354  | C                         | -0.650505 | -0.086995 | 4.373064  |
| C                       | -4.748284 | -3.794271 | 0.016899  | C                         | -0.631676 | 5.067574  | 4.171793  |
| C                       | -4.538336 | 2.583299  | 0.621401  | C                         | -0.095899 | -1.229591 | 3.800890  |
| C                       | -0.177935 | -2.231135 | -2.812138 | C                         | -0.323370 | -2.211655 | -2.442544 |
| H                       | -4.236157 | -4.746386 | 0.089905  | H                         | -1.178674 | 5.979097  | 4.380003  |
| H                       | 0.819958  | -3.653110 | -4.063748 | H                         | 0.650595  | -3.862894 | -3.398063 |
| P                       | -1.527786 | -0.368984 | -1.157250 | P                         | -1.646081 | -0.048942 | -1.165041 |
| C                       | -4.848434 | -1.435958 | 0.538819  | C                         | -0.637858 | 2.707039  | 3.675322  |
| C                       | -0.556196 | 0.902527  | -2.079613 | C                         | -0.547693 | 0.887826  | -2.302254 |
| C                       | -4.203109 | -2.672908 | 0.621584  | C                         | -1.327640 | 3.887499  | 3.943141  |
| Pt                      | -1.688439 | 0.070577  | 1.090611  | Pt                        | -1.638037 | 0.556504  | 1.077608  |
| C                       | 0.433569  | -3.447482 | -3.072896 | C                         | 0.042513  | -3.545705 | -2.559579 |
| H                       | -3.486297 | 2.574642  | 0.351519  | H                         | -0.180946 | -1.377611 | 2.727991  |
| C                       | 0.965465  | 2.798728  | -3.454541 | C                         | 1.202239  | 2.237556  | -4.003561 |
| H                       | 1.553091  | 3.536853  | -3.986717 | H                         | 1.881234  | 2.764270  | -4.662906 |
| C                       | -0.674989 | -1.952557 | -1.538712 | C                         | -1.102530 | -1.791556 | -1.366036 |
| P                       | -4.047155 | -0.038081 | 1.420676  | P                         | -1.514330 | 1.137392  | 3.317119  |
| H                       | -3.262824 | -2.750393 | 1.159286  | H                         | -2.410108 | 3.895078  | 3.974409  |
| C                       | 0.407143  | 1.657415  | -1.411612 | C                         | 0.782601  | 1.091162  | -1.932079 |
| C                       | 1.164003  | 2.597148  | -2.096424 | C                         | 1.652734  | 1.755360  | -2.780631 |
| C                       | 0.551876  | -4.398280 | -2.066966 | C                         | -0.369811 | -4.468523 | -1.608880 |
| C                       | -0.547439 | -2.908806 | -0.533611 | C                         | -1.512362 | -2.723900 | -0.411022 |
| H                       | 0.555317  | 1.509406  | -0.348708 | H                         | 1.134007  | 0.726833  | -0.973020 |
| H                       | 1.906523  | 3.177790  | -1.562737 | H                         | 2.683966  | 1.903390  | -2.484064 |
| H                       | -0.918719 | -2.682099 | 0.460819  | H                         | -2.122725 | -2.392635 | 0.424474  |
| C                       | -4.376564 | -0.539622 | 3.171776  | C                         | -3.171110 | 1.357890  | 4.082515  |
| C                       | 0.061136  | -4.127966 | -0.797908 | C                         | -1.149971 | -4.056084 | -0.536347 |
| S                       | -1.349530 | 0.630967  | 3.389273  | S                         | -3.938551 | -0.289007 | 1.409003  |
| H                       | -3.187336 | 2.172621  | 3.144243  | H                         | -2.899425 | -1.499114 | 3.221897  |
| C                       | -2.913138 | 1.447903  | 3.913526  | C                         | -3.840775 | -0.952543 | 3.124953  |
| H                       | 0.157503  | -4.863425 | -0.008530 | H                         | -1.474610 | -4.773090 | 0.207917  |
| H                       | -2.672148 | 2.028593  | 4.805276  | H                         | -4.633371 | -1.695045 | 3.230087  |
| H                       | 1.033145  | -5.346763 | -2.272444 | H                         | -0.081708 | -5.508577 | -1.702182 |
| C                       | -4.087218 | 0.531900  | 4.215248  | C                         | -3.972890 | 0.070188  | 4.244908  |
| H                       | -3.931488 | 0.033802  | 5.175671  | H                         | -5.022401 | 0.351458  | 4.363293  |
| H                       | -4.973627 | 1.162943  | 4.339427  | H                         | -3.681512 | -0.418965 | 5.180244  |
| H                       | -5.406116 | -0.893653 | 3.253691  | H                         | -3.061170 | 1.863471  | 5.044160  |
| H                       | -3.730777 | -1.408316 | 3.318674  | H                         | -3.691939 | 2.044758  | 3.412372  |

| <b>cis-11-boat</b> |           |           |           | <b>trans-11-boat</b> |           |           |           |
|--------------------|-----------|-----------|-----------|----------------------|-----------|-----------|-----------|
| H                  | 2.978539  | 0.263050  | -5.104495 | H                    | 2.601324  | -0.338855 | -5.267165 |
| H                  | 1.547774  | 2.025109  | -4.111892 | H                    | 1.101965  | 1.444962  | -4.428443 |
| C                  | 2.610420  | 0.157203  | -4.091343 | C                    | 2.328400  | -0.306934 | -4.219459 |
| C                  | 1.806512  | 1.145538  | -3.535068 | C                    | 1.486237  | 0.693611  | -3.749457 |
| H                  | 3.561022  | -1.739729 | -3.773573 | H                    | 3.472330  | -2.047709 | -3.703997 |
| C                  | 2.935869  | -0.965007 | -3.346366 | C                    | 2.815395  | -1.265261 | -3.344101 |
| H                  | 2.393604  | 0.229117  | 5.658328  | H                    | -6.610872 | 1.002538  | -2.581893 |
| C                  | 1.327847  | 1.006078  | -2.243601 | C                    | 1.127814  | 0.728838  | -2.412104 |
| H                  | 0.689843  | 1.773758  | -1.818501 | H                    | 0.460513  | 1.503350  | -2.050136 |
| H                  | 3.060994  | -2.145244 | 5.919978  | H                    | -6.180633 | 3.429452  | -2.807947 |
| C                  | 2.465501  | -1.103220 | -2.045671 | C                    | 2.468785  | -1.225137 | -1.999476 |
| C                  | 1.820145  | -0.555733 | 5.179571  | C                    | -5.903148 | 1.493439  | -1.924954 |
| C                  | 2.192882  | -1.884749 | 5.326902  | C                    | -5.661169 | 2.852754  | -2.052573 |
| C                  | 1.654660  | -0.120247 | -1.485784 | C                    | 1.619007  | -0.229069 | -1.523679 |
| H                  | 2.734089  | -1.982693 | -1.473143 | H                    | 2.865300  | -1.972695 | -1.323186 |
| H                  | 0.408820  | 0.814146  | 4.343235  | H                    | -5.436155 | -0.309671 | -0.869135 |
| H                  | -3.038410 | 3.939855  | 3.429346  | H                    | -3.789261 | -4.491969 | 0.885259  |
| H                  | 3.815822  | 0.747418  | 0.074489  | H                    | 3.641158  | 1.221038  | -0.722893 |
| C                  | 0.702302  | -0.225292 | 4.428640  | C                    | -5.240379 | 0.752191  | -0.955585 |
| H                  | 5.006523  | 2.578494  | 1.209184  | H                    | 4.990448  | 3.073077  | 0.174041  |
| H                  | -3.624144 | 3.604994  | 5.811158  | H                    | -6.133475 | -4.529855 | 1.677371  |
| H                  | 3.487732  | -0.979119 | 1.793864  | H                    | 3.634452  | -0.585363 | 1.867251  |
| C                  | -2.892017 | 2.973237  | 3.895737  | C                    | -4.296044 | -3.566543 | 1.130092  |
| C                  | 1.444888  | -2.877640 | 4.710760  | C                    | -4.743723 | 3.470937  | -1.212311 |
| H                  | 1.728859  | -3.917847 | 4.815847  | H                    | -4.541809 | 4.530460  | -1.311935 |
| H                  | -1.298700 | 0.342893  | -1.094162 | H                    | -1.295170 | 0.780421  | -0.726017 |
| C                  | -3.220502 | 2.785026  | 5.229670  | C                    | -5.609682 | -3.587250 | 1.574294  |
| H                  | -2.133263 | 2.058357  | 2.101565  | H                    | -2.593078 | -2.335087 | 0.664372  |
| C                  | 3.288311  | 1.373343  | 0.786023  | C                    | 3.331452  | 1.719109  | 0.188703  |
| C                  | -2.375997 | 1.921027  | 3.149670  | C                    | -3.623774 | -2.358929 | 1.000726  |
| C                  | 3.958047  | 2.407806  | 1.420623  | C                    | 4.093214  | 2.762193  | 0.695103  |
| C                  | -0.055280 | -1.216040 | 3.799255  | C                    | -4.327854 | 1.367392  | -0.101840 |
| C                  | -3.029587 | 1.541528  | 5.820850  | C                    | -6.255553 | -2.396980 | 1.885990  |
| C                  | 0.336018  | -2.547570 | 3.944304  | C                    | -4.076140 | 2.733072  | -0.248400 |
| C                  | 2.935569  | -1.876251 | 1.542050  | C                    | 3.112130  | -1.526046 | 1.739532  |
| H                  | -3.282719 | 1.390481  | 6.863209  | H                    | -7.282863 | -2.408929 | 2.229052  |
| H                  | 4.374512  | -3.171375 | 2.457854  | H                    | 4.557909  | -2.636361 | 2.865166  |
| P                  | 1.008635  | -0.217240 | 0.238186  | P                    | 1.159781  | -0.095141 | 0.251259  |
| C                  | -2.185372 | 0.670503  | 3.732768  | C                    | -4.261122 | -1.161847 | 1.319245  |
| C                  | 1.937462  | 1.141055  | 1.054946  | C                    | 2.173269  | 1.312428  | 0.850281  |
| C                  | -2.513131 | 0.491784  | 5.078596  | C                    | -5.586108 | -1.190126 | 1.759566  |
| Pt                 | -1.271354 | -0.125020 | 0.447324  | Pt                   | -1.106604 | 0.144015  | 0.730218  |
| C                  | 3.437409  | -3.115634 | 1.916967  | C                    | 3.633773  | -2.683827 | 2.302137  |
| H                  | -0.218155 | -3.341144 | 3.459378  | H                    | -3.343131 | 3.220816  | 0.385374  |
| C                  | 3.284977  | 3.229256  | 2.317262  | C                    | 3.708185  | 3.402729  | 1.864809  |
| H                  | 3.810390  | 4.039462  | 2.807936  | H                    | 4.304124  | 4.217709  | 2.257215  |
| C                  | 1.726313  | -1.789894 | 0.857547  | C                    | 1.921558  | -1.574777 | 1.019552  |
| P                  | -1.487982 | -0.724294 | 2.749762  | P                    | -3.359824 | 0.425865  | 1.142506  |
| H                  | -2.357624 | -0.471707 | 5.552621  | H                    | -6.101940 | -0.265759 | 1.996281  |
| C                  | 1.267024  | 1.982309  | 1.938329  | C                    | 1.789021  | 1.961701  | 2.023630  |
| C                  | 1.937692  | 3.019254  | 2.571373  | C                    | 2.557046  | 3.000174  | 2.528797  |
| C                  | 2.742047  | -4.275630 | 1.607730  | C                    | 2.975564  | -3.894541 | 2.144700  |
| C                  | 1.020493  | -2.960212 | 0.567652  | C                    | 1.256327  | -2.793893 | 0.876961  |
| H                  | 0.210055  | 1.818998  | 2.121905  | H                    | 0.887768  | 1.639198  | 2.536463  |
| H                  | 3.138366  | -5.240380 | 1.900404  | H                    | 3.385153  | -4.795685 | 2.584578  |
| H                  | 1.402732  | 3.665012  | 3.257888  | H                    | 2.253056  | 3.499084  | 3.440897  |
| H                  | 0.067774  | -2.892222 | 0.050356  | H                    | 0.317684  | -2.832006 | 0.333312  |
| C                  | -2.698867 | -2.098164 | 3.017316  | C                    | -3.689769 | 1.340743  | 2.717884  |
| C                  | 1.529629  | -4.196169 | 0.934495  | C                    | 1.785895  | -3.948646 | 1.429316  |
| S                  | -3.642016 | 0.049828  | 0.237339  | S                    | -0.808676 | -0.861550 | 2.960494  |
| H                  | -5.480919 | -0.973453 | 1.306173  | H                    | -1.840047 | -0.401061 | 5.049537  |
| C                  | -4.452667 | -0.826950 | 1.638673  | C                    | -2.195940 | -0.281606 | 4.025651  |
| H                  | 0.976787  | -5.097435 | 0.698954  | H                    | 1.263941  | -4.890157 | 1.310235  |
| H                  | -4.501264 | -0.178824 | 2.519214  | H                    | -3.054752 | -0.952602 | 3.917956  |
| C                  | -3.823715 | -2.166832 | 1.993015  | C                    | -2.625799 | 1.160838  | 3.790643  |
| H                  | -2.135335 | -3.031199 | 3.003485  | H                    | -3.788419 | 2.394298  | 2.452963  |
| H                  | -3.094640 | -1.986716 | 4.029953  | H                    | -4.668348 | 1.016140  | 3.080183  |
| H                  | -3.457509 | -2.635991 | 1.076303  | H                    | -1.745625 | 1.758277  | 3.537051  |
| H                  | -4.591272 | -2.834191 | 2.395460  | H                    | -3.026230 | 1.576682  | 4.720186  |

| TS[ <i>trans</i> -11-boat→skew-boat] |           |           |           | TS[ <i>trans</i> -11-skew-boat→chair] |           |           |           |
|--------------------------------------|-----------|-----------|-----------|---------------------------------------|-----------|-----------|-----------|
| H                                    | 2.889627  | -4.330047 | -3.647614 | H                                     | 1.968294  | -0.818399 | -5.504080 |
| H                                    | 0.789455  | -3.087389 | -4.071706 | H                                     | 0.231795  | -2.137670 | -4.328842 |
| C                                    | 2.530683  | -3.606428 | -2.925948 | C                                     | 1.811267  | -0.684616 | -4.440779 |
| C                                    | 1.352281  | -2.910504 | -3.163296 | C                                     | 0.836204  | -1.424310 | -3.781949 |
| H                                    | 4.165264  | -3.912648 | -1.568690 | H                                     | 3.340559  | 0.806999  | -4.240774 |
| C                                    | 3.245119  | -3.374055 | -1.760276 | C                                     | 2.579575  | 0.226755  | -3.733258 |
| H                                    | -6.918346 | 3.434168  | 1.097701  | H                                     | -5.341588 | 1.776874  | -2.922720 |
| C                                    | 0.887007  | -1.993507 | -2.234677 | C                                     | 0.628658  | -1.246285 | -2.424614 |
| H                                    | -0.038849 | -1.459675 | -2.416927 | H                                     | -0.140705 | -1.816850 | -1.915667 |
| H                                    | -5.419869 | 5.112138  | 0.067904  | H                                     | -6.078653 | 4.028839  | -2.204552 |
| C                                    | 2.788064  | -2.447199 | -0.832922 | C                                     | 2.382937  | 0.398287  | -2.368403 |
| C                                    | -5.920803 | 3.151661  | 0.784093  | C                                     | -5.139358 | 2.119081  | -1.915110 |
| C                                    | -5.079639 | 4.092773  | 0.203991  | C                                     | -5.553083 | 3.383200  | -1.511683 |
| C                                    | 1.601459  | -1.751865 | -1.061040 | C                                     | 1.403923  | -0.335962 | -1.704002 |
| H                                    | 3.361011  | -2.267234 | 0.068651  | H                                     | 2.997119  | 1.106294  | -1.825073 |
| H                                    | -6.155339 | 1.119986  | 1.411140  | H                                     | -4.130210 | 0.313879  | -1.355073 |
| H                                    | -6.822651 | -1.069806 | -2.907769 | H                                     | -3.919054 | -4.284251 | 1.612450  |
| H                                    | 2.865837  | 0.256297  | -2.111372 | H                                     | 3.876439  | -0.263157 | 1.227294  |
| C                                    | -5.486763 | 1.847311  | 0.964344  | C                                     | -4.460866 | 1.295549  | -1.032669 |
| H                                    | 3.553840  | 2.430571  | -3.033363 | H                                     | 5.423601  | 1.527072  | 1.905568  |
| H                                    | -6.560744 | -3.528010 | -2.804578 | H                                     | -6.386778 | -4.158946 | 1.734744  |
| H                                    | 3.324744  | 1.041332  | 1.217481  | H                                     | 0.506240  | -1.643730 | 2.516960  |
| C                                    | -6.156743 | -1.515876 | -2.179005 | C                                     | -4.416575 | -3.322389 | 1.590021  |
| C                                    | -3.804215 | 3.725735  | -0.200360 | C                                     | -5.287767 | 3.816506  | -0.221988 |
| H                                    | -3.145003 | 4.455631  | -0.654373 | H                                     | -5.605028 | 4.801758  | 0.097332  |
| H                                    | -1.536622 | -0.994030 | -0.924835 | H                                     | -1.618808 | -0.343931 | -0.621205 |
| C                                    | -6.009623 | -2.893174 | -2.121678 | C                                     | -5.800479 | -3.251215 | 1.659412  |
| H                                    | -5.574459 | 0.375868  | -1.361123 | H                                     | -2.582584 | -2.203434 | 1.423481  |
| C                                    | 2.452098  | 1.168694  | -1.698215 | C                                     | 3.571907  | 0.772880  | 1.136549  |
| C                                    | -5.451943 | -0.698815 | -1.304095 | C                                     | -3.666471 | -2.159309 | 1.486327  |
| C                                    | 2.841961  | 2.396007  | -2.217574 | C                                     | 4.444412  | 1.782731  | 1.519266  |
| C                                    | -4.202373 | 1.472441  | 0.566954  | C                                     | -4.199388 | 1.721150  | 0.271545  |
| C                                    | -5.146653 | -3.456432 | -1.189560 | C                                     | -6.435521 | -2.015702 | 1.628987  |
| C                                    | -3.367089 | 2.421308  | -0.020645 | C                                     | -4.614933 | 2.990178  | 0.669125  |
| C                                    | 3.113443  | 0.201466  | 1.868729  | C                                     | 1.261411  | -2.224046 | 1.996506  |
| H                                    | -5.020414 | -4.531268 | -1.144250 | H                                     | -7.516058 | -1.959048 | 1.680716  |
| H                                    | 4.701720  | 0.680773  | 3.224993  | H                                     | 1.366971  | -3.752961 | 3.493081  |
| P                                    | 0.989364  | -0.469528 | 0.105124  | P                                     | 1.104173  | -0.180280 | 0.102908  |
| C                                    | -4.589520 | -1.256868 | -0.364192 | C                                     | -4.296750 | -0.916816 | 1.455847  |
| C                                    | 1.534052  | 1.112734  | -0.651692 | C                                     | 2.308427  | 1.090683  | 0.645422  |
| C                                    | -4.436121 | -2.644467 | -0.321138 | C                                     | -5.688413 | -0.851960 | 1.530838  |
| Pt                                   | -1.299596 | -0.397622 | 0.544125  | Pt                                    | -1.082740 | 0.233593  | 0.781359  |
| C                                    | 3.892088  | -0.003067 | 3.000889  | C                                     | 1.747530  | -3.403533 | 2.540966  |
| H                                    | -2.367187 | 2.127633  | -0.325011 | H                                     | -4.416443 | 3.343370  | 1.673243  |
| C                                    | 2.324898  | 3.572275  | -1.694284 | C                                     | 4.064060  | 3.112467  | 1.409268  |
| H                                    | 2.631126  | 4.527871  | -2.102161 | H                                     | 4.745969  | 3.898416  | 1.710301  |
| C                                    | 2.066784  | -0.668064 | 1.574546  | C                                     | 1.744914  | -1.765687 | 0.770706  |
| P                                    | -3.585667 | -0.240136 | 0.789547  | P                                     | -3.276276 | 0.604997  | 1.390880  |
| H                                    | -3.746007 | -3.090363 | 0.387413  | H                                     | -6.189137 | 0.110118  | 1.503953  |
| C                                    | 1.013699  | 2.299501  | -0.131599 | C                                     | 1.927218  | 2.429422  | 0.547036  |
| C                                    | 1.413508  | 3.522280  | -0.647159 | C                                     | 2.803908  | 3.434889  | 0.921799  |
| C                                    | 3.635993  | -1.077639 | 3.839337  | C                                     | 2.714056  | -4.136628 | 1.865804  |
| C                                    | 1.806081  | -1.740439 | 2.429684  | C                                     | 2.715739  | -2.506896 | 0.097151  |
| H                                    | 0.298132  | 2.253294  | 0.684495  | H                                     | 0.934871  | 2.677827  | 0.183843  |
| H                                    | 4.244519  | -1.235063 | 4.721547  | H                                     | 3.089463  | -5.060061 | 2.289796  |
| H                                    | 1.007324  | 4.437758  | -0.234217 | H                                     | 2.499732  | 4.471336  | 0.842240  |
| H                                    | 0.979956  | -2.409765 | 2.214754  | H                                     | 3.097943  | -2.161711 | -0.856836 |
| C                                    | -4.227392 | -0.800609 | 2.426304  | C                                     | -3.474371 | 1.324674  | 3.067979  |
| H                                    | -5.293453 | -0.564703 | 2.440542  | C                                     | 3.196929  | -3.687174 | 0.644281  |
| C                                    | 2.592451  | -1.948522 | 3.550533  | S                                     | -0.322063 | 1.175876  | 2.925667  |
| S                                    | -0.938991 | 0.502316  | 2.793224  | H                                     | -1.005689 | 0.808725  | 5.155736  |
| H                                    | -3.053002 | 1.712911  | 2.949307  | C                                     | -1.339398 | 0.352207  | 4.222966  |
| H                                    | -4.169201 | -1.889266 | 2.381060  | H                                     | 3.951021  | -4.256147 | 0.114249  |
| C                                    | -2.578989 | 0.908195  | 3.517354  | H                                     | -1.032448 | -0.693701 | 4.276795  |
| H                                    | 2.383875  | -2.785310 | 4.205826  | C                                     | -2.878710 | 0.426480  | 4.142001  |
| H                                    | -2.361151 | 1.320247  | 4.503672  | H                                     | -2.983577 | 2.299582  | 3.063799  |
| C                                    | -3.524899 | -0.271355 | 3.684960  | H                                     | -4.540604 | 1.480898  | 3.248161  |
| H                                    | -2.970118 | -1.085598 | 4.154841  | H                                     | -3.260593 | 0.770429  | 5.105663  |
| H                                    | -4.300398 | 0.017028  | 4.399946  | H                                     | -3.281706 | -0.582806 | 4.017630  |

## M06L/TZVP(PCM):

| <i>cis-5</i> |           |           |           | <i>trans-5</i> |           |           |           |
|--------------|-----------|-----------|-----------|----------------|-----------|-----------|-----------|
| H            | -4.626795 | 3.187848  | -4.466010 | H              | -8.189651 | -2.672683 | 2.510513  |
| H            | -3.185395 | 1.175200  | -4.415855 | H              | -6.685921 | -2.795774 | 0.547349  |
| C            | -4.556141 | 2.593384  | -3.563983 | C              | -7.172152 | -2.309435 | 2.582434  |
| C            | -3.746852 | 1.464036  | -3.536194 | C              | -6.328813 | -2.377400 | 1.480082  |
| H            | -5.904776 | 3.835186  | -2.450028 | H              | -7.360943 | -1.714283 | 4.634887  |
| C            | -5.272784 | 2.956089  | -2.433565 | C              | -6.708196 | -1.771862 | 3.772831  |
| H            | -6.130919 | -3.538980 | -2.398217 | H              | -2.215404 | -5.699372 | 3.670174  |
| C            | -3.653850 | 0.704860  | -2.380990 | C              | -5.030927 | -1.902949 | 1.568430  |
| H            | -5.709276 | -1.180685 | -1.842803 | H              | -3.558277 | -3.648840 | 3.447108  |
| H            | -3.015211 | -0.172388 | -2.362122 | H              | -4.378102 | -1.942023 | 0.703745  |
| C            | -5.482128 | -3.291816 | -1.567214 | C              | -1.728447 | -4.763697 | 3.425134  |
| C            | -5.186746 | 2.193640  | -1.275729 | C              | -5.402582 | -1.307354 | 3.868225  |
| C            | -5.245688 | -1.962070 | -1.251671 | C              | -2.485813 | -3.607410 | 3.297265  |
| H            | -5.072122 | -5.338544 | -1.071253 | H              | 0.234578  | -5.623935 | 3.342933  |
| C            | -4.380607 | 1.057835  | -1.240487 | C              | -4.554324 | -1.365922 | 2.764789  |
| C            | -4.888124 | -4.300980 | -0.822070 | C              | -0.353796 | -4.720318 | 3.243085  |
| H            | -5.751572 | 2.483874  | -0.397626 | H              | -5.047874 | -0.898095 | 4.806242  |
| H            | -0.996122 | 1.522396  | -1.086406 | H              | -0.701262 | 1.067933  | -1.003968 |
| H            | -2.129928 | 2.605386  | -0.689556 | H              | -1.966018 | 2.077044  | -0.984913 |
| C            | -4.409007 | -1.628874 | -0.185254 | C              | -1.869158 | -2.399135 | 2.978081  |
| N            | -1.375682 | 2.046727  | -0.302148 | N              | -1.224524 | 1.700994  | -0.405095 |
| C            | -4.052156 | -3.977538 | 0.237526  | C              | 0.265873  | -3.517512 | 2.929106  |
| P            | -4.103163 | 0.114338  | 0.310163  | P              | -2.800676 | -0.821163 | 2.851572  |
| C            | -3.809119 | -2.649057 | 0.551806  | C              | -0.486508 | -2.361657 | 2.792375  |
| H            | -3.580573 | -4.761424 | 0.816823  | H              | 1.338654  | -3.480563 | 2.785653  |
| C            | -0.324461 | 2.928107  | 0.253701  | C              | -0.331235 | 2.792474  | 0.055657  |
| H            | 1.246742  | 1.469637  | 0.242080  | H              | 1.312990  | 1.523482  | 0.579355  |
| H            | -6.993622 | -0.590467 | 0.210624  | H              | -1.993723 | -1.875557 | 5.525011  |
| C            | -5.558568 | 0.544986  | 1.346408  | C              | -2.654937 | -0.087957 | 4.526876  |
| Pt           | -2.088213 | 0.580598  | 1.237951  | Pt             | -2.033636 | 0.502611  | 1.221237  |
| C            | -6.838955 | 0.078821  | 1.049065  | C              | -2.254705 | -0.829644 | 5.635975  |
| H            | -3.142599 | -2.391463 | 1.366830  | H              | -0.013327 | -1.416150 | 2.542600  |
| H            | -0.809182 | 3.604454  | 0.958521  | H              | -0.962015 | 3.552172  | 0.517832  |
| C            | 0.719864  | 2.104409  | 0.958735  | C              | 0.657976  | 2.257393  | 1.056421  |
| H            | -4.375830 | 1.747473  | 2.663256  | H              | -3.273631 | 1.840947  | 3.817607  |
| C            | -5.377228 | 1.397997  | 2.432807  | C              | -2.982964 | 1.258668  | 4.685627  |
| H            | 1.461262  | 2.759796  | 1.415045  | H              | 1.291524  | 3.069430  | 1.412513  |
| C            | -7.919526 | 0.463766  | 1.827164  | C              | -2.184303 | -0.231042 | 6.886354  |
| H            | -8.910165 | 0.095118  | 1.591944  | H              | -1.865785 | -0.812553 | 7.742471  |
| H            | -2.461277 | -0.435852 | 2.381488  | H              | -3.204457 | -0.036168 | 0.271117  |
| S            | -0.017019 | 1.057312  | 2.285839  | S              | -0.195736 | 1.502160  | 2.499809  |
| C            | -6.460976 | 1.784002  | 3.208954  | C              | -2.920794 | 1.850721  | 5.936804  |
| C            | -7.732021 | 1.317734  | 2.906727  | C              | -2.519598 | 1.106592  | 7.038651  |
| H            | -6.310515 | 2.445975  | 4.052537  | H              | -3.176644 | 2.896639  | 6.050706  |
| H            | -8.577546 | 1.615042  | 3.514432  | H              | -2.462453 | 1.571602  | 8.014912  |
| H            | 0.128535  | 3.531457  | -0.539776 | H              | 0.176288  | 3.244720  | -0.802395 |

| <i>cis-6</i> |           |           |           | <i>trans-6</i> |           |           |           |
|--------------|-----------|-----------|-----------|----------------|-----------|-----------|-----------|
| H            | -4.461872 | 3.526940  | -4.150126 | H              | -8.194213 | -2.757050 | 2.352729  |
| H            | -3.022773 | 1.512106  | -4.168674 | H              | -6.705162 | -2.565763 | 0.384140  |
| C            | -4.440014 | 2.867904  | -3.291580 | C              | -7.188735 | -2.372138 | 2.467931  |
| C            | -3.632342 | 1.737176  | -3.302633 | C              | -6.353813 | -2.263643 | 1.362786  |
| H            | -5.850197 | 4.028279  | -2.165848 | H              | -7.378814 | -2.063111 | 4.582505  |
| C            | -5.218015 | 3.149269  | -2.178456 | C              | -6.732401 | -1.982490 | 3.717573  |
| H            | -5.940476 | -3.407379 | -2.578255 | H              | -2.101177 | -5.703378 | 3.124017  |
| C            | -3.600163 | 0.896580  | -2.201783 | C              | -5.071514 | -1.760710 | 1.507635  |
| H            | -5.636022 | -1.074610 | -1.861840 | H              | -3.527237 | -3.697010 | 3.106012  |
| H            | -2.960722 | 0.019845  | -2.211974 | H              | -4.425591 | -1.662233 | 0.642666  |
| C            | -5.334927 | -3.188832 | -1.707590 | C              | -1.647613 | -4.724321 | 3.032734  |
| C            | -5.191245 | 2.306782  | -1.074499 | C              | -5.442827 | -1.489622 | 3.868157  |
| C            | -5.165218 | -1.873795 | -1.300963 | C              | -2.452138 | -3.592635 | 3.020325  |
| H            | -4.859657 | -5.245476 | -1.323908 | H              | 0.354944  | -5.486183 | 2.941813  |
| C            | -4.384280 | 1.170741  | -1.077574 | C              | -4.603023 | -1.371052 | 2.762561  |
| H            | 2.345641  | 5.041513  | -1.543211 | H              | 2.568889  | 4.954085  | -1.481225 |
| O            | 0.105516  | 3.619994  | -1.708680 | O              | 0.510428  | 3.291329  | -1.703666 |
| C            | -4.728567 | -4.219640 | -1.003041 | C              | -0.269650 | -4.601653 | 2.932123  |
| H            | -5.800333 | 2.535584  | -0.207746 | H              | -5.093857 | -1.196529 | 4.850680  |
| H            | -1.120884 | 1.712918  | -0.841140 | H              | -0.814115 | 1.583664  | -0.737836 |
| H            | -2.250083 | 2.745882  | -0.337565 | H              | -2.084199 | 2.558209  | -0.536516 |
| C            | 1.653859  | 5.644690  | -0.958187 | C              | 1.735514  | 5.592854  | -1.194724 |
| C            | -4.383986 | -1.577724 | -0.182788 | C              | -1.878085 | -2.329215 | 2.898062  |
| C            | 0.219702  | 3.841456  | -0.525210 | C              | 0.367093  | 3.783241  | -0.607884 |
| H            | 2.193895  | 6.382141  | -0.375021 | H              | 2.097164  | 6.496836  | -0.717743 |
| N            | -1.488614 | 2.161441  | -0.002870 | N              | -1.326124 | 2.110858  | -0.031588 |
| C            | -3.947420 | -3.932680 | 0.107606  | C              | 0.307506  | -3.343431 | 2.815281  |
| P            | -4.163036 | 0.140946  | 0.426008  | P              | -2.869294 | -0.784149 | 2.922781  |
| O            | 0.956518  | 4.825252  | -0.004880 | O              | 0.913557  | 4.935063  | -0.215343 |
| C            | -3.771392 | -2.618605 | 0.513714  | C              | -0.491060 | -2.211440 | 2.793098  |
| H            | -3.466057 | -4.733149 | 0.655271  | H              | 1.382946  | -3.244310 | 2.735954  |
| C            | -0.429109 | 3.011086  | 0.566131  | C              | -0.419336 | 3.140546  | 0.517587  |
| H            | 1.120800  | 1.522750  | 0.526436  | H              | 1.172182  | 1.791751  | 1.029221  |
| H            | -7.022093 | -0.622519 | 0.136109  | H              | -1.987685 | -2.052097 | 5.477148  |
| C            | -5.676541 | 0.472787  | 1.412458  | C              | -2.757798 | -0.215474 | 4.663089  |
| Pt           | -2.195789 | 0.610966  | 1.452045  | Pt             | -2.122253 | 0.721042  | 1.450338  |
| C            | -6.927569 | -0.003298 | 1.020606  | C              | -2.307291 | -1.039223 | 5.692117  |
| H            | -3.146984 | -2.387831 | 1.369125  | H              | -0.050269 | -1.223184 | 2.696815  |
| H            | -0.886845 | 3.675306  | 1.301620  | H              | -1.027411 | 3.895023  | 1.018739  |
| C            | 0.608028  | 2.144985  | 1.265049  | C              | 0.524310  | 2.514052  | 1.534254  |
| H            | -4.595044 | 1.619837  | 2.860903  | H              | -3.494186 | 1.735080  | 4.151216  |
| C            | -5.572833 | 1.260571  | 2.556740  | C              | -3.162628 | 1.087117  | 4.955591  |
| H            | 1.356872  | 2.781688  | 1.733990  | H              | 1.163937  | 3.289767  | 1.953636  |
| C            | -8.055796 | 0.307533  | 1.763214  | C              | -2.261827 | -0.564054 | 6.995674  |
| H            | -9.023166 | -0.068374 | 1.454285  | H              | -1.904075 | -1.208155 | 7.789170  |
| H            | -2.577287 | -0.463498 | 2.536352  | H              | -3.214962 | 0.201697  | 0.403703  |
| S            | -0.154102 | 1.086895  | 2.559073  | S              | -0.405765 | 1.707537  | 2.890271  |
| C            | -6.704371 | 1.572215  | 3.297354  | C              | -3.124898 | 1.554950  | 6.259142  |
| C            | -7.945750 | 1.096683  | 2.901150  | C              | -2.672482 | 0.729968  | 7.280742  |
| H            | -6.614209 | 2.183849  | 4.186274  | H              | -3.439999 | 2.567672  | 6.476886  |
| H            | -8.828579 | 1.336076  | 3.480696  | H              | -2.634659 | 1.098570  | 8.298205  |
| H            | 0.947321  | 6.132272  | -1.627342 | H              | 1.149159  | 5.837334  | -2.078502 |

| <i>cis-7</i> |           |           |           | <i>trans-7</i> |           |           |           |
|--------------|-----------|-----------|-----------|----------------|-----------|-----------|-----------|
| H            | -4.413249 | 3.684580  | -4.005728 | H              | -8.189493 | -2.709673 | 2.279048  |
| H            | -2.964048 | 1.677994  | -4.069776 | H              | -6.670245 | -2.446149 | 0.341889  |
| C            | -4.399689 | 2.998218  | -3.168691 | C              | -7.185905 | -2.329893 | 2.423923  |
| C            | -3.586406 | 1.871986  | -3.205326 | C              | -6.334028 | -2.180891 | 1.336411  |
| H            | -5.830056 | 4.115739  | -2.025163 | H              | -7.408609 | -2.097947 | 4.545032  |
| C            | -5.193872 | 3.240133  | -2.057733 | C              | -6.748787 | -1.986762 | 3.693709  |
| H            | -5.892106 | -3.290522 | -2.695558 | H              | -2.055591 | -5.665752 | 2.828145  |
| C            | -3.565000 | 0.996557  | -2.131969 | C              | -5.054346 | -1.684162 | 1.519443  |
| H            | -5.589280 | -0.984055 | -1.899369 | H              | -3.505270 | -3.679208 | 2.937500  |
| H            | -2.920983 | 0.123618  | -2.161307 | H              | -4.395784 | -1.553196 | 0.668350  |
| C            | -5.302597 | -3.103618 | -1.806697 | C              | -1.612121 | -4.677860 | 2.823961  |
| C            | -5.178430 | 2.362110  | -0.981510 | C              | -5.461345 | -1.500911 | 3.882318  |
| C            | -5.133704 | -1.803226 | -1.355039 | C              | -2.430016 | -3.557125 | 2.882997  |
| H            | -4.846769 | -5.174386 | -1.479495 | H              | 0.401067  | -5.409044 | 2.717480  |
| C            | -4.366445 | 1.230072  | -1.010879 | C              | -4.604435 | -1.342642 | 2.795365  |
| H            | 2.023938  | 5.203396  | -1.437986 | H              | 2.299934  | 5.143874  | -1.369005 |
| O            | 0.068973  | 3.767855  | -1.466048 | O              | 0.456752  | 3.562789  | -1.409552 |
| C            | -4.716146 | -4.160064 | -1.123746 | C              | -0.234045 | -4.533209 | 2.763689  |
| H            | -5.800394 | 2.559622  | -0.116202 | H              | -5.128422 | -1.243679 | 4.880238  |
| H            | -1.139693 | 1.828657  | -0.700901 | H              | -0.878564 | 1.847352  | -0.529702 |
| H            | -2.276802 | 2.820535  | -0.138389 | H              | -2.143829 | 2.806582  | -0.244417 |
| H            | 1.303526  | 7.594345  | -1.683950 | H              | 1.535971  | 7.330897  | -2.331760 |
| H            | -0.090083 | 6.516929  | -1.658660 | H              | 0.218505  | 6.161636  | -2.305286 |
| C            | 1.635997  | 5.785865  | -0.602380 | C              | 1.720533  | 5.865506  | -0.793234 |
| C            | -4.373024 | -1.547423 | -0.213094 | C              | -1.869103 | -2.282121 | 2.873453  |
| C            | 0.191087  | 3.935685  | -0.273484 | C              | 0.327950  | 4.013674  | -0.293297 |
| H            | 2.471005  | 6.151620  | -0.008836 | H              | 2.396577  | 6.437902  | -0.161875 |
| N            | -1.510691 | 2.223806  | 0.162576  | N              | -1.376590 | 2.329603  | 0.217647  |
| C            | 0.738136  | 6.899632  | -1.064355 | C              | 0.886966  | 6.749516  | -1.678322 |
| C            | -3.955399 | -3.913160 | 0.010453  | C              | 0.329946  | -3.263494 | 2.759397  |
| P            | -4.159757 | 0.149637  | 0.457915  | P              | -2.876264 | -0.751855 | 2.999074  |
| O            | 0.932274  | 4.885411  | 0.297015  | O              | 0.889241  | 5.136721  | 0.152175  |
| C            | -3.780007 | -2.613776 | 0.461478  | C              | -0.481618 | -2.141795 | 2.809069  |
| H            | -3.489408 | -4.733491 | 0.541800  | H              | 1.405555  | -3.147121 | 2.712155  |
| C            | -0.455724 | 3.048752  | 0.775682  | C              | -0.456305 | 3.324651  | 0.807828  |
| H            | 1.101445  | 1.572001  | 0.663598  | H              | 1.131434  | 1.942713  | 1.236214  |
| H            | -7.021377 | -0.540742 | 0.063069  | H              | -2.160773 | -2.251456 | 5.468752  |
| H            | 0.333960  | 7.454557  | -0.218905 | H              | 0.291395  | 7.445516  | -1.089315 |
| C            | -5.685006 | 0.437762  | 1.440144  | C              | -2.770765 | -0.307771 | 4.775889  |
| Pt           | -2.206305 | 0.585944  | 1.521555  | Pt             | -2.147489 | 0.849623  | 1.621218  |
| C            | -6.934696 | 0.007644  | 0.994005  | C              | -2.415825 | -1.236862 | 5.752027  |
| H            | -3.171423 | -2.414429 | 1.335889  | H              | -0.050791 | -1.144451 | 2.800701  |
| H            | -0.917199 | 3.674218  | 1.542222  | H              | -1.052947 | 4.059352  | 1.350286  |
| C            | 0.583250  | 2.152345  | 1.431924  | C              | 0.491845  | 2.641558  | 1.783071  |
| H            | -4.614673 | 1.458923  | 2.987409  | H              | -3.350324 | 1.721951  | 4.392324  |
| C            | -5.591259 | 1.135147  | 2.642294  | C              | -3.095002 | 0.994471  | 5.155187  |
| H            | 1.327505  | 2.767317  | 1.935734  | H              | 1.139266  | 3.391136  | 2.236608  |
| C            | -8.071279 | 0.273533  | 1.740861  | C              | -2.384495 | -0.865729 | 7.088687  |
| H            | -9.037543 | -0.065976 | 1.389314  | H              | -2.101902 | -1.591587 | 7.840852  |
| H            | -2.583895 | -0.554143 | 2.537461  | H              | -3.242893 | 0.383631  | 0.551081  |
| S            | -0.176797 | 1.023244  | 2.665951  | S              | -0.430804 | 1.770078  | 3.103329  |
| C            | -6.731250 | 1.401143  | 3.388028  | C              | -3.069683 | 1.359894  | 6.491948  |
| C            | -7.970841 | 0.971090  | 2.938209  | C              | -2.713497 | 0.430393  | 7.459904  |
| H            | -6.649030 | 1.941549  | 4.322709  | H              | -3.320212 | 2.373846  | 6.777388  |
| H            | -8.860120 | 1.174815  | 3.521520  | H              | -2.686380 | 0.718110  | 8.503484  |



| <i>cis</i> -8 |           |           |           | <i>trans</i> -8 |           |           |           |
|---------------|-----------|-----------|-----------|-----------------|-----------|-----------|-----------|
| H             | -6.433628 | 0.181558  | -4.147876 | H               | 2.894912  | -2.749208 | -4.973312 |
| H             | -5.011491 | 2.142271  | -3.628065 | H               | 0.788023  | -1.449848 | -4.933185 |
| C             | -5.450262 | 0.040102  | -3.716860 | C               | 2.540144  | -2.318377 | -4.045429 |
| C             | -4.652328 | 1.140507  | -3.428300 | C               | 1.357579  | -1.590260 | -4.023034 |
| H             | -5.603107 | -2.100039 | -3.669066 | H               | 4.183882  | -3.065083 | -2.885682 |
| C             | -4.986364 | -1.237955 | -3.446753 | C               | 3.262392  | -2.496509 | -2.875136 |
| H             | -7.747511 | 1.818046  | -1.104689 | H               | -6.858052 | 3.469958  | 0.590745  |
| C             | -3.401502 | 0.960717  | -2.864082 | C               | 0.897300  | -1.048530 | -2.833964 |
| H             | -2.789641 | 1.824375  | -2.625540 | H               | -0.033461 | -0.493146 | -2.812627 |
| H             | -6.826514 | 4.103131  | -1.326943 | H               | -5.164926 | 5.268149  | 0.467500  |
| C             | -3.723795 | -1.422044 | -2.896079 | C               | 2.810369  | -1.944574 | -1.684168 |
| C             | -6.744209 | 2.035655  | -0.759289 | C               | -5.803681 | 3.223226  | 0.587501  |
| C             | -6.226598 | 3.315918  | -0.887588 | C               | -4.852077 | 4.232736  | 0.518510  |
| C             | -2.920195 | -0.324737 | -2.599119 | C               | 1.621914  | -1.216925 | -1.653980 |
| H             | -3.368247 | -2.426489 | -2.701352 | H               | 3.386255  | -2.083038 | -0.777280 |
| H             | -6.392479 | 0.025723  | -0.118278 | H               | -6.155003 | 1.112131  | 0.699356  |
| H             | -3.961126 | -4.681394 | -0.396900 | H               | -5.665447 | -1.796540 | -3.308136 |
| H             | -1.458104 | 0.161256  | -4.666286 | H               | 2.760643  | 1.063877  | -2.052538 |
| C             | -5.978613 | 1.023041  | -0.197266 | C               | -5.407044 | 1.896329  | 0.649984  |
| H             | 0.097429  | 1.216803  | -6.241046 | H               | 3.463516  | 3.420318  | -2.156470 |
| H             | -6.159160 | -5.042958 | 0.690552  | H               | -7.452984 | -3.041890 | -2.133760 |
| H             | -1.030232 | -2.226351 | -4.146202 | H               | 3.577614  | 0.444244  | 1.141634  |
| C             | -4.449144 | -3.872671 | 0.134147  | C               | -5.700686 | -1.805067 | -2.226032 |
| C             | -4.930400 | 3.581567  | -0.464962 | C               | -3.501974 | 3.913159  | 0.510123  |
| H             | -4.514000 | 4.575041  | -0.575622 | H               | -2.756849 | 4.697042  | 0.452994  |
| H             | 0.297187  | 0.513171  | 0.229993  | H               | -1.549806 | -0.521101 | -1.237768 |
| C             | -5.677817 | -4.074574 | 0.744760  | C               | -6.703668 | -2.504449 | -1.566362 |
| H             | -2.866967 | -2.474905 | -0.249741 | H               | -3.944166 | -0.591784 | -2.014645 |
| C             | -0.507043 | 0.533635  | -4.305149 | C               | 2.417210  | 1.760307  | -1.296986 |
| C             | -3.836309 | -2.630414 | 0.208698  | C               | -4.736824 | -1.124770 | -1.500993 |
| C             | 0.370923  | 1.131806  | -5.196716 | C               | 2.815309  | 3.089669  | -1.354504 |
| C             | -4.682370 | 1.282688  | 0.239834  | C               | -4.051174 | 1.568241  | 0.640295  |
| C             | -6.285978 | -3.035119 | 1.437697  | C               | -6.740891 | -2.516868 | -0.180413 |
| C             | -4.159555 | 2.570287  | 0.085276  | C               | -3.101802 | 2.585978  | 0.567493  |
| C             | -0.738712 | -2.800519 | -3.273630 | C               | 3.275049  | -0.492908 | 1.594036  |
| H             | -7.239260 | -3.192815 | 1.926221  | H               | -7.519445 | -3.062020 | 0.338210  |
| H             | -0.316387 | -4.566229 | -4.408049 | H               | 4.984012  | -0.584445 | 2.882026  |
| P             | -1.287449 | -0.463451 | -1.770882 | P               | 1.016510  | -0.414995 | -0.116550 |
| C             | -4.445009 | -1.575815 | 0.881542  | C               | -4.771997 | -1.126158 | -0.105825 |
| C             | -0.175746 | 0.419982  | -2.953263 | C               | 1.580010  | 1.325634  | -0.272590 |
| C             | -5.673692 | -1.793690 | 1.510250  | C               | -5.781834 | -1.827882 | 0.549946  |
| Pt            | -1.288492 | 0.273510  | 0.399674  | Pt              | -1.260151 | -0.439001 | 0.336283  |
| C             | -0.335944 | -4.117746 | -3.422716 | C               | 4.068541  | -1.073449 | 2.573276  |
| H             | -3.131356 | 2.766132  | 0.375986  | H               | -2.048035 | 2.325627  | 0.549954  |
| C             | 1.591269  | 1.620565  | -4.752743 | C               | 2.388025  | 3.988755  | -0.389073 |
| H             | 2.274296  | 2.090524  | -5.449220 | H               | 2.699643  | 5.024674  | -0.437141 |
| C             | -0.773421 | -2.214742 | -2.007272 | C               | 2.092107  | -1.111265 | 1.194061  |
| P             | -3.573396 | 0.028743  | 0.991905  | P               | -3.498947 | -0.176434 | 0.795901  |
| H             | -6.155370 | -0.993315 | 2.060116  | H               | -5.827647 | -1.841890 | 1.631699  |
| C             | 1.051959  | 0.914238  | -2.517824 | C               | 1.150174  | 2.235622  | 0.695941  |
| C             | 1.929822  | 1.508388  | -3.412033 | C               | 1.557856  | 3.558373  | 0.638936  |
| C             | 0.045046  | -4.859796 | -2.311128 | C               | 3.690688  | -2.275638 | 3.153913  |
| C             | -0.382784 | -2.963054 | -0.899127 | C               | 1.714054  | -2.315808 | 1.787232  |
| H             | 1.313511  | 0.839530  | -1.469464 | H               | 0.496642  | 1.892081  | 1.493084  |
| H             | 2.878841  | 1.890098  | -3.056708 | H               | 4.310493  | -2.726178 | 3.919034  |
| H             | -0.406149 | -2.498852 | 0.082444  | H               | 1.222899  | 4.256871  | 1.395857  |
| C             | -3.653009 | 0.398013  | 2.808619  | H               | 0.782130  | -2.786311 | 1.492780  |
| H             | -4.682579 | 0.625896  | 3.096808  | C               | -3.746935 | -0.537523 | 2.587683  |
| C             | 0.023871  | -4.281585 | -1.050718 | H               | -4.731389 | -0.187696 | 2.912483  |
| S             | -0.992385 | 1.225148  | 2.557082  | C               | 2.513227  | -2.896960 | 2.758959  |
| H             | -3.075460 | 2.470286  | 2.774594  | S               | -0.958538 | -0.386843 | 2.775081  |
| H             | -3.357081 | -0.525854 | 3.310444  | H               | -2.724004 | 1.211511  | 3.307028  |
| C             | -2.710074 | 1.518950  | 3.166852  | H               | -3.706367 | -1.622411 | 2.708233  |
| H             | 0.325033  | -4.854932 | -0.183045 | C               | -2.629677 | 0.124217  | 3.365707  |
| H             | -2.643416 | 1.624683  | 4.250220  | H               | 2.211406  | -3.831179 | 3.215478  |
| H             | 0.361671  | -5.888383 | -2.430719 | H               | -2.696464 | -0.146467 | 4.419601  |

| <i>cis-9</i> |           |           |           | <i>trans-9</i> |           |           |           |
|--------------|-----------|-----------|-----------|----------------|-----------|-----------|-----------|
| H            | 2.635163  | -4.010148 | -5.147564 | H              | 2.715631  | 1.076406  | -5.510779 |
| H            | 2.123152  | -1.632566 | -4.692536 | H              | 0.637960  | 1.788634  | -4.366333 |
| C            | 2.268377  | -3.710157 | -4.173865 | C              | 2.564727  | 0.843191  | -4.464119 |
| H            | -5.742480 | 1.321691  | -3.991185 | H              | -4.893134 | 1.542978  | -4.192096 |
| H            | -4.153905 | 2.021903  | -4.293430 | H              | -3.248048 | 2.174203  | -4.162777 |
| H            | 2.294875  | -5.704060 | -3.376362 | H              | 4.445630  | -0.170179 | -4.258678 |
| H            | -4.299839 | 0.310402  | -3.897323 | H              | -3.538549 | 0.460170  | -3.868431 |
| C            | 1.982204  | -2.376871 | -3.918907 | C              | 1.399151  | 1.242013  | -3.822700 |
| C            | -4.697806 | 1.302668  | -3.675879 | C              | -3.928999 | 1.463575  | -3.686969 |
| H            | -2.952487 | -3.003374 | -4.131901 | H              | -2.593505 | -3.087232 | -3.944364 |
| C            | 2.077510  | -4.661531 | -3.180529 | C              | 3.534994  | 0.141818  | -3.762636 |
| H            | -5.400143 | -3.345257 | -3.989714 | H              | -5.056665 | -3.207469 | -4.138118 |
| C            | -3.494826 | -2.696160 | -3.246377 | C              | -3.220460 | -2.719055 | -3.142050 |
| C            | -4.867577 | -2.884977 | -3.166948 | C              | -4.601953 | -2.785615 | -3.250562 |
| H            | -6.171758 | 3.071145  | -2.132566 | H              | -5.602124 | 3.242783  | -2.373979 |
| H            | -4.594392 | 3.764571  | -2.458852 | H              | -3.968020 | 3.879878  | -2.373309 |
| C            | 1.506211  | -1.992873 | -2.673604 | C              | 1.200701  | 0.936660  | -2.485345 |
| C            | -4.552223 | 1.637844  | -2.203038 | C              | -4.050036 | 1.745647  | -2.200733 |
| C            | -5.115370 | 3.009859  | -1.856076 | C              | -4.618794 | 3.127816  | -1.909174 |
| C            | 1.602460  | -4.280802 | -1.935070 | C              | 3.343562  | -0.162879 | -2.421957 |
| H            | 1.269068  | -0.953974 | -2.471228 | H              | 0.290862  | 1.242275  | -1.977218 |
| H            | -2.540239 | 2.355793  | -2.333095 | H              | -2.019111 | 2.371638  | -1.933471 |
| H            | -5.112430 | 0.887185  | -1.628037 | H              | -4.734164 | 1.000923  | -1.769567 |
| H            | -1.744885 | -1.930400 | -2.254319 | H              | -1.558632 | -2.102697 | -1.916373 |
| C            | -2.816361 | -2.102042 | -2.192684 | C              | -2.637862 | -2.173547 | -2.006814 |
| C            | -5.560796 | -2.472555 | -2.036306 | C              | -5.403345 | -2.308556 | -2.220984 |
| H            | -6.633202 | -2.609171 | -1.976289 | H              | -6.481769 | -2.359501 | -2.302709 |
| H            | -2.630266 | 0.638904  | -2.053330 | H              | -2.233474 | 0.652747  | -1.739224 |
| C            | 1.317044  | -2.939823 | -1.667713 | C              | 2.173897  | 0.231473  | -1.774632 |
| H            | 1.443202  | -5.032130 | -1.170166 | H              | 4.106503  | -0.710443 | -1.880739 |
| C            | -3.090491 | 1.591247  | -1.772775 | C              | -2.696268 | 1.619218  | -1.510883 |
| C            | -4.936997 | 3.317292  | -0.380036 | C              | -4.707088 | 3.376470  | -0.414019 |
| H            | -5.317559 | 4.317081  | -0.150904 | H              | -5.091483 | 4.381808  | -0.217741 |
| C            | -3.499300 | -1.700531 | -1.045588 | C              | -3.434192 | -1.693199 | -0.969488 |
| C            | -4.881852 | -1.881452 | -0.981130 | C              | -4.823673 | -1.765935 | -1.084780 |
| H            | -2.912003 | 3.943237  | -0.521313 | H              | -2.670766 | 3.923831  | -0.161298 |
| H            | -5.555445 | 2.625130  | 0.202171  | H              | -5.444659 | 2.689186  | 0.015354  |
| C            | -2.864531 | 1.850265  | -0.280795 | C              | -2.735105 | 1.825660  | 0.006943  |
| C            | -3.479556 | 3.223743  | 0.085125  | C              | -3.363948 | 3.209558  | 0.303911  |
| P            | 0.701074  | -2.379277 | -0.029630 | P              | 1.869635  | -0.113213 | 0.003449  |
| H            | -5.433185 | -1.558586 | -0.104644 | H              | -5.456646 | -1.400792 | -0.283089 |
| H            | -4.499432 | 0.597707  | 0.465514  | H              | -4.529787 | 0.622470  | 0.400839  |
| Pt           | -0.294647 | -0.319281 | -0.051161 | Pt             | -0.382613 | -0.545065 | 0.355796  |
| S            | -1.007021 | 1.947585  | -0.005630 | S              | -0.967278 | 1.823252  | 0.632494  |
| P            | -2.558069 | -0.880474 | 0.296022  | P              | -2.649025 | -0.931263 | 0.498611  |
| C            | -3.420123 | 0.729407  | 0.591321  | C              | -3.485383 | 0.701540  | 0.719524  |
| H            | -3.754641 | 5.737378  | 1.214624  | H              | -3.767581 | 5.695378  | 1.453611  |
| H            | -2.037030 | 5.353675  | 1.112754  | H              | -2.072110 | 5.254896  | 1.652313  |
| H            | -4.144198 | -3.368342 | 1.002604  | H              | -4.033206 | -3.564695 | 0.813937  |
| C            | -2.958798 | 5.126706  | 1.650530  | C              | -3.082869 | 5.044619  | 2.005110  |
| C            | -3.298588 | 3.644921  | 1.564523  | C              | -3.443673 | 3.578915  | 1.805774  |
| H            | -5.353118 | 3.954483  | 2.220408  | H              | -5.572857 | 3.944016  | 2.091858  |
| H            | -3.240118 | 0.961154  | 1.642502  | H              | -3.486930 | 0.890317  | 1.793800  |
| H            | -2.434318 | 3.088394  | 1.944395  | H              | -2.679197 | 2.981238  | 2.314963  |
| C            | -3.700033 | -2.958403 | 1.900855  | C              | -3.838882 | -3.157469 | 1.798599  |
| C            | -2.918708 | -1.809494 | 1.835341  | C              | -3.225783 | -1.914218 | 1.932134  |
| C            | -4.487009 | 3.338021  | 2.470514  | C              | -4.786117 | 3.287337  | 2.469565  |
| H            | -4.805479 | 2.296382  | 2.421132  | H              | -5.122957 | 2.260790  | 2.322470  |
| H            | -2.832156 | 5.449979  | 2.685190  | H              | -3.138561 | 5.332684  | 3.056343  |
| H            | -4.510036 | -4.493566 | 3.154284  | H              | -4.683509 | -4.844879 | 2.810942  |
| H            | -4.231573 | 3.551560  | 3.509510  | H              | -4.717577 | 3.456716  | 3.545240  |
| C            | -3.903813 | -3.596604 | 3.117775  | C              | -4.204701 | -3.880460 | 2.926067  |
| C            | -2.322352 | -1.325150 | 3.004212  | C              | -2.964266 | -1.416809 | 3.211005  |
| H            | -1.685709 | -0.446120 | 2.955192  | H              | -2.455856 | -0.464833 | 3.326915  |
| C            | -3.326158 | -3.099885 | 4.275328  | C              | -3.959463 | -3.371938 | 4.192528  |
| C            | -2.529003 | -1.962966 | 4.215598  | C              | -3.335920 | -2.138401 | 4.332999  |
| H            | -3.486853 | -3.601255 | 5.221566  | H              | -4.247634 | -3.937047 | 5.069935  |
| H            | -2.064465 | -1.575247 | 5.113696  | H              | -3.132507 | -1.740535 | 5.319235  |
| H            | 1.211196  | 0.246872  | -0.255048 | H              | -0.087314 | -2.117016 | 0.222318  |

|   |           |           |           |   |          |           |           |
|---|-----------|-----------|-----------|---|----------|-----------|-----------|
| C | -0.300239 | -3.811483 | 0.548309  | C | 3.083912 | -1.430647 | 0.407019  |
| C | -1.180842 | -4.442738 | -0.331521 | C | 2.838554 | -2.725040 | -0.053188 |
| C | -0.248418 | -4.239949 | 1.874047  | C | 4.247297 | -1.174986 | 1.129320  |
| C | -1.978180 | -5.491714 | 0.099811  | C | 3.745215 | -3.741511 | 0.195988  |
| H | -1.226572 | -4.130523 | -1.367622 | H | 1.927103 | -2.931802 | -0.603081 |
| C | -1.045416 | -5.291617 | 2.302187  | C | 5.148184 | -2.199801 | 1.389086  |
| H | 0.424856  | -3.759145 | 2.574071  | H | 4.453791 | -0.175680 | 1.492549  |
| C | -1.908858 | -5.921525 | 1.417640  | C | 4.901581 | -3.481174 | 0.921309  |
| H | -2.650682 | -5.975160 | -0.598683 | H | 3.545921 | -4.741155 | -0.169384 |
| H | -0.993633 | -5.615363 | 3.334393  | H | 6.046265 | -1.991485 | 1.957110  |
| H | -2.530020 | -6.741599 | 1.755825  | H | 5.605902 | -4.278201 | 1.124041  |
| C | 2.159120  | -2.440402 | 1.091291  | C | 2.517620 | 1.363068  | 0.873826  |
| C | 3.231285  | -3.305104 | 0.883178  | C | 3.433739 | 2.235513  | 0.290389  |
| C | 2.154015  | -1.620526 | 2.219528  | C | 2.087553 | 1.592843  | 2.180368  |
| C | 4.281631  | -3.346044 | 1.788762  | C | 3.913962 | 3.322100  | 1.007676  |
| H | 3.257313  | -3.942088 | 0.007634  | H | 3.770308 | 2.068757  | -0.726327 |
| C | 3.199497  | -1.671631 | 3.129097  | C | 2.575227 | 2.674262  | 2.896684  |
| H | 1.325328  | -0.935947 | 2.372077  | H | 1.356312 | 0.925764  | 2.624933  |
| C | 4.265907  | -2.533497 | 2.913764  | C | 3.488572 | 3.540479  | 2.310499  |
| H | 5.115369  | -4.014308 | 1.612756  | H | 4.621445 | 3.999710  | 0.546271  |
| H | 3.184474  | -1.031381 | 4.002202  | H | 2.234488 | 2.846798  | 3.909816  |
| H | 5.087271  | -2.567480 | 3.618566  | H | 3.863613 | 4.390230  | 2.867144  |

| <i>cis</i> -10 |           |           |           | <i>trans</i> -10 |           |           |           |
|----------------|-----------|-----------|-----------|------------------|-----------|-----------|-----------|
| H              | 4.617555  | -3.953430 | -4.253722 | H                | 3.351950  | -1.075229 | -5.604951 |
| H              | 4.605957  | -1.693259 | -3.242338 | H                | 1.332701  | -2.140304 | -4.649990 |
| C              | 3.846378  | -3.680089 | -3.544510 | C                | 3.077074  | -0.891634 | -4.573796 |
| H              | 2.860618  | -5.583046 | -3.639297 | H                | 4.733532  | 0.422963  | -4.202661 |
| C              | 3.839645  | -2.411063 | -2.977707 | C                | 1.945200  | -1.489821 | -4.038178 |
| H              | -4.931874 | -2.317781 | -3.767510 | H                | -3.250378 | -0.201111 | -4.376015 |
| C              | 2.861638  | -4.592736 | -3.201190 | C                | 3.852698  | -0.050722 | -3.787626 |
| H              | -6.770994 | -3.459576 | -2.566418 | H                | -5.475247 | -1.281392 | -4.451588 |
| C              | -4.945050 | -2.337862 | -2.685008 | C                | -3.694612 | -0.595333 | -3.470659 |
| C              | -5.977265 | -2.975998 | -2.010784 | C                | -4.942449 | -1.200797 | -3.512335 |
| C              | 2.847526  | -2.056656 | -2.079489 | C                | 1.588600  | -1.249492 | -2.719801 |
| C              | 1.871899  | -4.244030 | -2.290611 | C                | 3.500314  | 0.190631  | -2.468205 |
| H              | 2.835406  | -1.060383 | -1.651733 | H                | 0.698138  | -1.703459 | -2.298987 |
| H              | -3.103483 | -1.241096 | -2.492110 | H                | -2.024892 | -0.040173 | -2.233625 |
| C              | -3.922863 | -1.730065 | -1.972151 | C                | -3.007468 | -0.500983 | -2.269370 |
| C              | -5.991316 | -2.992437 | -0.622668 | C                | -5.505606 | -1.708524 | -2.349080 |
| H              | -6.798882 | -3.482430 | -0.093138 | H                | -6.478715 | -2.182569 | -2.378135 |
| C              | 1.854805  | -2.971506 | -1.725427 | C                | 2.366441  | -0.411655 | -1.920755 |
| H              | 1.112947  | -4.969020 | -2.023424 | H                | 4.104292  | 0.858876  | -1.865283 |
| C              | -5.081315 | 3.075973  | -0.079651 | C                | -4.790914 | 3.300516  | 1.244741  |
| H              | -5.385120 | 4.118967  | 0.029853  | H                | -5.111713 | 4.216712  | 1.744711  |
| C              | -3.924698 | -1.748058 | -0.576200 | C                | -3.567255 | -1.005901 | -1.095337 |
| C              | -4.975386 | -2.375722 | 0.092786  | C                | -4.824800 | -1.609497 | -1.145393 |
| H              | -3.687682 | 3.486787  | -1.687297 | H                | -2.858023 | 4.098064  | 0.677329  |
| C              | -3.227681 | 1.557855  | -0.851308 | C                | -2.778193 | 1.953449  | 0.540549  |
| C              | -3.696699 | 3.000063  | -0.709871 | C                | -3.269728 | 3.234216  | 1.203062  |
| P              | 0.588476  | -2.457466 | -0.492770 | P                | 1.879761  | -0.159682 | -0.167663 |
| H              | -5.001334 | -2.383899 | 1.176005  | H                | -5.271234 | -2.007185 | -0.241185 |
| Pt             | -0.574297 | -0.542485 | -0.966238 | Pt               | -0.400870 | -0.437250 | 0.192639  |
| S              | -1.542402 | 1.525130  | -1.620245 | S                | -0.926951 | 1.923917  | 0.519272  |
| P              | -2.572011 | -0.859361 | 0.286859  | P                | -2.654519 | -0.792074 | 0.480502  |
| C              | -3.261369 | 0.855202  | 0.500849  | C                | -3.375156 | 0.737567  | 1.246044  |
| H              | -2.740261 | -3.604006 | 1.302771  | H                | -2.834412 | -3.635534 | -0.036608 |
| H              | -2.537808 | 1.367559  | 1.148392  | H                | -2.986013 | 0.738197  | 2.272935  |
| C              | -2.554238 | -2.954188 | 2.150787  | C                | -3.141555 | -3.486935 | 0.992777  |
| C              | -2.510907 | -1.570332 | 1.970839  | C                | -3.192413 | -2.195298 | 1.521430  |
| H              | -2.399276 | -4.583509 | 3.527571  | H                | -3.439921 | -5.574876 | 1.350031  |
| C              | -2.364873 | -3.507503 | 3.408004  | C                | -3.480074 | -4.579200 | 1.773488  |
| C              | -2.271731 | -0.755226 | 3.079582  | C                | -3.571446 | -2.022971 | 2.851522  |
| H              | -2.220254 | 0.321170  | 2.966710  | H                | -3.606125 | -1.032804 | 3.289031  |
| C              | -2.129983 | -2.688646 | 4.503521  | C                | -3.865055 | -4.398095 | 3.096080  |
| C              | -2.087564 | -1.311573 | 4.336244  | C                | -3.907410 | -3.120407 | 3.632514  |
| H              | -1.981072 | -3.121790 | 5.484552  | H                | -4.128119 | -5.252515 | 3.706761  |
| H              | -1.906319 | -0.665304 | 5.185977  | H                | -4.203142 | -2.972435 | 4.663502  |
| H              | 0.689994  | -0.104843 | -1.867192 | H                | -0.132956 | -2.011775 | 0.004053  |
| C              | -0.472658 | -3.947975 | -0.334739 | C                | 2.936164  | -1.318454 | 0.786409  |
| C              | -1.531106 | -4.071092 | -1.235210 | C                | 4.268320  | -1.546072 | 0.442777  |
| C              | -0.287764 | -4.929169 | 0.636809  | C                | 2.404620  | -1.940924 | 1.913394  |
| C              | -2.402010 | -5.146185 | -1.157383 | C                | 5.053965  | -2.386547 | 1.216025  |
| H              | -1.677240 | -3.304727 | -1.989026 | H                | 4.693634  | -1.069905 | -0.433142 |
| C              | -1.160475 | -6.006431 | 0.713059  | C                | 3.195220  | -2.776156 | 2.689819  |
| H              | 0.523664  | -4.843848 | 1.349630  | H                | 1.364031  | -1.769061 | 2.167818  |
| C              | -2.219954 | -6.114180 | -0.177452 | C                | 4.519235  | -3.000153 | 2.341614  |
| H              | -3.227428 | -5.220850 | -1.854687 | H                | 6.085902  | -2.563034 | 0.939473  |
| H              | -1.016613 | -6.758761 | 1.478696  | H                | 2.774137  | -3.255018 | 3.564941  |
| H              | -2.903838 | -6.950730 | -0.107212 | H                | 5.135106  | -3.656120 | 2.944136  |
| C              | 1.544120  | -2.418586 | 1.075227  | C                | 2.571991  | 1.487262  | 0.244232  |
| C              | 2.650099  | -3.243331 | 1.284539  | C                | 2.249128  | 2.575317  | -0.569709 |
| C              | 1.124806  | -1.568264 | 2.096309  | C                | 3.324220  | 1.700112  | 1.397287  |
| C              | 3.316910  | -3.221509 | 2.500196  | C                | 2.689880  | 3.847497  | -0.244624 |
| H              | 2.991698  | -3.902363 | 0.494027  | H                | 1.649230  | 2.423787  | -1.459786 |
| C              | 1.789175  | -1.553385 | 3.313680  | C                | 3.757465  | 2.977973  | 1.723622  |
| H              | 0.279436  | -0.910492 | 1.925679  | H                | 3.575960  | 0.867149  | 2.042847  |
| C              | 2.885283  | -2.379735 | 3.516970  | C                | 3.444384  | 4.051690  | 0.903429  |
| H              | 4.175879  | -3.862815 | 2.653369  | H                | 2.437727  | 4.682679  | -0.885927 |
| H              | 1.454223  | -0.888591 | 4.100387  | H                | 4.343382  | 3.131798  | 2.621198  |
| H              | 3.408879  | -2.363469 | 4.464679  | H                | 3.785171  | 5.047307  | 1.158513  |
| C              | -5.113025 | 2.365385  | 1.264120  | C                | -5.376613 | 2.080264  | 1.937178  |
| C              | -4.650998 | 0.920355  | 1.127523  | C                | -4.899942 | 0.796655  | 1.270652  |
| H              | -5.811727 | 2.611162  | -0.751197 | H                | -5.180118 | 3.355624  | 0.221919  |
| H              | -6.116403 | 2.396594  | 1.693542  | H                | -6.467755 | 2.119724  | 1.931648  |
| H              | -4.457807 | 2.889440  | 1.968905  | H                | -5.071606 | 2.075754  | 2.989659  |

|   |           |          |           |   |           |           |           |
|---|-----------|----------|-----------|---|-----------|-----------|-----------|
| H | -5.356641 | 0.374058 | 0.492258  | H | -5.275962 | 0.762556  | 0.242421  |
| H | -4.654744 | 0.416941 | 2.098085  | H | -5.310268 | -0.080734 | 1.777930  |
| H | -2.975406 | 3.540387 | -0.086622 | H | -2.869077 | 3.271720  | 2.222358  |
| H | -3.914915 | 1.033812 | -1.527892 | H | -3.125334 | 1.946485  | -0.501116 |

| <i>cis-11-chair</i> |           |           |           | <i>trans-11-chair</i> |           |           |           |
|---------------------|-----------|-----------|-----------|-----------------------|-----------|-----------|-----------|
| H                   | 2.730412  | 0.321758  | -5.257917 | H                     | 2.744467  | -0.473139 | -5.199019 |
| H                   | 1.241251  | 1.975818  | -4.172218 | H                     | 1.286032  | 1.373347  | -4.428085 |
| C                   | 2.445339  | 0.197119  | -4.220796 | C                     | 2.445866  | -0.415108 | -4.159854 |
| C                   | 1.609044  | 1.125301  | -3.611948 | C                     | 1.626816  | 0.621259  | -3.727532 |
| H                   | 3.559910  | -1.617997 | -3.966314 | H                     | 3.511448  | -2.187231 | -3.589083 |
| C                   | 2.909589  | -0.889987 | -3.497483 | C                     | 2.875298  | -1.375886 | -3.257961 |
| H                   | 3.504108  | -0.407586 | 5.279734  | H                     | -7.403481 | 1.638969  | -1.568213 |
| C                   | 1.236517  | 0.961112  | -2.288598 | C                     | 1.236297  | 0.690221  | -2.401047 |
| H                   | 0.570565  | 1.677422  | -1.819993 | H                     | 0.584433  | 1.490690  | -2.068537 |
| H                   | 3.695917  | -2.876617 | 5.368275  | H                     | -6.329591 | 3.639073  | -2.550022 |
| C                   | 2.545483  | -1.051918 | -2.166259 | C                     | 2.496561  | -1.301481 | -1.923326 |
| C                   | 2.710287  | -1.031161 | 4.886725  | C                     | -6.378095 | 1.882496  | -1.319148 |
| C                   | 2.816744  | -2.413398 | 4.937995  | C                     | -5.775198 | 3.003862  | -1.870564 |
| C                   | 1.702581  | -0.128930 | -1.552816 | C                     | 1.672896  | -0.267811 | -1.484614 |
| H                   | 2.920713  | -1.902399 | -1.609878 | H                     | 2.845970  | -2.052241 | -1.225092 |
| H                   | 1.500302  | 0.641115  | 4.327489  | H                     | -6.150091 | 0.192276  | -0.024157 |
| H                   | -1.998483 | 4.343250  | 3.729162  | H                     | -3.838719 | -4.378782 | -0.131792 |
| H                   | 4.072421  | 0.509620  | -0.200238 | H                     | 3.656999  | 1.214372  | -0.692729 |
| C                   | 1.581009  | -0.438966 | 4.340465  | C                     | -5.669895 | 1.066165  | -0.448365 |
| H                   | 5.506177  | 2.232661  | 0.815483  | H                     | 4.987774  | 3.087375  | 0.190762  |
| H                   | -1.842000 | 4.233307  | 6.195878  | H                     | -5.900061 | -4.740875 | 1.188637  |
| H                   | 3.777176  | -1.172588 | 1.571677  | H                     | 3.796334  | -0.670326 | 1.541605  |
| C                   | -1.745809 | 3.410275  | 4.217145  | C                     | -4.272295 | -3.563501 | 0.433642  |
| C                   | 1.792302  | -3.200477 | 4.430724  | C                     | -4.457574 | 3.306475  | -1.553994 |
| H                   | 1.871847  | -4.280243 | 4.456834  | H                     | -3.980902 | 4.177929  | -1.985303 |
| H                   | -1.202459 | 0.257484  | -0.868586 | H                     | -1.311110 | 0.639364  | -0.820366 |
| C                   | -1.659496 | 3.347773  | 5.599886  | C                     | -5.428156 | -3.766407 | 1.174896  |
| H                   | -1.594902 | 2.314723  | 2.372048  | H                     | -2.748429 | -2.158623 | -0.137913 |
| C                   | 3.666363  | 1.168847  | 0.559273  | C                     | 3.335196  | 1.725032  | 0.207567  |
| C                   | -1.513041 | 2.274513  | 3.453137  | C                     | -3.663358 | -2.318302 | 0.423715  |
| C                   | 4.472535  | 2.143666  | 1.125368  | C                     | 4.085429  | 2.780896  | 0.705001  |
| C                   | 0.542401  | -1.220943 | 3.833781  | C                     | -4.345897 | 1.361429  | -0.130227 |
| C                   | -1.339708 | 2.146684  | 6.221053  | C                     | -5.974635 | -2.720242 | 1.904546  |
| C                   | 0.667940  | -2.610875 | 3.874058  | C                     | -3.744316 | 2.485620  | -0.694255 |
| C                   | 3.172192  | -2.033472 | 1.315902  | C                     | 3.188100  | -1.565782 | 1.596057  |
| H                   | -1.273207 | 2.093613  | 7.300580  | H                     | -6.873138 | -2.875166 | 2.488538  |
| H                   | 4.615348  | -3.431043 | 2.056609  | H                     | 4.711418  | -2.712035 | 2.572752  |
| P                   | 1.232315  | -0.238633 | 0.225952  | P                     | 1.160684  | -0.091547 | 0.270830  |
| C                   | -1.184438 | 1.067458  | 4.066808  | C                     | -4.209876 | -1.257773 | 1.146866  |
| C                   | 2.333392  | 1.039460  | 0.956089  | C                     | 2.170850  | 1.323078  | 0.861168  |
| C                   | -1.103632 | 1.013221  | 5.459798  | C                     | -5.371055 | -1.471145 | 1.889922  |
| Pt                  | -1.003428 | -0.059461 | 0.693988  | Pt                    | -1.108674 | 0.168773  | 0.693822  |
| C                   | 3.646064  | -3.309761 | 1.588772  | C                     | 3.703656  | -2.715958 | 2.176525  |
| H                   | -0.114254 | -3.242764 | 3.470629  | H                     | -2.706887 | 2.704195  | -0.463016 |
| C                   | 3.954117  | 3.010553  | 2.080004  | C                     | 3.681318  | 3.440598  | 1.857066  |
| H                   | 4.585384  | 3.774239  | 2.516766  | H                     | 4.267229  | 4.265687  | 2.242572  |
| C                   | 1.924138  | -1.863571 | 0.724182  | C                     | 1.890498  | -1.559385 | 1.089895  |
| P                   | -0.931229 | -0.447819 | 3.056027  | P                     | -3.375852 | 0.370981  | 1.075925  |
| H                   | -0.845111 | 0.081528  | 5.951389  | H                     | -5.810831 | -0.664609 | 2.464764  |
| C                   | 1.818539  | 1.926991  | 1.895950  | C                     | 1.767310  | 1.992371  | 2.017100  |
| C                   | 2.624556  | 2.905541  | 2.460101  | C                     | 2.523015  | 3.044140  | 2.512320  |
| C                   | 2.881654  | -4.422784 | 1.272973  | C                     | 2.930835  | -3.866128 | 2.250140  |
| C                   | 1.148757  | -2.987810 | 0.430063  | C                     | 1.115272  | -2.715690 | 1.175723  |
| H                   | 0.774895  | 1.850568  | 2.179474  | H                     | 0.860986  | 1.671789  | 2.521225  |
| H                   | 3.256321  | -5.416359 | 1.485448  | H                     | 3.334778  | -4.761853 | 2.705198  |
| H                   | 2.208549  | 3.587705  | 3.191940  | H                     | 2.203909  | 3.558715  | 3.410202  |
| H                   | 0.165845  | -2.853604 | -0.011364 | H                     | 0.094893  | -2.701641 | 0.804527  |
| C                   | -2.300599 | -1.527965 | 3.667285  | C                     | -3.821974 | 1.208796  | 2.656834  |
| C                   | 1.627817  | -4.259829 | 0.697771  | C                     | 1.635622  | -3.864890 | 1.749408  |
| S                   | -3.386862 | 0.222859  | 0.791659  | S                     | -0.828066 | -0.591944 | 3.047287  |
| H                   | -3.942108 | -2.020792 | 1.532052  | H                     | -1.412193 | 1.603301  | 3.914809  |
| C                   | -4.115023 | -1.020974 | 1.937485  | C                     | -1.784510 | 0.588880  | 4.085430  |
| H                   | 1.021211  | -5.124639 | 0.459500  | H                     | 1.026071  | -4.757354 | 1.814614  |
| H                   | -5.188845 | -0.840819 | 1.870654  | H                     | -1.531161 | 0.334808  | 5.115508  |
| C                   | -3.692404 | -0.976340 | 3.392650  | C                     | -3.293630 | 0.558823  | 3.927630  |
| H                   | -2.187130 | -2.505201 | 3.190928  | H                     | -3.437735 | 2.228450  | 2.560525  |
| H                   | -2.146408 | -1.674162 | 4.739137  | H                     | -4.910773 | 1.298295  | 2.687470  |
| H                   | -4.402193 | -1.577870 | 3.969875  | H                     | -3.740284 | 1.093406  | 4.772943  |
| H                   | -3.778436 | 0.044116  | 3.778514  | H                     | -3.650420 | -0.472886 | 3.998964  |

| <b>cis-11-skew-boat</b> |           |           |           | <b>trans-11-skew-boat</b> |           |           |           |
|-------------------------|-----------|-----------|-----------|---------------------------|-----------|-----------|-----------|
| H                       | -6.353986 | -0.404863 | -4.208598 | H                         | -6.725474 | 0.358184  | -3.762599 |
| H                       | -5.581542 | 1.654461  | -3.060785 | H                         | -6.037909 | 2.041576  | -2.084455 |
| C                       | -5.436083 | -0.414018 | -3.633555 | C                         | -5.766176 | 0.270379  | -3.268018 |
| C                       | -5.004620 | 0.739725  | -2.990178 | C                         | -5.380546 | 1.216281  | -2.327511 |
| H                       | -5.028987 | -2.485589 | -4.018905 | H                         | -5.227125 | -1.535438 | -4.295504 |
| C                       | -4.691618 | -1.579773 | -3.529446 | C                         | -4.925882 | -0.792906 | -3.567155 |
| H                       | -8.247484 | 2.610709  | 1.682731  | H                         | 0.268605  | -0.705661 | 7.549616  |
| C                       | -3.829568 | 0.724808  | -2.256681 | C                         | -4.156332 | 1.099315  | -1.688348 |
| H                       | -3.488695 | 1.632108  | -1.770489 | H                         | -3.858415 | 1.822932  | -0.936414 |
| H                       | -7.233132 | 4.630021  | 0.676748  | H                         | 1.196809  | -2.736180 | 6.486423  |
| C                       | -3.514142 | -1.598450 | -2.791815 | C                         | -3.696791 | -0.909161 | -2.933863 |
| C                       | -7.207818 | 2.602037  | 1.379005  | C                         | 0.168105  | -0.853004 | 6.481626  |
| C                       | -6.636893 | 3.736386  | 0.815710  | C                         | 0.689332  | -1.993757 | 5.883254  |
| C                       | -3.069244 | -0.442406 | -2.155915 | C                         | -3.303458 | 0.038901  | -1.991904 |
| H                       | -2.943230 | -2.516427 | -2.718931 | H                         | -3.043743 | -1.740703 | -3.172439 |
| H                       | -6.896793 | 0.577495  | 2.007173  | H                         | -0.877925 | 0.992101  | 6.183989  |
| H                       | -7.506462 | -2.377731 | -1.340608 | H                         | 2.498267  | 3.946727  | 4.103670  |
| H                       | -1.505356 | 0.549888  | -3.982823 | H                         | -2.038792 | 1.268544  | -3.827499 |
| C                       | -6.446965 | 1.456820  | 1.559347  | C                         | -0.480356 | 0.099761  | 5.712393  |
| H                       | -0.159405 | 2.210856  | -5.187354 | H                         | -0.473288 | 2.427877  | -5.328089 |
| H                       | -6.369328 | -4.568016 | -1.161563 | H                         | 1.225626  | 6.051684  | 4.381296  |
| H                       | -0.265083 | -1.495838 | -3.603852 | H                         | -0.072437 | -1.534480 | -3.175072 |
| C                       | -6.582604 | -2.466820 | -0.781363 | C                         | 1.417643  | 3.941626  | 4.034781  |
| C                       | -5.300289 | 3.728672  | 0.442051  | C                         | 0.560814  | -2.180683 | 4.514891  |
| H                       | -4.848025 | 4.616340  | 0.017140  | H                         | 0.967277  | -3.068028 | 4.046019  |
| H                       | -0.076525 | -0.027789 | 1.037825  | H                         | -0.160070 | 1.163087  | 0.873764  |
| C                       | -5.943096 | -3.693633 | -0.685041 | C                         | 0.703356  | 5.122657  | 4.190607  |
| H                       | -6.546448 | -0.388284 | -0.269557 | H                         | 1.313275  | 1.833521  | 3.667371  |
| C                       | -0.752828 | 1.115879  | -3.446357 | C                         | -1.001715 | 1.380228  | -3.535979 |
| C                       | -6.040246 | -1.341060 | -0.173631 | C                         | 0.750492  | 2.752396  | 3.790677  |
| C                       | 0.005056  | 2.056330  | -4.127883 | C                         | -0.116642 | 2.032289  | -4.385268 |
| C                       | -5.106844 | 1.433382  | 1.167354  | C                         | -0.614548 | -0.082388 | 4.335046  |
| C                       | -4.748284 | -3.794271 | 0.016899  | C                         | -0.680457 | 5.108418  | 4.099848  |
| C                       | -4.538336 | 2.583299  | 0.621401  | C                         | -0.089315 | -1.228281 | 3.742224  |
| C                       | -0.177935 | -2.231135 | -2.812138 | C                         | -0.384044 | -2.226807 | -2.401545 |
| H                       | -4.236157 | -4.746386 | 0.089905  | H                         | -1.242893 | 6.026070  | 4.218379  |
| H                       | 0.819958  | -3.653110 | -4.063748 | H                         | 0.562789  | -3.907745 | -3.331844 |
| P                       | -1.527786 | -0.368984 | -1.157250 | P                         | -1.671629 | -0.023014 | -1.161876 |
| C                       | -4.848434 | -1.435958 | 0.538819  | C                         | -0.642007 | 2.728812  | 3.707034  |
| C                       | -0.556196 | 0.902527  | -2.079613 | C                         | -0.558879 | 0.873132  | -2.316629 |
| C                       | -4.203109 | -2.672908 | 0.621584  | C                         | -1.352405 | 3.918294  | 3.857390  |
| Pt                      | -1.688439 | 0.070577  | 1.090611  | Pt                        | -1.653885 | 0.617376  | 1.067791  |
| C                       | 0.433569  | -3.447482 | -3.072896 | C                         | -0.025883 | -3.564775 | -2.490135 |
| H                       | -3.486297 | 2.574642  | 0.351519  | H                         | -0.198670 | -1.365519 | 2.670396  |
| C                       | 0.965465  | 2.798728  | -3.454541 | C                         | 1.215868  | 2.172611  | -4.030629 |
| H                       | 1.553091  | 3.536853  | -3.986717 | H                         | 1.904524  | 2.679195  | -4.695110 |
| C                       | -0.674989 | -1.952557 | -1.538712 | C                         | -1.139498 | -1.773495 | -1.321300 |
| P                       | -4.047155 | -0.038081 | 1.420676  | P                         | -1.495831 | 1.157427  | 3.313567  |
| H                       | -3.262824 | -2.750393 | 1.159286  | H                         | -2.433141 | 3.923773  | 3.786053  |
| C                       | 0.407143  | 1.657415  | -1.411612 | C                         | 0.782362  | 1.027279  | -1.962231 |
| C                       | 1.164003  | 2.597148  | -2.096424 | C                         | 1.664895  | 1.665364  | -2.817166 |
| C                       | 0.551876  | -4.398280 | -2.066966 | C                         | -0.420838 | -4.458753 | -1.505326 |
| C                       | -0.547439 | -2.908806 | -0.533611 | C                         | -1.532642 | -2.677155 | -0.332275 |
| H                       | 0.555317  | 1.509406  | -0.348708 | H                         | 1.130190  | 0.646371  | -1.008351 |
| H                       | 1.906523  | 3.177790  | -1.562737 | H                         | 2.704180  | 1.774300  | -2.533370 |
| H                       | -0.918719 | -2.682099 | 0.460819  | H                         | -2.122935 | -2.319569 | 0.506474  |
| C                       | -4.376564 | -0.539622 | 3.171776  | C                         | -3.147278 | 1.336746  | 4.109079  |
| C                       | 0.061136  | -4.127966 | -0.797908 | C                         | -1.176356 | -4.013401 | -0.428470 |
| S                       | -1.349530 | 0.630967  | 3.389273  | S                         | -3.961333 | -0.228695 | 1.429975  |
| H                       | -3.187336 | 2.172621  | 3.144243  | H                         | -2.856838 | -1.496150 | 3.159051  |
| C                       | -2.913138 | 1.447903  | 3.913526  | C                         | -3.806358 | -0.957296 | 3.115025  |
| H                       | 0.157503  | -4.863425 | -0.008530 | H                         | -1.485858 | -4.708343 | 0.342339  |
| H                       | -2.672148 | 2.028593  | 4.805276  | H                         | -4.589006 | -1.709557 | 3.218737  |
| H                       | 1.033145  | -5.346763 | -2.272444 | H                         | -0.138137 | -5.501721 | -1.575518 |
| C                       | -4.087218 | 0.531900  | 4.215248  | C                         | -3.908654 | 0.025827  | 4.274705  |
| H                       | -3.931488 | 0.033802  | 5.175671  | H                         | -4.957275 | 0.276715  | 4.452212  |
| H                       | -4.973627 | 1.162943  | 4.339427  | H                         | -3.559595 | -0.481870 | 5.179985  |
| H                       | -5.406116 | -0.893653 | 3.253691  | H                         | -3.037175 | 1.843307  | 5.070211  |
| H                       | -3.730777 | -1.408316 | 3.318674  | H                         | -3.701043 | 2.004548  | 3.446326  |

| <b>cis-11-boat</b> |           |           |           | <b>trans-11-boat</b> |           |           |           |
|--------------------|-----------|-----------|-----------|----------------------|-----------|-----------|-----------|
| H                  | 3.060075  | 0.392516  | -5.031463 | H                    | 2.803372  | -0.270510 | -5.253818 |
| H                  | 1.404095  | 1.983855  | -4.104336 | H                    | 1.104525  | 1.365832  | -4.502492 |
| C                  | 2.667240  | 0.247190  | -4.032989 | C                    | 2.487885  | -0.252265 | -4.218156 |
| C                  | 1.737496  | 1.140118  | -3.513161 | C                    | 1.534079  | 0.665633  | -3.797029 |
| H                  | 3.810167  | -1.531251 | -3.669838 | H                    | 3.775721  | -1.865484 | -3.632134 |
| C                  | 3.087189  | -0.830926 | -3.270390 | C                    | 3.032101  | -1.147422 | -3.309705 |
| H                  | 2.421566  | 0.037659  | 5.671875  | H                    | -6.768273 | 0.947954  | -2.481931 |
| C                  | 1.228450  | 0.948830  | -2.240294 | C                    | 1.122527  | 0.682918  | -2.474382 |
| H                  | 0.491193  | 1.637654  | -1.842571 | H                    | 0.367170  | 1.389071  | -2.148824 |
| H                  | 3.051921  | -2.356451 | 5.786850  | H                    | -6.323732 | 3.360885  | -2.800279 |
| C                  | 2.585776  | -1.019453 | -1.987847 | C                    | 2.630007  | -1.125197 | -1.980985 |
| C                  | 1.827262  | -0.708630 | 5.158861  | C                    | -6.024631 | 1.448763  | -1.874620 |
| C                  | 2.179311  | -2.048853 | 5.224268  | C                    | -5.774939 | 2.800552  | -2.053901 |
| C                  | 1.649355  | -0.132315 | -1.464698 | C                    | 1.668868  | -0.210767 | -1.553361 |
| H                  | 2.928049  | -1.861832 | -1.398978 | H                    | 3.068308  | -1.821722 | -1.276535 |
| H                  | 0.426383  | 0.729749  | 4.425478  | H                    | -5.527992 | -0.327127 | -0.786202 |
| H                  | -3.084683 | 3.961202  | 3.232356  | H                    | -3.792796 | -4.478252 | 0.982110  |
| H                  | 3.752343  | 0.759356  | 0.118393  | H                    | 3.593616  | 1.326444  | -0.758735 |
| C                  | 0.702935  | -0.317216 | 4.447195  | C                    | -5.324352 | 0.728576  | -0.915955 |
| H                  | 4.893844  | 2.599739  | 1.287187  | H                    | 4.932661  | 3.149134  | 0.213002  |
| H                  | -3.461866 | 3.795224  | 5.672189  | H                    | -6.113204 | -4.493182 | 1.838031  |
| H                  | 3.443798  | -0.958751 | 1.860489  | H                    | 3.594498  | -0.636266 | 1.856993  |
| C                  | -2.878008 | 3.034663  | 3.753188  | C                    | -4.291169 | -3.546248 | 1.217530  |
| C                  | 1.408425  | -2.993358 | 4.561603  | C                    | -4.812365 | 3.432547  | -1.276880 |
| H                  | 1.680418  | -4.040898 | 4.597597  | H                    | -4.605586 | 4.486143  | -1.416980 |
| H                  | -1.326064 | 0.117368  | -1.137676 | H                    | -1.293892 | 0.829080  | -0.772800 |
| C                  | -3.090689 | 2.940830  | 5.120032  | C                    | -5.592099 | -3.554362 | 1.697621  |
| H                  | -2.250218 | 2.000757  | 1.972524  | H                    | -2.598902 | -2.329873 | 0.679477  |
| C                  | 3.205750  | 1.363960  | 0.833990  | C                    | 3.301873  | 1.760620  | 0.190325  |
| C                  | -2.400865 | 1.939106  | 3.045266  | C                    | -3.621003 | -2.343632 | 1.040317  |
| C                  | 3.847701  | 2.404386  | 1.486638  | C                    | 4.057597  | 2.787485  | 0.738426  |
| C                  | -0.081273 | -1.258777 | 3.778766  | C                    | -4.365162 | 1.357172  | -0.125805 |
| C                  | -2.828079 | 1.747172  | 5.781844  | C                    | -6.228393 | -2.356094 | 1.996987  |
| C                  | 0.295199  | -2.601715 | 3.834400  | C                    | -4.107603 | 2.714968  | -0.324588 |
| C                  | 2.945032  | -1.874392 | 1.568305  | C                    | 3.061879  | -1.568773 | 1.712918  |
| H                  | -2.992940 | 1.669360  | 6.849238  | H                    | -7.245407 | -2.357713 | 2.368481  |
| H                  | 4.421457  | -3.123216 | 2.487704  | H                    | 4.468596  | -2.711612 | 2.855145  |
| P                  | 0.976993  | -0.278591 | 0.245152  | P                    | 1.157734  | -0.093614 | 0.206949  |
| C                  | -2.134095 | 0.739034  | 3.700192  | C                    | -4.249018 | -1.137952 | 1.344197  |
| C                  | 1.858149  | 1.097756  | 1.087355  | C                    | 2.172120  | 1.290431  | 0.857443  |
| C                  | -2.352922 | 0.653619  | 5.077037  | C                    | -5.561521 | -1.154408 | 1.820721  |
| Pt                 | -1.305230 | -0.251384 | 0.428454  | Pt                   | -1.107382 | 0.165451  | 0.669345  |
| C                  | 3.497945  | -3.097679 | 1.922396  | C                    | 3.554863  | -2.739072 | 2.274705  |
| H                  | -0.273676 | -3.354246 | 3.302092  | H                    | -3.340333 | 3.212410  | 0.259109  |
| C                  | 3.149339  | 3.200073  | 2.386957  | C                    | 3.694925  | 3.346915  | 1.955227  |
| H                  | 3.652537  | 4.015051  | 2.892015  | H                    | 4.285769  | 4.148638  | 2.380444  |
| C                  | 1.752989  | -1.827456 | 0.851408  | C                    | 1.883556  | -1.592419 | 0.972000  |
| P                  | -1.518300 | -0.722193 | 2.762458  | P                    | -3.353813 | 0.444658  | 1.104446  |
| H                  | -2.140345 | -0.270715 | 5.603742  | H                    | -6.072304 | -0.224562 | 2.046052  |
| C                  | 1.162763  | 1.914801  | 1.973385  | C                    | 1.808360  | 1.859887  | 2.078625  |
| C                  | 1.804723  | 2.958315  | 2.624800  | C                    | 2.571250  | 2.880409  | 2.624917  |
| C                  | 2.868489  | -4.280329 | 1.564058  | C                    | 2.880510  | -3.937557 | 2.094456  |
| C                  | 1.112612  | -3.021667 | 0.512719  | C                    | 1.203719  | -2.799942 | 0.803963  |
| H                  | 0.107251  | 1.732985  | 2.143887  | H                    | 0.927978  | 1.486233  | 2.593604  |
| H                  | 3.303925  | -5.232347 | 1.841112  | H                    | 3.266875  | -4.848315 | 2.534641  |
| H                  | 1.249007  | 3.583970  | 3.313098  | H                    | 2.284730  | 3.315992  | 3.574134  |
| H                  | 0.170563  | -2.984289 | -0.026214 | H                    | 0.271893  | -2.816099 | 0.247647  |
| C                  | -2.792331 | -2.017663 | 3.145546  | C                    | -3.647569 | 1.390486  | 2.670506  |
| C                  | 1.670679  | -4.240846 | 0.861876  | C                    | 1.704434  | -3.967296 | 1.355735  |
| S                  | -3.673621 | -0.075602 | 0.193948  | S                    | -0.822292 | -0.877345 | 2.895898  |
| H                  | -5.536187 | -0.946639 | 1.353642  | H                    | -1.814147 | -0.375101 | 4.995985  |
| C                  | -4.500306 | -0.810606 | 1.664326  | C                    | -2.179106 | -0.255302 | 3.976045  |
| H                  | 1.168645  | -5.160624 | 0.588766  | H                    | 1.170719  | -4.899443 | 1.219608  |
| H                  | -4.513152 | -0.092531 | 2.489971  | H                    | -3.056236 | -0.904131 | 3.881818  |
| C                  | -3.909527 | -2.138940 | 2.119404  | C                    | -2.572840 | 1.196664  | 3.731093  |
| H                  | -2.272202 | -2.969894 | 3.245032  | H                    | -3.726504 | 2.442211  | 2.392274  |
| H                  | -3.195378 | -1.776751 | 4.132420  | H                    | -4.627658 | 1.092392  | 3.050825  |
| H                  | -3.548212 | -2.682064 | 1.242974  | H                    | -1.679971 | 1.764474  | 3.455380  |
| H                  | -4.696422 | -2.756344 | 2.561822  | H                    | -2.945665 | 1.635690  | 4.661090  |



| TS[ <i>trans</i> -11-boat→skew-boat] |           |           |           | TS[ <i>trans</i> -11-skew-boat→chair] |           |           |           |
|--------------------------------------|-----------|-----------|-----------|---------------------------------------|-----------|-----------|-----------|
| H                                    | 3.188284  | -4.459548 | -3.395142 | H                                     | 1.983453  | -0.806251 | -5.500968 |
| H                                    | 0.852349  | -3.696768 | -3.686060 | H                                     | 0.216354  | -2.098020 | -4.343125 |
| C                                    | 2.769088  | -3.723939 | -2.720115 | C                                     | 1.824990  | -0.677042 | -4.437672 |
| C                                    | 1.458863  | -3.296327 | -2.883351 | C                                     | 0.832576  | -1.401668 | -3.788227 |
| H                                    | 4.562126  | -3.539675 | -1.553761 | H                                     | 3.380927  | 0.783804  | -4.221511 |
| C                                    | 3.539308  | -3.209979 | -1.686441 | C                                     | 2.607776  | 0.214288  | -3.721001 |
| H                                    | -6.417752 | 3.744634  | 1.594693  | H                                     | -5.177071 | 1.863106  | -2.977108 |
| C                                    | 0.917781  | -2.360777 | -2.014489 | C                                     | 0.622026  | -1.228145 | -2.430964 |
| H                                    | -0.109037 | -2.034857 | -2.132198 | H                                     | -0.163890 | -1.781995 | -1.929288 |
| H                                    | -5.049624 | 5.222871  | 0.159026  | H                                     | -6.147842 | 4.000826  | -2.191014 |
| C                                    | 3.003058  | -2.269577 | -0.819388 | C                                     | 2.408481  | 0.379910  | -2.355977 |
| C                                    | -5.553957 | 3.349718  | 1.074876  | C                                     | -5.059672 | 2.165962  | -1.944194 |
| C                                    | -4.785728 | 4.178551  | 0.269323  | C                                     | -5.604300 | 3.366038  | -1.502596 |
| C                                    | 1.685148  | -1.837208 | -0.975812 | C                                     | 1.412431  | -0.339258 | -1.700371 |
| H                                    | 3.613150  | -1.869367 | -0.018185 | H                                     | 3.032091  | 1.072672  | -1.804257 |
| H                                    | -5.821767 | 1.382555  | 1.862755  | H                                     | -3.920142 | 0.428853  | -1.414607 |
| H                                    | -7.608015 | -1.023589 | -2.126931 | H                                     | -3.937225 | -4.256601 | 1.780156  |
| H                                    | 2.848274  | 0.198361  | -2.112483 | H                                     | 3.938350  | -0.279321 | 1.046330  |
| C                                    | -5.215291 | 2.012482  | 1.222890  | C                                     | -4.357637 | 1.358324  | -1.066268 |
| H                                    | 3.434591  | 2.371067  | -3.109693 | H                                     | 5.515330  | 1.499923  | 1.692452  |
| H                                    | -6.844414 | -3.244432 | -2.902217 | H                                     | -6.407241 | -4.127835 | 1.746821  |
| H                                    | 3.117997  | 1.201686  | 1.307093  | H                                     | 0.626366  | -1.541031 | 2.592782  |
| C                                    | -6.657534 | -1.419051 | -1.790964 | C                                     | -4.430318 | -3.297524 | 1.682710  |
| C                                    | -3.675682 | 3.667479  | -0.388693 | C                                     | -5.446903 | 3.749841  | -0.180106 |
| H                                    | -3.069140 | 4.310598  | -1.014237 | H                                     | -5.867213 | 4.684766  | 0.168752  |
| H                                    | -1.517061 | -1.030320 | -0.984769 | H                                     | -1.606441 | -0.308983 | -0.634876 |
| C                                    | -6.228571 | -2.664612 | -2.226178 | C                                     | -5.815836 | -3.224447 | 1.664820  |
| H                                    | -6.213535 | 0.299822  | -0.591821 | H                                     | -2.588006 | -2.185991 | 1.572129  |
| C                                    | 2.393566  | 1.104695  | -1.730770 | C                                     | 3.619781  | 0.756443  | 1.026771  |
| C                                    | -5.870085 | -0.672528 | -0.925277 | C                                     | -3.673439 | -2.140245 | 1.569180  |
| C                                    | 2.724754  | 2.330560  | -2.292897 | C                                     | 4.508257  | 1.758774  | 1.390100  |
| C                                    | -4.101055 | 1.490240  | 0.565877  | C                                     | -4.203845 | 1.732766  | 0.270113  |
| C                                    | -5.006032 | -3.163824 | -1.796948 | C                                     | -6.445246 | -1.992717 | 1.537561  |
| C                                    | -3.333025 | 2.332455  | -0.238968 | C                                     | -4.751993 | 2.936711  | 0.706201  |
| C                                    | 2.977125  | 0.339142  | 1.947245  | C                                     | 1.329845  | -2.164498 | 2.050218  |
| H                                    | -4.664786 | -4.133629 | -2.137014 | H                                     | -7.526433 | -1.934681 | 1.521011  |
| H                                    | 4.454904  | 0.974850  | 3.362216  | H                                     | 1.487991  | -3.640070 | 3.593686  |
| P                                    | 0.984871  | -0.536056 | 0.115766  | P                                     | 1.107139  | -0.183128 | 0.104813  |
| C                                    | -4.640303 | -1.165809 | -0.495253 | C                                     | -4.298015 | -0.900735 | 1.442672  |
| C                                    | 1.476225  | 1.041029  | -0.684987 | C                                     | 2.320684  | 1.079970  | 0.643147  |
| C                                    | -4.212929 | -2.415989 | -0.940982 | C                                     | -5.691064 | -0.834321 | 1.430110  |
| Pt                                   | -1.309158 | -0.495585 | 0.509988  | Pt                                    | -1.077042 | 0.243218  | 0.777310  |
| C                                    | 3.732610  | 0.209847  | 3.105962  | C                                     | 1.817064  | -3.336800 | 2.607531  |
| H                                    | -2.455699 | 1.932133  | -0.736173 | H                                     | -4.641940 | 3.249631  | 1.736565  |
| C                                    | 2.149785  | 3.497582  | -1.812004 | C                                     | 4.107884  | 3.087243  | 1.367371  |
| H                                    | 2.409364  | 4.451532  | -2.253814 | H                                     | 4.802656  | 3.867215  | 1.652841  |
| C                                    | 2.043287  | -0.635942 | 1.609958  | C                                     | 1.748022  | -1.764958 | 0.780148  |
| P                                    | -3.588558 | -0.265753 | 0.711554  | P                                     | -3.270515 | 0.617324  | 1.379802  |
| H                                    | -3.246970 | -2.791622 | -0.619977 | H                                     | -6.186824 | 0.125158  | 1.327676  |
| C                                    | 0.896045  | 2.218774  | -0.208154 | C                                     | 1.921473  | 2.416234  | 0.630790  |
| C                                    | 1.237257  | 3.440280  | -0.765899 | C                                     | 2.813283  | 3.415316  | 0.986810  |
| C                                    | 3.564945  | -0.893198 | 3.928939  | C                                     | 2.718988  | -4.122224 | 1.902065  |
| C                                    | 1.870303  | -1.737349 | 2.450173  | C                                     | 2.655243  | -2.556802 | 0.077229  |
| H                                    | 0.176003  | 2.162874  | 0.603422  | H                                     | 0.902272  | 2.664426  | 0.351855  |
| H                                    | 4.155614  | -0.991543 | 4.831129  | H                                     | 3.094225  | -5.040440 | 2.336464  |
| H                                    | 0.785168  | 4.348788  | -0.387420 | H                                     | 2.494790  | 4.450097  | 0.976326  |
| H                                    | 1.127803  | -2.488963 | 2.203908  | H                                     | 2.986029  | -2.257361 | -0.910593 |
| C                                    | -4.298532 | -0.880125 | 2.300750  | C                                     | -3.476001 | 1.321753  | 3.064962  |
| H                                    | -5.352784 | -0.594060 | 2.308761  | C                                     | 3.136773  | -3.731092 | 0.637841  |
| C                                    | 2.633173  | -1.869342 | 3.597619  | S                                     | -0.326087 | 1.168203  | 2.942086  |
| S                                    | -0.982817 | 0.319750  | 2.804777  | H                                     | -1.019570 | 0.767521  | 5.164661  |
| H                                    | -3.077437 | 1.552685  | 3.013209  | C                                     | -1.348917 | 0.327976  | 4.222843  |
| H                                    | -4.297471 | -1.965095 | 2.184192  | H                                     | 3.840254  | -4.340779 | 0.084681  |
| C                                    | -2.626879 | 0.703436  | 3.532002  | H                                     | -1.047597 | -0.720177 | 4.259681  |
| H                                    | 2.493390  | -2.728785 | 4.241182  | C                                     | -2.887896 | 0.409844  | 4.132745  |
| H                                    | -2.416297 | 1.041366  | 4.547014  | H                                     | -2.984600 | 2.296431  | 3.073962  |
| C                                    | -3.593165 | -0.470649 | 3.601925  | H                                     | -4.543157 | 1.472484  | 3.244330  |
| H                                    | -3.051146 | -1.329893 | 4.000622  | H                                     | -3.275005 | 0.742449  | 5.097951  |
| H                                    | -4.366348 | -0.234222 | 4.338283  | H                                     | -3.294441 | -0.595951 | 3.994037  |

## BP86-D3/SVP:

| <i>cis-5</i> |           |           |           | <i>trans-5</i> |           |           |           |
|--------------|-----------|-----------|-----------|----------------|-----------|-----------|-----------|
| H            | -4.703521 | 3.196528  | -4.597269 | H              | -8.251089 | -2.705108 | 2.470850  |
| H            | -3.225659 | 1.164033  | -4.530745 | H              | -6.747907 | -2.670504 | 0.455998  |
| C            | -4.618302 | 2.604602  | -3.672175 | C              | -7.216684 | -2.335886 | 2.558300  |
| C            | -3.789344 | 1.467527  | -3.633797 | C              | -6.375157 | -2.316235 | 1.430451  |
| H            | -5.991462 | 3.865358  | -2.546489 | H              | -7.387637 | -1.879512 | 4.680880  |
| C            | -5.338468 | 2.978156  | -2.524520 | C              | -6.733785 | -1.875064 | 3.794083  |
| H            | -6.207243 | -3.609208 | -2.381785 | H              | -2.121473 | -5.757438 | 3.449772  |
| C            | -3.680522 | 0.711808  | -2.454197 | C              | -5.061760 | -1.832387 | 1.537342  |
| H            | -5.822102 | -1.206963 | -1.835392 | H              | -3.527069 | -3.701440 | 3.268975  |
| H            | -3.032715 | -0.180552 | -2.434097 | H              | -4.412425 | -1.787671 | 0.648327  |
| C            | -5.517386 | -3.339741 | -1.565870 | C              | -1.638292 | -4.777953 | 3.303698  |
| C            | -5.236839 | 2.220043  | -1.342995 | C              | -5.413075 | -1.402301 | 3.907984  |
| C            | -5.304459 | -1.985729 | -1.252692 | C              | -2.431125 | -3.619818 | 3.201322  |
| H            | -5.017376 | -5.405849 | -1.092156 | H              | 0.380012  | -5.594355 | 3.298291  |
| C            | -4.409200 | 1.076327  | -1.295361 | C              | -4.565431 | -1.376494 | 2.779461  |
| C            | -4.850521 | -4.345429 | -0.844004 | C              | -0.238728 | -4.685930 | 3.219439  |
| H            | -5.810287 | 2.517606  | -0.451011 | H              | -5.045350 | -1.045883 | 4.882268  |
| H            | -0.868445 | 1.430207  | -1.038414 | H              | -0.915629 | 1.005225  | -1.063555 |
| H            | -2.036235 | 2.557299  | -0.756563 | H              | -2.113509 | 2.130956  | -0.917287 |
| C            | -4.418283 | -1.624403 | -0.211454 | C              | -1.823705 | -2.360358 | 3.007163  |
| N            | -1.291008 | 2.012948  | -0.298361 | N              | -1.324455 | 1.698645  | -0.416367 |
| C            | -3.962377 | -3.992644 | 0.187426  | C              | 0.369057  | -3.430786 | 3.029771  |
| P            | -4.113393 | 0.139860  | 0.281562  | P              | -2.804954 | -0.789649 | 2.882200  |
| C            | -3.741053 | -2.640366 | 0.499264  | C              | -0.414926 | -2.271149 | 2.917177  |
| H            | -3.427982 | -4.775095 | 0.749407  | H              | 1.466100  | -3.352654 | 2.961559  |
| C            | -0.256470 | 2.908727  | 0.293147  | C              | -0.299409 | 2.722012  | -0.041679 |
| H            | 1.338873  | 1.438691  | 0.440906  | H              | 1.306142  | 1.331214  | 0.423846  |
| H            | -7.066145 | -0.578498 | 0.226946  | H              | -2.250545 | -1.928653 | 5.614060  |
| C            | -5.578709 | 0.576413  | 1.337081  | C              | -2.683104 | -0.056051 | 4.578333  |
| Pt           | -2.109230 | 0.615680  | 1.230118  | Pt             | -2.072101 | 0.544783  | 1.243634  |
| C            | -6.883134 | 0.102291  | 1.072821  | C              | -2.420415 | -0.845498 | 5.719745  |
| H            | -3.026482 | -2.355736 | 1.288471  | H              | 0.055472  | -1.284078 | 2.754035  |
| H            | -0.783661 | 3.628478  | 0.952973  | H              | -0.838057 | 3.558598  | 0.449165  |
| C            | 0.733675  | 2.090196  | 1.112231  | C              | 0.705668  | 2.120181  | 0.932525  |
| H            | -4.334664 | 1.767243  | 2.656742  | H              | -3.042625 | 1.954028  | 3.829024  |
| C            | -5.363061 | 1.426366  | 2.444269  | C              | -2.875659 | 1.335428  | 4.725411  |
| H            | 1.442612  | 2.770409  | 1.629254  | H              | 1.417144  | 2.908531  | 1.257181  |
| C            | -7.954805 | 0.483338  | 1.897683  | C              | -2.363226 | -0.250284 | 6.992051  |
| H            | -8.967661 | 0.104492  | 1.686371  | H              | -2.150660 | -0.872244 | 7.876336  |
| H            | -2.516650 | -0.357743 | 2.395440  | H              | -3.319611 | 0.096923  | 0.342720  |
| S            | -0.123144 | 1.062877  | 2.396488  | S              | -0.141264 | 1.443995  | 2.428500  |
| C            | -6.438755 | 1.807508  | 3.266025  | C              | -2.823359 | 1.924210  | 6.000061  |
| C            | -7.735256 | 1.338083  | 2.993724  | C              | -2.568076 | 1.133696  | 7.134439  |
| H            | -6.258040 | 2.467401  | 4.129513  | H              | -2.969312 | 3.011083  | 6.104355  |
| H            | -8.577135 | 1.631174  | 3.641375  | H              | -2.518148 | 1.598770  | 8.132097  |
| H            | 0.265988  | 3.483631  | -0.508423 | H              | 0.198713  | 3.112233  | -0.960765 |

| <i>cis-6</i> |           |           |           | <i>trans-6</i> |           |           |           |
|--------------|-----------|-----------|-----------|----------------|-----------|-----------|-----------|
| H            | -4.243311 | 3.693534  | -4.066536 | H              | -8.197658 | -2.909262 | 2.292017  |
| H            | -2.867853 | 1.591707  | -4.117892 | H              | -6.730043 | -2.479660 | 0.297566  |
| C            | -4.285214 | 2.985765  | -3.223807 | C              | -7.192274 | -2.479701 | 2.427877  |
| C            | -3.515064 | 1.807470  | -3.253299 | C              | -6.370619 | -2.238721 | 1.310687  |
| H            | -5.711629 | 4.175611  | -2.086835 | H              | -7.369395 | -2.344065 | 4.594520  |
| C            | -5.104652 | 3.256575  | -2.113875 | C              | -6.728911 | -2.164181 | 3.716398  |
| H            | -5.935903 | -3.464284 | -2.621177 | H              | -1.989844 | -5.677067 | 2.924477  |
| C            | -3.561327 | 0.908632  | -2.175834 | C              | -5.094537 | -1.679672 | 1.481028  |
| H            | -5.675761 | -1.094319 | -1.872719 | H              | -3.496183 | -3.680597 | 2.938103  |
| H            | -2.947680 | -0.007371 | -2.193755 | H              | -4.455259 | -1.466412 | 0.609361  |
| C            | -5.319260 | -3.234656 | -1.737506 | C              | -1.554989 | -4.664767 | 2.917775  |
| C            | -5.154369 | 2.358392  | -1.031305 | C              | -5.445394 | -1.616139 | 3.893094  |
| C            | -5.178997 | -1.902625 | -1.312153 | C              | -2.403736 | -3.542587 | 2.923326  |
| H            | -4.779852 | -5.313293 | -1.376388 | H              | 0.502443  | -5.375622 | 2.898776  |
| C            | -4.382521 | 1.177284  | -1.054820 | C              | -4.621162 | -1.369732 | 2.774565  |
| H            | 2.382298  | 4.920213  | -1.616620 | H              | 2.606876  | 4.722715  | -1.668416 |
| O            | 0.125806  | 3.476567  | -1.765177 | O              | 0.372924  | 3.240757  | -1.773439 |
| C            | -4.670625 | -4.269834 | -1.040301 | C              | -0.159937 | -4.495118 | 2.904180  |
| H            | -5.792308 | 2.577749  | -0.160238 | H              | -5.087246 | -1.376857 | 4.906266  |
| H            | -1.205034 | 1.710252  | -0.847597 | H              | -1.000761 | 1.627896  | -0.735364 |
| H            | -2.352600 | 2.748232  | -0.334497 | H              | -2.219834 | 2.680320  | -0.434054 |
| C            | 1.649478  | 5.579755  | -1.107594 | C              | 1.835279  | 5.442773  | -1.326329 |
| C            | -4.385452 | -1.597328 | -0.182958 | C              | -1.853015 | -2.244084 | 2.908259  |
| C            | 0.183987  | 3.798939  | -0.588989 | C              | 0.334693  | 3.742121  | -0.660528 |
| H            | 2.169832  | 6.384388  | -0.557360 | H              | 2.308592  | 6.327685  | -0.864098 |
| N            | -1.567116 | 2.171829  | 0.005693  | N              | -1.442212 | 2.180676  | 0.021991  |
| C            | -3.872925 | -3.969128 | 0.078459  | C              | 0.388856  | -3.198544 | 2.894238  |
| P            | -4.185373 | 0.124707  | 0.449016  | P              | -2.900473 | -0.722821 | 2.954299  |
| O            | 0.900741  | 4.843534  | -0.120304 | O              | 1.008480  | 4.854727  | -0.301489 |
| C            | -3.723464 | -2.638332 | 0.503659  | C              | -0.449739 | -2.072937 | 2.890626  |
| H            | -3.353004 | -4.775402 | 0.619689  | H              | 1.482030  | -3.061391 | 2.883600  |
| C            | -0.494491 | 3.037857  | 0.551033  | C              | -0.431918 | 3.153879  | 0.524073  |
| H            | 1.072994  | 1.532492  | 0.581310  | H              | 1.124137  | 1.696177  | 0.944929  |
| H            | -7.092746 | -0.602675 | 0.095729  | H              | -2.269777 | -2.142417 | 5.516597  |
| C            | -5.717385 | 0.448521  | 1.428488  | C              | -2.800263 | -0.184143 | 4.714550  |
| Pt           | -2.247905 | 0.635338  | 1.470634  | Pt             | -2.205041 | 0.810592  | 1.504668  |
| C            | -6.990185 | 0.002067  | 1.010227  | C              | -2.488985 | -1.088922 | 5.752415  |
| H            | -3.078177 | -2.391541 | 1.361886  | H              | -0.029023 | -1.051278 | 2.876004  |
| H            | -0.948576 | 3.753290  | 1.267532  | H              | -0.961665 | 3.959122  | 1.073627  |
| C            | 0.537149  | 2.181971  | 1.310086  | C              | 0.529900  | 2.454166  | 1.504387  |
| H            | -4.594630 | 1.533407  | 2.937622  | H              | -3.269079 | 1.877274  | 4.200420  |
| C            | -5.597507 | 1.205884  | 2.613581  | C              | -3.061746 | 1.169238  | 5.018641  |
| H            | 1.286708  | 2.849214  | 1.781938  | H              | 1.237645  | 3.207246  | 1.906704  |
| C            | -8.130514 | 0.318945  | 1.766183  | C              | -2.449682 | -0.642888 | 7.084424  |
| H            | -9.120585 | -0.034580 | 1.436727  | H              | -2.200017 | -1.351067 | 7.890549  |
| H            | -2.598653 | -0.430085 | 2.571322  | H              | -3.372463 | 0.392520  | 0.492962  |
| S            | -0.267602 | 1.155862  | 2.623528  | S              | -0.397187 | 1.680011  | 2.895630  |
| C            | -6.742485 | 1.521437  | 3.366543  | C              | -3.023619 | 1.608238  | 6.352258  |
| C            | -8.008593 | 1.080595  | 2.943737  | C              | -2.719025 | 0.704465  | 7.385796  |
| H            | -6.641392 | 2.109744  | 4.292345  | H              | -3.220375 | 2.667053  | 6.583157  |
| H            | -8.904751 | 1.324791  | 3.536343  | H              | -2.681438 | 1.053174  | 8.430252  |
| H            | 0.972270  | 6.008432  | -1.874947 | H              | 1.222126  | 5.741819  | -2.201275 |

| <i>cis-7</i> |           |           |           | <i>trans-7</i> |           |           |           |
|--------------|-----------|-----------|-----------|----------------|-----------|-----------|-----------|
| H            | -4.201908 | 3.919130  | -3.840011 | H              | -8.200578 | -2.880686 | 2.231546  |
| H            | -2.809393 | 1.832036  | -3.972200 | H              | -6.738016 | -2.321479 | 0.265719  |
| C            | -4.252178 | 3.170074  | -3.034218 | C              | -7.197920 | -2.453396 | 2.392444  |
| C            | -3.472591 | 2.000004  | -3.109119 | C              | -6.379084 | -2.139811 | 1.291306  |
| H            | -5.706327 | 4.292032  | -1.863818 | H              | -7.373606 | -2.450079 | 4.563443  |
| C            | -5.091896 | 3.379683  | -1.926210 | C              | -6.735268 | -2.213213 | 3.697355  |
| H            | -5.868848 | -3.312352 | -2.775598 | H              | -1.976524 | -5.641364 | 2.694837  |
| C            | -3.529770 | 1.048386  | -2.078545 | C              | -5.106567 | -1.583574 | 1.494236  |
| H            | -5.637477 | -0.980996 | -1.906740 | H              | -3.494681 | -3.658717 | 2.832590  |
| H            | -2.908560 | 0.138859  | -2.131379 | H              | -4.469617 | -1.313684 | 0.636659  |
| C            | -5.266652 | -3.122784 | -1.872668 | C              | -1.547771 | -4.627718 | 2.745816  |
| C            | -5.152546 | 2.428422  | -0.890529 | C              | -5.455184 | -1.668346 | 3.905966  |
| C            | -5.142568 | -1.812655 | -1.379674 | C              | -2.403173 | -3.513150 | 2.821094  |
| H            | -4.716576 | -5.213043 | -1.607486 | H              | 0.513775  | -5.323337 | 2.676019  |
| C            | -4.371381 | 1.255228  | -0.959554 | C              | -4.633788 | -1.349339 | 2.803822  |
| H            | 2.094339  | 5.079006  | -1.450771 | H              | 2.307607  | 4.996336  | -1.506822 |
| O            | 0.112293  | 3.624098  | -1.485979 | O              | 0.314734  | 3.555235  | -1.466163 |
| C            | -4.620146 | -4.186891 | -1.218371 | C              | -0.153837 | -4.448833 | 2.736110  |
| H            | -5.806366 | 2.599889  | -0.020485 | H              | -5.097520 | -1.488476 | 4.931534  |
| H            | -1.206870 | 1.805469  | -0.676888 | H              | -1.037451 | 1.876250  | -0.522276 |
| H            | -2.367623 | 2.808265  | -0.126318 | H              | -2.258680 | 2.904148  | -0.154853 |
| H            | 1.362892  | 7.463966  | -1.965580 | H              | 1.646043  | 7.291048  | -2.393490 |
| H            | -0.023158 | 6.321111  | -1.966678 | H              | 0.247199  | 6.166535  | -2.330957 |
| C            | 1.630050  | 5.733488  | -0.683447 | C              | 1.804289  | 5.754251  | -0.870619 |
| C            | -4.367539 | -1.558432 | -0.225224 | C              | -1.860368 | -2.212522 | 2.880038  |
| C            | 0.162857  | 3.888951  | -0.293995 | C              | 0.292122  | 3.987610  | -0.323014 |
| H            | 2.426348  | 6.182344  | -0.057327 | H              | 2.564464  | 6.281457  | -0.260988 |
| N            | -1.583043 | 2.219607  | 0.194434  | N              | -1.478594 | 2.380218  | 0.268510  |
| C            | 0.748126  | 6.795438  | -1.327925 | C              | 0.981109  | 6.720446  | -1.712577 |
| C            | -3.840854 | -3.936751 | -0.074469 | C              | 0.387073  | -3.150507 | 2.800024  |
| P            | -4.188932 | 0.131623  | 0.493686  | P              | -2.916986 | -0.703279 | 3.020538  |
| O            | 0.869977  | 4.906341  | 0.241344  | O              | 0.974065  | 5.067517  | 0.108836  |
| C            | -3.707600 | -2.627772 | 0.418460  | C              | -0.458241 | -2.031878 | 2.866262  |
| H            | -3.322568 | -4.765365 | 0.433569  | H              | 1.479343  | -3.006087 | 2.792678  |
| C            | -0.523584 | 3.063894  | 0.796699  | C              | -0.469866 | 3.324608  | 0.825723  |
| H            | 1.056036  | 1.571326  | 0.771655  | H              | 1.093157  | 1.851300  | 1.156817  |
| H            | -7.085694 | -0.596042 | 0.060829  | H              | -2.275757 | -2.273798 | 5.490296  |
| H            | 0.246865  | 7.414560  | -0.556288 | H              | 0.439111  | 7.443096  | -1.069202 |
| C            | -5.737803 | 0.397235  | 1.464159  | C              | -2.817134 | -0.272819 | 4.810449  |
| Pt           | -2.270556 | 0.603854  | 1.567671  | Pt             | -2.233049 | 0.919714  | 1.665964  |
| C            | -7.001011 | -0.036467 | 1.005407  | C              | -2.499623 | -1.237843 | 5.790539  |
| H            | -3.076456 | -2.419504 | 1.297171  | H              | -0.043866 | -1.008435 | 2.910101  |
| H            | -0.992010 | 3.739358  | 1.542216  | H              | -1.001076 | 4.094246  | 1.422920  |
| C            | 0.504264  | 2.177929  | 1.525068  | C              | 0.495666  | 2.571297  | 1.761214  |
| H            | -4.645190 | 1.414248  | 3.040972  | H              | -3.296661 | 1.813920  | 4.424323  |
| C            | -5.640871 | 1.096257  | 2.686597  | C              | -3.084445 | 1.058110  | 5.197279  |
| H            | 1.241324  | 2.825677  | 2.041478  | H              | 1.200216  | 3.302078  | 2.207566  |
| C            | -8.154589 | 0.235090  | 1.758874  | C              | -2.459880 | -0.874045 | 7.147279  |
| H            | -9.137098 | -0.108344 | 1.397638  | H              | -2.205321 | -1.629039 | 7.908120  |
| H            | -2.626461 | -0.520133 | 2.606892  | H              | -3.400815 | 0.558889  | 0.632568  |
| S            | -0.309674 | 1.078552  | 2.772227  | S              | -0.426024 | 1.709867  | 3.104126  |
| C            | -6.799021 | 1.366527  | 3.437025  | C              | -3.045766 | 1.414858  | 6.555208  |
| C            | -8.055502 | 0.938449  | 2.974235  | C              | -2.734906 | 0.451046  | 7.531013  |
| H            | -6.715853 | 1.909138  | 4.392061  | H              | -3.247015 | 2.456621  | 6.850770  |
| H            | -8.961981 | 1.146967  | 3.564768  | H              | -2.696875 | 0.735384  | 8.594787  |

| <i>cis</i> -8 |           |           |           | <i>trans</i> -8 |           |           |           |
|---------------|-----------|-----------|-----------|-----------------|-----------|-----------|-----------|
| H             | -6.391503 | -1.588149 | -4.591321 | H               | 2.498778  | -2.148348 | -5.314430 |
| H             | -5.841603 | 0.605497  | -3.489279 | H               | 0.552265  | -0.585646 | -5.014547 |
| C             | -5.424034 | -1.451091 | -4.082505 | C               | 2.222984  | -1.794514 | -4.308121 |
| C             | -5.116796 | -0.223518 | -3.466449 | C               | 1.133269  | -0.920051 | -4.140140 |
| H             | -4.724498 | -3.465650 | -4.522834 | H               | 3.802329  | -2.910752 | -3.306784 |
| C             | -4.491995 | -2.501240 | -4.043199 | C               | 2.952298  | -2.220302 | -3.185643 |
| H             | -7.414998 | 2.990545  | -0.700731 | H               | -7.206200 | 3.293684  | 0.010742  |
| C             | -3.887186 | -0.049791 | -2.812077 | C               | 0.771789  | -0.480286 | -2.856767 |
| H             | -3.660940 | 0.911760  | -2.323602 | H               | -0.100083 | 0.179834  | -2.721602 |
| H             | -5.939586 | 5.010115  | -0.929892 | H               | -5.633157 | 5.172792  | -0.535538 |
| C             | -3.253991 | -2.328299 | -3.395960 | C               | 2.601877  | -1.770186 | -1.899217 |
| C             | -6.348748 | 2.929981  | -0.428867 | C               | -6.117459 | 3.125080  | 0.027024  |
| C             | -5.523042 | 4.060056  | -0.558829 | C               | -5.235482 | 4.177408  | -0.280420 |
| C             | -2.940474 | -1.100166 | -2.774537 | C               | 1.507701  | -0.895579 | -1.723873 |
| H             | -2.528763 | -3.156303 | -3.376582 | H               | 3.182087  | -2.108802 | -1.027280 |
| H             | -6.478609 | 0.836172  | 0.132152  | H               | -6.314547 | 1.033139  | 0.575829  |
| H             | -5.307673 | -4.350145 | -0.550633 | H               | -5.054281 | -3.061901 | -2.780217 |
| H             | -1.632460 | -0.052612 | -4.766084 | H               | 2.932757  | 1.262537  | -1.837325 |
| C             | -5.821440 | 1.714931  | 0.045985  | C               | -5.614332 | 1.853682  | 0.349960  |
| H             | -0.433496 | 1.593473  | -6.203573 | H               | 3.938871  | 3.539962  | -1.647775 |
| H             | -7.447785 | -4.259388 | 0.764364  | H               | -7.063104 | -3.893600 | -1.520141 |
| H             | 0.169446  | -1.957127 | -4.220887 | H               | 3.813401  | -0.006548 | 1.036105  |
| C             | -5.538840 | -3.471392 | 0.071779  | C               | -5.265380 | -2.686696 | -1.766188 |
| C             | -4.159623 | 3.968344  | -0.224853 | C               | -3.847821 | 3.953809  | -0.269568 |
| H             | -3.501522 | 4.844754  | -0.336795 | H               | -3.152846 | 4.772166  | -0.516652 |
| H             | 0.205729  | -0.291334 | 0.162272  | H               | -1.552280 | -0.343591 | -1.147147 |
| C             | -6.734610 | -3.420709 | 0.807613  | C               | -6.388598 | -3.153833 | -1.060256 |
| H             | -3.682706 | -2.447166 | -0.431674 | H               | -3.501246 | -1.404211 | -1.713996 |
| C             | -0.837548 | 0.571598  | -4.328619 | C               | 2.682009  | 1.898882  | -0.974525 |
| C             | -4.627206 | -2.402797 | 0.131153  | C               | -4.398877 | -1.751311 | -1.177648 |
| C             | -0.164789 | 1.503496  | -5.138733 | C               | 3.249043  | 3.182266  | -0.866511 |
| C             | -4.456354 | 1.617740  | 0.393583  | C               | -4.220363 | 1.624748  | 0.367098  |
| C             | -7.014376 | -2.298874 | 1.608809  | C               | -6.642021 | -2.681738 | 0.238878  |
| C             | -3.625541 | 2.754084  | 0.238069  | C               | -3.339901 | 2.681752  | 0.048168  |
| C             | 0.227986  | -2.669476 | -3.382930 | C               | 3.356077  | -0.915286 | 1.458434  |
| H             | -7.945094 | -2.257323 | 2.197067  | H               | -7.514932 | -3.049940 | 0.801302  |
| H             | 1.414257  | -4.100077 | -4.509670 | H               | 5.128911  | -1.448284 | 2.597312  |
| P             | -1.350093 | -0.802879 | -1.862207 | P               | 1.014923  | -0.252027 | -0.052763 |
| C             | -4.902838 | -1.266900 | 0.921187  | C               | -4.653247 | -1.261786 | 0.123313  |
| C             | -0.508623 | 0.444762  | -2.959194 | C               | 1.792256  | 1.431919  | 0.017047  |
| C             | -6.104802 | -1.229611 | 1.668575  | C               | -5.780681 | -1.739859 | 0.829647  |
| Pt            | -1.387822 | -0.187728 | 0.346485  | Pt              | -1.249660 | -0.190697 | 0.420007  |
| C             | 0.931975  | -3.875475 | -3.544779 | C               | 4.094842  | -1.726119 | 2.337503  |
| H             | -2.547634 | 2.668782  | 0.459537  | H               | -2.253651 | 2.484353  | 0.044002  |
| C             | 0.840938  | 2.319497  | -4.592435 | C               | 2.938155  | 4.002533  | 0.231197  |
| H             | 1.364650  | 3.051749  | -5.227660 | H               | 3.382885  | 5.007411  | 0.313088  |
| C             | -0.386524 | -2.365191 | -2.148032 | C               | 2.026711  | -1.257684 | 1.125803  |
| P             | -3.639371 | 0.079434  | 1.035505  | P               | -3.498859 | -0.014106 | 0.843139  |
| H             | -6.334673 | -0.365414 | 2.311837  | H               | -5.992771 | -1.386775 | 1.850775  |
| C             | 0.496094  | 1.276367  | -2.415420 | C               | 1.476205  | 2.261763  | 1.118226  |
| C             | 1.168155  | 2.203444  | -3.229875 | C               | 2.054533  | 3.537310  | 1.222893  |
| C             | 1.028439  | -4.787498 | -2.478229 | C               | 3.514270  | -2.882392 | 2.888736  |
| C             | -0.274208 | -3.279054 | -1.077075 | C               | 1.443841  | -2.412839 | 1.692539  |
| H             | 0.735869  | 1.198864  | -1.342959 | H               | 0.770111  | 1.896619  | 1.886975  |
| H             | 1.948305  | 2.845763  | -2.791060 | H               | 4.093879  | -3.513946 | 3.581026  |
| H             | -0.722112 | -3.015904 | -0.103290 | H               | 1.806036  | 4.176084  | 2.085739  |
| C             | -3.554377 | 0.363893  | 2.890612  | H               | 0.394421  | -2.657941 | 1.462338  |
| H             | -4.494229 | 0.842855  | 3.242908  | C               | -3.742646 | -0.107255 | 2.693965  |
| C             | 0.425046  | -4.486936 | -1.244445 | H               | -4.730806 | 0.320016  | 2.975881  |
| S             | -0.760268 | 0.523270  | 2.503982  | C               | 2.189137  | -3.223242 | 2.565450  |
| H             | -2.459282 | 2.248362  | 2.967658  | S               | -0.925921 | -0.008883 | 2.830563  |
| H             | -3.486898 | -0.652612 | 3.334523  | H               | -2.654824 | 1.710896  | 3.218100  |
| C             | -2.322510 | 1.183828  | 3.257144  | H               | -3.728892 | -1.187437 | 2.954940  |
| H             | 0.509678  | -5.189593 | -0.400195 | C               | -2.582228 | 0.613988  | 3.384435  |
| H             | -2.168528 | 1.165236  | 4.357314  | H               | 1.724347  | -4.119070 | 3.006799  |
| H             | 1.585052  | -5.729676 | -2.606741 | H               | -2.637319 | 0.446137  | 4.481074  |

| <i>cis-9</i> |           |           |           | <i>trans-9</i> |           |           |           |
|--------------|-----------|-----------|-----------|----------------|-----------|-----------|-----------|
| H            | 3.136301  | -4.053697 | -5.048499 | H              | 3.155801  | 1.245680  | -5.506828 |
| H            | 2.506024  | -1.658492 | -4.617494 | H              | 1.226660  | 2.344914  | -4.328846 |
| C            | 2.667189  | -3.767380 | -4.093545 | C              | 2.921926  | 0.981362  | -4.462974 |
| H            | -6.183395 | 1.917792  | -3.960712 | H              | -5.336257 | 1.914495  | -4.269919 |
| H            | -4.508891 | 2.441051  | -4.330022 | H              | -3.644910 | 2.507336  | -4.303929 |
| H            | 2.675802  | -5.796082 | -3.298635 | H              | 4.545073  | -0.462082 | -4.298489 |
| H            | -4.863967 | 0.705283  | -4.058058 | H              | -3.974859 | 0.753851  | -4.130240 |
| C            | 2.315352  | -2.427793 | -3.852291 | C              | 1.841349  | 1.596566  | -3.803294 |
| C            | -5.114121 | 1.733375  | -3.722232 | C              | -4.325718 | 1.764410  | -3.833532 |
| H            | -3.195432 | -3.183568 | -4.218915 | H              | -2.573696 | -3.623589 | -3.857093 |
| C            | 2.409974  | -4.742774 | -3.113999 | C              | 3.699159  | 0.025340  | -3.787610 |
| H            | -5.685046 | -3.482228 | -4.048915 | H              | -5.073301 | -3.744089 | -4.079275 |
| C            | -3.732986 | -2.849733 | -3.317094 | C              | -3.219803 | -3.145019 | -3.104053 |
| C            | -5.125986 | -3.014086 | -3.223017 | C              | -4.618375 | -3.212081 | -3.228472 |
| H            | -6.301083 | 3.513613  | -1.909929 | H              | -5.908616 | 3.458564  | -2.256375 |
| H            | -4.664602 | 4.079845  | -2.332810 | H              | -4.246001 | 4.094956  | -2.345666 |
| C            | 1.710899  | -2.061965 | -2.637244 | C              | 1.531856  | 1.254800  | -2.477052 |
| C            | -4.832293 | 1.918975  | -2.224035 | C              | -4.342966 | 1.927034  | -2.306541 |
| C            | -5.219446 | 3.323917  | -1.728788 | C              | -4.875261 | 3.304638  | -1.872648 |
| C            | 1.808949  | -4.380805 | -1.895641 | C              | 3.402936  | -0.314715 | -2.454494 |
| H            | 1.417805  | -1.016162 | -2.448711 | H              | 0.674052  | 1.720344  | -1.959270 |
| H            | -2.723321 | 2.365078  | -2.477782 | H              | -2.244762 | 2.456673  | -2.143855 |
| H            | -5.457292 | 1.178479  | -1.668991 | H              | -5.031718 | 1.151234  | -1.893659 |
| H            | -1.931855 | -2.092191 | -2.335397 | H              | -1.543037 | -2.391020 | -1.916262 |
| C            | -3.021547 | -2.249897 | -2.262800 | C              | -2.638390 | -2.461746 | -2.021444 |
| C            | -5.806928 | -2.571139 | -2.074110 | C              | -5.437758 | -2.596008 | -2.264805 |
| H            | -6.899621 | -2.690860 | -1.999058 | H              | -6.534416 | -2.645801 | -2.357812 |
| H            | -3.049042 | 0.641097  | -2.250204 | H              | -2.536285 | 0.715164  | -2.008402 |
| C            | 1.458481  | -3.033839 | -1.642707 | C              | 2.318109  | 0.298574  | -1.792292 |
| H            | 1.598588  | -5.158434 | -1.144572 | H              | 4.018906  | -1.062537 | -1.931510 |
| C            | -3.348229 | 1.650677  | -1.896439 | C              | -2.939594 | 1.706206  | -1.704341 |
| C            | -4.886804 | 3.513956  | -0.242703 | C              | -4.842564 | 3.470665  | -0.347088 |
| H            | -5.141476 | 4.550145  | 0.071152  | H              | -5.194591 | 4.488969  | -0.070981 |
| C            | -3.694669 | -1.809846 | -1.102162 | C              | -3.453876 | -1.841086 | -1.050058 |
| C            | -5.097536 | -1.969541 | -1.020432 | C              | -4.860391 | -1.913976 | -1.180288 |
| H            | -2.808754 | 3.922793  | -0.575497 | H              | -2.756251 | 3.962688  | -0.262096 |
| H            | -5.538186 | 2.845804  | 0.364422  | H              | -5.572190 | 2.765362  | 0.110894  |
| C            | -2.959982 | 1.809011  | -0.402373 | C              | -2.849691 | 1.843885  | -0.161283 |
| C            | -3.398623 | 3.241010  | 0.080625  | C              | -3.435061 | 3.244004  | 0.252929  |
| P            | 0.697016  | -2.479545 | -0.037634 | P              | 1.858906  | -0.097893 | -0.040282 |
| H            | -5.644335 | -1.626150 | -0.127279 | H              | -5.514701 | -1.444321 | -0.428045 |
| H            | -4.636489 | 0.569688  | 0.358167  | H              | -4.615445 | 0.556207  | 0.263175  |
| Pt           | -0.439003 | -0.491765 | -0.176836 | Pt             | -0.410403 | -0.507147 | 0.170394  |
| S            | -1.068471 | 1.766688  | -0.301703 | S              | -1.023235 | 1.840789  | 0.324819  |
| P            | -2.710660 | -0.972844 | 0.225408  | P              | -2.651738 | -0.948239 | 0.353858  |
| C            | -3.537893 | 0.688689  | 0.482162  | C              | -3.552267 | 0.677275  | 0.566440  |
| H            | -3.292475 | 5.784204  | 1.301865  | H              | -3.690648 | 5.753254  | 1.523953  |
| H            | -1.620928 | 5.218168  | 0.970229  | H              | -1.960590 | 5.271988  | 1.507437  |
| H            | -4.185432 | -3.562741 | 0.899316  | H              | -4.092425 | -3.577944 | 0.838551  |
| C            | -2.505176 | 5.066164  | 1.623154  | C              | -2.944577 | 5.061537  | 1.975236  |
| C            | -3.006171 | 3.610885  | 1.551663  | C              | -3.350028 | 3.588174  | 1.778928  |
| H            | -4.955861 | 4.090531  | 2.482199  | H              | -5.462487 | 3.953922  | 2.327698  |
| H            | -3.351116 | 0.923709  | 1.548645  | H              | -3.541678 | 0.859206  | 1.659284  |
| H            | -2.138885 | 2.960745  | 1.807427  | H              | -2.516765 | 2.969249  | 2.182560  |
| C            | -3.837227 | -3.093907 | 1.831622  | C              | -3.792531 | -3.153372 | 1.808758  |
| C            | -3.137145 | -1.869603 | 1.791162  | C              | -3.121542 | -1.913544 | 1.862386  |
| C            | -4.105276 | 3.387413  | 2.610690  | C              | -4.619166 | 3.284154  | 2.601182  |
| H            | -4.523322 | 2.359860  | 2.597970  | H              | -4.976395 | 2.240477  | 2.484197  |
| H            | -2.212078 | 5.342280  | 2.658654  | H              | -2.868744 | 5.319659  | 3.053295  |
| H            | -4.639185 | -4.683737 | 3.075321  | H              | -4.601554 | -4.824642 | 2.937675  |
| H            | -3.694583 | 3.560761  | 3.628137  | H              | -4.419924 | 3.441873  | 3.682560  |
| C            | -4.089358 | -3.729157 | 3.061434  | C              | -4.077840 | -3.856846 | 2.993550  |
| C            | -2.666402 | -1.311852 | 3.004615  | C              | -2.724743 | -1.398809 | 3.119290  |
| H            | -2.079683 | -0.378403 | 2.988214  | H              | -2.164060 | -0.450730 | 3.169724  |
| C            | -3.644206 | -3.154500 | 4.262984  | C              | -3.698127 | -3.331368 | 4.239505  |
| C            | -2.926439 | -1.944758 | 4.230203  | C              | -3.019408 | -2.099967 | 4.298833  |
| H            | -3.848140 | -3.651657 | 5.224737  | H              | -3.923928 | -3.883796 | 5.165495  |
| H            | -2.559808 | -1.492358 | 5.165510  | H              | -2.707255 | -1.686341 | 5.271056  |
| H            | 1.033517  | 0.105930  | -0.444273 | H              | -0.112753 | -2.082523 | 0.118752  |

|   |           |           |           |   |          |           |           |
|---|-----------|-----------|-----------|---|----------|-----------|-----------|
| C | -0.182346 | -4.006657 | 0.550769  | C | 3.029800 | -1.460760 | 0.433890  |
| C | -1.063236 | -4.689626 | -0.320031 | C | 2.669775 | -2.802593 | 0.179762  |
| C | -0.038180 | -4.471704 | 1.876172  | C | 4.286663 | -1.186872 | 1.018413  |
| C | -1.763133 | -5.825405 | 0.119165  | C | 3.554057 | -3.848401 | 0.491301  |
| H | -1.195138 | -4.341829 | -1.356297 | H | 1.677093 | -3.019501 | -0.246558 |
| C | -0.747253 | -5.603901 | 2.315272  | C | 5.165334 | -2.237306 | 1.338720  |
| H | 0.639191  | -3.951154 | 2.570288  | H | 4.580718 | -0.147850 | 1.232414  |
| C | -1.605214 | -6.288065 | 1.438072  | C | 4.803498 | -3.569146 | 1.073672  |
| H | -2.435338 | -6.352516 | -0.576737 | H | 3.258307 | -4.890096 | 0.288182  |
| H | -0.621327 | -5.954366 | 3.351984  | H | 6.138687 | -2.009593 | 1.802082  |
| H | -2.151948 | -7.180870 | 1.781171  | H | 5.492097 | -4.390803 | 1.328002  |
| C | 2.140225  | -2.367225 | 1.131490  | C | 2.481004 | 1.356625  | 0.922291  |
| C | 3.221579  | -3.274926 | 1.090388  | C | 3.465203 | 2.233873  | 0.416675  |
| C | 2.136445  | -1.343632 | 2.103824  | C | 1.955607 | 1.574813  | 2.215345  |
| C | 4.277298  | -3.161575 | 2.010766  | C | 3.923159 | 3.308505  | 1.199471  |
| H | 3.251369  | -4.069478 | 0.328984  | H | 3.870198 | 2.082623  | -0.596278 |
| C | 3.190709  | -1.237379 | 3.028153  | C | 2.421991 | 2.645190  | 2.996223  |
| H | 1.302962  | -0.620873 | 2.110989  | H | 1.162985 | 0.911267  | 2.596797  |
| C | 4.262835  | -2.145028 | 2.983126  | C | 3.405719 | 3.513503  | 2.490519  |
| H | 5.119888  | -3.869975 | 1.963678  | H | 4.686319 | 3.992068  | 0.794094  |
| H | 3.177193  | -0.432048 | 3.779797  | H | 2.002781 | 2.809621  | 4.001546  |
| H | 5.093771  | -2.056438 | 3.701280  | H | 3.763359 | 4.358410  | 3.100618  |

| <i>cis</i> -10 |           |           |           | <i>trans</i> -10 |           |           |           |
|----------------|-----------|-----------|-----------|------------------|-----------|-----------|-----------|
| H              | 3.546164  | -4.002988 | -5.015853 | H                | 3.708213  | -1.576834 | -5.468436 |
| H              | 3.003082  | -1.588334 | -4.572290 | H                | 1.702767  | -2.702766 | -4.455409 |
| C              | 2.990178  | -3.717220 | -4.108552 | C                | 3.355698  | -1.283002 | -4.466704 |
| H              | 2.796562  | -5.764266 | -3.387638 | H                | 4.896213  | 0.233342  | -4.195383 |
| C              | 2.687617  | -2.367184 | -3.859814 | C                | 2.233691  | -1.913547 | -3.899274 |
| H              | -3.999688 | -2.216745 | -4.192870 | H                | -3.340195 | 0.075164  | -4.476038 |
| C              | 2.570960  | -4.702530 | -3.197794 | C                | 4.020716  | -0.269903 | -3.754537 |
| H              | -6.250816 | -3.129940 | -3.546330 | H                | -5.622084 | -0.972345 | -4.574272 |
| C              | -4.319648 | -2.207138 | -3.138668 | C                | -3.789978 | -0.358056 | -3.568465 |
| C              | -5.579164 | -2.716312 | -2.777017 | C                | -5.066526 | -0.944629 | -3.623148 |
| C              | 1.971584  | -2.001302 | -2.707224 | C                | 1.776602  | -1.533734 | -2.626399 |
| C              | 1.856811  | -4.340173 | -2.042207 | C                | 3.570319  | 0.110453  | -2.477576 |
| H              | 1.716312  | -0.946038 | -2.520451 | H                | 0.885689  | -2.006654 | -2.182412 |
| H              | -2.465366 | -1.290250 | -2.424542 | H                | -2.064961 | 0.107033  | -2.303051 |
| C              | -3.460291 | -1.686689 | -2.155049 | C                | -3.076615 | -0.331038 | -2.357485 |
| C              | -5.980455 | -2.695723 | -1.428840 | C                | -5.630996 | -1.503529 | -2.462118 |
| H              | -6.967690 | -3.091163 | -1.140361 | H                | -6.628829 | -1.969170 | -2.501621 |
| C              | 1.554422  | -2.982793 | -1.781206 | C                | 2.445780  | -0.522316 | -1.901460 |
| H              | 1.522955  | -5.125149 | -1.345765 | H                | 4.092055  | 0.911182  | -1.930359 |
| C              | -4.969389 | 3.283165  | 0.026356  | C                | -4.835271 | 3.289344  | 1.615820  |
| H              | -5.259977 | 4.337390  | 0.226113  | H                | -5.142954 | 4.163345  | 2.230082  |
| C              | -3.855484 | -1.661799 | -0.797500 | C                | -3.641000 | -0.883643 | -1.185728 |
| C              | -5.128267 | -2.166958 | -0.443875 | C                | -4.925130 | -1.471990 | -1.247212 |
| H              | -3.196020 | 3.819057  | -1.152709 | H                | -2.887679 | 4.142193  | 1.067138  |
| C              | -3.002246 | 1.748158  | -0.508966 | C                | -2.821402 | 1.995277  | 0.724567  |
| C              | -3.460341 | 3.199767  | -0.269177 | C                | -3.299222 | 3.219630  | 1.528843  |
| P              | 0.647727  | -2.465375 | -0.235544 | P                | 1.836513  | -0.079364 | -0.204839 |
| H              | -5.456570 | -2.153942 | 0.606939  | H                | -5.372403 | -1.918948 | -0.345381 |
| Pt             | -0.494236 | -0.487954 | -0.410480 | Pt               | -0.446990 | -0.325736 | 0.089335  |
| S              | -1.167145 | 1.730286  | -0.817488 | S                | -0.961960 | 1.968370  | 0.674933  |
| P              | -2.686694 | -0.870849 | 0.402672  | P                | -2.680076 | -0.754017 | 0.389330  |
| C              | -3.402079 | 0.853917  | 0.678806  | C                | -3.421272 | 0.701765  | 1.318565  |
| H              | -3.407233 | -3.689600 | 1.158669  | H                | -2.795259 | -3.579642 | -0.384671 |
| H              | -2.828784 | 1.229344  | 1.558451  | H                | -2.991314 | 0.597900  | 2.343020  |
| C              | -3.270243 | -3.109547 | 2.083884  | C                | -3.057519 | -3.530976 | 0.684308  |
| C              | -2.957056 | -1.732541 | 2.018858  | C                | -3.125379 | -2.276631 | 1.334591  |
| H              | -3.647324 | -4.828538 | 3.352457  | H                | -3.256379 | -5.684542 | 0.870652  |
| C              | -3.399375 | -3.755671 | 3.325613  | C                | -3.313104 | -4.715717 | 1.392078  |
| C              | -2.745706 | -1.030041 | 3.229635  | C                | -3.437650 | -2.238539 | 2.711368  |
| H              | -2.471066 | 0.036101  | 3.212117  | H                | -3.476244 | -1.278324 | 3.247892  |
| C              | -3.207981 | -3.044086 | 4.521846  | C                | -3.632540 | -4.668267 | 2.761638  |
| C              | -2.874065 | -1.679506 | 4.468524  | C                | -3.691163 | -3.427969 | 3.418266  |
| H              | -3.311690 | -3.552306 | 5.493725  | H                | -3.830625 | -5.598879 | 3.316794  |
| H              | -2.711038 | -1.112028 | 5.398724  | H                | -3.934681 | -3.380477 | 4.491668  |
| H              | 0.918635  | 0.061746  | -0.949291 | H                | -0.191391 | -1.877845 | -0.248725 |
| C              | -0.282512 | -4.020123 | 0.172743  | C                | 2.793501  | -1.189378 | 0.928416  |
| C              | -1.261486 | -4.468851 | -0.745245 | C                | 4.055276  | -1.721611 | 0.585662  |
| C              | -0.061577 | -4.758941 | 1.353761  | C                | 2.228825  | -1.497177 | 2.186380  |
| C              | -1.986040 | -5.645272 | -0.495787 | C                | 4.744424  | -2.545668 | 1.493262  |
| H              | -1.453038 | -3.896423 | -1.667008 | H                | 4.499638  | -1.500696 | -0.397606 |
| C              | -0.794414 | -5.934456 | 1.604262  | C                | 2.925120  | -2.313581 | 3.093295  |
| H              | 0.690900  | -4.419496 | 2.081839  | H                | 1.229692  | -1.101192 | 2.435002  |
| C              | -1.751998 | -6.384116 | 0.679979  | C                | 4.182977  | -2.840155 | 2.748257  |
| H              | -2.738093 | -5.986574 | -1.224862 | H                | 5.725433  | -2.962720 | 1.214434  |
| H              | -0.608688 | -6.502823 | 2.529657  | H                | 2.476113  | -2.548218 | 4.071578  |
| H              | -2.317522 | -7.309708 | 0.873504  | H                | 4.724127  | -3.488056 | 3.456419  |
| C              | 1.984068  | -2.395895 | 1.054250  | C                | 2.569490  | 1.595658  | 0.084258  |
| C              | 3.107705  | -3.252032 | 1.043345  | C                | 2.028707  | 2.689411  | -0.631862 |
| C              | 1.858703  | -1.434957 | 2.081445  | C                | 3.617911  | 1.821019  | 1.002550  |
| C              | 4.081735  | -3.154342 | 2.051893  | C                | 2.547209  | 3.980850  | -0.444715 |
| H              | 3.233669  | -3.991724 | 0.237351  | H                | 1.186646  | 2.530264  | -1.323199 |
| C              | 2.832257  | -1.343382 | 3.091321  | C                | 4.126495  | 3.118646  | 1.191862  |
| H              | 0.995920  | -0.747169 | 2.061578  | H                | 4.040551  | 0.980783  | 1.574361  |
| C              | 3.944625  | -2.202755 | 3.078825  | C                | 3.596042  | 4.199045  | 0.466496  |
| H              | 4.957771  | -3.822316 | 2.030396  | H                | 2.116701  | 4.825296  | -1.005924 |
| H              | 2.725332  | -0.586839 | 3.884984  | H                | 4.943222  | 3.282963  | 1.912937  |
| H              | 4.712634  | -2.125223 | 3.865117  | H                | 3.995304  | 5.214916  | 0.616898  |
| C              | -5.356331 | 2.385289  | 1.212397  | C                | -5.423692 | 1.993244  | 2.196020  |
| C              | -4.910927 | 0.927213  | 0.982666  | C                | -4.959932 | 0.758109  | 1.398360  |
| H              | -5.542276 | 2.967493  | -0.875895 | H                | -5.256811 | 3.459931  | 0.598379  |
| H              | -6.453393 | 2.419410  | 1.389219  | H                | -6.534498 | 2.036934  | 2.208124  |
| H              | -4.877406 | 2.774342  | 2.140315  | H                | -5.102930 | 1.886419  | 3.257925  |



|   |           |          |           |   |           |           |           |
|---|-----------|----------|-----------|---|-----------|-----------|-----------|
| H | -5.481278 | 0.503290 | 0.126694  | H | -5.378362 | 0.808723  | 0.368627  |
| H | -5.156035 | 0.303792 | 1.870019  | H | -5.362310 | -0.171475 | 1.856658  |
| H | -2.882061 | 3.612789 | 0.588643  | H | -2.861202 | 3.158825  | 2.551222  |
| H | -3.509866 | 1.367527 | -1.425724 | H | -3.193598 | 2.099568  | -0.321520 |

| <i>cis-11-chair</i> |           |           |           | <i>trans-11-chair</i> |           |           |           |
|---------------------|-----------|-----------|-----------|-----------------------|-----------|-----------|-----------|
| H                   | 2.766426  | 0.359968  | -5.257056 | H                     | 2.920322  | -0.352102 | -5.253402 |
| H                   | 1.078892  | 1.906762  | -4.219642 | H                     | 0.896590  | 0.996176  | -4.618393 |
| C                   | 2.469400  | 0.227789  | -4.204474 | C                     | 2.576211  | -0.330274 | -4.207010 |
| C                   | 1.524364  | 1.094564  | -3.623575 | C                     | 1.443759  | 0.424821  | -3.851696 |
| H                   | 3.760400  | -1.498034 | -3.891169 | H                     | 4.146116  | -1.663440 | -3.496481 |
| C                   | 3.026059  | -0.811468 | -3.440337 | C                     | 3.262836  | -1.064168 | -3.223641 |
| H                   | 3.663134  | -0.443343 | 5.056154  | H                     | -7.400073 | 1.706110  | -1.650810 |
| C                   | 1.134767  | 0.920263  | -2.286711 | C                     | 0.997261  | 0.443803  | -2.520148 |
| H                   | 0.377360  | 1.582413  | -1.836999 | H                     | 0.096140  | 1.011683  | -2.237423 |
| H                   | 3.805286  | -2.948626 | 5.248665  | H                     | -6.228790 | 3.639320  | -2.743439 |
| C                   | 2.646146  | -0.984373 | -2.096478 | C                     | 2.825675  | -1.039432 | -1.887850 |
| C                   | 2.821756  | -1.074831 | 4.729470  | C                     | -6.345857 | 1.919774  | -1.412375 |
| C                   | 2.901055  | -2.473450 | 4.836709  | C                     | -5.689147 | 3.001223  | -2.025539 |
| C                   | 1.697246  | -0.118485 | -1.513534 | C                     | 1.688406  | -0.283423 | -1.527497 |
| H                   | 3.085489  | -1.802499 | -1.504405 | H                     | 3.370064  | -1.615587 | -1.123654 |
| H                   | 1.618300  | 0.627059  | 4.140084  | H                     | -6.180364 | 0.253492  | -0.025350 |
| H                   | -2.262966 | 4.297067  | 3.637705  | H                     | -3.947190 | -4.445898 | 0.048681  |
| H                   | 4.114385  | 0.445748  | -0.042899 | H                     | 3.133697  | 1.769469  | -0.950274 |
| C                   | 1.667247  | -0.469300 | 4.207140  | C                     | -5.660089 | 1.102516  | -0.496194 |
| H                   | 5.546232  | 2.189965  | 1.031281  | H                     | 4.372830  | 3.690610  | 0.065070  |
| H                   | -1.753011 | 4.356152  | 6.098403  | H                     | -6.031378 | -4.704738 | 1.427329  |
| H                   | 3.744328  | -1.218953 | 1.702694  | H                     | 3.770780  | -0.727541 | 1.533846  |
| C                   | -1.868398 | 3.401573  | 4.143548  | C                     | -4.363567 | -3.580835 | 0.588731  |
| C                   | 1.825920  | -3.264363 | 4.396014  | C                     | -4.338700 | 3.260416  | -1.727569 |
| H                   | 1.888415  | -4.362264 | 4.448496  | H                     | -3.817153 | 4.101834  | -2.211058 |
| H                   | -1.232088 | 0.232303  | -0.837788 | H                     | -1.353635 | 0.535643  | -0.887783 |
| C                   | -1.586629 | 3.432977  | 5.520438  | C                     | -5.530242 | -3.725888 | 1.361334  |
| H                   | -1.898389 | 2.183449  | 2.328552  | H                     | -2.789232 | -2.216125 | -0.069397 |
| C                   | 3.674371  | 1.140097  | 0.690936  | C                     | 2.985577  | 2.017258  | 0.112399  |
| C                   | -1.654998 | 2.225242  | 3.403190  | C                     | -3.718041 | -2.336443 | 0.512808  |
| C                   | 4.475692  | 2.129380  | 1.284380  | C                     | 3.682967  | 3.096762  | 0.685844  |
| C                   | 0.570978  | -1.255596 | 3.784928  | C                     | -4.305178 | 1.358291  | -0.196862 |
| C                   | -1.097328 | 2.279596  | 6.161772  | C                     | -6.051478 | -2.620903 | 2.056872  |
| C                   | 0.672753  | -2.662718 | 3.868007  | C                     | -3.645846 | 2.437937  | -0.824050 |
| C                   | 3.134046  | -2.079732 | 1.393066  | C                     | 3.158685  | -1.642594 | 1.575782  |
| H                   | -0.882063 | 2.296634  | 7.242196  | H                     | -6.960514 | -2.731331 | 2.669297  |
| H                   | 4.549406  | -3.528441 | 2.174263  | H                     | 4.691858  | -2.804901 | 2.587612  |
| P                   | 1.205673  | -0.239019 | 0.266528  | P                     | 1.126121  | -0.159242 | 0.227132  |
| C                   | -1.148868 | 1.070372  | 4.039073  | C                     | -4.241008 | -1.220612 | 1.202652  |
| C                   | 2.301800  | 1.048228  | 1.015800  | C                     | 2.098564  | 1.256483  | 0.901452  |
| C                   | -0.881735 | 1.102474  | 5.426436  | C                     | -5.411414 | -1.371606 | 1.977934  |
| Pt                  | -1.016407 | -0.087259 | 0.718048  | Pt                    | -1.118018 | 0.103852  | 0.633483  |
| C                   | 3.584289  | -3.384151 | 1.663796  | C                     | 3.672309  | -2.808205 | 2.170117  |
| H                   | -0.146952 | -3.303518 | 3.510220  | H                     | -2.578024 | 2.613651  | -0.610797 |
| C                   | 3.910763  | 3.049712  | 2.187678  | C                     | 3.503362  | 3.414082  | 2.043037  |
| H                   | 4.541184  | 3.827183  | 2.648014  | H                     | 4.052017  | 4.259254  | 2.488882  |
| C                   | 1.892924  | -1.880825 | 0.758838  | C                     | 1.851358  | -1.639531 | 1.045651  |
| P                   | -0.927108 | -0.473660 | 3.045992  | P                     | -3.351508 | 0.379555  | 1.044552  |
| H                   | -0.490727 | 0.205912  | 5.934160  | H                     | -5.830095 | -0.516883 | 2.532075  |
| C                   | 1.736045  | 1.994377  | 1.894491  | C                     | 1.913594  | 1.577834  | 2.266355  |
| C                   | 2.537678  | 2.987959  | 2.482303  | C                     | 2.620693  | 2.650178  | 2.831044  |
| C                   | 2.803462  | -4.494969 | 1.304405  | C                     | 2.884457  | -3.971011 | 2.240506  |
| C                   | 1.095517  | -3.000288 | 0.422318  | C                     | 1.059732  | -2.805411 | 1.125625  |
| H                   | 0.657993  | 1.952974  | 2.111320  | H                     | 1.210834  | 0.969294  | 2.865915  |
| H                   | 3.162247  | -5.514572 | 1.517250  | H                     | 3.286645  | -4.880990 | 2.713746  |
| H                   | 2.079995  | 3.716688  | 3.169945  | H                     | 2.478149  | 2.894571  | 3.895968  |
| H                   | 0.110103  | -2.837394 | -0.046089 | H                     | 0.025395  | -2.785551 | 0.744650  |
| C                   | -2.316566 | -1.528634 | 3.687635  | C                     | -3.720340 | 1.322468  | 2.601158  |
| C                   | 1.552974  | -4.299814 | 0.689100  | C                     | 1.577720  | -3.966923 | 1.719640  |
| S                   | -3.377394 | 0.173692  | 0.714510  | S                     | -0.834991 | -0.670040 | 2.960769  |
| H                   | -3.991149 | -2.050467 | 1.531323  | H                     | -1.199628 | 1.614824  | 3.784385  |
| C                   | -4.132382 | -1.015306 | 1.914389  | C                     | -1.652818 | 0.621131  | 4.001859  |
| H                   | 0.927811  | -5.165191 | 0.417245  | H                     | 0.950940  | -4.869831 | 1.789930  |
| H                   | -5.219334 | -0.797510 | 1.841282  | H                     | -1.375389 | 0.364899  | 5.046577  |
| C                   | -3.710211 | -0.948233 | 3.387522  | C                     | -3.181785 | 0.706540  | 3.903129  |
| H                   | -2.214369 | -2.527966 | 3.211577  | H                     | -3.271381 | 2.324694  | 2.423940  |
| H                   | -2.159015 | -1.657171 | 4.780094  | H                     | -4.820171 | 1.476911  | 2.647732  |
| H                   | -4.445413 | -1.535266 | 3.985397  | H                     | -3.557742 | 1.337237  | 4.742881  |
| H                   | -3.777986 | 0.099658  | 3.755115  | H                     | -3.615479 | -0.306942 | 4.051030  |

| <i>cis-11-skew-boat</i> |           |           |           | <i>trans-11-skew-boat</i> |           |           |           |
|-------------------------|-----------|-----------|-----------|---------------------------|-----------|-----------|-----------|
| H                       | -6.937751 | 0.493194  | -3.438483 | H                         | -6.937751 | 0.493194  | -3.438483 |
| H                       | -6.111560 | 2.166806  | -1.758195 | H                         | -6.111560 | 2.166806  | -1.758195 |
| C                       | -5.932839 | 0.385148  | -2.999940 | C                         | -5.932839 | 0.385148  | -2.999940 |
| C                       | -5.469428 | 1.325109  | -2.061878 | C                         | -5.469428 | 1.325109  | -2.061878 |
| H                       | -5.483513 | -1.445318 | -4.093396 | H                         | -5.483513 | -1.445318 | -4.093396 |
| C                       | -5.118538 | -0.701140 | -3.367617 | C                         | -5.118538 | -0.701140 | -3.367617 |
| H                       | -0.152989 | -1.397026 | 7.512682  | H                         | -0.152989 | -1.397026 | 7.512682  |
| C                       | -4.193504 | 1.183725  | -1.493380 | C                         | -4.193504 | 1.183725  | -1.493380 |
| H                       | -3.837114 | 1.896899  | -0.732433 | H                         | -3.837114 | 1.896899  | -0.732433 |
| H                       | 1.407855  | -2.958164 | 6.318572  | H                         | 1.407855  | -2.958164 | 6.318572  |
| C                       | -3.839443 | -0.846513 | -2.803650 | C                         | -3.839443 | -0.846513 | -2.803650 |
| C                       | 0.003898  | -1.297871 | 6.426791  | C                         | 0.003898  | -1.297871 | 6.426791  |
| C                       | 0.877974  | -2.172509 | 5.756751  | C                         | 0.877974  | -2.172509 | 5.756751  |
| C                       | -3.370418 | 0.100022  | -1.868349 | C                         | -3.370418 | 0.100022  | -1.868349 |
| H                       | -3.205847 | -1.703185 | -3.083474 | H                         | -3.205847 | -1.703185 | -3.083474 |
| H                       | -1.365732 | 0.375690  | 6.246245  | H                         | -1.365732 | 0.375690  | 6.246245  |
| H                       | 1.352148  | 4.429442  | 5.943833  | H                         | 1.352148  | 4.429442  | 5.943833  |
| H                       | -1.970476 | 0.755404  | -3.992453 | H                         | -1.970476 | 0.755404  | -3.992453 |
| C                       | -0.677945 | -0.298295 | 5.711491  | C                         | -0.677945 | -0.298295 | 5.711491  |
| H                       | -0.423663 | 1.912372  | -5.575728 | H                         | -0.423663 | 1.912372  | -5.575728 |
| H                       | 1.162885  | 6.205360  | 4.179324  | H                         | 1.162885  | 6.205360  | 4.179324  |
| H                       | 0.251741  | -1.447597 | -2.921506 | H                         | 0.251741  | -1.447597 | -2.921506 |
| C                       | 0.796922  | 4.227470  | 5.013915  | C                         | 0.796922  | 4.227470  | 5.013915  |
| C                       | 1.066884  | -2.048894 | 4.368322  | C                         | 1.066884  | -2.048894 | 4.368322  |
| H                       | 1.743289  | -2.738171 | 3.838565  | H                         | 1.743289  | -2.738171 | 3.838565  |
| H                       | -0.122361 | 1.130624  | 0.900991  | H                         | -0.122361 | 1.130624  | 0.900991  |
| C                       | 0.692285  | 5.221334  | 4.024325  | C                         | 0.692285  | 5.221334  | 4.024325  |
| H                       | 0.295443  | 2.194789  | 5.595416  | H                         | 0.295443  | 2.194789  | 5.595416  |
| C                       | -0.988215 | 1.105577  | -3.638910 | C                         | -0.988215 | 1.105577  | -3.638910 |
| C                       | 0.198822  | 2.970317  | 4.819326  | C                         | 0.198822  | 2.970317  | 4.819326  |
| C                       | -0.115908 | 1.755161  | -4.529636 | C                         | -0.115908 | 1.755161  | -4.529636 |
| C                       | -0.487616 | -0.166293 | 4.317275  | C                         | -0.487616 | -0.166293 | 4.317275  |
| C                       | -0.005028 | 4.952823  | 2.832571  | C                         | -0.005028 | 4.952823  | 2.832571  |
| C                       | 0.385381  | -1.053440 | 3.648631  | C                         | 0.385381  | -1.053440 | 3.648631  |
| C                       | -0.247765 | -2.189483 | -2.278967 | C                         | -0.247765 | -2.189483 | -2.278967 |
| H                       | -0.081493 | 5.724552  | 2.050158  | H                         | -0.081493 | 5.724552  | 2.050158  |
| H                       | 0.837888  | -3.871294 | -3.127865 | H                         | 0.837888  | -3.871294 | -3.127865 |
| P                       | -1.695617 | -0.009214 | -1.113340 | P                         | -1.695617 | -0.009214 | -1.113340 |
| C                       | -0.502161 | 2.698091  | 3.625243  | C                         | -0.502161 | 2.698091  | 3.625243  |
| C                       | -0.608760 | 0.906284  | -2.292928 | C                         | -0.608760 | 0.906284  | -2.292928 |
| C                       | -0.594251 | 3.693939  | 2.627917  | C                         | -0.594251 | 3.693939  | 2.627917  |
| Pt                      | -1.604763 | 0.555840  | 1.107549  | Pt                        | -1.604763 | 0.555840  | 1.107549  |
| C                       | 0.079589  | -3.553241 | -2.394530 | C                         | 0.079589  | -3.553241 | -2.394530 |
| H                       | 0.505138  | -0.962164 | 2.556034  | H                         | 0.505138  | -0.962164 | 2.556034  |
| C                       | 1.141490  | 2.203641  | -4.088318 | C                         | 1.141490  | 2.203641  | -4.088318 |
| H                       | 1.822838  | 2.713599  | -4.788005 | H                         | 1.822838  | 2.713599  | -4.788005 |
| C                       | -1.213768 | -1.776569 | -1.338444 | C                         | -1.213768 | -1.776569 | -1.338444 |
| P                       | -1.369479 | 1.101082  | 3.320124  | P                         | -1.369479 | 1.101082  | 3.320124  |
| H                       | -1.115973 | 3.461652  | 1.684203  | H                         | -1.115973 | 3.461652  | 1.684203  |
| C                       | 0.650854  | 1.366168  | -1.853047 | C                         | 0.650854  | 1.366168  | -1.853047 |
| C                       | 1.523114  | 2.005993  | -2.748741 | C                         | 1.523114  | 2.005993  | -2.748741 |
| C                       | -0.558543 | -4.504675 | -1.580427 | C                         | -0.558543 | -4.504675 | -1.580427 |
| C                       | -1.852822 | -2.732476 | -0.514746 | C                         | -1.852822 | -2.732476 | -0.514746 |
| H                       | 0.930739  | 1.228035  | -0.796011 | H                         | 0.930739  | 1.228035  | -0.796011 |
| H                       | 2.504112  | 2.360675  | -2.394463 | H                         | 2.504112  | 2.360675  | -2.394463 |
| H                       | -2.604495 | -2.391745 | 0.221196  | H                         | -2.604495 | -2.391745 | 0.221196  |
| C                       | -3.005831 | 1.359425  | 4.158667  | C                         | -3.005831 | 1.359425  | 4.158667  |
| C                       | -1.526558 | -4.091262 | -0.644832 | C                         | -1.526558 | -4.091262 | -0.644832 |
| S                       | -3.861449 | -0.340137 | 1.479870  | S                         | -3.861449 | -0.340137 | 1.479870  |
| H                       | -2.794706 | -1.538608 | 3.322758  | H                         | -2.794706 | -1.538608 | 3.322758  |
| C                       | -3.745541 | -0.973556 | 3.215065  | C                         | -3.745541 | -0.973556 | 3.215065  |
| H                       | -2.029272 | -4.834092 | -0.004869 | H                         | -2.029272 | -4.834092 | -0.004869 |
| H                       | -4.564708 | -1.712426 | 3.341941  | H                         | -4.564708 | -1.712426 | 3.341941  |
| H                       | -0.300240 | -5.571806 | -1.673541 | H                         | -0.300240 | -5.571806 | -1.673541 |
| C                       | -3.863898 | 0.087057  | 4.327055  | C                         | -3.863898 | 0.087057  | 4.327055  |
| H                       | -4.923599 | 0.411953  | 4.415266  | H                         | -4.923599 | 0.411953  | 4.415266  |
| H                       | -3.603442 | -0.404963 | 5.291733  | H                         | -3.603442 | -0.404963 | 5.291733  |
| H                       | -2.850963 | 1.879616  | 5.127582  | H                         | -2.850963 | 1.879616  | 5.127582  |
| H                       | -3.504379 | 2.078350  | 3.475044  | H                         | -3.504379 | 2.078350  | 3.475044  |

| <b>cis-11-boat</b> |           |           |           | <b>trans-11-boat</b> |           |           |           |
|--------------------|-----------|-----------|-----------|----------------------|-----------|-----------|-----------|
| H                  | 3.111409  | 0.416579  | -5.006209 | H                    | 2.970566  | -0.090967 | -5.263105 |
| H                  | 1.242436  | 1.875544  | -4.171278 | H                    | 0.902948  | 1.172051  | -4.595031 |
| C                  | 2.700765  | 0.264312  | -3.995367 | C                    | 2.615352  | -0.123153 | -4.220695 |
| C                  | 1.653935  | 1.081654  | -3.527978 | C                    | 1.458286  | 0.584297  | -3.846854 |
| H                  | 4.029289  | -1.398036 | -3.532871 | H                    | 4.215525  | -1.440502 | -3.549078 |
| C                  | 3.214539  | -0.750514 | -3.171234 | C                    | 3.312554  | -0.878667 | -3.261473 |
| H                  | 2.637308  | -0.043366 | 5.440111  | H                    | -7.128195 | 1.310188  | -2.202437 |
| C                  | 1.120895  | 0.881339  | -2.245742 | C                    | 0.997787  | 0.534743  | -2.521001 |
| H                  | 0.286680  | 1.505642  | -1.887087 | H                    | 0.078843  | 1.065692  | -2.224158 |
| H                  | 3.181397  | -2.495618 | 5.595106  | H                    | -6.096102 | 3.444818  | -3.027534 |
| C                  | 2.690319  | -0.948693 | -1.880102 | C                    | 2.860659  | -0.923410 | -1.931090 |
| C                  | 1.970197  | -0.791098 | 4.982750  | C                    | -6.166659 | 1.655110  | -1.789821 |
| C                  | 2.273913  | -2.159963 | 5.068844  | C                    | -5.588180 | 2.848291  | -2.253117 |
| C                  | 1.638731  | -0.133817 | -1.411817 | C                    | 1.698718  | -0.215096 | -1.552597 |
| H                  | 3.100032  | -1.745811 | -1.240494 | H                    | 3.412964  | -1.515633 | -1.184904 |
| H                  | 0.577743  | 0.710063  | 4.277127  | H                    | -5.981718 | -0.046621 | -0.449595 |
| H                  | -3.328040 | 3.921821  | 3.140758  | H                    | -3.981587 | -4.541117 | 1.113923  |
| H                  | 3.764971  | 0.724723  | 0.262427  | H                    | 3.170737  | 1.777639  | -0.833663 |
| C                  | 0.808529  | -0.363917 | 4.318570  | C                    | -5.522160 | 0.890373  | -0.799422 |
| H                  | 4.884664  | 2.614577  | 1.454734  | H                    | 4.343626  | 3.686100  | 0.280109  |
| H                  | -3.354769 | 3.924467  | 5.654392  | H                    | -6.277534 | -4.441270 | 2.126647  |
| H                  | 3.412287  | -0.966779 | 1.994832  | H                    | 3.738082  | -0.684060 | 1.593832  |
| C                  | -2.985905 | 3.036313  | 3.699633  | C                    | -4.443716 | -3.567519 | 1.341079  |
| C                  | 1.421263  | -3.098261 | 4.462078  | C                    | -4.350124 | 3.272677  | -1.733568 |
| H                  | 1.663635  | -4.171356 | 4.496219  | H                    | -3.883614 | 4.199941  | -2.102639 |
| H                  | -1.346093 | 0.047026  | -1.113436 | H                    | -1.328122 | 0.610218  | -0.864345 |
| C                  | -3.004584 | 3.035970  | 5.105003  | C                    | -5.727920 | -3.511436 | 1.909522  |
| H                  | -2.536719 | 1.892424  | 1.891747  | H                    | -2.720481 | -2.415378 | 0.647301  |
| C                  | 3.183276  | 1.361149  | 0.948700  | C                    | 2.962318  | 2.007992  | 0.222846  |
| C                  | -2.534129 | 1.905962  | 2.995187  | C                    | -3.737158 | -2.383466 | 1.069006  |
| C                  | 3.809146  | 2.431726  | 1.608356  | C                    | 3.622470  | 3.080058  | 0.851580  |
| C                  | -0.064613 | -1.300991 | 3.720953  | C                    | -4.286511 | 1.316111  | -0.271226 |
| C                  | -2.578296 | 1.894616  | 5.810155  | C                    | -6.310474 | -2.265189 | 2.205553  |
| C                  | 0.269814  | -2.672466 | 3.782210  | C                    | -3.697349 | 2.506198  | -0.756579 |
| C                  | 2.928106  | -1.892963 | 1.652369  | C                    | 3.180604  | -1.633148 | 1.550023  |
| H                  | -2.594445 | 1.886492  | 6.911788  | H                    | -7.315999 | -2.215727 | 2.652799  |
| H                  | 4.415439  | -3.170171 | 2.585706  | H                    | 4.733808  | -2.768599 | 2.561461  |
| P                  | 0.941394  | -0.286315 | 0.296805  | P                    | 1.119929  | -0.185755 | 0.200211  |
| C                  | -2.099081 | 0.761483  | 3.697538  | C                    | -4.315047 | -1.129976 | 1.364969  |
| C                  | 1.805353  | 1.113238  | 1.144239  | C                    | 2.034338  | 1.232562  | 0.947933  |
| C                  | -2.130918 | 0.762139  | 5.111038  | C                    | -5.607012 | -1.079512 | 1.936390  |
| Pt                 | -1.324116 | -0.291824 | 0.456008  | Pt                   | -1.131951 | 0.009839  | 0.602766  |
| C                  | 3.489872  | -3.137175 | 1.989604  | C                    | 3.736695  | -2.803565 | 2.094264  |
| H                  | -0.358922 | -3.423901 | 3.280682  | H                    | -2.706600 | 2.812768  | -0.380709 |
| C                  | 3.062378  | 3.277630  | 2.450078  | C                    | 3.365375  | 3.374914  | 2.201419  |
| H                  | 3.554836  | 4.119922  | 2.961789  | H                    | 3.884445  | 4.214652  | 2.690838  |
| C                  | 1.735252  | -1.838168 | 0.906206  | C                    | 1.901033  | -1.670857 | 0.956893  |
| P                  | -1.535417 | -0.733740 | 2.758272  | P                    | -3.341952 | 0.394374  | 1.016138  |
| H                  | -1.789695 | -0.124336 | 5.670507  | H                    | -6.075039 | -0.109975 | 2.172491  |
| C                  | 1.057646  | 1.984006  | 1.962438  | C                    | 1.770823  | 1.531723  | 2.304887  |
| C                  | 1.683912  | 3.058625  | 2.616708  | C                    | 2.442283  | 2.596138  | 2.925812  |
| C                  | 2.868410  | -4.330582 | 1.585779  | C                    | 3.019439  | -4.012625 | 2.050479  |
| C                  | 1.095568  | -3.041024 | 0.525831  | C                    | 1.179469  | -2.883698 | 0.923077  |
| H                  | -0.025006 | 1.821644  | 2.074250  | H                    | 1.036533  | 0.916515  | 2.857380  |
| H                  | 3.314606  | -5.302602 | 1.849933  | H                    | 3.454900  | -4.927264 | 2.483633  |
| H                  | 1.085089  | 3.728584  | 3.253984  | H                    | 2.238604  | 2.823288  | 3.984656  |
| H                  | 0.143930  | -2.989549 | -0.030109 | H                    | 0.165919  | -2.898490 | 0.491089  |
| C                  | -2.854803 | -1.994094 | 3.183142  | C                    | -3.553664 | 1.462973  | 2.534570  |
| C                  | 1.664142  | -4.280131 | 0.859045  | C                    | 1.740844  | -4.050411 | 1.465719  |
| S                  | -3.653689 | -0.136125 | 0.112272  | S                    | -0.869683 | -0.996191 | 2.828861  |
| H                  | -5.573396 | -0.971467 | 1.232710  | H                    | -1.784355 | -0.369425 | 4.947217  |
| C                  | -4.534072 | -0.816404 | 1.590214  | C                    | -2.178715 | -0.262992 | 3.915311  |
| H                  | 1.162698  | -5.211703 | 0.551838  | H                    | 1.169559  | -4.991821 | 1.444859  |
| H                  | -4.586839 | -0.057496 | 2.404227  | H                    | -3.107681 | -0.876018 | 3.865610  |
| C                  | -3.964390 | -2.143742 | 2.127803  | C                    | -2.504440 | 1.217993  | 3.636602  |
| H                  | -2.347799 | -2.966558 | 3.343943  | H                    | -3.507307 | 2.510194  | 2.170602  |
| H                  | -3.275230 | -1.685152 | 4.164307  | H                    | -4.584978 | 1.300333  | 2.914597  |
| H                  | -3.590230 | -2.737078 | 1.265584  | H                    | -1.560410 | 1.741528  | 3.372293  |
| H                  | -4.782159 | -2.737819 | 2.595022  | H                    | -2.886731 | 1.694908  | 4.567539  |

| TS[ <i>trans</i> -11-boat→skew-boat] |           |           |           | TS[ <i>trans</i> -11-skew-boat→chair] |           |           |           |
|--------------------------------------|-----------|-----------|-----------|---------------------------------------|-----------|-----------|-----------|
| H                                    | 2.939806  | -3.924181 | -3.946096 | H                                     | 2.012440  | -1.170980 | -5.531297 |
| H                                    | 0.462798  | -3.754945 | -3.561328 | H                                     | -0.166145 | -1.830115 | -4.465301 |
| C                                    | 2.548329  | -3.295264 | -3.130537 | C                                     | 1.833322  | -0.962881 | -4.464319 |
| C                                    | 1.162379  | -3.200090 | -2.916146 | C                                     | 0.613852  | -1.331675 | -3.867882 |
| H                                    | 4.523753  | -2.667677 | -2.455197 | H                                     | 3.774950  | -0.023056 | -4.158498 |
| C                                    | 3.436348  | -2.591594 | -2.295685 | C                                     | 2.820380  | -0.320651 | -3.695937 |
| H                                    | -6.311180 | 3.846231  | -0.378262 | H                                     | -4.360386 | 2.697283  | -2.952915 |
| C                                    | 0.660993  | -2.402103 | -1.872858 | C                                     | 0.380021  | -1.055930 | -2.510549 |
| H                                    | -0.423178 | -2.324007 | -1.689895 | H                                     | -0.581405 | -1.318801 | -2.040074 |
| H                                    | -4.331686 | 5.189259  | -1.139192 | H                                     | -6.035505 | 4.310980  | -2.000750 |
| C                                    | 2.940221  | -1.794230 | -1.251814 | C                                     | 2.595045  | -0.053272 | -2.334422 |
| C                                    | -5.300211 | 3.410107  | -0.338919 | C                                     | -4.573699 | 2.699414  | -1.872188 |
| C                                    | -4.189255 | 4.161997  | -0.767076 | C                                     | -5.510209 | 3.604008  | -1.339028 |
| C                                    | 1.546457  | -1.690181 | -1.038349 | C                                     | 1.371068  | -0.419955 | -1.732577 |
| H                                    | 3.640118  | -1.252971 | -0.595651 | H                                     | 3.374165  | 0.448111  | -1.739523 |
| H                                    | -5.999879 | 1.517254  | 0.465834  | H                                     | -3.141252 | 1.112317  | -1.435421 |
| H                                    | -6.174104 | -1.423502 | -3.291359 | H                                     | -3.936918 | -4.357486 | 1.469868  |
| H                                    | 1.752607  | 0.582253  | -2.344317 | H                                     | 3.933028  | -0.146741 | 0.963561  |
| C                                    | -5.123290 | 2.101725  | 0.140675  | C                                     | -3.895904 | 1.804679  | -1.029208 |
| H                                    | 1.840883  | 2.953430  | -3.138738 | H                                     | 5.482769  | 1.732885  | 1.547514  |
| H                                    | -6.518089 | -3.795282 | -2.541790 | H                                     | -6.444973 | -4.224803 | 1.474070  |
| H                                    | 3.380602  | 0.893491  | 1.111638  | H                                     | 1.330114  | -0.878427 | 2.836849  |
| C                                    | -5.780699 | -1.758265 | -2.318196 | C                                     | -4.438964 | -3.377269 | 1.443608  |
| C                                    | -2.901640 | 3.600158  | -0.718649 | C                                     | -5.766612 | 3.609814  | 0.042686  |
| H                                    | -2.022482 | 4.177095  | -1.047223 | H                                     | -6.492442 | 4.321183  | 0.467894  |
| H                                    | -1.626102 | -1.149610 | -0.675156 | H                                     | -1.668423 | -0.393976 | -0.605546 |
| C                                    | -5.972782 | -3.085816 | -1.899375 | C                                     | -5.843222 | -3.302331 | 1.445995  |
| H                                    | -4.933511 | 0.187921  | -1.839714 | H                                     | -2.567336 | -2.245285 | 1.374800  |
| C                                    | 1.511513  | 1.402909  | -1.650697 | C                                     | 3.577440  | 0.895089  | 0.920074  |
| C                                    | -5.085265 | -0.848605 | -1.500818 | C                                     | -3.669784 | -2.201400 | 1.397917  |
| C                                    | 1.559287  | 2.737407  | -2.095755 | C                                     | 4.444381  | 1.950978  | 1.250880  |
| C                                    | -3.829751 | 1.532814  | 0.190792  | C                                     | -4.158435 | 1.796483  | 0.359774  |
| C                                    | -5.458504 | -3.508154 | -0.658905 | C                                     | -6.480659 | -2.048245 | 1.404751  |
| C                                    | -2.721510 | 2.289359  | -0.245545 | C                                     | -5.095917 | 2.710081  | 0.890456  |
| C                                    | 3.228925  | 0.054416  | 1.809137  | C                                     | 1.724730  | -1.743356 | 2.271305  |
| H                                    | -5.594748 | -4.550448 | -0.329216 | H                                     | -7.580715 | -1.987591 | 1.397787  |
| H                                    | 5.007963  | 0.505161  | 2.974054  | H                                     | 2.198681  | -2.928525 | 4.025866  |
| P                                    | 0.889130  | -0.602734 | 0.299162  | P                                     | 1.063382  | -0.157595 | 0.069758  |
| C                                    | -4.578560 | -1.265110 | -0.253042 | C                                     | -4.306467 | -0.941864 | 1.365396  |
| C                                    | 1.141535  | 1.118587  | -0.321017 | C                                     | 2.244919  | 1.169123  | 0.546954  |
| C                                    | -4.759223 | -2.605571 | 0.157192  | C                                     | -5.716149 | -0.870171 | 1.367686  |
| Pt                                   | -1.340271 | -0.675688 | 0.831601  | Pt                                    | -1.091709 | 0.227281  | 0.758251  |
| C                                    | 4.139745  | -0.162920 | 2.857252  | C                                     | 2.207473  | -2.887244 | 2.924834  |
| H                                    | -1.715715 | 1.840580  | -0.200616 | H                                     | -5.307172 | 2.733633  | 1.970208  |
| C                                    | 1.247664  | 3.788808  | -1.216831 | C                                     | 3.985439  | 3.279717  | 1.212372  |
| H                                    | 1.283840  | 4.832021  | -1.569599 | H                                     | 4.664953  | 4.104929  | 1.478965  |
| C                                    | 2.112433  | -0.795368 | 1.658339  | C                                     | 1.740252  | -1.682609 | 0.858321  |
| P                                    | -3.563225 | -0.175430 | 0.832132  | P                                     | -3.259098 | 0.574188  | 1.401881  |
| H                                    | -4.331740 | -2.949835 | 1.113790  | H                                     | -6.218426 | 0.110427  | 1.325965  |
| C                                    | 0.825036  | 2.177267  | 0.563946  | C                                     | 1.784259  | 2.502973  | 0.516609  |
| C                                    | 0.886838  | 3.505126  | 0.115287  | C                                     | 2.654798  | 3.553542  | 0.846665  |
| C                                    | 3.939762  | -1.225462 | 3.756834  | C                                     | 2.695449  | -3.978923 | 2.180522  |
| C                                    | 1.906268  | -1.852493 | 2.571378  | C                                     | 2.234319  | -2.772040 | 0.112108  |
| H                                    | 0.497746  | 1.943742  | 1.592807  | H                                     | 0.731663  | 2.707064  | 0.258996  |
| H                                    | 4.652612  | -1.390883 | 4.580456  | H                                     | 3.067583  | -4.878152 | 2.697239  |
| H                                    | 0.635926  | 4.324199  | 0.807967  | H                                     | 2.287178  | 4.591632  | 0.831816  |
| H                                    | 1.010391  | -2.485930 | 2.474493  | H                                     | 2.250973  | -2.728227 | -0.988085 |
| C                                    | -4.484950 | -0.210014 | 2.467687  | C                                     | -3.447724 | 1.166106  | 3.145144  |
| H                                    | -4.909388 | 0.805855  | 2.616783  | C                                     | 2.707104  | -3.919097 | 0.776551  |
| C                                    | 2.822858  | -2.067907 | 3.612827  | S                                     | -0.295105 | 1.168610  | 2.886914  |
| S                                    | -0.858928 | -0.076137 | 3.126757  | H                                     | -0.797974 | 0.403500  | 5.094860  |
| H                                    | -2.739130 | 1.388198  | 3.743377  | C                                     | -1.213581 | 0.118196  | 4.106087  |
| H                                    | -5.341528 | -0.903987 | 2.341229  | H                                     | 3.089428  | -4.769420 | 0.189438  |
| C                                    | -2.448730 | 0.337121  | 3.970218  | H                                     | -0.915021 | -0.937027 | 3.934776  |
| H                                    | 2.653868  | -2.889656 | 4.326400  | C                                     | -2.773486 | 0.219314  | 4.154201  |
| H                                    | -2.204310 | 0.303342  | 5.052567  | H                                     | -2.987056 | 2.175928  | 3.179590  |
| C                                    | -3.633318 | -0.606024 | 3.684062  | H                                     | -4.531255 | 1.250519  | 3.373848  |
| H                                    | -3.250312 | -1.644075 | 3.568604  | H                                     | -3.081256 | 0.555953  | 5.167582  |
| H                                    | -4.313814 | -0.613830 | 4.565957  | H                                     | -3.210738 | -0.796412 | 4.032703  |

## B3LYP-D3/SVP(PCM):

| <i>cis-5</i> |           |           |           | <i>trans-5</i> |           |           |           |
|--------------|-----------|-----------|-----------|----------------|-----------|-----------|-----------|
| H            | -4.731357 | 3.154958  | -4.587317 | H              | -8.224044 | -2.669800 | 2.462386  |
| H            | -3.133590 | 1.238465  | -4.470120 | H              | -6.727319 | -2.639074 | 0.462633  |
| C            | -4.636514 | 2.575311  | -3.665820 | C              | -7.195936 | -2.309871 | 2.551379  |
| C            | -3.740314 | 1.501487  | -3.600001 | C              | -6.357369 | -2.291973 | 1.430688  |
| H            | -6.109988 | 3.738369  | -2.590510 | H              | -7.360274 | -1.869316 | 4.663481  |
| C            | -5.408187 | 2.901699  | -2.547745 | C              | -6.712802 | -1.861607 | 3.783069  |
| H            | -6.155127 | -3.559345 | -2.442950 | H              | -2.189996 | -5.749288 | 3.556523  |
| C            | -3.617390 | 0.761621  | -2.421766 | C              | -5.047191 | -1.821585 | 1.541341  |
| H            | -5.733323 | -1.187636 | -1.893436 | H              | -3.538711 | -3.683070 | 3.393449  |
| H            | -2.913443 | -0.074432 | -2.384505 | H              | -4.406570 | -1.793501 | 0.657441  |
| C            | -5.501708 | -3.308662 | -1.603498 | C              | -1.692998 | -4.794860 | 3.365245  |
| C            | -5.291820 | 2.157856  | -1.367038 | C              | -5.396110 | -1.400161 | 3.898603  |
| C            | -5.264334 | -1.966884 | -1.289182 | C              | -2.455690 | -3.625222 | 3.271727  |
| H            | -5.090129 | -5.372321 | -1.097803 | H              | 0.289257  | -5.658383 | 3.285375  |
| C            | -4.398082 | 1.077435  | -1.292578 | C              | -4.549978 | -1.372735 | 2.777793  |
| C            | -4.905141 | -4.324170 | -0.849540 | C              | -0.304420 | -4.743420 | 3.214200  |
| H            | -5.905420 | 2.423297  | -0.504093 | H              | -5.034358 | -1.060326 | 4.870275  |
| H            | -0.930100 | 1.538177  | -1.048926 | H              | -0.870422 | 1.057589  | -1.059716 |
| H            | -2.061709 | 2.637956  | -0.647006 | H              | -2.063026 | 2.155746  | -0.897770 |
| C            | -4.424075 | -1.623986 | -0.214329 | C              | -1.833676 | -2.390679 | 3.020956  |
| N            | -1.312097 | 2.063546  | -0.257611 | N              | -1.284575 | 1.721419  | -0.398481 |
| C            | -4.065701 | -3.992551 | 0.218656  | C              | 0.321720  | -3.516150 | 2.968643  |
| P            | -4.114737 | 0.133778  | 0.272312  | P              | -2.788922 | -0.811034 | 2.897181  |
| C            | -3.822346 | -2.652067 | 0.532179  | C              | -0.435658 | -2.346310 | 2.867281  |
| H            | -3.590194 | -4.780139 | 0.808499  | H              | 1.407162  | -3.468403 | 2.849037  |
| C            | -0.255347 | 2.925210  | 0.327534  | C              | -0.278040 | 2.749905  | -0.020078 |
| H            | 1.344475  | 1.470468  | 0.345981  | H              | 1.365500  | 1.406342  | 0.385489  |
| H            | -7.028901 | -0.635600 | 0.293475  | H              | -1.954216 | -1.834620 | 5.603568  |
| C            | -5.557564 | 0.572933  | 1.341558  | C              | -2.683622 | -0.064808 | 4.582015  |
| Pt           | -2.075438 | 0.577916  | 1.223363  | Pt             | -2.023772 | 0.541181  | 1.251706  |
| C            | -6.847958 | 0.064468  | 1.111446  | C              | -2.257141 | -0.790740 | 5.705485  |
| H            | -3.153647 | -2.398168 | 1.357023  | H              | 0.054793  | -1.389032 | 2.668361  |
| H            | -0.744325 | 3.619667  | 1.027336  | H              | -0.816375 | 3.568217  | 0.480932  |
| C            | 0.772266  | 2.082605  | 1.063933  | C              | 0.758291  | 2.157838  | 0.919397  |
| H            | -4.347814 | 1.839738  | 2.604568  | H              | -3.375704 | 1.859757  | 3.866294  |
| C            | -5.354688 | 1.459940  | 2.412000  | C              | -3.062755 | 1.280355  | 4.738753  |
| H            | 1.491152  | 2.740174  | 1.576397  | H              | 1.445025  | 2.953095  | 1.248433  |
| C            | -7.913150 | 0.443571  | 1.932929  | C              | -2.214180 | -0.181742 | 6.964742  |
| H            | -8.910923 | 0.038750  | 1.745824  | H              | -1.874953 | -0.755388 | 7.830929  |
| H            | -2.468171 | -0.453186 | 2.338980  | H              | -3.278938 | 0.117006  | 0.369029  |
| S            | -0.017396 | 0.982123  | 2.326762  | S              | -0.030866 | 1.400869  | 2.407053  |
| C            | -6.422941 | 1.840949  | 3.230762  | C              | -3.027781 | 1.882748  | 5.998472  |
| C            | -7.703565 | 1.333549  | 2.992529  | C              | -2.601461 | 1.153015  | 7.114117  |
| H            | -6.250165 | 2.530419  | 4.060890  | H              | -3.325105 | 2.928699  | 6.107409  |
| H            | -8.538040 | 1.626020  | 3.634940  | H              | -2.566184 | 1.627052  | 8.098282  |
| H            | 0.232930  | 3.524039  | -0.462632 | H              | 0.197956  | 3.157393  | -0.929950 |

| <i>cis-6</i> |           |           |           | <i>trans-6</i> |           |           |           |
|--------------|-----------|-----------|-----------|----------------|-----------|-----------|-----------|
| H            | -4.709492 | 3.375213  | -4.385626 | H              | -8.214689 | -2.718830 | 2.242269  |
| H            | -3.014465 | 1.544064  | -4.273883 | H              | -6.682710 | -2.437000 | 0.289398  |
| C            | -4.628407 | 2.756930  | -3.488272 | C              | -7.198416 | -2.345320 | 2.391005  |
| C            | -3.677904 | 1.730638  | -3.425820 | C              | -6.340236 | -2.186655 | 1.296595  |
| H            | -6.215581 | 3.786087  | -2.438707 | H              | -7.413586 | -2.137950 | 4.534076  |
| C            | -5.471105 | 2.987043  | -2.398008 | C              | -6.750398 | -2.019910 | 3.673490  |
| H            | -6.023892 | -3.444493 | -2.612322 | H              | -2.062660 | -5.730944 | 3.042401  |
| C            | -3.571880 | 0.942089  | -2.278235 | C              | -5.045667 | -1.698043 | 1.484434  |
| H            | -5.677414 | -1.094836 | -1.930222 | H              | -3.492497 | -3.712753 | 3.087995  |
| H            | -2.824351 | 0.144558  | -2.242965 | H              | -4.390258 | -1.559237 | 0.622136  |
| C            | -5.406500 | -3.222544 | -1.738251 | C              | -1.600759 | -4.741670 | 2.992791  |
| C            | -5.371315 | 2.194370  | -1.247853 | C              | -5.449199 | -1.540625 | 3.865619  |
| C            | -5.211616 | -1.893522 | -1.349346 | C              | -2.409294 | -3.599507 | 3.017388  |
| H            | -4.964462 | -5.299698 | -1.321485 | H              | 0.418074  | -5.511682 | 2.884301  |
| C            | -4.422940 | 1.161555  | -1.177341 | C              | -4.583827 | -1.371970 | 2.772113  |
| H            | 2.490894  | 5.131802  | -1.360364 | H              | 2.524555  | 4.877649  | -1.750355 |
| O            | 0.225982  | 3.695464  | -1.618899 | O              | 0.342100  | 3.296542  | -1.795371 |
| C            | -4.813211 | -4.261715 | -1.014619 | C              | -0.211359 | -4.618382 | 2.905172  |
| H            | -6.040359 | 2.384334  | -0.406489 | H              | -5.115028 | -1.297477 | 4.875378  |
| H            | -1.096152 | 1.820970  | -0.841457 | H              | -0.953373 | 1.626440  | -0.727365 |
| H            | -2.212012 | 2.839753  | -0.252568 | H              | -2.170095 | 2.648166  | -0.392447 |
| C            | 1.773858  | 5.719660  | -0.769378 | C              | 1.742852  | 5.548618  | -1.366045 |
| C            | -4.417744 | -1.587578 | -0.229080 | C              | -1.831802 | -2.321013 | 2.949352  |
| C            | 0.313102  | 3.894878  | -0.427980 | C              | 0.333664  | 3.779965  | -0.685041 |
| H            | 2.302850  | 6.438926  | -0.134000 | H              | 2.194069  | 6.427210  | -0.891390 |
| N            | -1.444068 | 2.228668  | 0.032508  | N              | -1.376461 | 2.166684  | 0.035653  |
| C            | -4.019928 | -3.966550 | 0.098593  | C              | 0.370403  | -3.346902 | 2.841563  |
| P            | -4.166620 | 0.150998  | 0.349095  | P              | -2.844749 | -0.775076 | 2.988758  |
| O            | 1.038652  | 4.868370  | 0.121926  | O              | 0.976974  | 4.894753  | -0.342962 |
| C            | -3.819047 | -2.638782 | 0.487015  | C              | -0.432328 | -2.203599 | 2.858494  |
| H            | -3.546939 | -4.772421 | 0.665285  | H              | 1.456313  | -3.243452 | 2.772625  |
| C            | -0.364479 | 3.033298  | 0.637247  | C              | -0.383944 | 3.157540  | 0.511397  |
| H            | 1.209566  | 1.545618  | 0.560217  | H              | 1.242231  | 1.782531  | 0.906763  |
| H            | -7.044903 | -0.742081 | 0.302625  | H              | -2.052300 | -2.090750 | 5.575793  |
| C            | -5.645504 | 0.509001  | 1.397782  | C              | -2.784901 | -0.223114 | 4.748400  |
| Pt           | -2.163146 | 0.594505  | 1.374127  | Pt             | -2.098396 | 0.776686  | 1.523160  |
| C            | -6.908555 | -0.049924 | 1.135818  | C              | -2.372704 | -1.069410 | 5.790338  |
| H            | -3.185162 | -2.413308 | 1.346699  | H              | 0.023001  | -1.210710 | 2.802516  |
| H            | -0.808543 | 3.695877  | 1.395147  | H              | -0.919398 | 3.949240  | 1.055924  |
| C            | 0.664537  | 2.125865  | 1.323792  | C              | 0.619210  | 2.499560  | 1.468190  |
| H            | -4.513963 | 1.805169  | 2.705252  | H              | -3.493123 | 1.760952  | 4.243643  |
| C            | -5.499348 | 1.385016  | 2.486726  | C              | -3.187889 | 1.089706  | 5.050092  |
| H            | 1.399115  | 2.747909  | 1.854616  | H              | 1.288004  | 3.274621  | 1.869159  |
| C            | -8.003042 | 0.268369  | 1.944749  | C              | -2.366858 | -0.609844 | 7.111917  |
| H            | -8.978949 | -0.175692 | 1.733055  | H              | -2.038962 | -1.275724 | 7.914074  |
| H            | -2.535884 | -0.537809 | 2.391114  | H              | -3.267501 | 0.347596  | 0.532801  |
| S            | -0.132540 | 0.983152  | 2.533906  | S              | -0.236600 | 1.657926  | 2.863017  |
| C            | -6.596985 | 1.705432  | 3.292156  | C              | -3.189260 | 1.542782  | 6.371523  |
| C            | -7.850276 | 1.147546  | 3.022674  | C              | -2.776852 | 0.694146  | 7.405008  |
| H            | -6.468536 | 2.386948  | 4.136745  | H              | -3.504814 | 2.565253  | 6.593395  |
| H            | -8.707307 | 1.392344  | 3.655219  | H              | -2.770442 | 1.051476  | 8.437864  |
| H            | 1.089760  | 6.244063  | -1.452092 | H              | 1.091347  | 5.855497  | -2.196924 |

| <i>cis-7</i> |           |           |           | <i>trans-7</i> |           |           |           |
|--------------|-----------|-----------|-----------|----------------|-----------|-----------|-----------|
| H            | -4.720908 | 3.542505  | -4.234521 | H              | -8.194197 | -2.671597 | 2.127901  |
| H            | -3.001026 | 1.732459  | -4.167012 | H              | -6.601597 | -2.375272 | 0.226199  |
| C            | -4.640936 | 2.894303  | -3.358428 | C              | -7.180574 | -2.306979 | 2.312479  |
| C            | -3.676506 | 1.879887  | -3.320750 | C              | -6.288254 | -2.140190 | 1.246487  |
| H            | -6.254829 | 3.863319  | -2.292372 | H              | -7.459906 | -2.126160 | 4.450276  |
| C            | -5.499200 | 3.074053  | -2.270803 | C              | -6.769879 | -2.001551 | 3.611999  |
| H            | -5.957961 | -3.354487 | -2.713592 | H              | -2.084170 | -5.729959 | 3.029816  |
| C            | -3.571934 | 1.053147  | -2.200177 | C              | -4.997100 | -1.663422 | 1.480157  |
| H            | -5.661202 | -1.026030 | -1.941590 | H              | -3.493020 | -3.701540 | 3.161760  |
| H            | -2.813730 | 0.265096  | -2.184042 | H              | -4.314988 | -1.518562 | 0.639560  |
| C            | -5.350231 | -3.153800 | -1.827690 | C              | -1.618009 | -4.744027 | 2.958355  |
| C            | -5.400779 | 2.243078  | -1.147938 | C              | -5.471372 | -1.534523 | 3.850258  |
| C            | -5.183323 | -1.836890 | -1.388004 | C              | -2.414389 | -3.596037 | 3.032315  |
| H            | -4.870418 | -5.236305 | -1.486230 | H              | 0.385647  | -5.528911 | 2.733071  |
| C            | -4.438129 | 1.222116  | -1.102272 | C              | -4.572813 | -1.358061 | 2.785946  |
| H            | 2.137077  | 5.256046  | -1.350987 | H              | 2.122563  | 5.142620  | -1.694377 |
| O            | 0.206145  | 3.778255  | -1.429161 | O              | 0.225449  | 3.625904  | -1.517608 |
| C            | -4.741270 | -4.207931 | -1.139497 | C              | -0.234512 | -4.630888 | 2.792995  |
| H            | -6.081928 | 2.393854  | -0.308371 | H              | -5.165931 | -1.307517 | 4.872840  |
| H            | -1.100789 | 1.871342  | -0.714729 | H              | -1.049953 | 1.897596  | -0.534232 |
| H            | -2.234392 | 2.870243  | -0.126410 | H              | -2.223854 | 2.908584  | -0.049433 |
| H            | 1.560597  | 7.714336  | -1.465796 | H              | 1.478568  | 7.515398  | -2.276688 |
| H            | 0.094235  | 6.704583  | -1.544307 | H              | 0.042338  | 6.464914  | -2.178811 |
| C            | 1.763611  | 5.811787  | -0.479373 | C              | 1.718947  | 5.840314  | -0.947153 |
| C            | -4.402196 | -1.558248 | -0.251719 | C              | -1.831552 | -2.320784 | 2.938347  |
| C            | 0.283605  | 3.950957  | -0.232721 | C              | 0.285804  | 4.017046  | -0.372261 |
| H            | 2.614755  | 6.112789  | 0.146476  | H              | 2.550471  | 6.279549  | -0.379464 |
| N            | -1.467593 | 2.258747  | 0.160715  | N              | -1.421880 | 2.375908  | 0.294025  |
| C            | 0.931665  | 7.009794  | -0.899112 | C              | 0.860289  | 6.911553  | -1.593929 |
| C            | -3.960852 | -3.939837 | -0.010476 | C              | 0.352329  | -3.363935 | 2.701570  |
| P            | -4.185075 | 0.162038  | 0.390971  | P              | -2.836814 | -0.773134 | 3.053075  |
| O            | 1.001919  | 4.906431  | 0.356608  | O              | 0.970115  | 5.083746  | 0.036330  |
| C            | -3.788069 | -2.624006 | 0.428878  | C              | -0.438941 | -2.213995 | 2.769321  |
| H            | -3.475957 | -4.757332 | 0.528840  | H              | 1.433353  | -3.268338 | 2.571487  |
| C            | -0.404795 | 3.058371  | 0.801046  | C              | -0.383128 | 3.301679  | 0.801447  |
| H            | 1.181346  | 1.584197  | 0.718899  | H              | 1.233698  | 1.872402  | 0.973824  |
| H            | -7.042604 | -0.791757 | 0.292487  | H              | -2.072243 | -2.219444 | 5.581080  |
| H            | 0.529480  | 7.537881  | -0.020853 | H              | 0.429503  | 7.583147  | -0.835445 |
| C            | -5.682237 | 0.462455  | 1.432046  | C              | -2.794520 | -0.312354 | 4.839187  |
| Pt           | -2.200575 | 0.595008  | 1.457017  | Pt             | -2.099963 | 0.873273  | 1.686596  |
| C            | -6.929970 | -0.117152 | 1.143365  | C              | -2.393970 | -1.209438 | 5.842215  |
| H            | -3.164382 | -2.418647 | 1.301006  | H              | 0.020957  | -1.224563 | 2.694478  |
| H            | -0.867104 | 3.700769  | 1.565480  | H              | -0.870296 | 4.049910  | 1.443994  |
| C            | 0.618796  | 2.143586  | 1.485343  | C              | 0.655986  | 2.540542  | 1.635228  |
| H            | -4.593245 | 1.751492  | 2.782811  | H              | -3.493855 | 1.695935  | 4.425175  |
| C            | -5.566586 | 1.315114  | 2.543111  | C              | -3.198367 | 0.985155  | 5.201081  |
| H            | 1.339248  | 2.758895  | 2.042521  | H              | 1.360514  | 3.263937  | 2.069904  |
| C            | -8.039404 | 0.157509  | 1.948028  | C              | -2.401300 | -0.815316 | 7.184877  |
| H            | -9.002977 | -0.302729 | 1.715406  | H              | -2.082312 | -1.520331 | 7.956592  |
| H            | -2.584241 | -0.560385 | 2.444141  | H              | -3.334676 | 0.570319  | 0.731480  |
| S            | -0.190229 | 0.968388  | 2.656101  | S              | -0.136687 | 1.579529  | 2.989694  |
| C            | -6.679180 | 1.592135  | 3.344006  | C              | -3.213207 | 1.372641  | 6.543062  |
| C            | -7.917092 | 1.013586  | 3.048087  | C              | -2.812915 | 0.473218  | 7.537721  |
| H            | -6.574371 | 2.255784  | 4.205912  | H              | -3.529870 | 2.383493  | 6.811722  |
| H            | -8.785610 | 1.224175  | 3.677269  | H              | -2.817076 | 0.779150  | 8.586961  |



| <i>cis</i> -8 |           |           |           | <i>trans</i> -8 |           |           |           |
|---------------|-----------|-----------|-----------|-----------------|-----------|-----------|-----------|
| H             | -6.392651 | -1.598262 | -4.536490 | H               | 2.406349  | -2.175860 | -5.274568 |
| H             | -5.826862 | 0.593480  | -3.478655 | H               | 0.576654  | -0.501410 | -4.976539 |
| C             | -5.428396 | -1.460370 | -4.041004 | C               | 2.154662  | -1.809497 | -4.276118 |
| C             | -5.111653 | -0.232051 | -3.448605 | C               | 1.128860  | -0.871619 | -4.109087 |
| H             | -4.744201 | -3.470529 | -4.455623 | H               | 3.652093  | -3.012217 | -3.279823 |
| C             | -4.505944 | -2.508417 | -3.995129 | C               | 2.851622  | -2.277878 | -3.159743 |
| H             | -7.386691 | 2.943419  | -0.730690 | H               | -7.344953 | 3.169558  | 0.195671  |
| C             | -3.881945 | -0.056771 | -2.811119 | C               | 0.799015  | -0.412137 | -2.832388 |
| H             | -3.651351 | 0.905942  | -2.349088 | H               | -0.016104 | 0.304419  | -2.710142 |
| H             | -5.933994 | 4.957601  | -0.981012 | H               | -5.907380 | 5.076283  | -0.529747 |
| C             | -3.268826 | -2.332980 | -3.363187 | C               | 2.530835  | -1.809387 | -1.879934 |
| C             | -6.329600 | 2.895155  | -0.456966 | C               | -6.260678 | 3.046673  | 0.135030  |
| C             | -5.516011 | 4.023052  | -0.598532 | C               | -5.453833 | 4.115802  | -0.272225 |
| C             | -2.944973 | -1.105268 | -2.764271 | C               | 1.499616  | -0.872726 | -1.703212 |
| H             | -2.558411 | -3.160929 | -3.341443 | H               | 3.090386  | -2.181102 | -1.020062 |
| H             | -6.450072 | 0.827027  | 0.128346  | H               | -6.327656 | 0.989762  | 0.770700  |
| H             | -5.298322 | -4.346912 | -0.465933 | H               | -5.157590 | -2.733286 | -2.900084 |
| H             | -1.637739 | -0.037531 | -4.765511 | H               | 3.176825  | 1.114714  | -1.719904 |
| C             | -5.798489 | 1.696741  | 0.033430  | C               | -5.683740 | 1.817262  | 0.462217  |
| H             | -0.489305 | 1.629221  | -6.179837 | H               | 4.276672  | 3.325598  | -1.582133 |
| H             | -7.412519 | -4.243135 | 0.858478  | H               | -6.893121 | -3.921496 | -1.553521 |
| H             | 0.288878  | -1.865781 | -4.189719 | H               | 3.763298  | 0.027802  | 1.268921  |
| C             | -5.522565 | -3.468559 | 0.144145  | C               | -5.280786 | -2.504335 | -1.838648 |
| C             | -4.161242 | 3.945987  | -0.257641 | C               | -4.068433 | 3.950292  | -0.352846 |
| H             | -3.514080 | 4.818798  | -0.374916 | H               | -3.433649 | 4.780087  | -0.673528 |
| H             | 0.234240  | -0.349700 | 0.145402  | H               | -1.519193 | -0.309149 | -1.090017 |
| C             | -6.704999 | -3.410606 | 0.886213  | C               | -6.252777 | -3.170798 | -1.083729 |
| H             | -3.689938 | -2.460040 | -0.388587 | H               | -3.687205 | -1.049104 | -1.828024 |
| C             | -0.862641 | 0.591751  | -4.324212 | C               | 2.889470  | 1.806429  | -0.926049 |
| C             | -4.616491 | -2.403392 | 0.183036  | C               | -4.456455 | -1.551263 | -1.236937 |
| C             | -0.214926 | 1.536818  | -5.125960 | C               | 3.512743  | 3.056778  | -0.848182 |
| C             | -4.441693 | 1.611476  | 0.386530  | C               | -4.289993 | 1.643315  | 0.386395  |
| C             | -6.976798 | -2.285155 | 1.672320  | C               | -6.397397 | -2.876384 | 0.274426  |
| C             | -3.625778 | 2.747649  | 0.222117  | C               | -3.487754 | 2.719301  | -0.027464 |
| C             | 0.293641  | -2.610793 | -3.391892 | C               | 3.298857  | -0.906602 | 1.590093  |
| H             | -7.895558 | -2.236289 | 2.262100  | H               | -7.151769 | -3.394374 | 0.871794  |
| H             | 1.518100  | -3.984080 | -4.521253 | H               | 4.985350  | -1.472693 | 2.814775  |
| P             | -1.343517 | -0.811267 | -1.885612 | P               | 1.057621  | -0.198469 | -0.037042 |
| C             | -4.882890 | -1.264146 | 0.958475  | C               | -4.599661 | -1.242253 | 0.128075  |
| C             | -0.526392 | 0.456311  | -2.964693 | C               | 1.902603  | 1.446066  | 0.007140  |
| C             | -6.072698 | -1.220658 | 1.711637  | C               | -5.577894 | -1.916323 | 0.879165  |
| Pt            | -1.346684 | -0.216621 | 0.352541  | Pt              | -1.230158 | -0.081546 | 0.457930  |
| C             | 0.989734  | -3.809022 | -3.580703 | C               | 3.990248  | -1.755052 | 2.461935  |
| H             | -2.559174 | 2.686898  | 0.454402  | H               | -2.404993 | 2.586554  | -0.097406 |
| C             | 0.775387  | 2.360790  | -4.582421 | C               | 3.160978  | 3.956809  | 0.161936  |
| H             | 1.278146  | 3.101620  | -5.209245 | H               | 3.647910  | 4.933635  | 0.220057  |
| C             | -0.384706 | -2.364993 | -2.186182 | C               | 2.016970  | -1.252924 | 1.133749  |
| P             | -3.632902 | 0.086549  | 1.049982  | P               | -3.505686 | 0.041653  | 0.863484  |
| H             | -6.301669 | -0.357007 | 2.339763  | H               | -5.712920 | -1.703101 | 1.940804  |
| C             | 0.466632  | 1.293920  | -2.426749 | C               | 1.550309  | 2.358170  | 1.018915  |
| C             | 1.113986  | 2.236313  | -3.231471 | C               | 2.181040  | 3.602880  | 1.095969  |
| C             | 1.013138  | -4.776545 | -2.571061 | C               | 3.411700  | -2.956986 | 2.880344  |
| C             | -0.347730 | -3.339010 | -1.173088 | C               | 1.437261  | -2.458620 | 1.567387  |
| H             | 0.726195  | 1.211664  | -1.369887 | H               | 0.779785  | 2.087259  | 1.746528  |
| H             | 1.882174  | 2.880271  | -2.796034 | H               | 3.953318  | -3.617845 | 3.561857  |
| H             | -0.850927 | -3.147035 | -0.221533 | H               | 1.900087  | 4.301851  | 1.887980  |
| C             | -3.535459 | 0.390242  | 2.893431  | H               | 0.431031  | -2.726042 | 1.234290  |
| H             | -4.448567 | 0.903794  | 3.236286  | C               | -3.743949 | -0.063035 | 2.702833  |
| C             | 0.341918  | -4.539589 | -1.367167 | H               | -4.752196 | 0.287374  | 2.980415  |
| S             | -0.738640 | 0.444643  | 2.556668  | C               | 2.134079  | -3.308222 | 2.429914  |
| H             | -2.372738 | 2.222679  | 2.961981  | S               | -0.947025 | 0.245294  | 2.881233  |
| H             | -3.511828 | -0.610754 | 3.353598  | H               | -2.798589 | 1.818995  | 3.228526  |
| C             | -2.284735 | 1.169187  | 3.271588  | H               | -3.657447 | -1.127642 | 2.973243  |
| H             | 0.362495  | -5.286815 | -0.569972 | C               | -2.652008 | 0.740882  | 3.404973  |
| H             | -2.159384 | 1.164816  | 4.365968  | H               | 1.673153  | -4.242781 | 2.759108  |
| H             | 1.559641  | -5.711250 | -2.719944 | H               | -2.719825 | 0.579969  | 4.492268  |

| <i>cis-9</i> |           |           |           | <i>trans-9</i> |           |           |           |
|--------------|-----------|-----------|-----------|----------------|-----------|-----------|-----------|
| H            | 3.091379  | -4.109982 | -5.030217 | H              | 3.340485  | 1.376877  | -5.444965 |
| H            | 2.413693  | -1.737464 | -4.644720 | H              | 1.279863  | 2.297755  | -4.376555 |
| C            | 2.639970  | -3.814675 | -4.079671 | C              | 3.078021  | 1.092304  | -4.422806 |
| H            | -6.214142 | 1.901161  | -3.919090 | H              | -5.484874 | 1.795860  | -4.234947 |
| H            | -4.560724 | 2.433909  | -4.308765 | H              | -3.817726 | 2.412455  | -4.333692 |
| H            | 2.719940  | -5.807968 | -3.238090 | H              | 4.797333  | -0.197889 | -4.169846 |
| H            | -4.896649 | 0.707460  | -4.032456 | H              | -4.109735 | 0.670343  | -4.111033 |
| C            | 2.261408  | -2.486456 | -3.863592 | C              | 1.922745  | 1.607634  | -3.824141 |
| C            | -5.148134 | 1.726938  | -3.697809 | C              | -4.466368 | 1.674755  | -3.830419 |
| H            | -3.179679 | -3.204301 | -4.194323 | H              | -2.606255 | -3.643004 | -3.781007 |
| C            | 2.431775  | -4.766286 | -3.075829 | C              | 3.893719  | 0.209483  | -3.709301 |
| H            | -5.664575 | -3.414428 | -4.072377 | H              | -5.091741 | -3.769592 | -3.970825 |
| C            | -3.719371 | -2.843068 | -3.315463 | C              | -3.239477 | -3.157669 | -3.034250 |
| C            | -5.110835 | -2.958463 | -3.247846 | C              | -4.631514 | -3.228262 | -3.140417 |
| H            | -6.323076 | 3.485525  | -1.870639 | H              | -6.028122 | 3.365144  | -2.245711 |
| H            | -4.712395 | 4.068132  | -2.316220 | H              | -4.395500 | 4.030200  | -2.403062 |
| C            | 1.679261  | -2.109100 | -2.649229 | C              | 1.579695  | 1.238257  | -2.520893 |
| C            | -4.852129 | 1.914926  | -2.207036 | C              | -4.443913 | 1.871887  | -2.311816 |
| C            | -5.244802 | 3.311358  | -1.709645 | C              | -4.987600 | 3.244509  | -1.896783 |
| C            | 1.850956  | -4.391663 | -1.860722 | C              | 3.559133  | -0.157864 | -2.401067 |
| H            | 1.374247  | -1.073097 | -2.488790 | H              | 0.672742  | 1.636351  | -2.056871 |
| H            | -2.769845 | 2.385225  | -2.484502 | H              | -2.369809 | 2.444252  | -2.227176 |
| H            | -5.458477 | 1.175119  | -1.651244 | H              | -5.100547 | 1.100743  | -1.867003 |
| H            | -1.927189 | -2.149018 | -2.320783 | H              | -1.563128 | -2.397738 | -1.890228 |
| C            | -3.012747 | -2.258422 | -2.259007 | C              | -2.650563 | -2.461704 | -1.973169 |
| C            | -5.794347 | -2.482795 | -2.122736 | C              | -5.435789 | -2.603341 | -2.180278 |
| H            | -6.882613 | -2.565455 | -2.066581 | H              | -6.524548 | -2.656760 | -2.257309 |
| H            | -3.067327 | 0.667381  | -2.262026 | H              | -2.617012 | 0.713369  | -2.048098 |
| C            | 1.472146  | -3.055632 | -1.630569 | C              | 2.399005  | 0.353376  | -1.795805 |
| H            | 1.686167  | -5.151868 | -1.094723 | H              | 4.207696  | -0.846286 | -1.856465 |
| C            | -3.365801 | 1.663220  | -1.900025 | C              | -3.023044 | 1.693700  | -1.749889 |
| C            | -4.895570 | 3.502528  | -0.232638 | C              | -4.912922 | 3.444870  | -0.381889 |
| H            | -5.150676 | 4.529241  | 0.079275  | H              | -5.271087 | 4.455454  | -0.122875 |
| C            | -3.687246 | -1.784629 | -1.121718 | C              | -3.449429 | -1.830358 | -1.005618 |
| C            | -5.089119 | -1.897154 | -1.067863 | C              | -4.849946 | -1.908686 | -1.118838 |
| H            | -2.836892 | 3.929420  | -0.578971 | H              | -2.849697 | 3.978218  | -0.363663 |
| H            | -5.530257 | 2.835599  | 0.375490  | H              | -5.610155 | 2.743343  | 0.107397  |
| C            | -2.956675 | 1.819494  | -0.413952 | C              | -2.883427 | 1.866395  | -0.216409 |
| C            | -3.404892 | 3.243466  | 0.074610  | C              | -3.487750 | 3.260134  | 0.181336  |
| P            | 0.732906  | -2.506139 | -0.023089 | P              | 1.908057  | -0.085182 | -0.068376 |
| H            | -5.641544 | -1.530923 | -0.199144 | H              | -5.494610 | -1.435046 | -0.374470 |
| H            | -4.606331 | 0.591181  | 0.378868  | H              | -4.601879 | 0.573800  | 0.303349  |
| Pt           | -0.409446 | -0.496303 | -0.170561 | Pt             | -0.393048 | -0.468015 | 0.155115  |
| S            | -1.066730 | 1.774203  | -0.345050 | S              | -1.041734 | 1.899641  | 0.196273  |
| P            | -2.716570 | -0.971363 | 0.219200  | P              | -2.647232 | -0.916259 | 0.375129  |
| C            | -3.514372 | 0.696460  | 0.476934  | C              | -3.539464 | 0.707741  | 0.561697  |
| H            | -3.325554 | 5.779642  | 1.283246  | H              | -3.760610 | 5.786318  | 1.385379  |
| H            | -1.659160 | 5.243391  | 0.954082  | H              | -2.035215 | 5.344726  | 1.349054  |
| H            | -4.291079 | -3.488396 | 0.894584  | H              | -3.988304 | -3.566683 | 0.913559  |
| C            | -2.533358 | 5.080838  | 1.604510  | C              | -2.998185 | 5.128711  | 1.838668  |
| C            | -3.012837 | 3.622019  | 1.539635  | C              | -3.376975 | 3.646599  | 1.691664  |
| H            | -4.949752 | 4.082518  | 2.480442  | H              | -5.469875 | 3.991273  | 2.283403  |
| H            | -3.308595 | 0.930206  | 1.529677  | H              | -3.496975 | 0.920282  | 1.637866  |
| H            | -2.147162 | 2.992736  | 1.803496  | H              | -2.536012 | 3.062596  | 2.100071  |
| C            | -3.916474 | -3.042635 | 1.816655  | C              | -3.715536 | -3.112138 | 1.867280  |
| C            | -3.162892 | -1.859125 | 1.778343  | C              | -3.097398 | -1.852174 | 1.901322  |
| C            | -4.100488 | 3.390992  | 2.603476  | C              | -4.617763 | 3.345237  | 2.550479  |
| H            | -4.505282 | 2.367897  | 2.592912  | H              | -4.957444 | 2.301969  | 2.467674  |
| H            | -2.245421 | 5.360650  | 2.631473  | H              | -2.907735 | 5.414161  | 2.899962  |
| H            | -4.781750 | -4.590021 | 3.047846  | H              | -4.470297 | -4.779662 | 3.012229  |
| H            | -3.683647 | 3.567199  | 3.608744  | H              | -4.391935 | 3.531887  | 3.613310  |
| C            | -4.192167 | -3.669814 | 3.037484  | C              | -3.987796 | -3.799958 | 3.055771  |
| C            | -2.670154 | -1.332304 | 2.988466  | C              | -2.742844 | -1.302033 | 3.147958  |
| H            | -2.053677 | -0.429391 | 2.983350  | H              | -2.233714 | -0.336004 | 3.197437  |
| C            | -3.718775 | -3.126667 | 4.234089  | C              | -3.647246 | -3.239449 | 4.289226  |
| C            | -2.952427 | -1.955819 | 4.205580  | C              | -3.022512 | -1.987455 | 4.331957  |
| H            | -3.939017 | -3.616335 | 5.185970  | H              | -3.862707 | -3.777390 | 5.215765  |
| H            | -2.567035 | -1.527912 | 5.134478  | H              | -2.744744 | -1.544337 | 5.291567  |
| H            | 1.068860  | 0.073971  | -0.423705 | H              | -0.089621 | -2.032540 | 0.174851  |

|   |           |           |           |   |          |           |           |
|---|-----------|-----------|-----------|---|----------|-----------|-----------|
| C | -0.142221 | -4.027132 | 0.571133  | C | 3.029247 | -1.492912 | 0.366807  |
| C | -1.035765 | -4.695621 | -0.285727 | C | 2.702506 | -2.789455 | -0.068674 |
| C | 0.035010  | -4.515534 | 1.875947  | C | 4.214566 | -1.301414 | 1.096041  |
| C | -1.718785 | -5.834719 | 0.146225  | C | 3.545388 | -3.867101 | 0.212149  |
| H | -1.192421 | -4.337757 | -1.305147 | H | 1.776076 | -2.957433 | -0.621837 |
| C | -0.655758 | -5.653050 | 2.308985  | C | 5.052001 | -2.384817 | 1.386367  |
| H | 0.721135  | -4.015799 | 2.561779  | H | 4.491712 | -0.305145 | 1.444338  |
| C | -1.529092 | -6.318881 | 1.445355  | C | 4.721586 | -3.668378 | 0.944250  |
| H | -2.400679 | -6.346877 | -0.537328 | H | 3.277179 | -4.868074 | -0.135086 |
| H | -0.502711 | -6.020777 | 3.326666  | H | 5.966780 | -2.220029 | 1.961246  |
| H | -2.061693 | -7.211714 | 1.782317  | H | 5.376004 | -4.513501 | 1.172260  |
| C | 2.169639  | -2.374020 | 1.139966  | C | 2.537701 | 1.307668  | 0.965536  |
| C | 3.322567  | -3.166868 | 1.013070  | C | 3.466822 | 2.246635  | 0.490042  |
| C | 2.087947  | -1.459310 | 2.203745  | C | 2.071451 | 1.414305  | 2.288059  |
| C | 4.369197  | -3.047090 | 1.932657  | C | 3.923868 | 3.272460  | 1.325029  |
| H | 3.417927  | -3.878101 | 0.191097  | H | 3.837234 | 2.183113  | -0.534962 |
| C | 3.131200  | -1.347722 | 3.128093  | C | 2.537051 | 2.433395  | 3.122243  |
| H | 1.203595  | -0.824146 | 2.296791  | H | 1.334269 | 0.699335  | 2.662353  |
| C | 4.275339  | -2.140206 | 2.993354  | C | 3.463032 | 3.366177  | 2.641454  |
| H | 5.263108  | -3.665018 | 1.816125  | H | 4.643286 | 4.000628  | 0.942060  |
| H | 3.051684  | -0.631640 | 3.949859  | H | 2.167828 | 2.504733  | 4.148346  |
| H | 5.095339  | -2.047494 | 3.709987  | H | 3.820795 | 4.168507  | 3.291688  |

| <i>cis</i> -10 |           |           |           | <i>trans</i> -10 |           |           |           |
|----------------|-----------|-----------|-----------|------------------|-----------|-----------|-----------|
| H              | 4.341667  | -3.931222 | -4.592409 | H                | 3.874772  | -1.766751 | -5.371365 |
| H              | 4.249933  | -1.600108 | -3.696285 | H                | 1.784270  | -2.768955 | -4.443696 |
| C              | 3.629141  | -3.672435 | -3.805146 | C                | 3.493637  | -1.441552 | -4.400021 |
| H              | 2.794803  | -5.664519 | -3.676907 | H                | 5.085133  | -0.010522 | -4.074471 |
| C              | 3.577032  | -2.366637 | -3.303785 | C                | 2.323238  | -2.003190 | -3.880166 |
| H              | -4.688824 | -2.419854 | -3.932616 | H                | -3.442557 | 0.160283  | -4.486132 |
| C              | 2.763028  | -4.641334 | -3.293969 | C                | 4.171456  | -0.457022 | -3.674139 |
| H              | -6.779943 | -3.314787 | -2.901288 | H                | -5.743905 | -0.805286 | -4.541863 |
| C              | -4.835458 | -2.365308 | -2.851029 | C                | -3.881872 | -0.265459 | -3.580600 |
| C              | -6.006250 | -2.865642 | -2.273462 | C                | -5.170295 | -0.806826 | -3.611544 |
| C              | 2.658956  | -2.032719 | -2.306280 | C                | 1.831050  | -1.582681 | -2.641017 |
| C              | 1.849308  | -4.310958 | -2.285536 | C                | 3.683429  | -0.036337 | -2.433103 |
| H              | 2.618568  | -1.006166 | -1.936432 | H                | 0.910282  | -2.012866 | -2.242639 |
| H              | -2.923657 | -1.416545 | -2.497523 | H                | -2.131683 | 0.134874  | -2.371301 |
| C              | -3.842770 | -1.798377 | -2.045194 | C                | -3.145178 | -0.274075 | -2.391599 |
| C              | -6.183648 | -2.789814 | -0.887634 | C                | -5.721698 | -1.357336 | -2.449112 |
| H              | -7.097328 | -3.177102 | -0.429681 | H                | -6.726710 | -1.786217 | -2.468440 |
| C              | 1.783114  | -3.000987 | -1.782384 | C                | 2.508157  | -0.597653 | -1.901449 |
| H              | 1.189087  | -5.086276 | -1.895107 | H                | 4.222376  | 0.736728  | -1.882028 |
| C              | -4.983153 | 3.266874  | -0.022502 | C                | -4.795539 | 3.233693  | 1.821021  |
| H              | -5.229872 | 4.329389  | 0.140298  | H                | -5.077141 | 4.066013  | 2.487663  |
| C              | -4.010866 | -1.716873 | -0.651226 | C                | -3.693186 | -0.818690 | -1.217093 |
| C              | -5.196626 | -2.215522 | -0.081383 | C                | -4.990168 | -1.362855 | -1.258464 |
| H              | -3.420893 | 3.681476  | -1.487039 | H                | -2.872464 | 4.102950  | 1.271131  |
| C              | -3.128187 | 1.672586  | -0.727512 | C                | -2.814433 | 1.986645  | 0.812949  |
| C              | -3.541767 | 3.139849  | -0.534573 | C                | -3.267669 | 3.163578  | 1.690908  |
| P              | 0.611725  | -2.520329 | -0.421774 | P                | 1.858278  | -0.093900 | -0.244440 |
| H              | -5.355252 | -2.162103 | 0.997239  | H                | -5.432220 | -1.802642 | -0.362104 |
| Pt             | -0.580803 | -0.570040 | -0.787316 | Pt               | -0.454089 | -0.335195 | 0.032108  |
| S              | -1.371408 | 1.600962  | -1.328308 | S                | -0.959340 | 1.962301  | 0.696961  |
| P              | -2.692968 | -0.874975 | 0.330163  | P                | -2.709238 | -0.753407 | 0.340140  |
| C              | -3.339398 | 0.874211  | 0.569380  | C                | -3.401947 | 0.665500  | 1.346847  |
| H              | -3.124829 | -3.654210 | 1.300024  | H                | -2.918100 | -3.539379 | -0.535248 |
| H              | -2.654322 | 1.306637  | 1.320013  | H                | -2.963501 | 0.506812  | 2.348749  |
| C              | -2.942145 | -3.020458 | 2.169414  | C                | -3.117961 | -3.525676 | 0.538913  |
| C              | -2.749067 | -1.636042 | 2.009991  | C                | -3.133389 | -2.304235 | 1.237800  |
| H              | -3.057019 | -4.681248 | 3.539902  | H                | -3.340010 | -5.668468 | 0.646673  |
| C              | -2.900696 | -3.604489 | 3.438940  | C                | -3.353865 | -4.729543 | 1.205711  |
| C              | -2.490609 | -0.858580 | 3.154801  | C                | -3.376637 | -2.319909 | 2.621471  |
| H              | -2.316942 | 0.215599  | 3.070241  | H                | -3.380526 | -1.393367 | 3.197861  |
| C              | -2.656854 | -2.820310 | 4.570248  | C                | -3.602904 | -4.734559 | 2.583025  |
| C              | -2.448165 | -1.445873 | 4.422824  | C                | -3.611761 | -3.528180 | 3.287474  |
| H              | -2.626045 | -3.278445 | 5.561895  | H                | -3.786624 | -5.677061 | 3.104659  |
| H              | -2.252116 | -0.822207 | 5.298588  | H                | -3.802146 | -3.521270 | 4.363532  |
| H              | 0.733420  | -0.097633 | -1.563335 | H                | -0.221151 | -1.865954 | -0.365432 |
| C              | -0.357426 | -4.071602 | -0.157264 | C                | 2.788258  | -1.134868 | 0.966020  |
| C              | -1.394677 | -4.363577 | -1.061177 | C                | 4.052811  | -1.676724 | 0.681907  |
| C              | -0.094724 | -4.969353 | 0.889150  | C                | 2.207593  | -1.378073 | 2.223403  |
| C              | -2.146646 | -5.533031 | -0.926741 | C                | 4.723734  | -2.444552 | 1.639297  |
| H              | -1.617990 | -3.670806 | -1.875442 | H                | 4.519879  | -1.507628 | -0.290144 |
| C              | -0.853654 | -6.137412 | 1.026534  | C                | 2.883986  | -2.139128 | 3.181095  |
| H              | 0.702338  | -4.762698 | 1.605028  | H                | 1.216110  | -0.974770 | 2.445326  |
| C              | -1.878465 | -6.423101 | 0.120114  | C                | 4.142727  | -2.675453 | 2.890265  |
| H              | -2.947708 | -5.746233 | -1.638721 | H                | 5.704605  | -2.865039 | 1.403627  |
| H              | -0.639837 | -6.825730 | 1.848086  | H                | 2.421076  | -2.319538 | 4.154476  |
| H              | -2.468907 | -7.336364 | 0.228646  | H                | 4.668318  | -3.277132 | 3.636118  |
| C              | 1.719820  | -2.407480 | 1.054522  | C                | 2.551598  | 1.602063  | -0.014903 |
| C              | 2.921702  | -3.131401 | 1.143053  | C                | 2.128030  | 2.619951  | -0.889385 |
| C              | 1.343655  | -1.577366 | 2.124326  | C                | 3.450025  | 1.919638  | 1.015738  |
| C              | 3.726817  | -3.029361 | 2.281723  | C                | 2.609706  | 3.922351  | -0.745433 |
| H              | 3.237395  | -3.775989 | 0.320108  | H                | 1.418579  | 2.394667  | -1.689010 |
| C              | 2.148053  | -1.480797 | 3.263791  | C                | 3.922861  | 3.229052  | 1.163854  |
| H              | 0.419488  | -0.998702 | 2.058550  | H                | 3.788871  | 1.147023  | 1.707992  |
| C              | 3.341560  | -2.205236 | 3.344298  | C                | 3.507762  | 4.230956  | 0.283146  |
| H              | 4.660596  | -3.594676 | 2.336068  | H                | 2.276097  | 4.701708  | -1.435112 |
| H              | 1.843004  | -0.830850 | 4.087661  | H                | 4.621623  | 3.461841  | 1.971340  |
| H              | 3.974099  | -2.123991 | 4.231908  | H                | 3.879927  | 5.252108  | 0.398311  |
| C              | -5.186768 | 2.465990  | 1.267220  | C                | -5.371686 | 1.913598  | 2.342242  |
| C              | -4.785366 | 0.994896  | 1.081551  | C                | -4.934932 | 0.728556  | 1.468027  |
| H              | -5.681853 | 2.898569  | -0.795795 | H                | -5.238278 | 3.460794  | 0.833900  |
| H              | -6.237552 | 2.524142  | 1.597038  | H                | -6.472938 | 1.959436  | 2.379722  |
| H              | -4.579082 | 2.912124  | 2.075516  | H                | -5.028997 | 1.748039  | 3.379921  |

|   |           |          |           |   |           |           |           |
|---|-----------|----------|-----------|---|-----------|-----------|-----------|
| H | -5.472149 | 0.523741 | 0.358659  | H | -5.377009 | 0.839574  | 0.463645  |
| H | -4.900616 | 0.447279 | 2.030909  | H | -5.327749 | -0.213874 | 1.883043  |
| H | -2.848565 | 3.609233 | 0.186294  | H | -2.813510 | 3.049718  | 2.691640  |
| H | -3.768189 | 1.236306 | -1.514372 | H | -3.209722 | 2.149995  | -0.205455 |

| <i>cis-11-chair</i> |           |           |           | <i>trans-11-chair</i> |           |           |           |
|---------------------|-----------|-----------|-----------|-----------------------|-----------|-----------|-----------|
| H                   | 2.404429  | 0.408339  | -5.415950 | H                     | 2.581372  | -0.957071 | -5.203201 |
| H                   | 1.114211  | 2.133440  | -4.149364 | H                     | 0.721095  | 0.585297  | -4.570396 |
| C                   | 2.206170  | 0.272694  | -4.349797 | C                     | 2.315349  | -0.819353 | -4.152127 |
| C                   | 1.482610  | 1.239422  | -3.639983 | C                     | 1.273061  | 0.044299  | -3.797673 |
| H                   | 3.233865  | -1.626997 | -4.232847 | H                     | 3.824988  | -2.187212 | -3.421729 |
| C                   | 2.669560  | -0.865861 | -3.688026 | C                     | 3.011092  | -1.508310 | -3.155066 |
| H                   | 3.398002  | -0.449553 | 5.639839  | H                     | -7.272061 | 2.166710  | -1.420479 |
| C                   | 1.220899  | 1.061780  | -2.280768 | C                     | 0.925199  | 0.211898  | -2.455035 |
| H                   | 0.642217  | 1.816535  | -1.742465 | H                     | 0.097533  | 0.872602  | -2.189356 |
| H                   | 3.507589  | -2.934188 | 5.880686  | H                     | -5.967888 | 4.075162  | -2.361369 |
| C                   | 2.416309  | -1.041441 | -2.320964 | C                     | 2.671244  | -1.333775 | -1.808883 |
| C                   | 2.602162  | -1.077332 | 5.230963  | C                     | -6.213211 | 2.281686  | -1.175146 |
| C                   | 2.664069  | -2.467771 | 5.365657  | C                     | -5.482077 | 3.350819  | -1.702671 |
| C                   | 1.687003  | -0.080706 | -1.604883 | C                     | 1.622688  | -0.472126 | -1.443775 |
| H                   | 2.791491  | -1.935676 | -1.821001 | H                     | 3.229648  | -1.875812 | -1.044051 |
| H                   | 1.485347  | 0.607607  | 4.498192  | H                     | -6.178563 | 0.522206  | 0.068346  |
| H                   | -1.868792 | 4.399760  | 3.697356  | H                     | -4.231747 | -4.119162 | -0.877133 |
| H                   | 4.167137  | 0.531878  | -0.396473 | H                     | 3.224465  | 1.528660  | -1.068347 |
| C                   | 1.519262  | -0.480152 | 4.579566  | C                     | -5.593472 | 1.352489  | -0.333324 |
| H                   | 5.663641  | 2.280482  | 0.502158  | H                     | 4.417342  | 3.582225  | -0.375965 |
| H                   | -1.971333 | 4.315749  | 6.190439  | H                     | -6.212756 | -4.649353 | 0.548395  |
| H                   | 3.955825  | -1.190898 | 1.457079  | H                     | 3.843462  | -0.463287 | 1.694141  |
| C                   | -1.708778 | 3.454944  | 4.222783  | C                     | -4.574099 | -3.404290 | -0.124760 |
| C                   | 1.639169  | -3.256574 | 4.835605  | C                     | -4.125667 | 3.486193  | -1.388984 |
| H                   | 1.678047  | -4.344580 | 4.930701  | H                     | -3.546924 | 4.316800  | -1.800901 |
| H                   | -1.091526 | 0.223564  | -0.789470 | H                     | -1.355526 | 0.369337  | -0.701362 |
| C                   | -1.767483 | 3.407329  | 5.617892  | C                     | -5.683653 | -3.701376 | 0.674055  |
| H                   | -1.421660 | 2.325961  | 2.399270  | H                     | -3.014825 | -1.977012 | -0.570100 |
| C                   | 3.802425  | 1.194097  | 0.391821  | C                     | 3.032047  | 1.951815  | -0.080995 |
| C                   | -1.449715 | 2.290322  | 3.490350  | C                     | -3.892378 | -2.196441 | 0.042665  |
| C                   | 4.647024  | 2.187789  | 0.892325  | C                     | 3.708000  | 3.113449  | 0.310808  |
| C                   | 0.476647  | -1.262669 | 4.050867  | C                     | -4.230439 | 1.479455  | -0.016342 |
| C                   | -1.565801 | 2.190698  | 6.281044  | C                     | -6.109154 | -2.783110 | 1.637942  |
| C                   | 0.557122  | -2.660875 | 4.179818  | C                     | -3.501803 | 2.553111  | -0.555366 |
| C                   | 3.333683  | -2.051421 | 1.207698  | C                     | 3.314796  | -1.415802 | 1.767073  |
| H                   | -1.612092 | 2.146386  | 7.372123  | H                     | -6.972129 | -3.009383 | 2.269083  |
| H                   | 4.811051  | -3.465184 | 1.900184  | H                     | 4.926668  | -2.375405 | 2.837377  |
| P                   | 1.339358  | -0.226543 | 0.214055  | P                     | 1.172975  | -0.185408 | 0.329783  |
| C                   | -1.240308 | 1.066194  | 4.145781  | C                     | -4.317375 | -1.261300 | 1.004263  |
| C                   | 2.490983  | 1.056515  | 0.885475  | C                     | 2.114292  | 1.339095  | 0.787456  |
| C                   | -1.303422 | 1.029009  | 5.551343  | C                     | -5.432802 | -1.569110 | 1.801990  |
| Pt                  | -0.912585 | -0.088073 | 0.756530  | Pt                    | -1.105112 | 0.035012  | 0.831134  |
| C                   | 3.818699  | -3.340164 | 1.459812  | C                     | 3.927220  | -2.495957 | 2.411841  |
| H                   | -0.224742 | -3.303281 | 3.771201  | H                     | -2.436832 | 2.648133  | -0.328514 |
| C                   | 4.190375  | 3.068234  | 1.880252  | C                     | 3.478881  | 3.669880  | 1.572027  |
| H                   | 4.850628  | 3.849345  | 2.265406  | H                     | 4.007445  | 4.577158  | 1.875576  |
| C                   | 2.060466  | -1.871166 | 0.646146  | C                     | 2.028969  | -1.554157 | 1.220653  |
| P                   | -0.944493 | -0.473584 | 3.162781  | P                     | -3.385782 | 0.322401  | 1.152205  |
| H                   | -1.139610 | 0.090232  | 6.086374  | H                     | -5.787082 | -0.869468 | 2.560939  |
| C                   | 2.039132  | 1.953643  | 1.864810  | C                     | 1.884914  | 1.906677  | 2.055330  |
| C                   | 2.883670  | 2.952992  | 2.361078  | C                     | 2.568500  | 3.061164  | 2.444100  |
| C                   | 3.041487  | -4.459803 | 1.151781  | C                     | 3.264446  | -3.722920 | 2.512352  |
| C                   | 1.275328  | -3.003806 | 0.358389  | C                     | 1.365321  | -2.788275 | 1.333089  |
| H                   | 1.013772  | 1.880925  | 2.229111  | H                     | 1.170112  | 1.431379  | 2.733318  |
| H                   | 3.425353  | -5.464594 | 1.345456  | H                     | 3.744051  | -4.565009 | 3.017731  |
| H                   | 2.512859  | 3.645592  | 3.120689  | H                     | 2.385032  | 3.490587  | 3.432405  |
| H                   | 0.272842  | -2.873953 | -0.058605 | H                     | 0.355994  | -2.900653 | 0.929055  |
| C                   | -2.365270 | -1.555471 | 3.684196  | C                     | -3.863165 | 1.055660  | 2.784469  |
| C                   | 1.765805  | -4.288551 | 0.601936  | C                     | 1.982472  | -3.867455 | 1.970447  |
| S                   | -3.303769 | 0.108596  | 0.689445  | S                     | -0.742148 | -0.582368 | 3.202022  |
| H                   | -3.928383 | -2.123459 | 1.452289  | H                     | -1.509013 | 1.517395  | 4.193407  |
| C                   | -4.106790 | -1.102283 | 1.828730  | C                     | -1.825425 | 0.462868  | 4.269208  |
| H                   | 1.147637  | -5.158281 | 0.365621  | H                     | 1.455636  | -4.821347 | 2.052710  |
| H                   | -5.183502 | -0.905054 | 1.703788  | H                     | -1.600814 | 0.142484  | 5.298919  |
| C                   | -3.760020 | -1.033749 | 3.314158  | C                     | -3.335246 | 0.360527  | 4.047295  |
| H                   | -2.207469 | -2.541766 | 3.217910  | H                     | -3.489905 | 2.093018  | 2.741341  |
| H                   | -2.287657 | -1.698497 | 4.773620  | H                     | -4.962218 | 1.130901  | 2.808023  |
| H                   | -4.491239 | -1.659662 | 3.857613  | H                     | -3.839245 | 0.838455  | 4.907429  |
| H                   | -3.900100 | -0.005892 | 3.689143  | H                     | -3.640375 | -0.699109 | 4.063365  |

| <i>cis-11-skew-boat</i> |           |           |           | <i>trans-11-skew-boat</i> |           |           |           |
|-------------------------|-----------|-----------|-----------|---------------------------|-----------|-----------|-----------|
| H                       | -6.190175 | -0.723450 | -4.641901 | H                         | -6.839851 | 0.725931  | -3.568792 |
| H                       | -5.629867 | 1.397215  | -3.444904 | H                         | -5.903758 | 2.386134  | -1.955939 |
| C                       | -5.310361 | -0.673586 | -3.995475 | C                         | -5.863360 | 0.553629  | -3.109114 |
| C                       | -4.996368 | 0.514673  | -3.325399 | C                         | -5.338518 | 1.484949  | -2.206154 |
| H                       | -4.733692 | -2.728780 | -4.347217 | H                         | -5.544425 | -1.334913 | -4.116986 |
| C                       | -4.494407 | -1.795362 | -3.831575 | C                         | -5.137868 | -0.601266 | -3.416306 |
| H                       | -8.188330 | 2.777333  | 2.013553  | H                         | -0.004316 | -1.154540 | 7.667966  |
| C                       | -3.870838 | 0.578567  | -2.502140 | C                         | -4.094805 | 1.260008  | -1.611161 |
| H                       | -3.635759 | 1.515488  | -1.992205 | H                         | -3.698089 | 1.981256  | -0.892227 |
| H                       | -7.157146 | 4.761615  | 0.906926  | H                         | 1.623316  | -2.690816 | 6.565444  |
| C                       | -3.361584 | -1.731393 | -3.011224 | C                         | -3.887962 | -0.824847 | -2.828400 |
| C                       | -7.167172 | 2.720856  | 1.628293  | C                         | 0.136834  | -1.118649 | 6.584911  |
| C                       | -6.588006 | 3.834104  | 1.008137  | C                         | 1.049446  | -1.979513 | 5.966169  |
| C                       | -3.034374 | -0.541391 | -2.343240 | C                         | -3.354916 | 0.105700  | -1.922202 |
| H                       | -2.730036 | -2.614629 | -2.902938 | H                         | -3.330662 | -1.729642 | -3.078762 |
| H                       | -6.909032 | 0.676269  | 2.250179  | H                         | -1.305025 | 0.456583  | 6.323842  |
| H                       | -7.784247 | -2.174956 | -1.259740 | H                         | 1.682606  | 4.392384  | 5.511525  |
| H                       | -1.409674 | 0.541688  | -4.117195 | H                         | -1.965592 | 1.013822  | -3.899916 |
| C                       | -6.441303 | 1.534149  | 1.761164  | C                         | -0.600368 | -0.209033 | 5.820697  |
| H                       | -0.099593 | 2.290536  | -5.262297 | H                         | -0.393973 | 2.221403  | -5.375313 |
| H                       | -6.911892 | -4.491238 | -0.938825 | H                         | 0.967085  | 6.239610  | 3.994224  |
| H                       | 0.262145  | -1.300688 | -3.518263 | H                         | 0.083123  | -1.531985 | -3.103033 |
| C                       | -6.875938 | -2.343452 | -0.675666 | C                         | 0.934616  | 4.207407  | 4.736360  |
| C                       | -5.278316 | 3.758464  | 0.525729  | C                         | 1.221390  | -1.931045 | 4.579154  |
| H                       | -4.816982 | 4.626786  | 0.048881  | H                         | 1.929235  | -2.604423 | 4.089607  |
| H                       | -0.139692 | -0.047947 | 0.906511  | H                         | -0.145503 | 0.963598  | 0.927845  |
| C                       | -6.386607 | -3.639943 | -0.498594 | C                         | 0.534253  | 5.241873  | 3.886289  |
| H                       | -6.606204 | -0.246605 | -0.262695 | H                         | 0.705648  | 2.132471  | 5.274397  |
| C                       | -0.722944 | 1.158070  | -3.534205 | C                         | -0.958467 | 1.232224  | -3.541265 |
| C                       | -6.208623 | -1.250821 | -0.109508 | C                         | 0.381914  | 2.928419  | 4.601283  |
| C                       | 0.015173  | 2.151418  | -4.184345 | C                         | -0.068038 | 1.913503  | -4.378605 |
| C                       | -5.125704 | 1.443773  | 1.269232  | C                         | -0.432936 | -0.152074 | 4.424882  |
| C                       | -5.215611 | -3.841420 | 0.240691  | C                         | -0.417954 | 4.993067  | 2.891077  |
| C                       | -4.550929 | 2.570701  | 0.657982  | C                         | 0.482324  | -1.025713 | 3.811869  |
| C                       | 0.191924  | -2.099452 | -2.778093 | C                         | -0.375070 | -2.275202 | -2.448234 |
| H                       | -4.819770 | -4.850666 | 0.379692  | H                         | -0.731085 | 5.794794  | 2.217538  |
| H                       | 1.484472  | -3.410743 | -3.904504 | H                         | 0.624435  | -3.925392 | -3.418892 |
| P                       | -1.534998 | -0.379713 | -1.269700 | P                         | -1.700315 | -0.106328 | -1.134251 |
| C                       | -5.040697 | -1.443811 | 0.643725  | C                         | -0.573848 | 2.671437  | 3.606000  |
| C                       | -0.591590 | 0.958510  | -2.146665 | C                         | -0.562778 | 0.833971  | -2.252769 |
| C                       | -4.545534 | -2.752406 | 0.802427  | C                         | -0.962768 | 3.715013  | 2.746396  |
| Pt                      | -1.733699 | 0.017657  | 1.005746  | Pt                        | -1.624960 | 0.417743  | 1.146341  |
| C                       | 0.885361  | -3.293658 | -2.997962 | C                         | -0.069326 | -3.629335 | -2.627932 |
| H                       | -3.519770 | 2.517451  | 0.298758  | H                         | 0.603331  | -0.997923 | 2.726178  |
| C                       | 0.891978  | 2.964998  | -3.459631 | C                         | 1.229349  | 2.198240  | -3.944280 |
| H                       | 1.465467  | 3.744054  | -3.968265 | H                         | 1.923500  | 2.731147  | -4.599000 |
| C                       | -0.577234 | -1.926762 | -1.614658 | C                         | -1.261088 | -1.877357 | -1.433901 |
| P                       | -4.106668 | -0.078693 | 1.469243  | P                         | -1.380051 | 1.026317  | 3.378729  |
| H                       | -3.627918 | -2.926314 | 1.370447  | H                         | -1.687321 | 3.520256  | 1.950833  |
| C                       | 0.287789  | 1.786803  | -1.427803 | C                         | 0.742723  | 1.130495  | -1.823194 |
| C                       | 1.024704  | 2.780351  | -2.080476 | C                         | 1.633292  | 1.801634  | -2.664672 |
| C                       | 0.816904  | -4.331107 | -2.062315 | C                         | -0.647736 | -4.597122 | -1.802180 |
| C                       | -0.632501 | -2.971430 | -0.676206 | C                         | -1.837474 | -2.856605 | -0.602653 |
| H                       | 0.388493  | 1.656109  | -0.349275 | H                         | 1.059513  | 0.842415  | -0.818816 |
| H                       | 1.701396  | 3.415658  | -1.503520 | H                         | 2.644767  | 2.022655  | -2.314694 |
| H                       | -1.208895 | -2.836740 | 0.241986  | H                         | -2.526754 | -2.551537 | 0.190175  |
| C                       | -4.347889 | -0.563334 | 3.253441  | C                         | -3.012435 | 1.285486  | 4.221463  |
| C                       | 0.055249  | -4.167848 | -0.901115 | C                         | -1.534859 | -4.207264 | -0.791931 |
| S                       | -1.249962 | 0.521151  | 3.295571  | S                         | -3.906373 | -0.447075 | 1.558615  |
| H                       | -3.031977 | 2.163554  | 3.278461  | H                         | -2.915441 | -1.631265 | 3.434476  |
| C                       | -2.740778 | 1.366979  | 3.978887  | C                         | -3.831785 | -1.033796 | 3.307625  |
| H                       | 0.002475  | -4.969928 | -0.160675 | H                         | -1.990902 | -4.958922 | -0.142455 |
| H                       | -2.406836 | 1.871295  | 4.899327  | H                         | -4.674452 | -1.729032 | 3.447327  |
| H                       | 1.361800  | -5.262602 | -2.235356 | H                         | -0.406909 | -5.653836 | -1.943726 |
| C                       | -3.947662 | 0.480798  | 4.308633  | C                         | -3.912782 | 0.047465  | 4.393999  |
| H                       | -3.760852 | -0.060753 | 5.251506  | H                         | -4.951841 | 0.410141  | 4.470800  |
| H                       | -4.805548 | 1.148397  | 4.502660  | H                         | -3.684554 | -0.435365 | 5.360520  |
| H                       | -5.393464 | -0.874454 | 3.401235  | H                         | -2.843930 | 1.781281  | 5.190246  |
| H                       | -3.729276 | -1.467254 | 3.360271  | H                         | -3.502553 | 2.028445  | 3.573284  |

| <b>cis-11-boat</b> |           |           |           | <b>trans-11-boat</b> |           |           |           |
|--------------------|-----------|-----------|-----------|----------------------|-----------|-----------|-----------|
| H                  | 2.725386  | 0.498401  | -5.224694 | H                    | 2.438860  | -0.684017 | -5.284464 |
| H                  | 1.250234  | 2.156147  | -4.075376 | H                    | 0.652409  | 0.888500  | -4.524616 |
| C                  | 2.422217  | 0.336986  | -4.187180 | C                    | 2.197200  | -0.598936 | -4.221992 |
| C                  | 1.594869  | 1.265977  | -3.543123 | C                    | 1.196214  | 0.281502  | -3.796441 |
| H                  | 3.498946  | -1.528557 | -3.990601 | H                    | 3.665189  | -2.063630 | -3.603414 |
| C                  | 2.854321  | -0.796870 | -3.496964 | C                    | 2.883051  | -1.371585 | -3.281264 |
| H                  | 2.063468  | 0.069095  | 6.303950  | H                    | -6.523661 | 1.418721  | -2.557109 |
| C                  | 1.199509  | 1.055096  | -2.221644 | C                    | 0.879081  | 0.382188  | -2.439844 |
| H                  | 0.541476  | 1.780024  | -1.735971 | H                    | 0.083809  | 1.058470  | -2.119976 |
| H                  | 2.860026  | -2.298164 | 6.267227  | H                    | -5.801854 | 3.802577  | -2.718325 |
| C                  | 2.466664  | -1.005406 | -2.166377 | C                    | 2.574539  | -1.264318 | -1.920385 |
| C                  | 1.580468  | -0.663622 | 5.652456  | C                    | -5.761981 | 1.809253  | -1.877468 |
| C                  | 2.027018  | -1.987754 | 5.631532  | C                    | -5.357923 | 3.143166  | -1.968383 |
| C                  | 1.633160  | -0.083047 | -1.517159 | C                    | 1.566921  | -0.387085 | -1.484528 |
| H                  | 2.819472  | -1.895015 | -1.642483 | H                    | 3.125511  | -1.870999 | -1.200127 |
| H                  | 0.169331  | 0.768665  | 4.889332  | H                    | -5.525326 | -0.076244 | -0.860390 |
| H                  | -3.043668 | 4.062941  | 3.145619  | H                    | -4.072848 | -4.476350 | 0.321912  |
| H                  | 3.866872  | 0.761344  | -0.099052 | H                    | 3.276890  | 1.512818  | -0.995854 |
| C                  | 0.508062  | -0.267545 | 4.846714  | C                    | -5.196671 | 0.962800  | -0.915703 |
| H                  | 5.123071  | 2.584401  | 0.998863  | H                    | 4.498237  | 3.521838  | -0.224789 |
| H                  | -3.764682 | 3.920685  | 5.531698  | H                    | -6.420323 | -4.513158 | 1.170047  |
| H                  | 3.643536  | -1.054111 | 1.713944  | H                    | 3.829549  | -0.492782 | 1.668725  |
| C                  | -2.933190 | 3.126834  | 3.698635  | C                    | -4.532162 | -3.562749 | 0.707349  |
| C                  | 1.402871  | -2.911095 | 4.787148  | C                    | -4.376593 | 3.629845  | -1.096302 |
| H                  | 1.748902  | -3.946825 | 4.753030  | H                    | -4.048659 | 4.670217  | -1.163608 |
| H                  | -1.227296 | 0.015539  | -1.046515 | H                    | -1.344224 | 0.540060  | -0.621618 |
| C                  | -3.337650 | 3.046753  | 5.033255  | C                    | -5.846354 | -3.583153 | 1.182075  |
| H                  | -2.087892 | 2.067956  | 2.012247  | H                    | -2.767191 | -2.361355 | 0.359675  |
| C                  | 3.383777  | 1.345559  | 0.687192  | C                    | 3.066566  | 1.919898  | -0.005290 |
| C                  | -2.388207 | 2.006363  | 3.060029  | C                    | -3.795946 | -2.373296 | 0.726842  |
| C                  | 4.092830  | 2.380727  | 1.301319  | C                    | 3.758517  | 3.055681  | 0.431011  |
| C                  | -0.136614 | -1.190304 | 4.004062  | C                    | -4.216676 | 1.443906  | -0.034081 |
| C                  | -3.194234 | 1.841206  | 5.730970  | C                    | -6.426132 | -2.407622 | 1.672421  |
| C                  | 0.337136  | -2.514590 | 3.975167  | C                    | -3.806106 | 2.785801  | -0.141589 |
| C                  | 3.107795  | -1.958750 | 1.423085  | C                    | 3.325526  | -1.461067 | 1.673918  |
| H                  | -3.507322 | 1.770862  | 6.775720  | H                    | -7.454697 | -2.414895 | 2.041568  |
| H                  | 4.615042  | -3.259032 | 2.258542  | H                    | 4.959847  | -2.448194 | 2.683202  |
| P                  | 1.088114  | -0.281415 | 0.246904  | P                    | 1.158852  | -0.189444 | 0.311246  |
| C                  | -2.240424 | 0.791852  | 3.749454  | C                    | -4.366374 | -1.188549 | 1.222379  |
| C                  | 2.056480  | 1.066471  | 1.065144  | C                    | 2.109693  | 1.311441  | 0.823188  |
| C                  | -2.649801 | 0.723620  | 5.094911  | C                    | -5.692891 | -1.218474 | 1.691239  |
| Pt                 | -1.215461 | -0.283677 | 0.515750  | Pt                   | -1.112743 | 0.017140  | 0.860347  |
| C                  | 3.658182  | -3.207607 | 1.733050  | C                    | 3.965451  | -2.566368 | 2.245398  |
| H                  | -0.117030 | -3.252366 | 3.310474  | H                    | -3.024636 | 3.176737  | 0.515911  |
| C                  | 3.483684  | 3.160380  | 2.291438  | C                    | 3.506488  | 3.590284  | 1.697552  |
| H                  | 4.037697  | 3.974229  | 2.765946  | H                    | 4.047508  | 4.477701  | 2.035837  |
| C                  | 1.878065  | -1.873003 | 0.753019  | C                    | 2.045761  | -1.595206 | 1.112064  |
| P                  | -1.529505 | -0.687344 | 2.888057  | P                    | -3.377023 | 0.369289  | 1.214441  |
| H                  | -2.537021 | -0.204456 | 5.660959  | H                    | -6.170873 | -0.310853 | 2.067401  |
| C                  | 1.452162  | 1.862212  | 2.049907  | C                    | 1.857411  | 1.857160  | 2.095793  |
| C                  | 2.161325  | 2.901904  | 2.661113  | C                    | 2.556953  | 2.985998  | 2.529671  |
| C                  | 2.990206  | -4.381706 | 1.374935  | C                    | 3.336809  | -3.814960 | 2.256642  |
| C                  | 1.202626  | -3.059873 | 0.411885  | C                    | 1.415927  | -2.852010 | 1.136829  |
| H                  | 0.414247  | 1.677680  | 2.328460  | H                    | 1.111148  | 1.389105  | 2.743669  |
| H                  | 3.424797  | -5.355529 | 1.614424  | H                    | 3.838079  | -4.677156 | 2.703755  |
| H                  | 1.672949  | 3.514229  | 3.423183  | H                    | 2.354795  | 3.398754  | 3.521412  |
| H                  | 0.233268  | -3.003943 | -0.091272 | H                    | 0.412599  | -2.965524 | 0.719661  |
| C                  | -2.790467 | -2.027676 | 3.227974  | C                    | -3.771618 | 1.223969  | 2.829198  |
| C                  | 1.758610  | -4.305140 | 0.714112  | C                    | 2.061061  | -3.955946 | 1.699303  |
| S                  | -3.571304 | -0.254206 | 0.134111  | S                    | -0.761252 | -0.823781 | 3.152943  |
| H                  | -5.484507 | -1.201839 | 1.158339  | H                    | -1.810914 | -0.365731 | 5.242808  |
| C                  | -4.488252 | -0.972114 | 1.566596  | C                    | -2.186107 | -0.307766 | 4.209482  |
| H                  | 1.226015  | -5.218153 | 0.436234  | H                    | 1.560800  | -4.927477 | 1.711188  |
| H                  | -4.635497 | -0.210923 | 2.351116  | H                    | -3.003078 | -1.045815 | 4.132272  |
| C                  | -3.871816 | -2.245001 | 2.158542  | C                    | -2.726568 | 1.103873  | 3.948403  |
| H                  | -2.230212 | -2.961506 | 3.376668  | H                    | -3.932438 | 2.284002  | 2.583610  |
| H                  | -3.251591 | -1.785281 | 4.198187  | H                    | -4.742900 | 0.834540  | 3.171399  |
| H                  | -3.468448 | -2.856142 | 1.334962  | H                    | -1.878472 | 1.777699  | 3.744534  |
| H                  | -4.670349 | -2.845690 | 2.628647  | H                    | -3.207173 | 1.479227  | 4.869386  |



| TS[ <i>trans</i> -11-boat→skew-boat] |           |           |           | TS[ <i>trans</i> -11-skew-boat→chair] |           |           |           |
|--------------------------------------|-----------|-----------|-----------|---------------------------------------|-----------|-----------|-----------|
| H                                    | 2.366338  | -3.909748 | -4.143913 | H                                     | 1.844106  | -0.941550 | -5.521095 |
| H                                    | 0.513535  | -2.256821 | -4.419717 | H                                     | -0.086832 | -2.000159 | -4.341757 |
| C                                    | 2.118825  | -3.221995 | -3.331401 | C                                     | 1.711382  | -0.797699 | -4.445836 |
| C                                    | 1.079788  | -2.296019 | -3.485770 | C                                     | 0.629314  | -1.390350 | -3.785206 |
| H                                    | 3.645932  | -3.984631 | -2.002263 | H                                     | 3.464557  | 0.452658  | -4.231794 |
| C                                    | 2.834428  | -3.264278 | -2.132807 | C                                     | 2.618239  | -0.017045 | -3.724262 |
| H                                    | -7.557478 | 2.721380  | 0.339538  | H                                     | -5.006282 | 2.004500  | -2.970378 |
| C                                    | 0.755761  | -1.425046 | -2.444055 | C                                     | 0.452520  | -1.196528 | -2.413199 |
| H                                    | -0.068159 | -0.718577 | -2.568766 | H                                     | -0.406626 | -1.645081 | -1.910139 |
| H                                    | -6.248654 | 4.684526  | -0.477182 | H                                     | -5.789850 | 4.237033  | -2.168146 |
| C                                    | 2.518850  | -2.383277 | -1.090640 | C                                     | 2.449561  | 0.168663  | -2.347309 |
| C                                    | -6.470445 | 2.656116  | 0.247024  | C                                     | -4.883892 | 2.284851  | -1.921189 |
| C                                    | -5.735981 | 3.756416  | -0.211906 | C                                     | -5.322925 | 3.536280  | -1.471553 |
| C                                    | 1.474192  | -1.457117 | -1.235192 | C                                     | 1.363173  | -0.418156 | -1.676939 |
| H                                    | 3.093086  | -2.425680 | -0.163736 | H                                     | 3.171103  | 0.776704  | -1.799254 |
| H                                    | -6.407118 | 0.615740  | 0.928191  | H                                     | -3.930423 | 0.424107  | -1.397717 |
| H                                    | -5.248832 | -1.928848 | -3.405145 | H                                     | -4.216377 | -4.371847 | 1.306803  |
| H                                    | 3.254962  | 0.389944  | -1.800576 | H                                     | 3.971393  | -0.098424 | 1.118714  |
| C                                    | -5.816611 | 1.469291  | 0.584560  | C                                     | -4.281525 | 1.392658  | -1.033015 |
| H                                    | 4.242477  | 2.524331  | -2.563084 | H                                     | 5.448346  | 1.815078  | 1.662364  |
| H                                    | -6.307417 | -3.984684 | -2.455578 | H                                     | -6.695324 | -4.113658 | 1.429752  |
| H                                    | 3.664272  | 0.681972  | 1.229583  | H                                     | 1.197872  | -1.282282 | 2.851349  |
| C                                    | -5.206013 | -2.122629 | -2.330415 | C                                     | -4.663113 | -3.375530 | 1.352996  |
| C                                    | -4.347255 | 3.662271  | -0.332653 | C                                     | -5.158478 | 3.885233  | -0.129319 |
| H                                    | -3.768033 | 4.516189  | -0.692883 | H                                     | -5.496449 | 4.860276  | 0.230476  |
| H                                    | -1.482309 | -1.109597 | -0.633422 | H                                     | -1.603228 | -0.373728 | -0.535480 |
| C                                    | -5.799262 | -3.274480 | -1.798595 | C                                     | -6.051571 | -3.230420 | 1.422024  |
| H                                    | -4.091681 | -0.326767 | -1.921870 | H                                     | -2.753598 | -2.352483 | 1.274620  |
| C                                    | 2.850766  | 1.331115  | -1.423074 | C                                     | 3.589138  | 0.919986  | 1.024255  |
| C                                    | -4.555291 | -1.217941 | -1.491088 | C                                     | -3.839586 | -2.244145 | 1.337904  |
| C                                    | 3.409821  | 2.537727  | -1.855241 | C                                     | 4.423785  | 2.000537  | 1.330123  |
| C                                    | -4.417511 | 1.368480  | 0.473056  | C                                     | -4.119019 | 1.731692  | 0.323273  |
| C                                    | -5.736008 | -3.509322 | -0.424107 | C                                     | -6.617245 | -1.950836 | 1.477247  |
| C                                    | -3.689631 | 2.473885  | 0.006595  | C                                     | -4.562045 | 2.988707  | 0.766103  |
| C                                    | 3.293584  | -0.145890 | 1.836725  | C                                     | 1.753947  | -1.995506 | 2.235474  |
| H                                    | -6.194910 | -4.404695 | 0.002629  | H                                     | -7.702625 | -1.832916 | 1.527443  |
| H                                    | 4.993881  | -0.096179 | 3.167672  | H                                     | 2.212412  | -3.309758 | 3.883942  |
| P                                    | 1.025877  | -0.248089 | 0.094164  | P                                     | 1.121271  | -0.227843 | 0.148848  |
| C                                    | -4.488435 | -1.443250 | -0.102882 | C                                     | -4.398856 | -0.957512 | 1.396083  |
| C                                    | 1.776887  | 1.329190  | -0.514813 | C                                     | 2.269027  | 1.142983  | 0.601619  |
| C                                    | -5.085645 | -2.599951 | 0.420384  | C                                     | -5.796881 | -0.820122 | 1.465448  |
| Pt                                   | -1.268060 | -0.143574 | 0.605904  | Pt                                    | -1.077971 | 0.125043  | 0.883430  |
| C                                    | 4.046306  | -0.586877 | 2.931527  | C                                     | 2.325819  | -3.132694 | 2.811269  |
| H                                    | -2.604126 | 2.401376  | -0.082315 | H                                     | -4.447391 | 3.286481  | 1.809178  |
| C                                    | 2.904907  | 3.754837  | -1.386530 | C                                     | 3.950043  | 3.310725  | 1.213008  |
| H                                    | 3.341030  | 4.697169  | -1.727802 | H                                     | 4.603287  | 4.153249  | 1.453797  |
| C                                    | 2.071344  | -0.760804 | 1.524960  | C                                     | 1.895727  | -1.751090 | 0.856326  |
| P                                    | -3.559869 | -0.210087 | 0.917878  | P                                     | -3.294174 | 0.518298  | 1.439223  |
| H                                    | -5.054704 | -2.814858 | 1.489166  | H                                     | -6.252024 | 0.173148  | 1.501473  |
| C                                    | 1.272474  | 2.556714  | -0.051073 | C                                     | 1.796909  | 2.463079  | 0.494079  |
| C                                    | 1.837459  | 3.760617  | -0.483138 | C                                     | 2.635050  | 3.540105  | 0.792981  |
| C                                    | 3.589630  | -1.647473 | 3.718535  | C                                     | 3.035651  | -4.043977 | 2.020681  |
| C                                    | 1.612373  | -1.820200 | 2.328845  | C                                     | 2.612319  | -2.667450 | 0.069021  |
| H                                    | 0.434930  | 2.570338  | 0.651412  | H                                     | 0.764900  | 2.646460  | 0.182866  |
| H                                    | 4.179075  | -1.989972 | 4.572798  | H                                     | 3.476928  | -4.936061 | 2.472521  |
| H                                    | 1.435697  | 4.707648  | -0.113890 | H                                     | 2.256407  | 4.561534  | 0.705984  |
| H                                    | 0.650293  | -2.290409 | 2.108259  | H                                     | 2.734407  | -2.497755 | -1.001989 |
| C                                    | -4.076064 | -0.540121 | 2.674963  | C                                     | -3.523882 | 1.195922  | 3.143131  |
| H                                    | -5.086339 | -0.117592 | 2.794888  | C                                     | 3.176636  | -3.808863 | 0.650355  |
| C                                    | 2.370866  | -2.265217 | 3.413540  | S                                     | -0.348186 | 0.959804  | 3.097679  |
| S                                    | -0.959095 | 1.361226  | 2.544626  | H                                     | -1.076830 | 0.471056  | 5.307811  |
| H                                    | -3.247938 | 2.053839  | 3.120437  | C                                     | -1.425993 | 0.102396  | 4.331311  |
| H                                    | -4.174144 | -1.629219 | 2.783101  | H                                     | 3.729608  | -4.514905 | 0.025611  |
| C                                    | -2.506419 | 1.360342  | 3.552286  | H                                     | -1.182153 | -0.970177 | 4.305807  |
| H                                    | 2.004313  | -3.090477 | 4.029106  | C                                     | -2.970580 | 0.282362  | 4.245757  |
| H                                    | -2.211895 | 1.783154  | 4.525016  | H                                     | -3.015366 | 2.171386  | 3.167038  |
| C                                    | -3.132620 | -0.021780 | 3.777057  | H                                     | -4.600036 | 1.365741  | 3.305994  |
| H                                    | -2.320739 | -0.748699 | 3.940036  | H                                     | -3.328961 | 0.691699  | 5.204498  |
| H                                    | -3.721644 | -0.001102 | 4.710734  | H                                     | -3.444100 | -0.709472 | 4.156261  |
